# Supplementary material for: Executable network of SARS-CoV-2-host interaction predicts drug combination treatments
Source: PubMed Central journal article supplement (PMC8844383; doi:10.1038/s41746-022-00561-5), 2022-02-14
Supplement: 41746_2022_561_MOESM1_ESM.pdf [file 41746_2022_561_MOESM1_ESM.pdf]

## Supplementary Materials

### Executable Network of SARS-CoV-2-Host Interaction Predicts Drug Combination Treatments

Rowan Howell<sup>1†</sup>, Matthew A. Clarke<sup>1†</sup>, Ann-Kathrin Reuschl<sup>2†</sup>, Tianyi Chen<sup>1</sup>, Sean Abbott-Imboden<sup>1</sup>, Mervyn Singer<sup>3</sup>, David M. Lowe<sup>4</sup>, Clare L. Bennett<sup>1,4</sup>, Benjamin Chain<sup>2,5</sup>, Clare Jolly<sup>2\*</sup>, Jasmin Fisher<sup>1\*</sup>

<sup>1</sup>UCL Cancer Institute, University College London, 72 Huntley Street, London WC1E 6DD, UK

<sup>2</sup>Division of Infection and Immunity, University College London, London WC1E 6BT, UK

<sup>3</sup>Bloomsbury Institute of Intensive Care Medicine, Division of Medicine, University College London, London WC1E 6BT, UK

<sup>4</sup>Institute of Immunity and Transplantation, University College London, London NW3 2PF, UK

<sup>5</sup>Department of Computer Science, Gower Street, University College London, London WC1E 6BT, UK

† These authors contributed equally to this work

\* Correspondence should be addressed to Jasmin Fisher [jasmin.fisher@ucl.ac.uk](mailto:jasmin.fisher@ucl.ac.uk) or Clare Jolly [c.jolly@ucl.ac.uk](mailto:c.jolly@ucl.ac.uk)

## **Supplementary Materials Contents**

|                                                                                                                                                                                  |    |
|----------------------------------------------------------------------------------------------------------------------------------------------------------------------------------|----|
| <b>Supplementary Notes</b> .....                                                                                                                                                 | 3  |
| <b>Supplementary Figure 1.</b> Effect of drug combinations identified by in silico screening.....                                                                                | 13 |
| <b>Supplementary Figure 2.</b> Effects of single and combination therapies (38 drugs that have passed phase II trials) in mild COVID-19.....                                     | 14 |
| <b>Supplementary Figure 3.</b> Effects of single and combination therapies (38 drugs that have passed phase II trials) in early stage, severe COVID-19.....                      | 23 |
| <b>Supplementary Figure 4.</b> Effects of single and combination therapies (38 drugs that have passed phase II trials) in late stage, severe COVID-19.....                       | 32 |
| <b>Supplementary Figure 5.</b> Differential characteristics of mild, early severe and late severe COVID-19..                                                                     | 41 |
| <b>Supplementary Figure 6.</b> Camostat and Apilimod inhibit replication of SARS-COV-2 in Caco-2 cells.....                                                                      | 42 |
| <b>Supplementary Figure 7.</b> The impact of Dexamethasone and Miltefosine on replication of SARS-CoV-2 in Caco-2 cells.....                                                     | 43 |
| <b>Supplementary Figure 8.</b> Effects of single and combination therapies (74 drugs, including those that have not passed phase II trials) in early stage, severe COVID-19..... | 44 |
| <b>Supplementary Figure 9.</b> Effects of single and combination therapies (74 drugs, including those that have not passed phase II trials) in late stage, severe COVID-19.....  | 53 |
| <b>Supplementary Figure 10.</b> Effects of single and combination therapies (all nodes) in early stage, severe COVID-19.....                                                     | 62 |
| <b>Supplementary Figure 11.</b> Effects of single and combination therapies (all nodes) in late stage, severe COVID-19.....                                                      | 72 |
| <b>Supplementary Figure 12.</b> Genetic risk factors associated with severe COVID-19.....                                                                                        | 82 |
| <b>Supplementary Figure 13.</b> Gating strategy used to identify expression of N protein and viability in Caco-2 cells.....                                                      | 83 |
| <b>Supplementary Table 1.</b> Regulatory edges in the network model.....                                                                                                         | 84 |
| <b>Supplementary Table 2.</b> Target functions used in the network model.....                                                                                                    | 89 |
| <b>Supplementary Table 3.</b> Constraints applied for each state of the network model.....                                                                                       | 91 |
| <b>Supplementary Table 4.</b> Experiments from the literature used to validate the network model.....                                                                            | 92 |
| <b>Supplementary Table 5.</b> Drugs used for in silico drug repurposing screens.....                                                                                             | 93 |
| <b>Supplementary Table 6.</b> Classification of nodes in the network model.....                                                                                                  | 94 |
| <b>Supplementary Table 7.</b> In silico simulation of Caco-2 cell drug treatments.....                                                                                           | 98 |
| <b>Supplementary References</b> .....                                                                                                                                            | 99 |

**Supplementary Data 1.** Results of *in silico* screens for the eight phenotypes in mild, early and late severe COVID-19 cases.....See File: Supplementary\_Data\_1.xlsx

## Supplementary Notes

We developed an executable model of SARS-CoV-2 infection in lung epithelial cells in order to explore combination therapies targeting the virus and host proteins. In this supplementary information we will begin by explaining how the model was constructed and the disease states it models. We will then describe in detail how the host and viral pathways were modelled. Next, we describe how the model was validated against *in vitro* experiments from the literature and clinical trials. Finally, we will discuss how, using the model, we performed *in silico* screening to identify drug combinations to treat SARS-CoV-2 infection.

### Modelling the SARS-CoV-2 infection regulatory network

Reviewing 100 publications describing SARS-CoV-2, SARS-CoV-1 and pan-viral disease mechanisms, we constructed a Qualitative Network model<sup>1</sup> using the BioModelAnalyzer<sup>2</sup> tool (Figure 2a, Supplementary Table 1, Supplementary References). These publications were reviewed to ensure that they were: relevant to our tissue of interest, lung epithelium; relevant to our disease cases, mild, early and late severe; and to ensure that there were no contradictory findings from other studies. This computational network model represents the regulatory network underlying SARS-CoV-2 infection in lung epithelium. The network consists of 175 nodes representing 36 viral proteins and complexes, 102 host proteins and complexes, 31 cellular processes, 5 RNA species and a node controlling the strength of innate immune response (Supplementary Table 6). The nodes representing cellular processes calculate the combined action of the individual proteins that regulate and enact these processes, which have their own nodes. For example, the *ViralFusion* process node represents the activity of the *TMPRSS2*, *CathepsinL* and *TPC2* nodes. This allows us to model the effect on Viral Fusion of separate or combined inhibition of the proteins involved in this process. Of the 31 cellular processes, 8 are considered to be clinically relevant biological processes, which are used to monitor COVID-19 patients' response to treatment. These nodes are connected by edges that can be either activating (→) or inhibiting (−) derived from published experimental evidence (Supplementary Table 1). Separately, we collated a set of test data from the literature based on responses of SARS-CoV-2 infected cells to treatment (Supplementary Table 4). This allowed us to iteratively test, expand and refine the model by comparing the model predictions to this dataset of known responses. The testing process is described in more detail below.

Each node in the network holds an integer value between 0 and its maximum range, which is 2 for most nodes, and 4 for some symptom nodes and cytokines. The value of each node represents its level of activity, for example when *CCL2* takes a value of 0 it is inactive and when it is at 4 it is at its most active. The level of each node is determined by the target function, with the inputs being the activity of incoming nodes. The default target function gives a level of activity that is the average of the activators of the node minus the average of the inhibitors. More complex target functions can be specified, which can be more complex e.g., to model an interaction that is inhibiting in one context but activating at another (Supplementary Table 2).

There are eight phenotypic readout nodes in the model: *Viral Entry*, *Viral Replication*, *Inflammation*, *Fibrosis*, *Cell Death*, *T-cell Infiltration*, *Syncytia Formation* and *Host Protein Synthesis*. The *Viral Entry* node represents the ability of the virus to enter the cell, while *Viral Replication* represents the production of new virions which can go on to infect other cells. *Inflammation* represents the summed effect of pro-inflammatory cytokines, minus the anti-inflammatory cytokines. *Fibrosis* represents the production of  $\alpha$ -collagen in the lungs, leading to lung scarring. *Cell Death* represents the level of death in a population of cells via apoptosis, necroptosis or pyroptosis. *T-cell Infiltration* represents the

movement of T-cells into the lungs, which is suspected to be the cause of T-cell lymphopenia seen in COVID-19 patients. *Syncytia Formation* represents the formation of cell-cell fusions seen in populations of infected cells. *Host Protein Synthesis* represents the ability of the cell to produce its own proteins.

There are three key input nodes to the model, which are used to describe the condition modelled. The infected state of the model is controlled by the *Virion* node, representing the presence of viral particles in the lungs. A node called *Immune Cells* is used to distinguish the presence of immune cells in tissue from epithelial cell lines, and so allows the comparison of the model to results from pure epithelial cell lines, but also *in vivo* data where immune cells and their reaction to the epithelial cells is recorded. The strength of the innate IFN-I and IFN-III response is thought to be critical to the progression and severity of COVID-19<sup>3</sup>. The *Sensitivity of IFN Response* node is used to convey both the response to, and magnitude of, IFN-I/III production in the range low, medium, high (0, 1, 2). All other unregulated nodes in the model represent constitutively active proteins.

### States of the model

The SARS-CoV-2 infection model can stabilise in one of four states (Figure 2b):

- Uninfected
- Mild COVID-19 disease
- Early stage, severe COVID-19 disease
- Late stage, severe COVID-19 disease

Each of these states is specified by a combination of constraints applied to the model. We describe each of these states and their constraints below.

The **uninfected** state is controlled by setting the *Virion* node to be 0. In this state, all symptom nodes take value 0 (with the exception of *Host Protein Synthesis*, which is 2), representing the levels seen in healthy cells. This state is used as a control to compare with the infected states.

The **mild COVID-19** state represents a patient that is able to mount a robust innate immune response to SARS-CoV-2 infection, and as a result is able to limit Viral Replication in the lungs. This is controlled by setting the *Sensitivity of IFN Response* node to be 1, allowing a normal level of IFN induction in response to infection. In this state, both *Viral Replication* and *Viral Entry* are reduced relative to the early stage of the severe case, as some Interferon Stimulated Genes (ISGs)<sup>4</sup>, such as ZAP and OAS, cause degradation of the viral genome<sup>5</sup>, while others, such as CH25H<sup>6</sup> and LY6E<sup>7</sup> are capable of inhibiting entry of the virus into the cell. The *Inflammation* node reaches level 2, driven by both IFN-dependent and virus-dependent pathways. This is considered to be a control case, as such patients do not require medical intervention. However, it is not currently possible to distinguish between mild and severe cases in the early stages of the disease, so any treatment proposed to treat severe cases must be shown not to be detrimental to the mild response, such as by inhibiting beneficial IFN response. Those drugs used must also not have such severe side-effects that use in the mild case would be harmful, but predicting side-effects beyond the effects on the eight modelled phenotypes in lung epithelium is outside the scope of the model.

The **early stage, severe COVID-19** case represents patients who are unable to mount a robust IFN response and so are in the early stages of a disease progression that will become severe, but who may still have mild symptoms at presentation. In this state viral replication proceeds rapidly in the lungs. This state is controlled by setting the *Sensitivity of IFN Response* to 0. In this state *Viral Replication* and *Viral Entry* reach their maximum value of 4. *Inflammation* reaches level 1 in the absence of IFN-

dependent inflammation. In this case we search for treatments to limit the spread of infection by reducing the *Viral Replication* node.

There is a growing body of evidence that, although SARS-CoV-2 initially suppresses the IFN response, late stages of infection are characterised by high levels of IFN signalling<sup>8</sup>, corresponding to the **late stage, severe COVID-19** case. This condition is modelled by setting the *Sensitivity of IFN Response* node and the *Viral Genome* node to 2. Setting *Sensitivity of IFN Response* to 2 leads to high levels of IFN induction, which totally dampen both *Viral Replication* and *Viral Entry* but also lead to Inflammation reaching 3. We set *Viral Genome* to 2 to represent that significant viral replication has already occurred by this stage of the disease and so there is a burden of viral RNA present even though replication has peaked. In this case we look for treatment to lower the *Inflammation* node, as this is the most dangerous aspect of this stage of the disease.

### Key cellular processes and signalling represented in the model

Our model focuses on the following key aspects of SARS-CoV-2 replication and pathogenesis:

**Viral entry:** A cell becomes infected when a SARS-CoV-2 virion binds to the cell through interaction between membrane-bound ACE2 and the spike protein<sup>9-11</sup>. Once bound, the virus enters the cell using host factors TMPRSS2, cathepsinL and TPC2. Upon viral entry, the virus introduces the viral genome, wrapped in the nucleocapsid (N) protein, to the cell<sup>12</sup>.

**Viral translation:** The viral proteins can be divided into 3 main categories: structural, non-structural and accessory<sup>13</sup>. There are 4 structural proteins: the spike (S), nucleocapsid (N), envelope (E) and membrane proteins (M), which together with the viral genome form the virion<sup>12</sup>. There are 16 non-structural proteins (nsps 1-16), which perform key tasks such as viral protein processing and replication of the viral genome<sup>13</sup>. There are also a number of accessory proteins, although they are less well understood<sup>12</sup>. Only a subset of the ORFs in this region of the genome are actually expressed as proteins. On the basis of transcriptomic and proteomic evidence we include p3a, p3b, p6, p7a, p7b, p8, p9b and p9c<sup>14-16</sup>.

Two large ORFs: *ORF1a* and *ORF1ab* are translated directly from the viral (RNA) genome into polyproteins pp1a and pp1ab<sup>13</sup>. Two proteases, 3CLpro (nsp5) and PLpro (nsp3) cleave these polyproteins into the constituent nsps. The structural and accessory proteins are translated from small genomic RNAs (sgRNAs) which are transcribed from the genome by RNA-Dependent RNA Polymerase (RDRP). The RDRP activity is performed by a complex formed of nsp7, nsp8 and nsp12<sup>17</sup>. The sgRNAs are then capped in a mechanism involving nsp10, nsp14 and nsp16, allowing their translation into proteins<sup>18</sup>.

**Viral replication:** The virus reproduces by the formation of new virions in the ERGIC (ER-Golgi Intermediate Compartment)<sup>19</sup>. These particles are assembled from the four structural proteins surrounding the viral genome. After formation, the virions exit the cell through exocytosis.

**Innate immune detection of the virus:** Two innate virus sensing pathways are thought to be activated by SARS-CoV-2 in epithelial cells<sup>20</sup>. The first relies on cytosolic Pattern Recognition Receptors (PRRs), namely RIG-I and MDA5 which detect viral RNA, leading to activation of the kinase TBK1<sup>21</sup>. TBK1 phosphorylates the transcription factors IRF3 and IRF7, leading to expression of Type I and Type III IFNs. The second pathway involves the TLR3 receptor, which recognizes dsRNA species that form during replication of the viral genome<sup>21</sup>. This pathway also activates TBK1, as well as promoting inflammation by activating NF- $\kappa$ B, through IKK and I $\kappa$ B $\alpha$ <sup>22</sup>.

**IFN signalling pathway:** Type I and Type III IFNs are expressed in lung epithelial cells<sup>3</sup> but Type II IFNs are only produced in some immune cells<sup>23</sup>. However, all types of IFNs are recognized by epithelial cells. There are multiple IFNs of each type as well as multiple receptors, but to simplify the model we

consider only the different types of IFN and a single receptor for each type. Upon activation of the receptor, a signal is passed through JAK-STAT signalling leading to expression of Interferon-Stimulated Genes (ISGs)<sup>4</sup>. In this model we include the ISGs CH25H and LY6E, which inhibit viral entry<sup>6,7</sup>; ZAP and OAS which lead to degradation of viral RNA<sup>4,24</sup>; IFITM which has been shown to inhibit spike-mediated fusion<sup>25</sup>; PKR which can inhibit translation<sup>26</sup>; and iNOS which is a cellular producer of Nitrous Oxide<sup>27</sup>.

**Cytokine secretion:** Alongside the IFNs, the model includes a number of cytokines expressed both directly by epithelial cells and indirectly via immune cells. NF- $\kappa$ B is responsible for the expression of a wide range of cytokines and is a signalling hub on which multiple lines of signalling converge<sup>22</sup>, including the Unfolded Protein Response (UPR)<sup>28</sup> and IFN signalling<sup>29</sup>. The cytokines represented in the model were chosen to represent those commonly observed in COVID-19 patients and correlated with worse outcomes<sup>30,31</sup>.

**Cell death:** The model includes the pathways regulating apoptosis, pyroptosis and necroptosis. The model contains Caspases-1, 3, 8 and 10, with the activity of Caspase-3 controlling the level of apoptosis<sup>32</sup>. Pyroptosis is controlled by the activity of gasdermins D and E, which are regulated by the inflammasome and PANoptosome complexes respectively<sup>33</sup>. Necroptosis is regulated by MLKL which is also controlled by the PANoptosome<sup>32</sup>.

**Renin-angiotensin system:** ACE2 is the key receptor used by SARS-CoV-2 to enter the cell, but it is also an enzyme which is important for regulation of angiotensin, a hormone that regulates blood pressure<sup>34</sup>. In healthy cells, ACE2 converts AngII into Ang1-7, helping to shift the balance in favour of Ang1-7<sup>35</sup>. Interaction of ACE2 with spike proteins is thought to prevent its catalytic activity, leading to an increase in AngII levels. AngII is detected by the AT1R, while Ang1-7 is detected by MasR. An imbalance between the activities of these two receptors leads to ER stress and activation of MAPK and ROCK kinases<sup>36</sup>.

**Translation of host proteins:** Translation of host proteins can proceed via both cap-dependent and cap-independent pathways<sup>37</sup>, while viral proteins rely on cap-dependent pathways<sup>38</sup>. Both pathways rely on ribosomal subunits, however they have different requirements in terms of eIFs. The viral protein nsp1 binds to the 40S ribosomal subunit and causes preferential translation of viral transcripts<sup>39</sup>.

**Endoplasmic Reticulum (ER) stress:** ER stress is caused both by imbalance of the Ang1-7:AngII ratio and also by the S and p3a proteins<sup>35,40,41</sup>. ER stress leads to activation of the Unfolded Protein Response (UPR)<sup>28</sup>. The UPR has 3 pathways: ATF6 which acts to decrease protein translation; and IRE1 and XBP1 which cause inflammation.

### **Separation of initial infection and IFN response in the model**

In order to distinguish between initial viral entry and viral entry after the response induced by the innate immune system, we use two separate nodes. The *Viral Entry1* node represents the initial entry of the virus into the cell and is uninhibited by the IFN response, while the *Viral Entry* node shows the effects of this IFN response. If the model stabilises in a state where *Viral Entry1* and *Viral Replication* are active but *Viral Entry* is fully inhibited, we interpret this as showing that a small population of cells was initially infected but that the subsequent IFN response prevented a spreading of infection throughout the wider population of cells. Similarly, we include a *Viral Genome Degradation* node to represent the effects of ISGs that restrict viral RNA. This node inhibits the *Viral Replication* node, representing the requirement of the virion for intact viral RNA, but not the *Viral Genome* node, which represents the initial proliferation of viral RNA.

Since our model runs from all possible initial states, IFN-I and NF- $\kappa$ B could self-activate each other<sup>22,29</sup>. To prevent this undesired behaviour, we model the induction of IFNs through the innate immune sensing machinery alone and discount positive feedback occurring through NF- $\kappa$ B, as the former interaction is more relevant in the early stage of the severe disease. Conversely, in the late stage, IFN activity is high due to many mechanisms, some of which remain unknown, driving a persistent and maladaptive inflammatory response. This is represented by the high level of the *Sensitivity of IFN Response* node. Taken together, these choices allow the model to represent ongoing feedback alongside the initial stimulus, giving greater insight into the underlying process.

### Validating the model against publicly available data

In order to establish whether the model faithfully reproduces experimental data, we tested it against data from scientific literature. We collected 81 experiments derived from 21 published and pre-print studies using SARS-CoV-2, specific viral proteins, SARS-CoV-1 and relevant host factors. The full list of experimental observations we used to test the model is summarised in Supplementary Table 4. We reproduced the conditions described in each experiment as constraints on the model by fixing the nodes representing the experimental variables to a specific value. For example, the effect of an inhibitor was modelled by setting the relevant node to the constant value of 0. We then confirmed whether the resulting steady state of the model matched the experimental results. For example, Hoffmann, M et al.<sup>42</sup> used the protease inhibitor E-64d to inhibit cathepsinL in VeroE6 cells expressing exogenous TMPRSS2. To reproduce this, we set *TMPRSS2* to 1, and *cathepsinL* to 0. Hoffmann, M et al.<sup>42</sup> showed that this treatment reduced viral entry; indeed our model predicts that E-64d reduces the level of *Viral Entry* from 2 to 1, matching the experiment.

Our model reproduced 74 experimental observations out of the 81 tested. Zhang, X. et al.<sup>41</sup> shows that IFN-I is induced by expression of p3a, which the model cannot recapitulate, most likely as in our model NF- $\kappa$ B does not induce IFNs. Similarly, Thorne L. G. et al.<sup>43</sup> found that inhibition of NF- $\kappa$ B with the IKK inhibitor TPCA-1 reduced IFN expression, a finding that is also not recapitulated by the model. Furthermore, Zhang, X. et al.<sup>41</sup> also found that expression of p3a leads to production of TNF- $\alpha$  in A549. The model assumes that TNF- $\alpha$  is produced only by macrophages<sup>44</sup>, meaning it will not be produced in an epithelial cell line. This is also the reason that the model does not reproduce the findings of Hsu, A. C.-Y. et al.<sup>40</sup>, that TNF- $\alpha$  is induced by expression of S protein in a minimally immortalized epithelial cell line, BCI-NS1.1. The model is also unable to reproduce the findings of Hsu, A. C.-Y. et al.<sup>40</sup> that S-induced induction of various cytokines is suppressed by the ERK inhibitor, Ulixertinib. Banerjee, A. K. et al.<sup>39</sup> show that nsp8 and nsp9 inhibit IFN release by binding to the 7SL RNA component of the Signal Recognition Particle (SRP), which is represented in the model. They then show that nsp8 and nsp9 inhibit the ISG response of cells treated with IFN. Inhibition of the SRP by nsp8 and nsp9 is represented in the model but this mechanism is not sufficient to explain the experiment described so we cannot fully reproduce the experiment. Thorne L. G. et al.<sup>43</sup> found that IL-6 production is not affected by inhibition of MDA5 or Jak1/2, a disagreement with the model we cannot explain at this point. Furthermore, Thorne L. G. et al.<sup>43</sup> found that the IKK inhibitor TPCA-1 and the Jak1/2 inhibitor Ruxolitinib prevented virus-induced cell death in Calu3 cells, a finding not reproduced in the model. Finally, Thorne L. G. et al.<sup>43</sup> also found that Ruxolitinib had no effect on viral replication in their Calu3 cultures, while the model in fact predicts that inhibition of IFN signalling, such as through Jak1/2 inhibition, will increase viral replication. This is likely due to the distinction between viral challenge in cell culture, where all cells are all equally permissive and presented with the virus simultaneously, and the situation in a human lung, where the infection starts off localised in a permissive cell subset<sup>45</sup>, allowing IFN signalling to be induced prior to infection in neighbouring regions. Certainly, there is evidence that a robust, timely IFN response is associated with mild disease<sup>46,47</sup> in humans and that loss-of-function mutations in the IFN response pathway are associated with more severe disease<sup>48</sup>. Therefore, while the model does not capture the behaviour of Ruxolitinib in cell culture, this may reflect the differences between cell culture and human disease.

Having tested the model against experimental data, we then checked the behaviour of commonly used drugs using the model. Remdesivir is a nucleoside analogue that blocks RDRP and has shown promise against SARS-CoV-2 in cell lines<sup>49</sup> and as a treatment for COVID-19<sup>50</sup>. We tested the effects of Remdesivir by setting the RDRP complex nsp12-nsp7-nsp8 to 0 and checked the steady state of the model in each of the clinically relevant conditions (Figure 3a). We specifically checked each of the eight biological processes nodes and compared their value to the untreated state. In this case, the model recapitulates the activity of Remdesivir, showing a total loss of Viral Replication. We repeated this analysis for Lopinavir, Tocilizumab, Dexamethasone, Roferon-A and Ruxolitinib.

Having established that the model captures the behaviour of commonly used drugs, we were interested to see if the model can predict the impact of genetic risk factors associated with increased risk of severe COVID-19. Zhang, Q. et al.<sup>51</sup> found that mutations in the IFN-I pathway, including IFNAR, lead to an increased risk of severe disease. Pairo-Castineira, E. et al.<sup>48</sup> also identified mutations in IFNAR, as well as OAS. We tested the impact of these genetic background in the same way that we tested the drugs effect (Supplementary Figure 12). Notably, the model predicts that loss of function mutations in IFNAR or OAS would increase viral replication in mild COVID-19 (Supplementary Figure 12a, b), suggesting that people with these mutations are at a higher risk of developing severe disease. We also tested the findings of Boudewijns, R. et al.<sup>52</sup>, who used a hamster model of severe SARS-CoV-2 infection to show that in the late stages of disease STAT2<sup>-/-</sup> hamsters had increased viral load but reduced inflammation, which was in agreement with our model (Supplementary Figure 12c).

### ***In silico* screens of new and improved COVID-19 drug combination treatments**

We used the model to simulate the effect of applying drugs individually and in all combinations of two drugs, in each of the four states of the model. The network includes many nodes which are the targets of existing selective therapies, such as Miltefosine, an Akt inhibitor<sup>53</sup>. For each node, we searched the literature for drugs targeting that node. This resulted in a table of 74 potential drugs (Supplementary Table 5). Of these 74, we further filtered to focus on those that had passed Phase II clinical trials (Table 1) For each treatment tested and condition we recorded the steady state value of the 8 symptom nodes. In the case that a fixed-point steady state could not be found, due to the steady state being a loop or there being multiple steady states and/or loops, we used the mid-point of the upper and lower bounds BMA could place on the behaviour of that node as representative of the predominant behaviour in these cases. This was taken across all steady states and calculated using the algorithm described in Cook et al<sup>54</sup>. The individual results for the eight phenotypes in the mild, early and late severe cases are reported in Supplementary Data 1. Here, the column "Number\_of\_perturbations" indicates whether a single or pairwise combination was applied; the column "Disease\_State" indicates mild, early severe or late severe disease state; the column "Perturbation\_A" indicates the first perturbation applied; the column "Level\_A" indicates the level the first node is set to, or not applicable (NA) as the effect is defined in Supplementary Table 5; the column "Perturbation\_B" indicates the second perturbation applied or not applicable (NA); the column "Level\_B" indicates the level the second node is set to or not applicable (NA); the column "Lower bound" shows the lower bound for the phenotype measured determined by the algorithm; the column "Upper bound" shows the upper bound for the phenotype measured determined by the algorithm and the column "Midpoint" shows the midpoint between the upper and lower bound.

We focussed our analysis on two specific parameters and conditions: viral replication in the early stage of the severe case and inflammation in the late stage of the severe case. First, we considered the effect of each of the 38 drugs individually on viral replication in the early severe case (Figure 4a). We plotted the results as a heatmap, showing the level of *Viral Replication* after each treatment. This showed that many drugs in consideration as treatments for COVID-19, such as Baracitinib<sup>55</sup>, were effective in our model. However, in order to effectively treat patients at this stage of disease, it may be necessary to



administer these drugs as post-exposure prophylaxis. We then turned our attention to the combination therapies (Figure 4b). Here we again plotted the results as a heatmap, with each square showing the value of *Viral Replication* upon treatment with the drugs shown on the x and y axis. We looked specifically for combinations that improved upon the single therapies, for example the combination of Dexamethasone and Ulixertinib. We repeated this analysis for Inflammation in the severe, late infection condition (Figures 4c, d).

We applied the above analysis to all eight phenotypic readout nodes in the mild, severe early and severe late conditions (Supplementary Figures 2-4). We also extended this analysis to the full list of 74 targeted drugs (Supplementary Figures 8, 9). Furthermore, we tested the impact of inhibiting all nodes individually and in combination, even where no drugs targeting these proteins currently exists (Supplementary Figures 10, 11).

In order to examine the effect of each drug combination on all the biological processes modelled, we plotted these values for each combination as a radar chart (Figure 5, Supplementary Figure 1). In these plots, the biological processes nodes are arranged in a circle and the value reached with a given treatment is plotted as point, which are then joined together between all biological processes. A representative monotherapy is plotted in grey with the combination therapy plotted in colour (orange for treatments identified for severe, early cases and red for treatments identified for severe, late cases). We do not model the dose relations of drug combinations and so cannot distinguish between synergistic and additive effects. However, we particularly focus on cases in which two drugs achieve an effect neither could as a monotherapy. For example, Ulixertinib and Miltefosine were predicted to have no effect on viral replication in the early stage of severe disease when applied as monotherapies but were predicted to have strong effect together (Fig 4a, b).

### ***In silico* simulation of Caco-2 cell drug treatments**

We validated the model's predictions that Apilimod and Camostat; and Dexamethasone and Miltefosine act together to reduce viral replication. We test these predictions using Caco-2 cell cultures as they do not mount a significant IFN response to SARS-CoV-2 infection<sup>56</sup>, providing a model of the severe, early COVID-19 condition. We modelled Caco-2 cells by setting the *Immune Cells* node to 0 as this is a clonal colorectal epithelial cell culture, and the *Sensitivity Of IFN Response* node to 0 to reflect the lack of significant IFN response. These simulations predict that combinations of Apilimod and Camostat, and Dexamethasone and Miltefosine, have a greater effect in combination than alone in Caco-2 cells (Supplementary Table 7).

### **Differential characteristics of different states of COVID-19**

Individuals with COVID-19 display a wide range of symptoms and disease outcomes, with severity ranging from asymptomatic to fatal<sup>57</sup>. Therefore, there is a need for clinical biomarkers to aid in triage of COVID-19 patients. We investigated the steady states of our model representing the different states of disease to look for differences that could potentially distinguish between mild and severe cases. We applied hierarchical clustering to the level of all nodes in each state (Supplementary Figure 5a). The resulting heatmap reveals clusters of nodes that differ between states of the disease (Supplementary Figure 5b).

Hierarchical clustering identifies IFN-I, IFN-II, IFN-III, TNF- $\alpha$ , IL-2, IL-1B, IL-6, IL-8, IL-10, IL-18, CCL2, CXCL9, CXCL10 and CXCL11. All of these factors are raised in the late versus early severe stage of disease, in line with observed increases in IFN-I, IFN-II, IFN-III, IL-2, IL-10 and IL-18 reported in longitudinal studies<sup>8,30</sup>. The model also predicts that these factors are higher in the mild state compared to the early severe state of disease, reflecting the effective immune response in these

patients. Many of these factors, especially TNF- $\alpha$ , IL-6, IL-8, IL-10 and CXCL10 have been identified as prognostic markers for severity of COVID-19 in hospitalised patients<sup>30,31,47,58,59</sup>.

## References

1. Schaub, M. A., Henzinger, T. A. & Fisher, J. Qualitative networks: a symbolic approach to analyze biological signaling networks. *BMC Syst. Biol.* **1**, 4 (2007).
2. Benque, D. *et al.* BMA: Visual Tool for Modeling and Analyzing Biological Networks. *Comput. Aided Verif.* 686–692 (2012).
3. Park, A. & Iwasaki, A. Type I and Type III Interferons – Induction, Signaling, Evasion, and Application to Combat COVID-19. *Cell Host Microbe* **27**, 870–878 (2020).
4. Schoggins, J. W. & Rice, C. M. Interferon-stimulated genes and their antiviral effector functions. *Curr. Opin. Virol.* **1**, 519–525 (2011).
5. Nchioua, R. *et al.* The Zinc Finger Antiviral Protein restricts SARS-CoV-2. *bioRxiv* **130**, 2620–40.
6. Zang, R. *et al.* Cholesterol 25-hydroxylase suppresses SARS-CoV-2 replication by blocking membrane fusion. *Proc. Natl. Acad. Sci.* **117**, 32105–32113 (2020).
7. Pfaender, S. *et al.* LY6E impairs coronavirus fusion and confers immune control of viral disease. *Nat. Microbiol.* **5**, 1330–1339 (2020).
8. Lucas, C. *et al.* Longitudinal analyses reveal immunological misfiring in severe COVID-19. *Nature* **584**, 463–469 (2020).
9. Shang, J. *et al.* Cell entry mechanisms of SARS-CoV-2. *Proc. Natl. Acad. Sci. U. S. A.* **117**, 202003138 (2020).
10. Hoffmann, M. *et al.* SARS-CoV-2 Cell Entry Depends on ACE2 and TMPRSS2 and Is Blocked by a Clinically Proven Protease Inhibitor. *Cell* **181**, 271-280.e8 (2020).
11. Daniloski, Z. *et al.* Identification of Required Host Factors for SARS-CoV-2 Infection in Human Cells. *Cell* **184**, 92-105.e16 (2021).
12. Wang, Y., Grunewald, M. & Perlman, S. Coronaviruses: An Updated Overview of Their Replication and Pathogenesis. in *Methods in molecular biology (Clifton, N.J.)* vol. 2203 1–29 (2020).
13. Chen, Y., Liu, Q. & Guo, D. Emerging coronaviruses: Genome structure, replication, and pathogenesis. *J. Med. Virol.* **92**, 418–423 (2020).
14. Davidson, A. D. *et al.* Characterisation of the transcriptome and proteome of SARS-CoV-2 reveals a cell passage induced in-frame deletion of the furin-like cleavage site from the spike glycoprotein. *Genome Med.* **12**, 68 (2020).
15. Bouhaddou, M. *et al.* The Global Phosphorylation Landscape of SARS-CoV-2 Infection. *Cell* **182**, 685-712.e19 (2020).
16. Kim, D. *et al.* The Architecture of SARS-CoV-2 Transcriptome. *Cell* **181**, 914-921.e10 (2020).
17. Chen, J. *et al.* Structural Basis for Helicase-Polymerase Coupling in the SARS-CoV-2 Replication-Transcription Complex. *Cell* **182**, 1560-1573.e13 (2020).
18. Viswanathan, T. *et al.* Structural basis of RNA cap modification by SARS-CoV-2. *Nat. Commun.* **11**, 3718 (2020).
19. Fehr, A. R. & Perlman, S. Coronaviruses: an overview of their replication and pathogenesis. *Methods Mol. Biol.* **1282**, 1–23 (2015).
20. Vabret, N. *et al.* Immunology of COVID-19: Current State of the Science. *Immunity* **52**, 910–941 (2020).
21. Mogensen, T. H. Pathogen Recognition and Inflammatory Signaling in Innate Immune Defenses. *Clin. Microbiol. Rev.* **22**, 240–273 (2009).
22. Liu, T., Zhang, L., Joo, D. & Sun, S.-C. NF- $\kappa$ B signaling in inflammation. *Signal Transduct. Target. Ther.* **2**, 17023 (2017).
23. Ivashkiv, L. B. IFN $\gamma$ : signalling, epigenetics and roles in immunity, metabolism, disease and

- cancer immunotherapy. *Nat. Rev. Immunol.* **18**, 545–558 (2018).
24. Nchioua, R. *et al.* The Zinc Finger Antiviral Protein restricts SARS-CoV-2. *MBio* **130**, 2620–40 (2020).
  25. Buchrieser, J. *et al.* Syncytia formation by SARS-CoV-2-infected cells. *EMBO J.* **39**, 1–12 (2020).
  26. Gal-Ben-Ari, S., Barrera, I., Ehrlich, M. & Rosenblum, K. PKR: A Kinase to Remember. *Front. Mol. Neurosci.* **11**, 480 (2019).
  27. Karki, R. *et al.* Synergism of TNF- $\alpha$  and IFN- $\gamma$  Triggers Inflammatory Cell Death, Tissue Damage, and Mortality in SARS-CoV-2 Infection and Cytokine Shock Syndromes. *Cell* **184**, 149-168.e17 (2021).
  28. Pathinayake, P. S. *et al.* Understanding the Unfolded Protein Response in the Pathogenesis of Asthma. *Front. Immunol.* **9**, 621–13 (2018).
  29. Makris, S., Paulsen, M. & Johansson, C. Type I Interferons as Regulators of Lung Inflammation. *Front. Immunol.* **8**, 1–10 (2017).
  30. Liu, J. *et al.* Longitudinal characteristics of lymphocyte responses and cytokine profiles in the peripheral blood of SARS-CoV-2 infected patients. *EBioMedicine* **55**, 102763 (2020).
  31. Diao, B. *et al.* Reduction and Functional Exhaustion of T Cells in Patients With Coronavirus Disease 2019 (COVID-19). *Front. Immunol.* **11**, 1–7 (2020).
  32. Lee, S., Channappanavar, R. & Kanneganti, T.-D. Coronaviruses: Innate Immunity, Inflammasome Activation, Inflammatory Cell Death, and Cytokines. *Trends Immunol.* **41**, 1083–1099 (2020).
  33. van den Berg, D. F. & te Velde, A. A. Severe COVID-19: NLRP3 Inflammasome Dysregulated. *Front. Immunol.* **11**, 1708–6 (2020).
  34. Sriram, K., Loomba, R. & Insel, P. A. Targeting the renin-angiotensin signaling pathway in COVID-19: Unanswered questions, opportunities, and challenges. *Proc. Natl. Acad. Sci.* **117**, 29274–29282 (2020).
  35. Forrester, S. J. *et al.* Angiotensin II Signal Transduction: An Update on Mechanisms of Physiology and Pathophysiology. *Physiol. Rev.* **98**, 1627–1738 (2018).
  36. Meng, Y. *et al.* The angiotensin-converting enzyme 2/angiotensin (1-7)/Mas axis protects against lung fibroblast migration and lung fibrosis by inhibiting the NOX4-derived ROS-mediated RhoA/Rho kinase pathway. *Antioxid. Redox Signal.* **22**, 241–258 (2015).
  37. Sonenberg, N. & Hinnebusch, A. G. Regulation of Translation Initiation in Eukaryotes: Mechanisms and Biological Targets. *Cell* **136**, 731–745 (2009).
  38. Nakagawa, K., Lokugamage, K. G. & Makino, S. Viral and Cellular mRNA Translation in Coronavirus-Infected Cells. *Adv. Virus Res.* **96**, 165–192 (2016).
  39. Banerjee, A. K. *et al.* SARS-CoV-2 Disrupts Splicing, Translation, and Protein Trafficking to Suppress Host Defenses. *Cell* **183**, 1325-1339.e21 (2020).
  40. Hsu, A. C.-Y. *et al.* SARS-CoV-2 Spike protein promotes hyper-inflammatory response that can be ameliorated by Spike-antagonistic peptide and FDA-approved ER stress and MAP kinase inhibitors in vitro. *bioRxiv* 2020.09.30.317818 (2020) doi:10.1101/2020.09.30.317818.
  41. Zhang, X. *et al.* Sequential ER stress and inflammatory responses are induced by SARS-CoV-2 ORF3 through ERphagy. *bioRxiv* (2020) doi:10.1101/2020.11.17.387902.
  42. Hoffmann, M. *et al.* SARS-CoV-2 Cell Entry Depends on ACE2 and TMPRSS2 and Is Blocked by a Clinically Proven Protease Inhibitor. *Cell* **181**, 271-280.e8 (2020).
  43. Thorne, L. G. *et al.* SARS-CoV-2 sensing by RIG-I and MDA5 links epithelial infection to macrophage inflammation. *bioRxiv* 2020.12.23.424169 (2020) doi:10.1101/2020.12.23.424169.
  44. Falvo, J. V., Tsytsykova, A. V. & Goldfeld, A. E. Transcriptional Control of the TNF Gene. in *TNF Pathophysiology* vol. 11 27–60 (KARGER, 2010).
  45. Lee, I. T. *et al.* ACE2 localizes to the respiratory cilia and is not increased by ACE inhibitors or ARBs. *Nat. Commun.* **11**, 5453 (2020).
  46. Hadjadj, J. *et al.* Impaired type I interferon activity and inflammatory responses in severe

- COVID-19 patients. *Science (80-. )*. **369**, 718–724 (2020).
47. Arunachalam, P. S. *et al.* Systems biological assessment of immunity to mild versus severe COVID-19 infection in humans. *Science (80-. )*. **369**, 1210–1220 (2020).
  48. Pairo-Castineira, E. *et al.* Genetic mechanisms of critical illness in COVID-19. *Nature* **591**, 92–98 (2021).
  49. Wang, M. *et al.* Remdesivir and chloroquine effectively inhibit the recently emerged novel coronavirus (2019-nCoV) in vitro. *Cell Res.* **30**, 269–271 (2020).
  50. Beigel, J. H. *et al.* Remdesivir for the Treatment of Covid-19 — Final Report. *N. Engl. J. Med.* **383**, 1813–1826 (2020).
  51. Zhang, Q. *et al.* Inborn errors of type I IFN immunity in patients with life-threatening COVID-19. *Science (80-. )*. **21**, eabd4570 (2020).
  52. Boudewijns, R. *et al.* STAT2 signaling restricts viral dissemination but drives severe pneumonia in SARS-CoV-2 infected hamsters. *Nat. Commun.* **11**, 5838 (2020).
  53. Nitulescu, G. M. *et al.* Akt inhibitors in cancer treatment: The long journey from drug discovery to clinical use (Review). *Int. J. Oncol.* **48**, 869–885 (2016).
  54. Cook, B., Fisher, J., Krepska, E. & Piterman, N. Proving Stabilization of Biological Systems. in *VMCAI* vol. 11 134–149 (Springer, 2011).
  55. Richardson, P. *et al.* Baricitinib as potential treatment for 2019-nCoV acute respiratory disease. *Lancet* **395**, e30–e31 (2020).
  56. Stanifer, M. L. *et al.* Critical Role of Type III Interferon in Controlling SARS-CoV-2 Infection in Human Intestinal Epithelial Cells. *CellReports* **32**, 107863.
  57. Guan, W. *et al.* Clinical Characteristics of Coronavirus Disease 2019 in China. *N. Engl. J. Med.* **382**, 1708–1720 (2020).
  58. Chen, Y. *et al.* Blood molecular markers associated with COVID-19 immunopathology and multi-organ damage. *EMBO J.* **39**, 1–23 (2020).
  59. Del Valle, D. M. *et al.* An inflammatory cytokine signature predicts COVID-19 severity and survival. *Nat. Med.* **26**, 1636–1643 (2020).

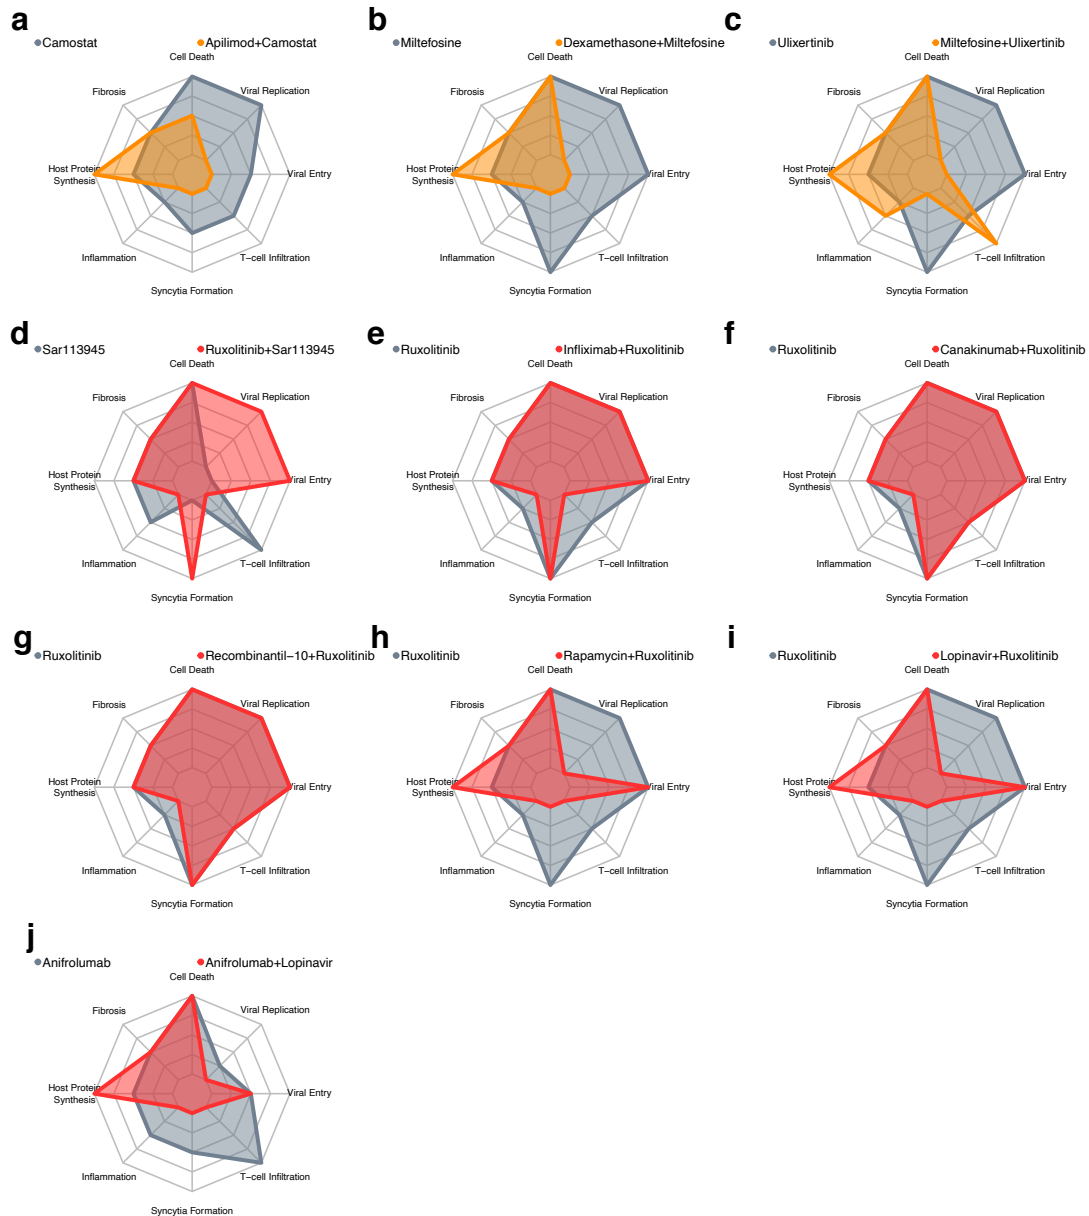

**Supplementary Figure 1. Effect of drug combinations identified by in silico screening.** (a-c) The effect of monotherapy vs drug combinations identified to limit viral replication under the early stage, severe Covid-19 condition. Monotherapy (grey), combination (orange), with the strength of the symptom denoted by radial distance. (d-j) The effect of monotherapy vs drug combinations identified to reduce inflammation under the late stage, severe Covid-19 condition. Monotherapy (grey), combination (Red). All nodes normalized to be between 0 and 100%.

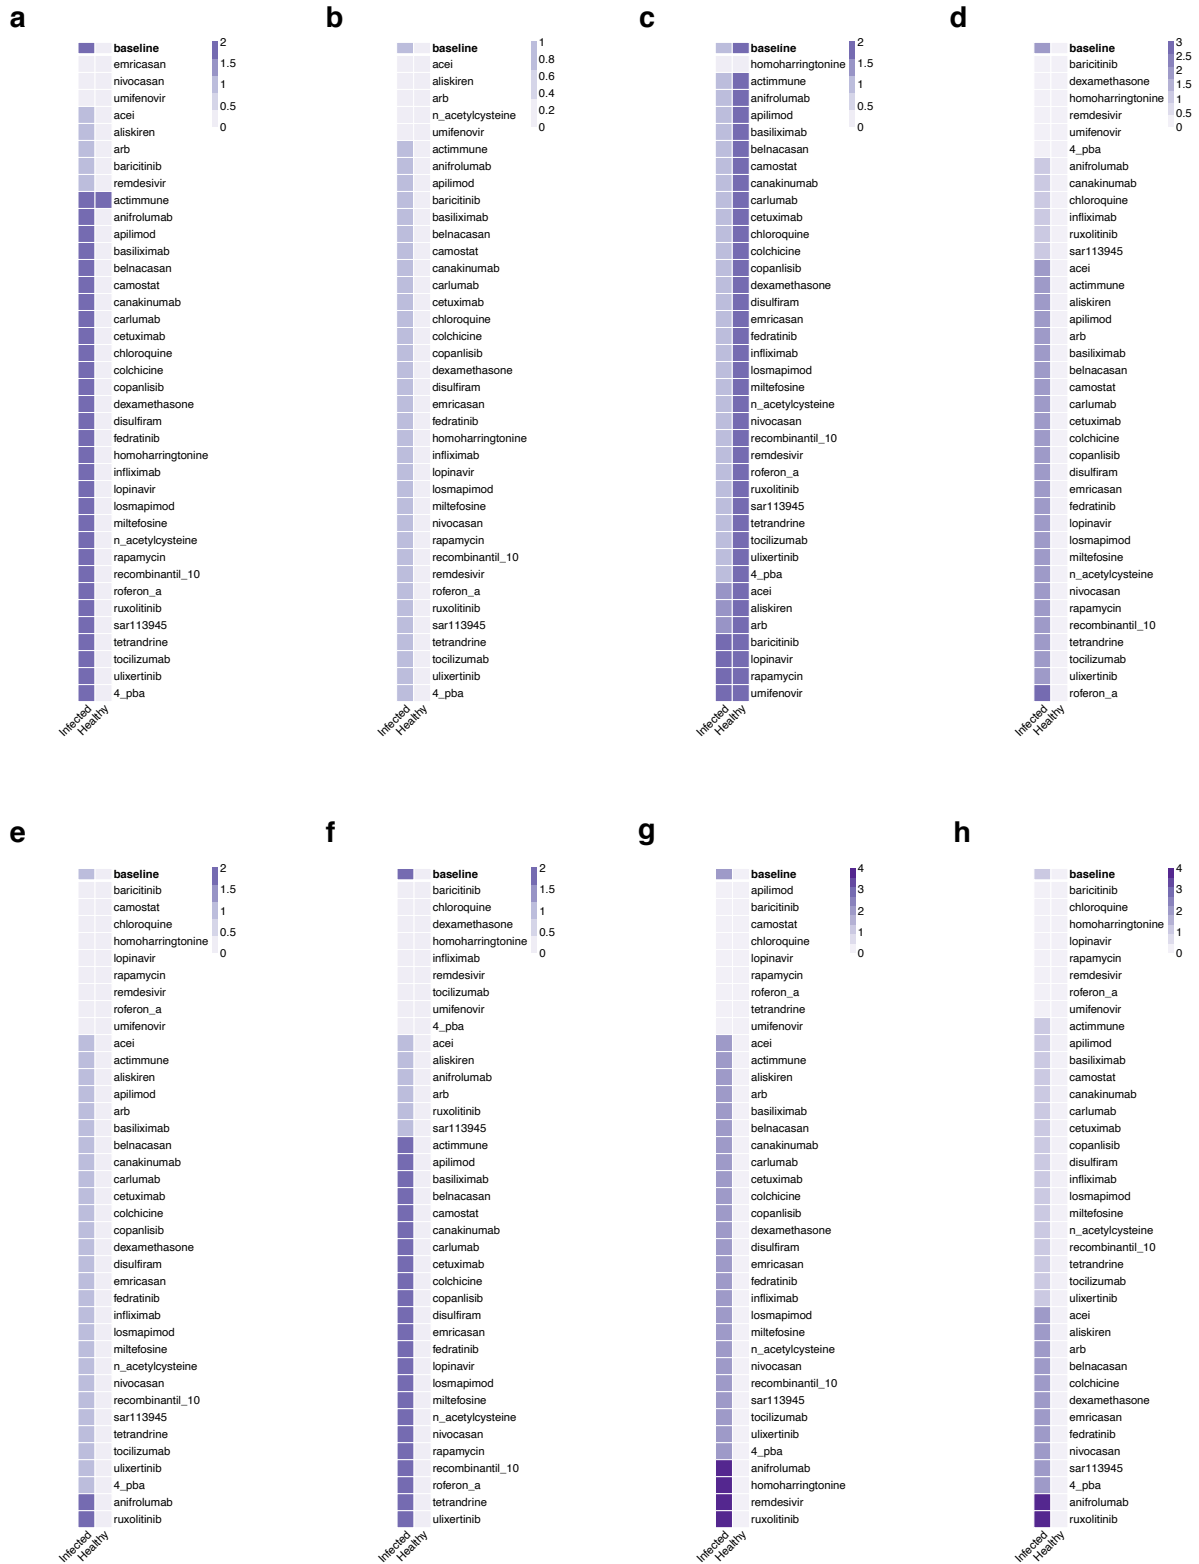

**Supplementary Figure 2 a-h. Effects of single therapies (38 drugs that have passed phase II trials) in mild COVID-19.** Columns represent infected and healthy conditions, rows represent drug tested including only drugs with known safety profiles, having completed phase II clinical trials (Supplementary Table 5). Showing the effect on: (a) Cell Death. (b) Fibrosis. (c) Host Protein Synthesis. (d) Inflammation. (e) Syncytia Formation. (f) T-cell Infiltration. (g) Viral Entry. (h) Viral Replication.

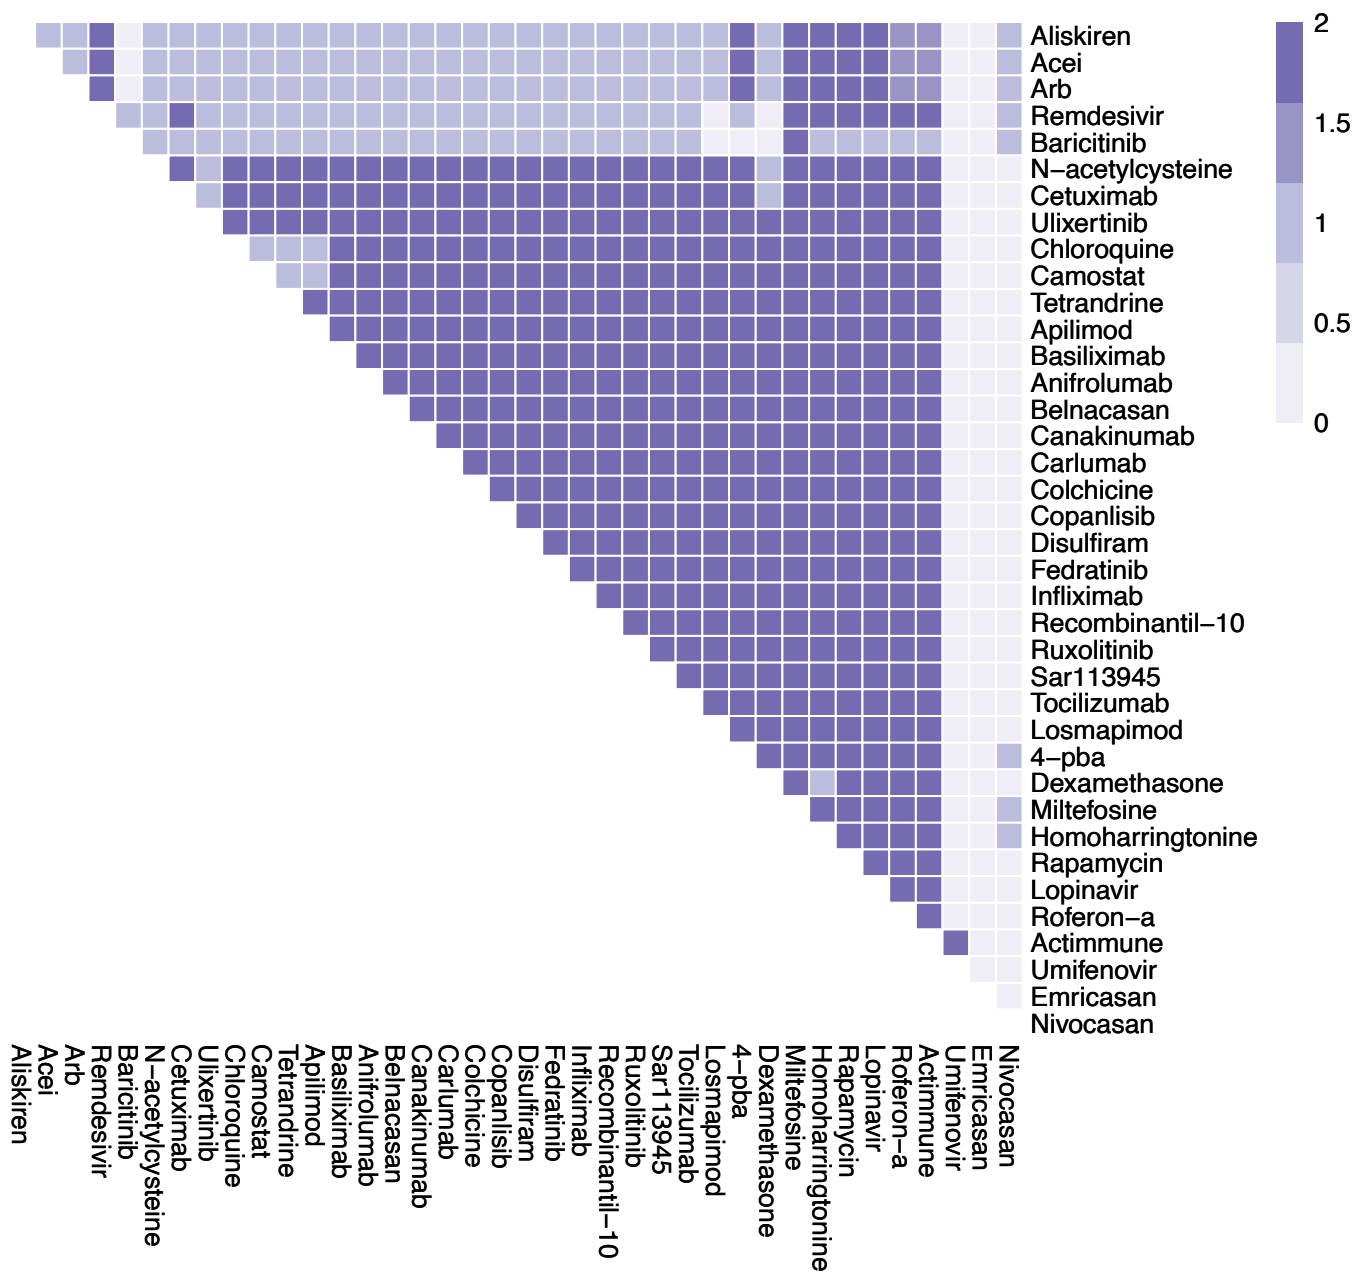

**Supplementary Figure 2i. Effects of combination therapy (38 drugs that have passed phase II trials) on Cell Death in mild COVID-19.** The colour of the square corresponds to the level of the *CellDeath* node at steady state under treatment by the drugs indicated on the x- and y-axis. The plot shows drugs with known safety profiles, having completed phase II clinical trials (Supplementary Table 5).

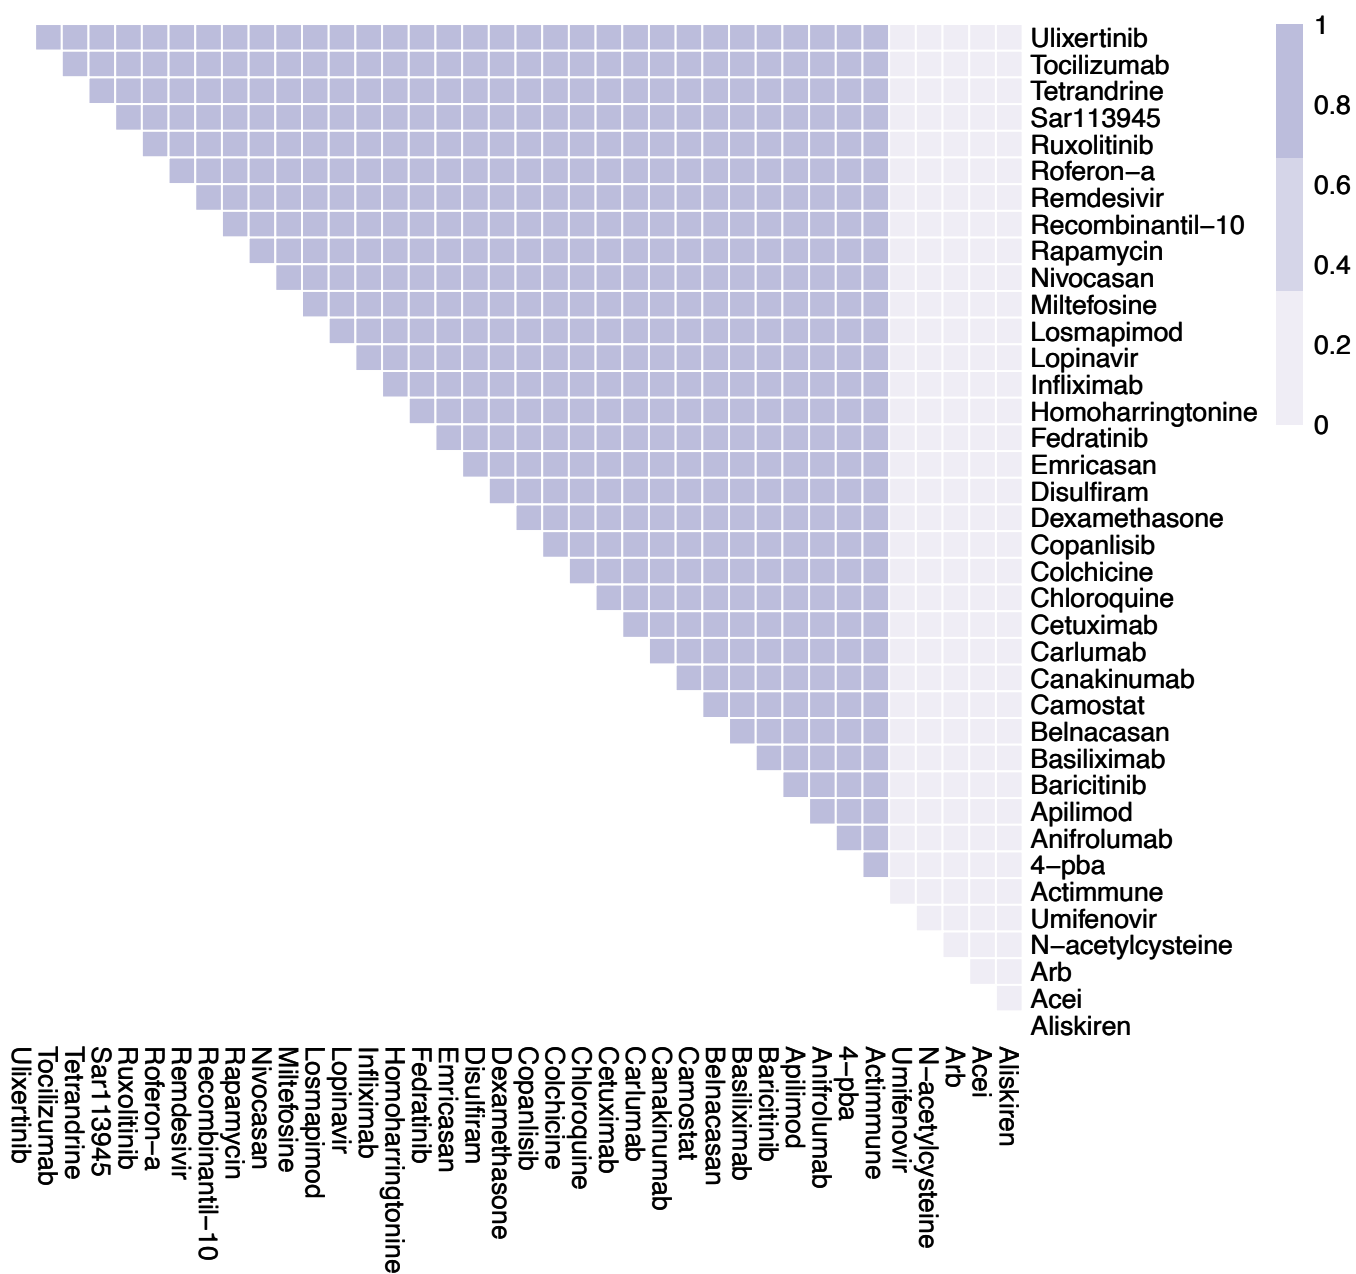

**Supplementary Figure 2j. Effects of combination therapy (38 drugs that have passed phase II trials) on Fibrosis in mild COVID-19.** The colour of the square corresponds to the level of the *Fibrosis* node at steady state under treatment by the drugs indicated on the x- and y-axis. The plot shows drugs with known safety profiles, having completed phase II clinical trials (Supplementary Table 5).



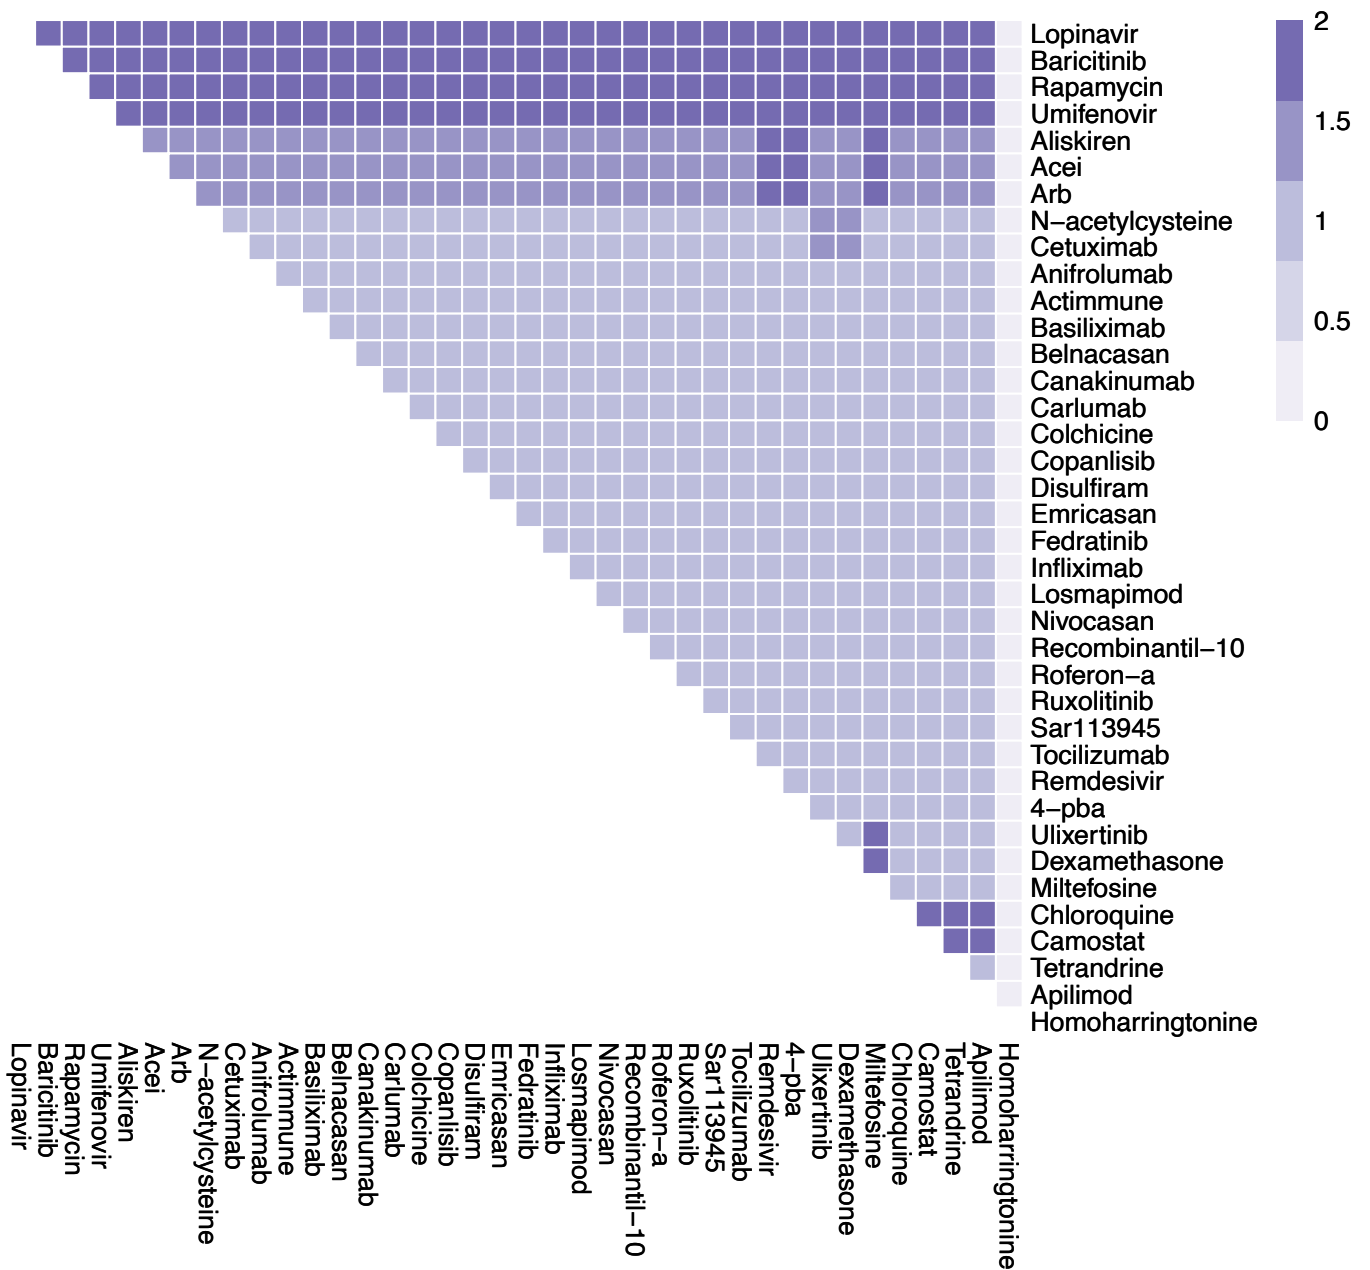

**Supplementary Figure 2k. Effects of combination therapy (38 drugs that have passed phase II trials) on Host Protein Synthesis in mild COVID-19.** The colour of the square corresponds to the level of the *HostProteinSynthesis* node at steady state under treatment by the drugs indicated on the x- and y-axis. The plot shows drugs with known safety profiles, having completed phase II clinical trials (Supplementary Table 5).

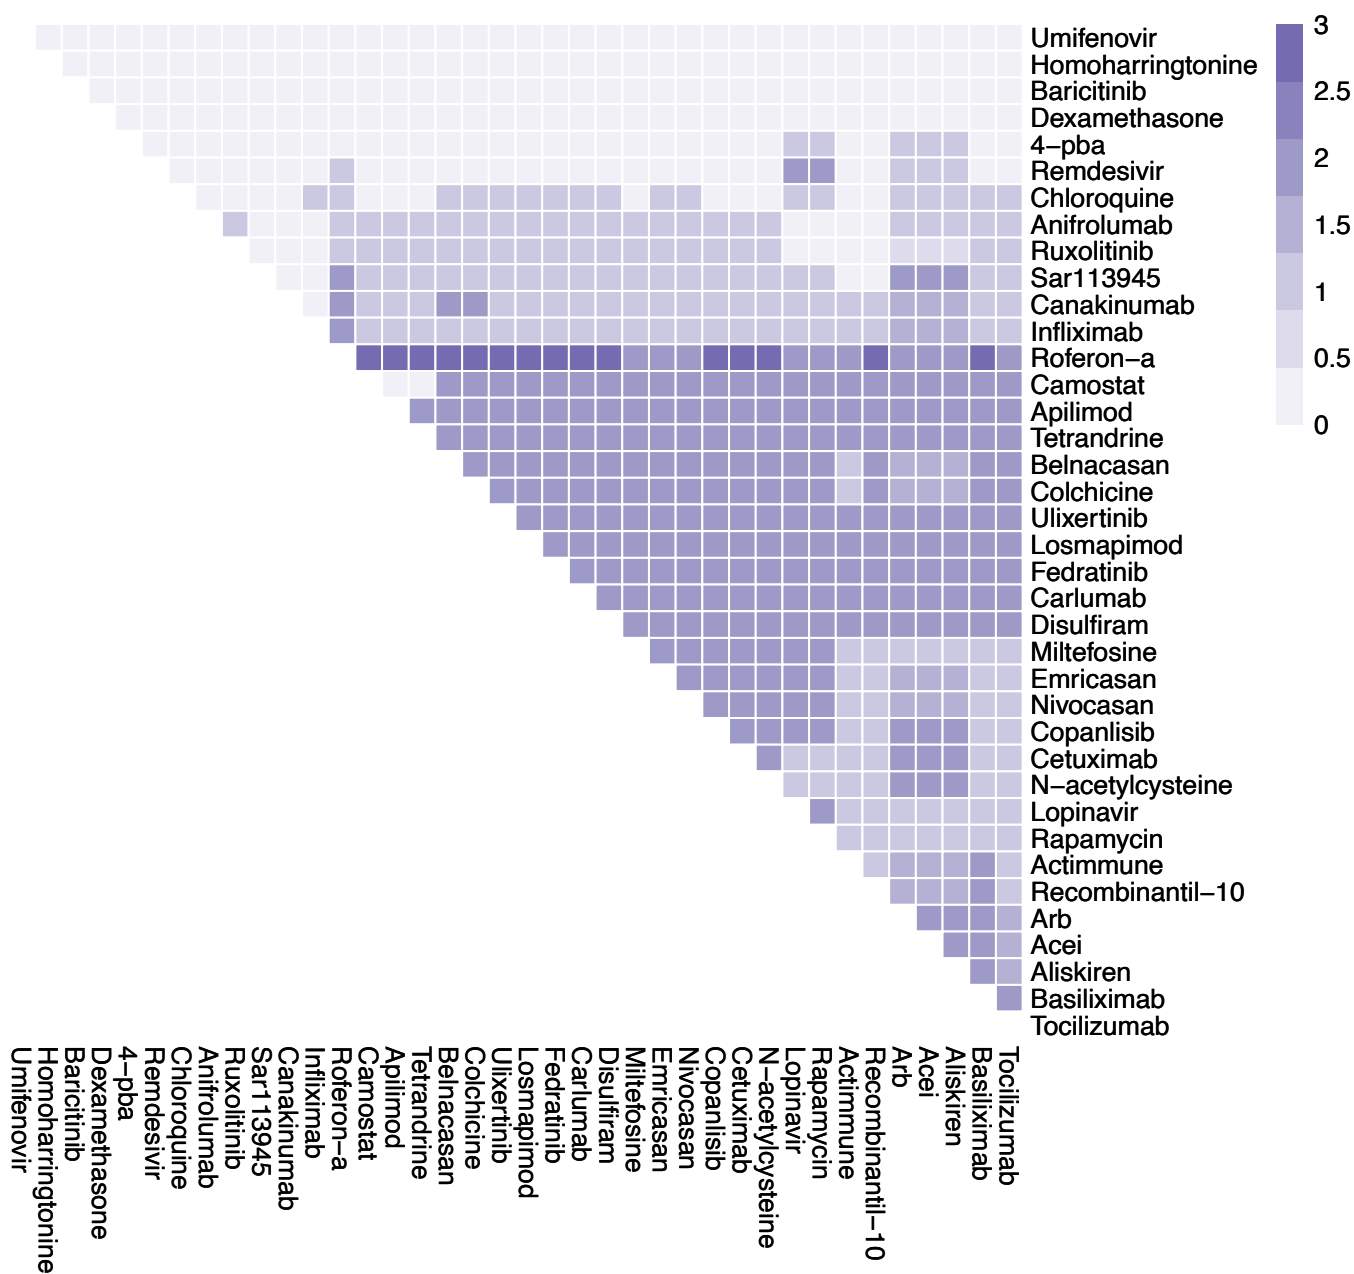

**Supplementary Figure 2I. Effects of combination therapy (38 drugs that have passed phase II trials) on Inflammation in mild COVID-19.** The colour of the square corresponds to the level of the *Inflammation* node at steady state under treatment by the drugs indicated on the x- and y-axis. The plot shows drugs with known safety profiles, having completed phase II clinical trials (Supplementary Table 5).

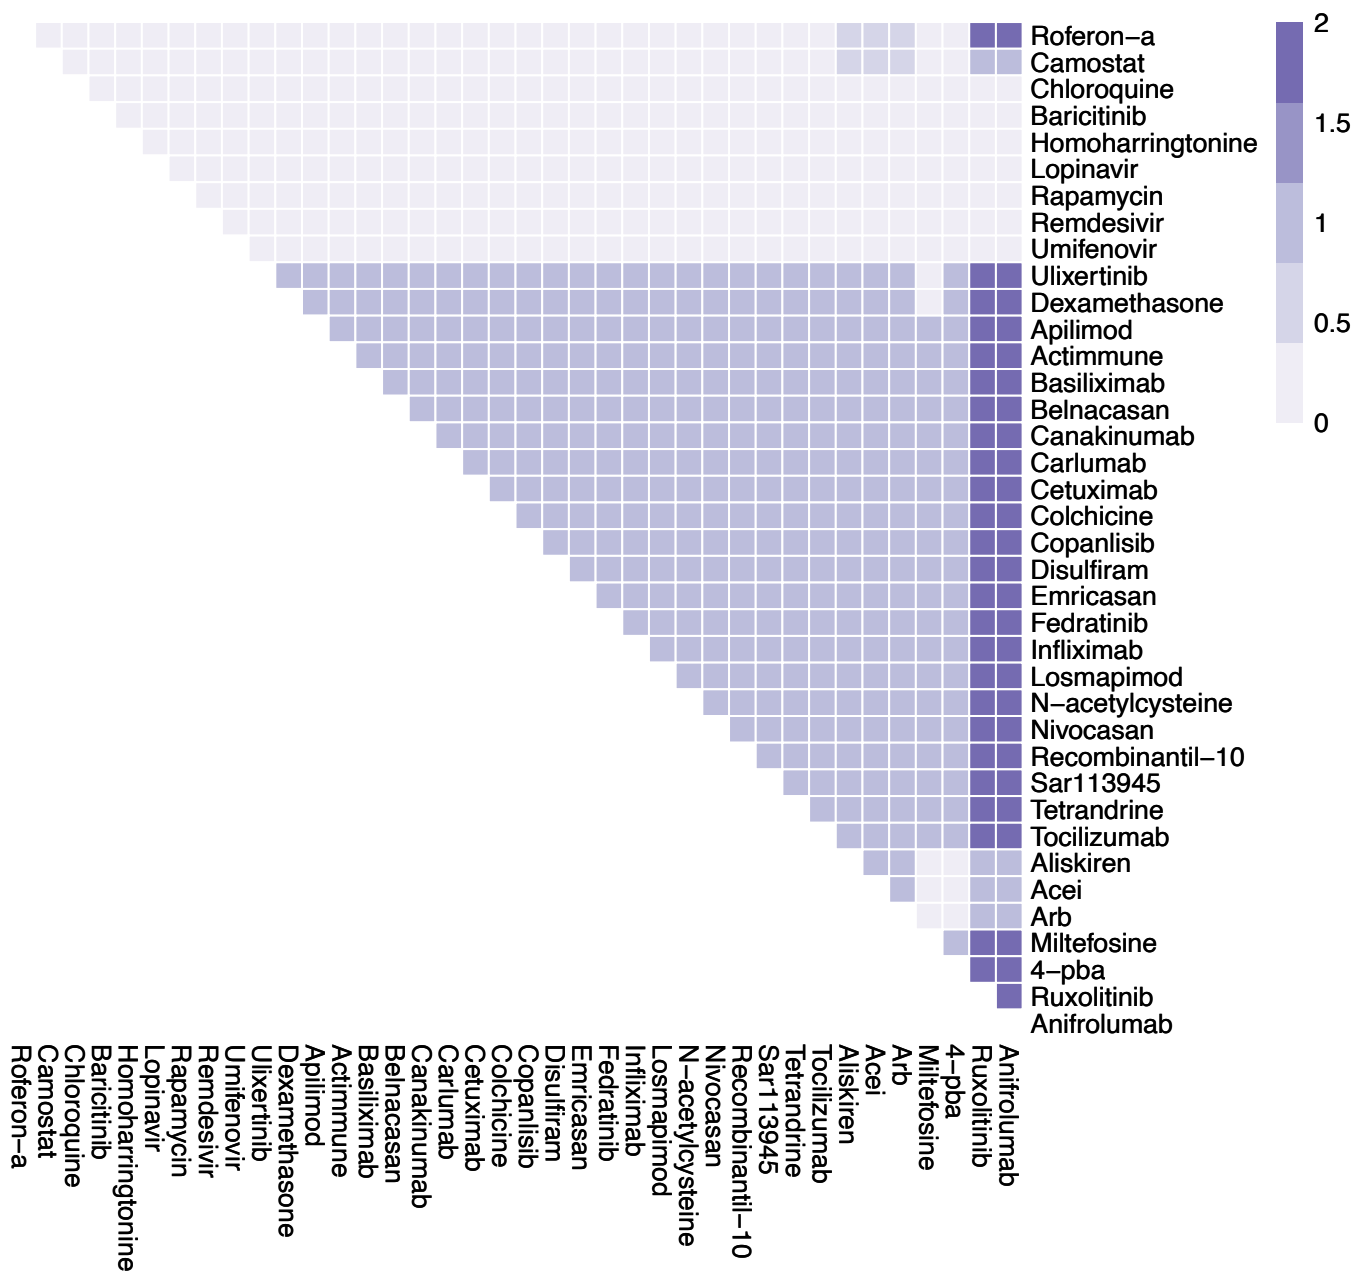

**Supplementary Figure 2m. Effects of combination therapy (38 drugs that have passed phase II trials) on Syncytia Formation in mild COVID-19.** The colour of the square corresponds to the level of the *SyncytiaFormation* node at steady state under treatment by the drugs indicated on the x- and y-axis. The plot shows drugs with known safety profiles, having completed phase II clinical trials (Supplementary Table 5).

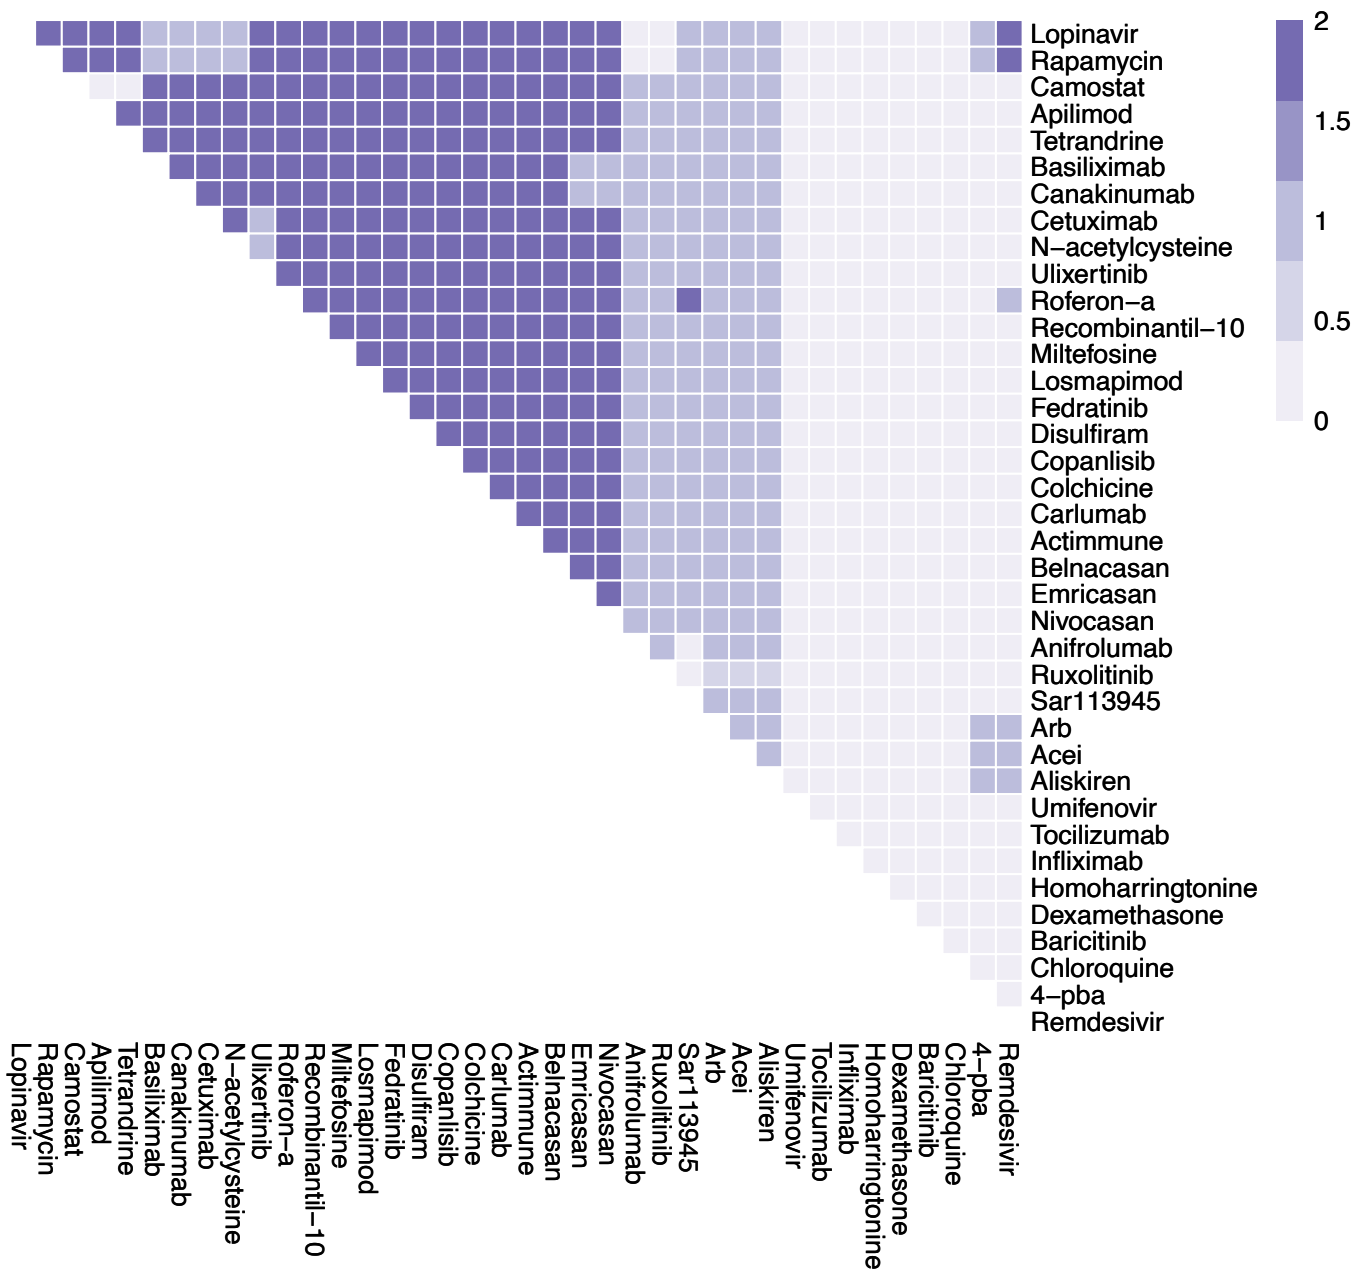

**Supplementary Figure 2n. Effects of combination therapy (38 drugs that have passed phase II trials) on T-cell Infiltration in mild COVID-19.** The colour of the square corresponds to the level of the *T-cellInfiltration* node at steady state under treatment by the drugs indicated on the x- and y-axis. The plot shows drugs with known safety profiles, having completed phase II clinical trials (Supplementary Table 5).

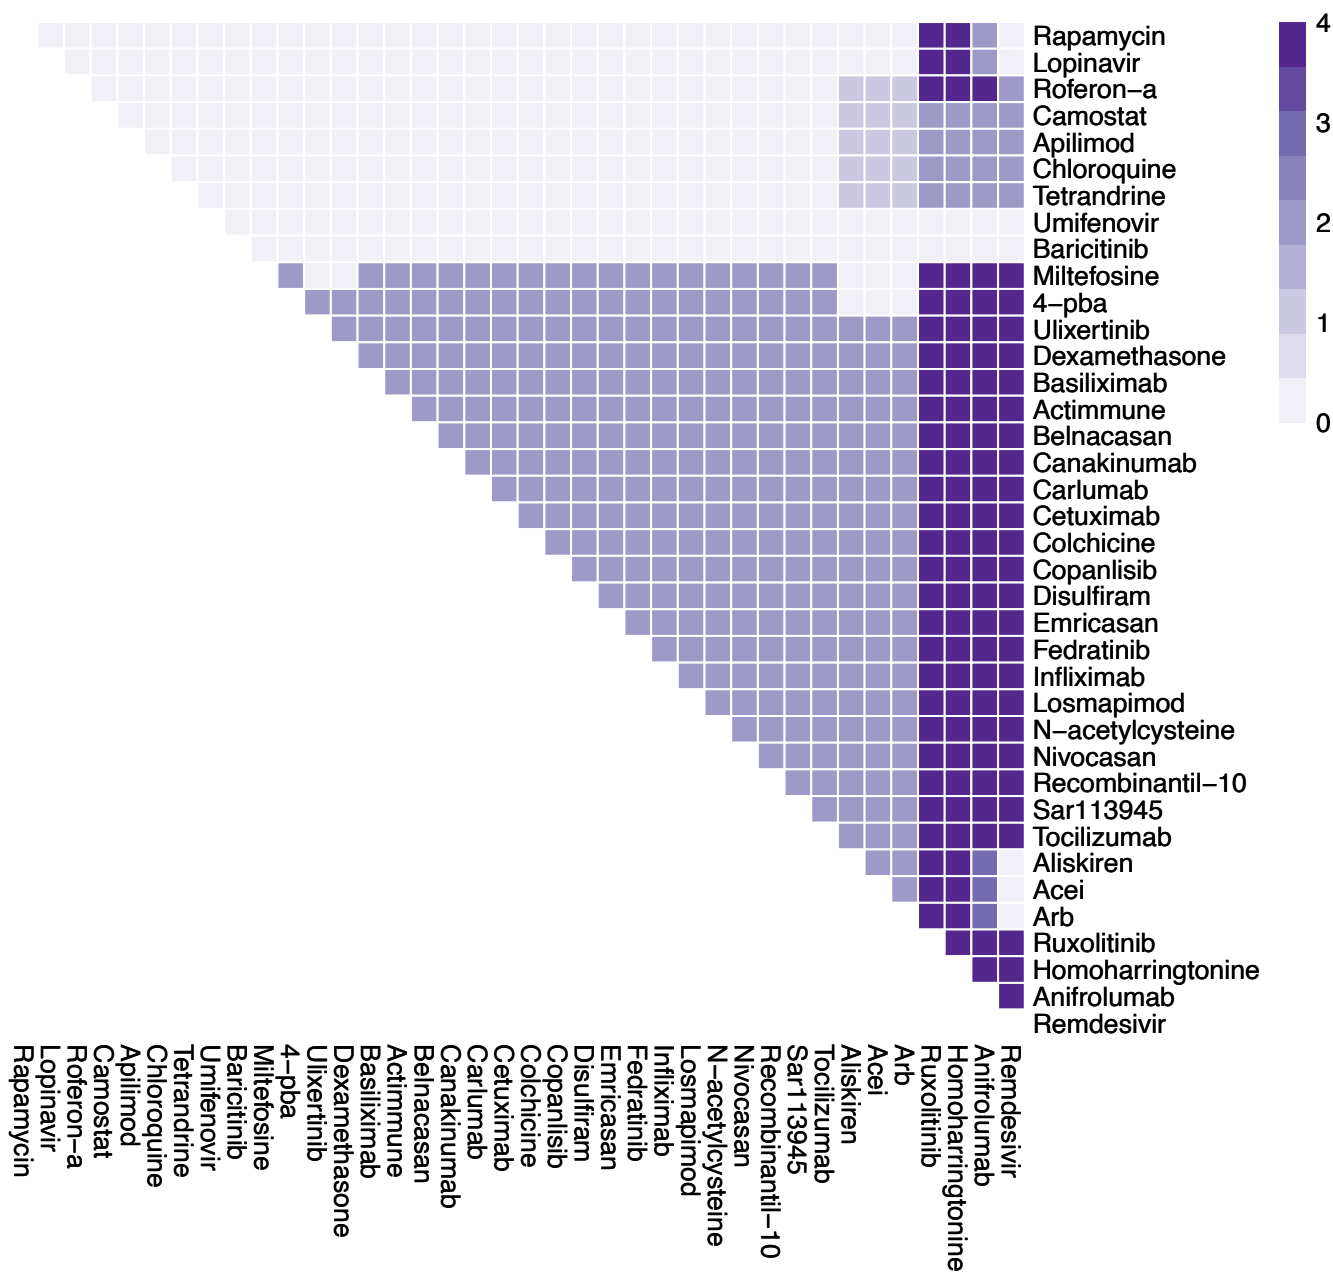

**Supplementary Figure 2o. Effects of combination therapy (38 drugs that have passed phase II trials) on Viral Entry in mild COVID-19.** The colour of the square corresponds to the level of the *ViralEntry* node at steady state under treatment by the drugs indicated on the x- and y-axis. The plot shows drugs with known safety profiles, having completed phase II clinical trials (Supplementary Table 5).

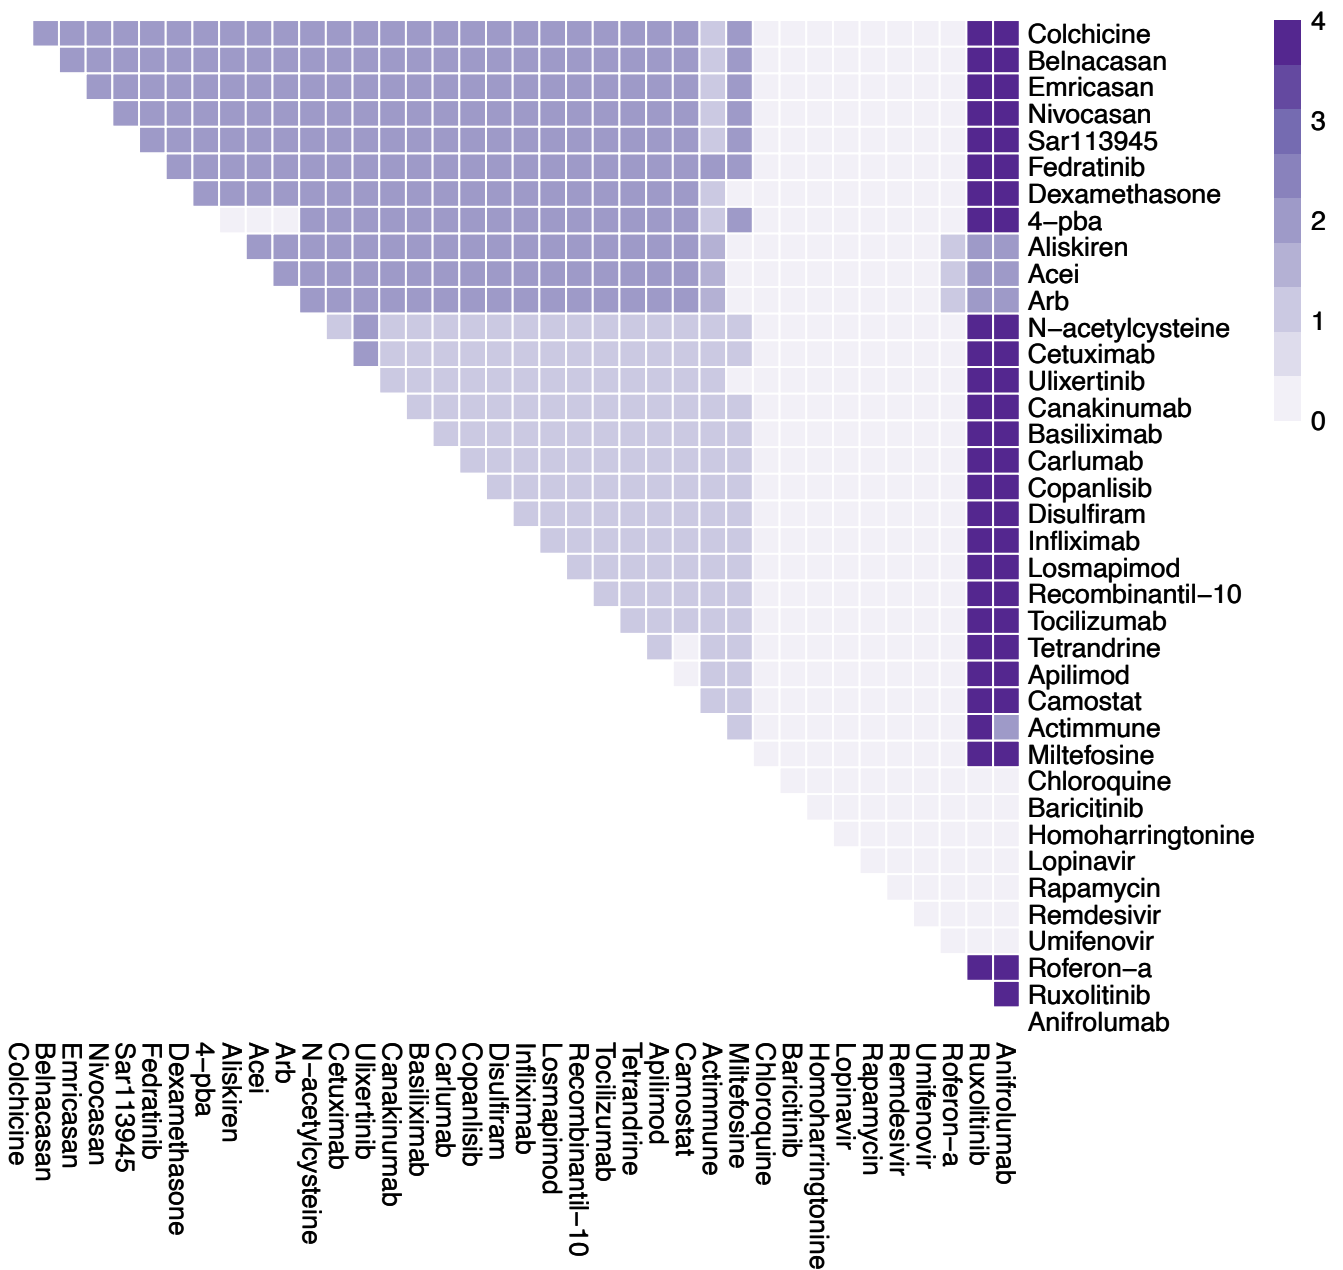

**Supplementary Figure 2p. Effects of combination therapy (38 drugs that have passed phase II trials) on Viral Replication in mild COVID-19.** The colour of the square corresponds to the level of the *ViralReplication* node at steady state under treatment by the drugs indicated on the x- and y-axis. The plot shows drugs with known safety profiles, having completed phase II clinical trials (Supplementary Table 5).

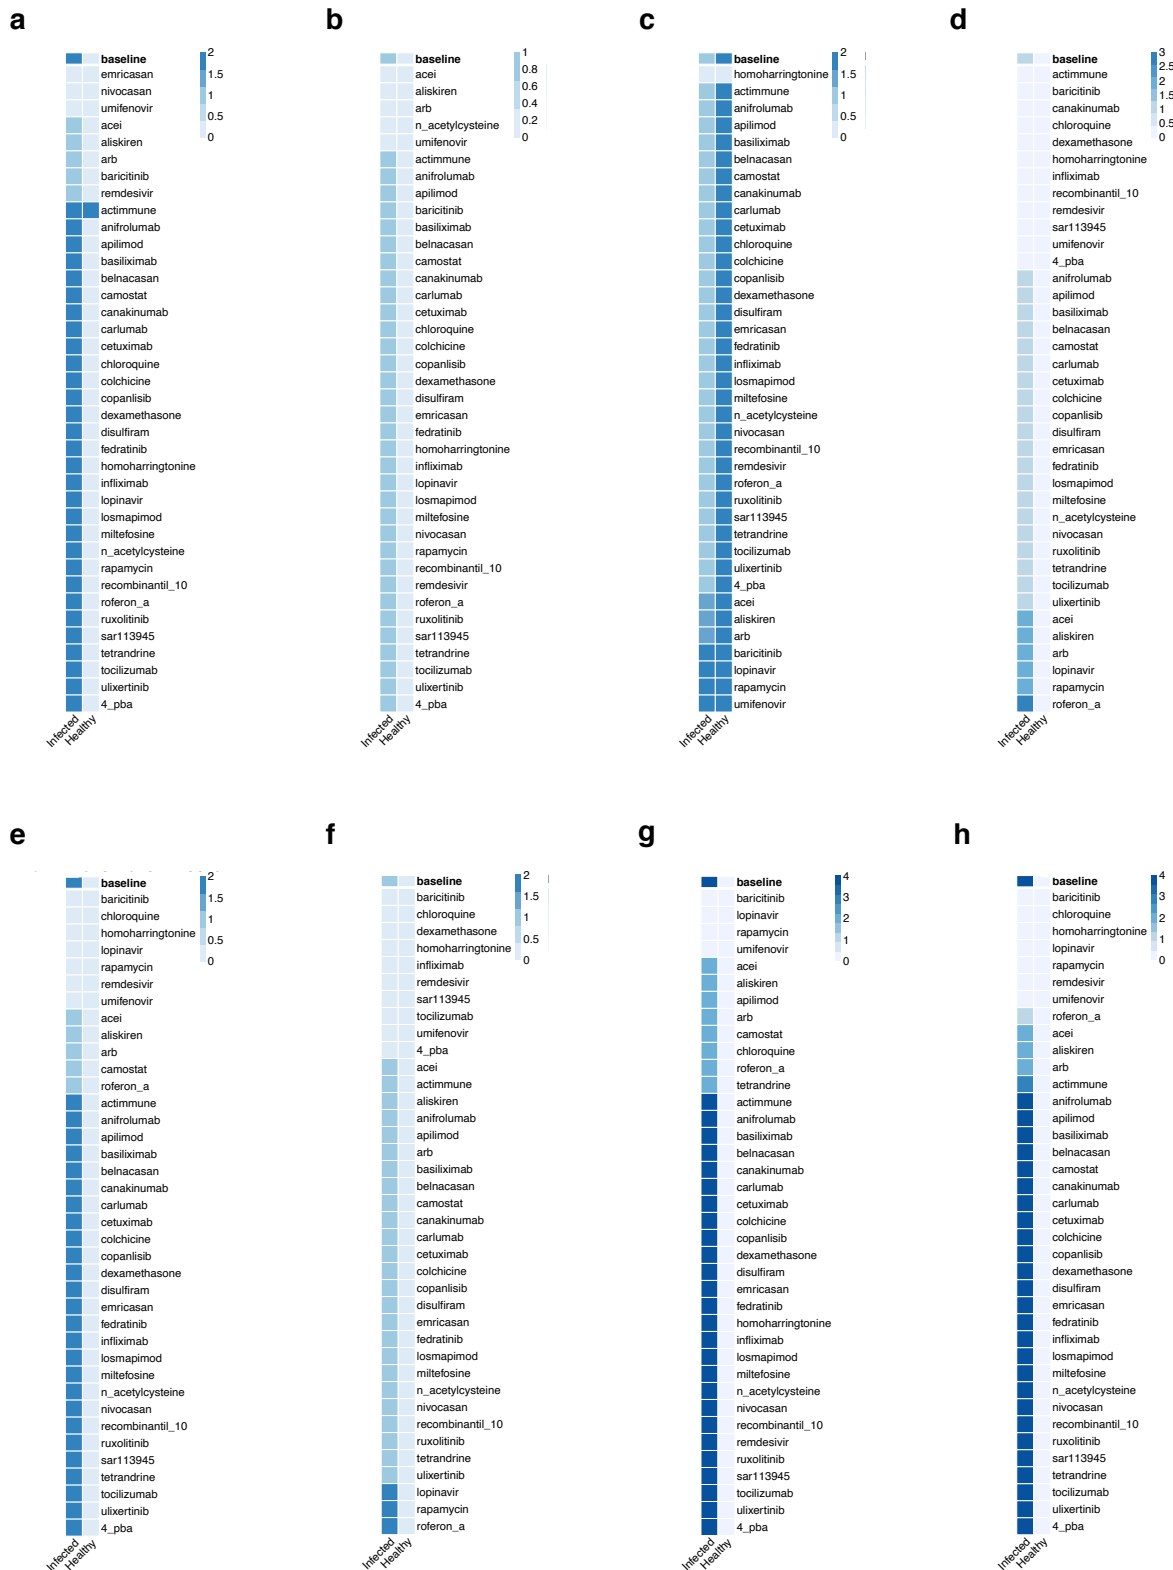

**Supplementary Figure 3 a-h. Effects of single therapies (38 drugs that have passed phase II trials) in early stage severe COVID-19.** Columns represent infected and healthy conditions, rows represent drug tested including only drugs with known safety profiles, having completed phase II clinical trials (Supplementary Table 5). Showing the effect on: **(a)** Cell Death. **(b)** Fibrosis. **(c)** Host Protein Synthesis. **(d)** Inflammation. **(e)** Syncytia Formation. **(f)** T-cell Infiltration. **(g)** Viral Entry. **(h)** Viral Replication.

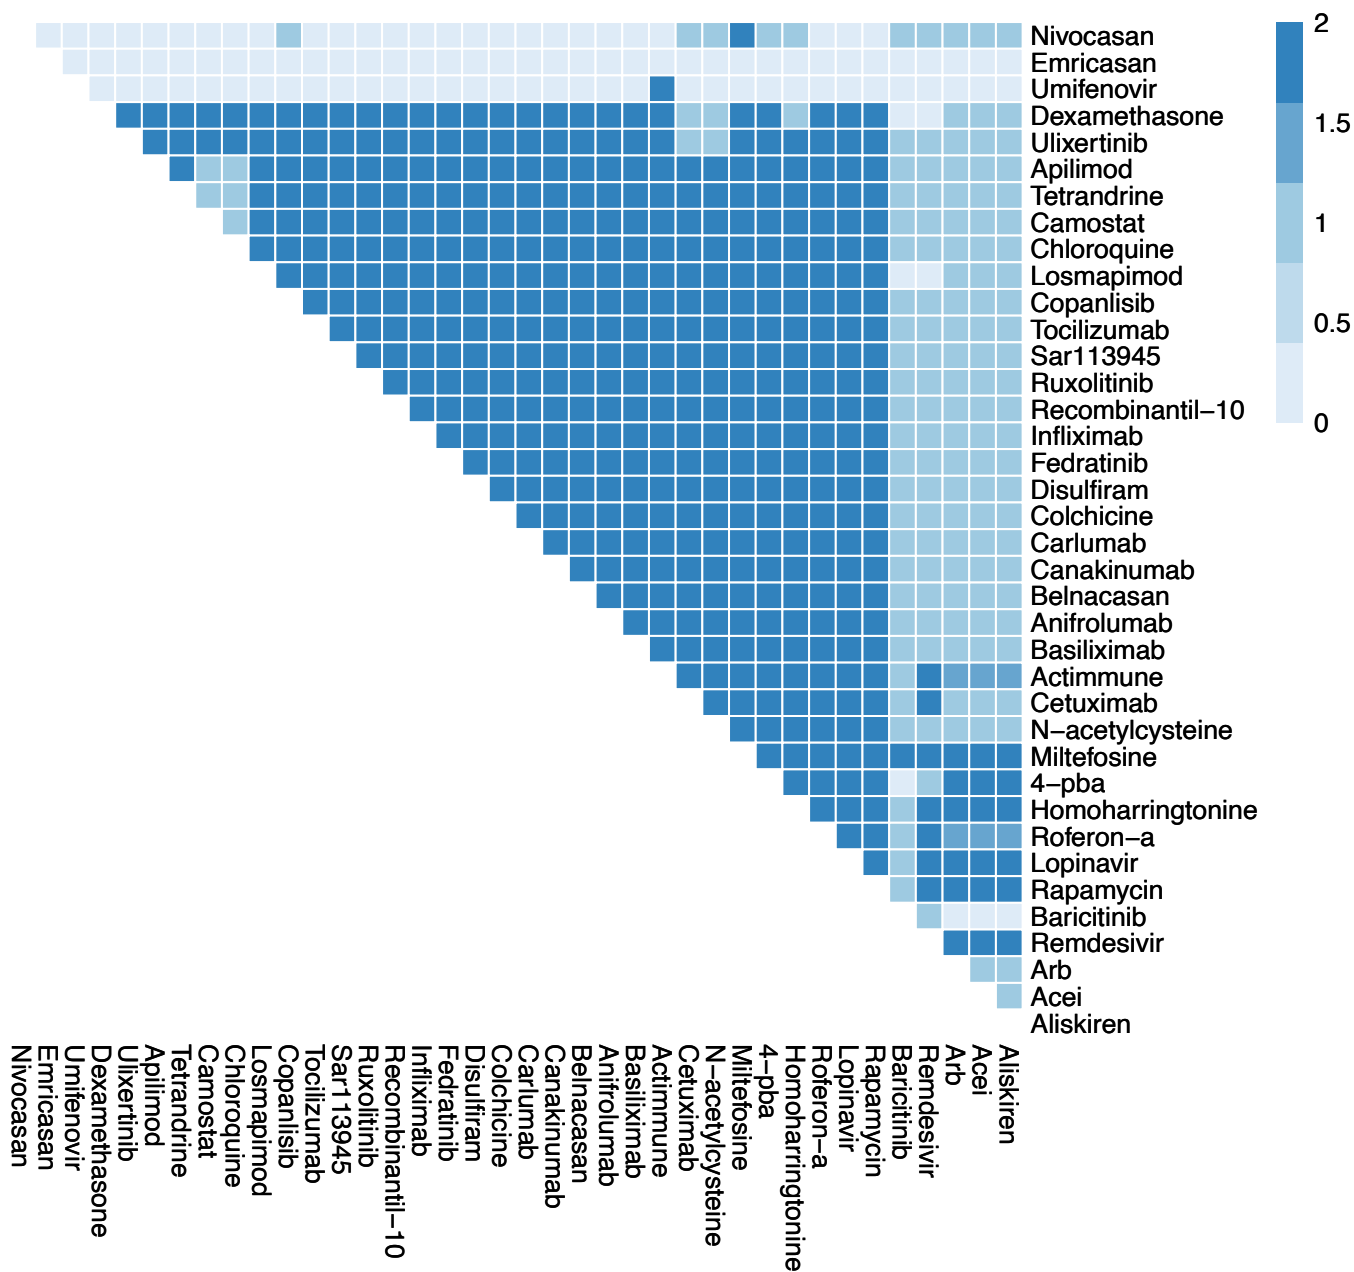

**Supplementary Figure 3i. Effects of combination therapy (38 drugs that have passed phase II trials) on Cell Death in early stage, severe COVID-19.** The colour of the square corresponds to the level of the *CellDeath* node at steady state under treatment by the drugs indicated on the x- and y-axis. The plot shows drugs with known safety profiles, having completed phase II clinical trials (Supplementary Table 5).



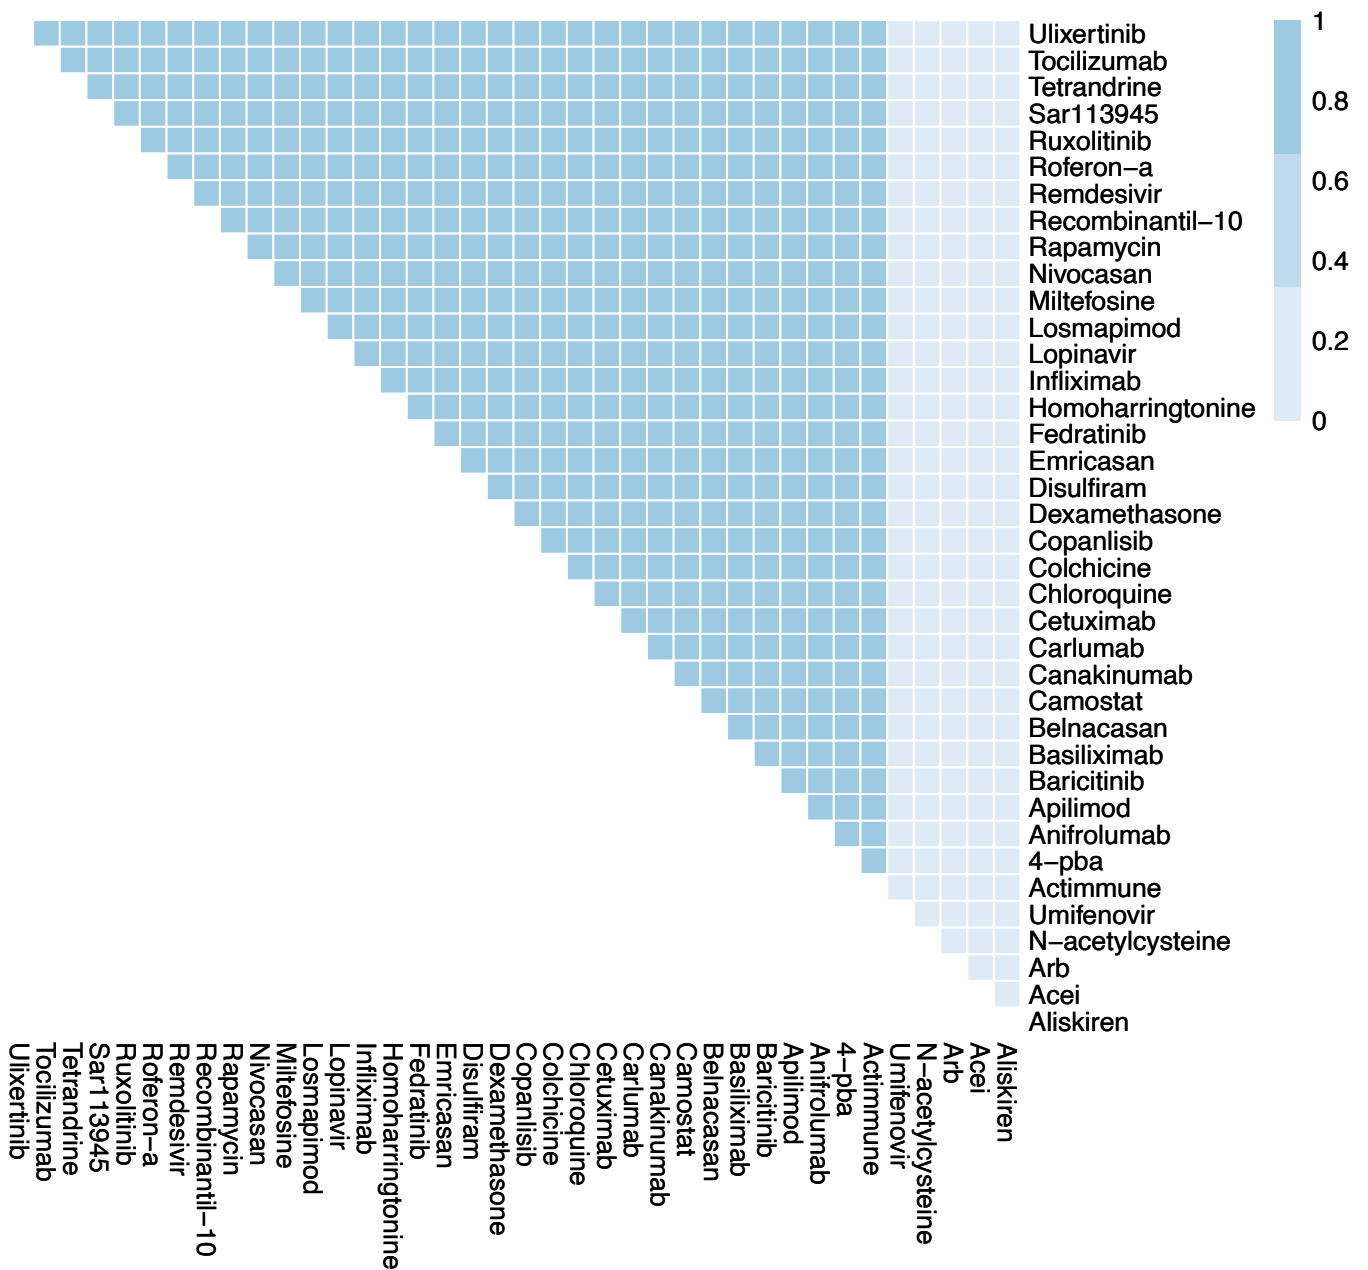

**Supplementary Figure 3j. Effects of combination therapy (38 drugs that have passed phase II trials) on Fibrosis in early stage, severe COVID-19.** The colour of the square corresponds to the level of the *Fibrosis* node at steady state under treatment by the drugs indicated on the x- and y-axis. The plot shows drugs with known safety profiles, having completed phase II clinical trials (Supplementary Table 5).

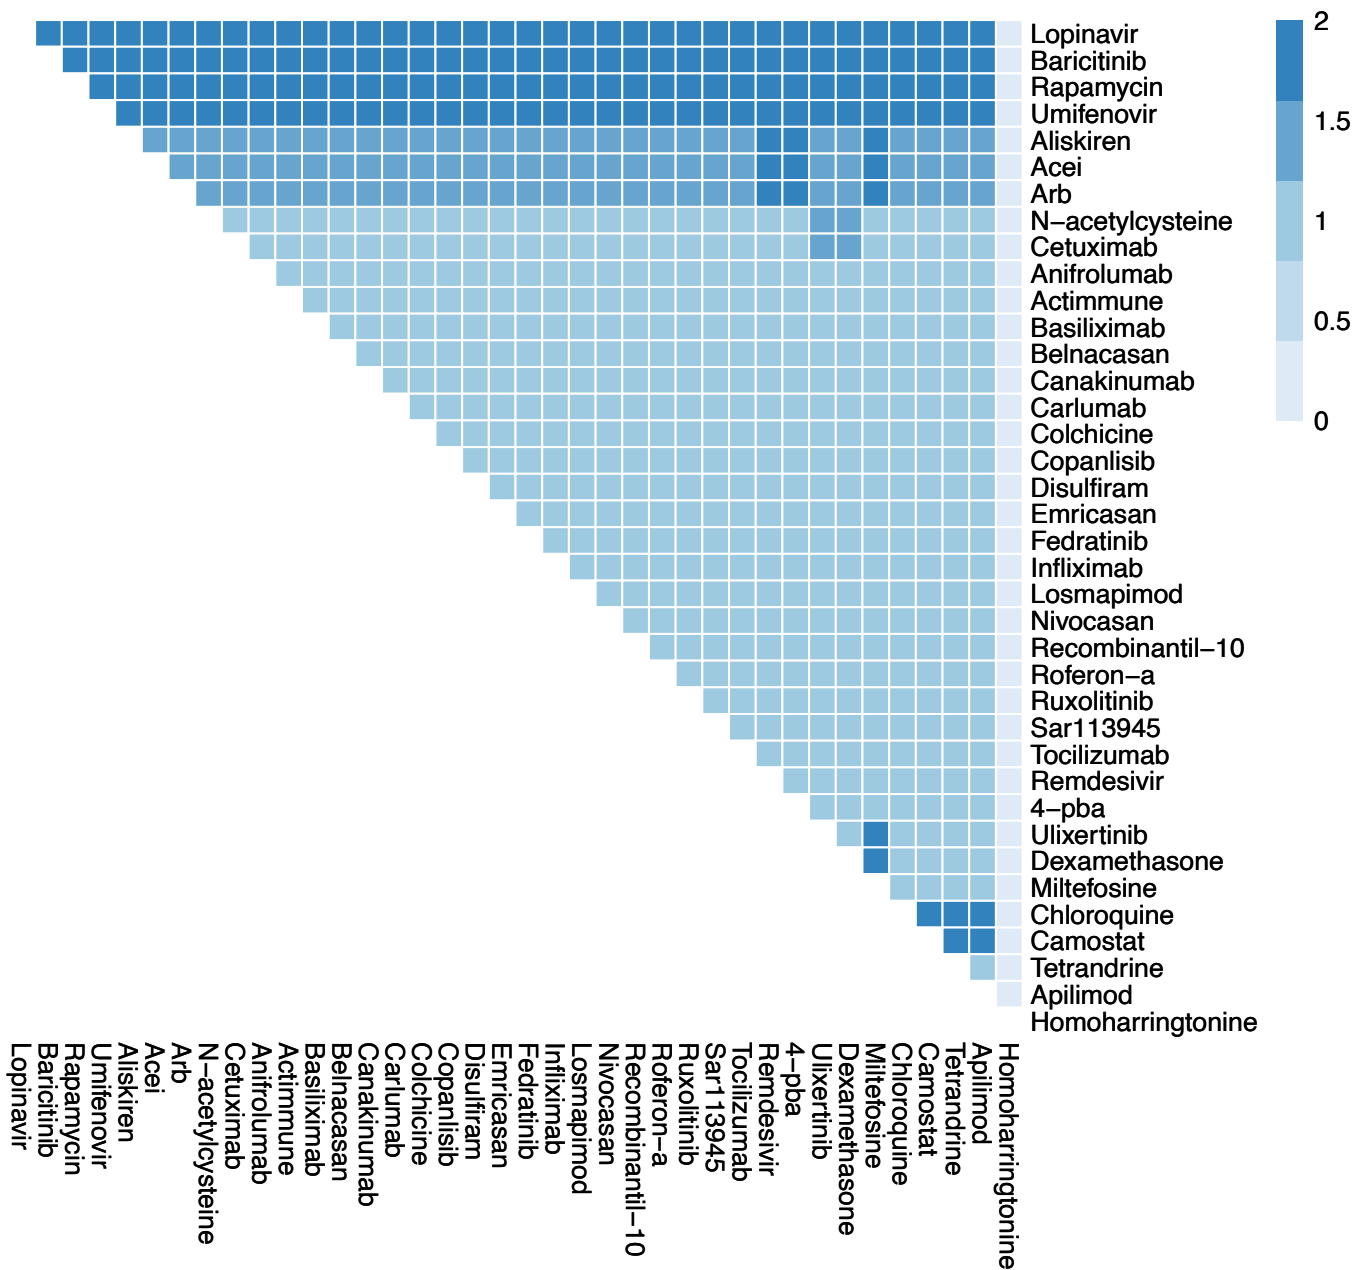

**Supplementary Figure 3k. Effects of combination therapy (38 drugs that have passed phase II trials) on Host Protein Synthesis in early stage, severe COVID-19.** The colour of the square corresponds to the level of the *HostProteinSynthesis* node at steady state under treatment by the drugs indicated on the x- and y-axis. The plot shows drugs with known safety profiles, having completed phase II clinical trials (Supplementary Table 5).

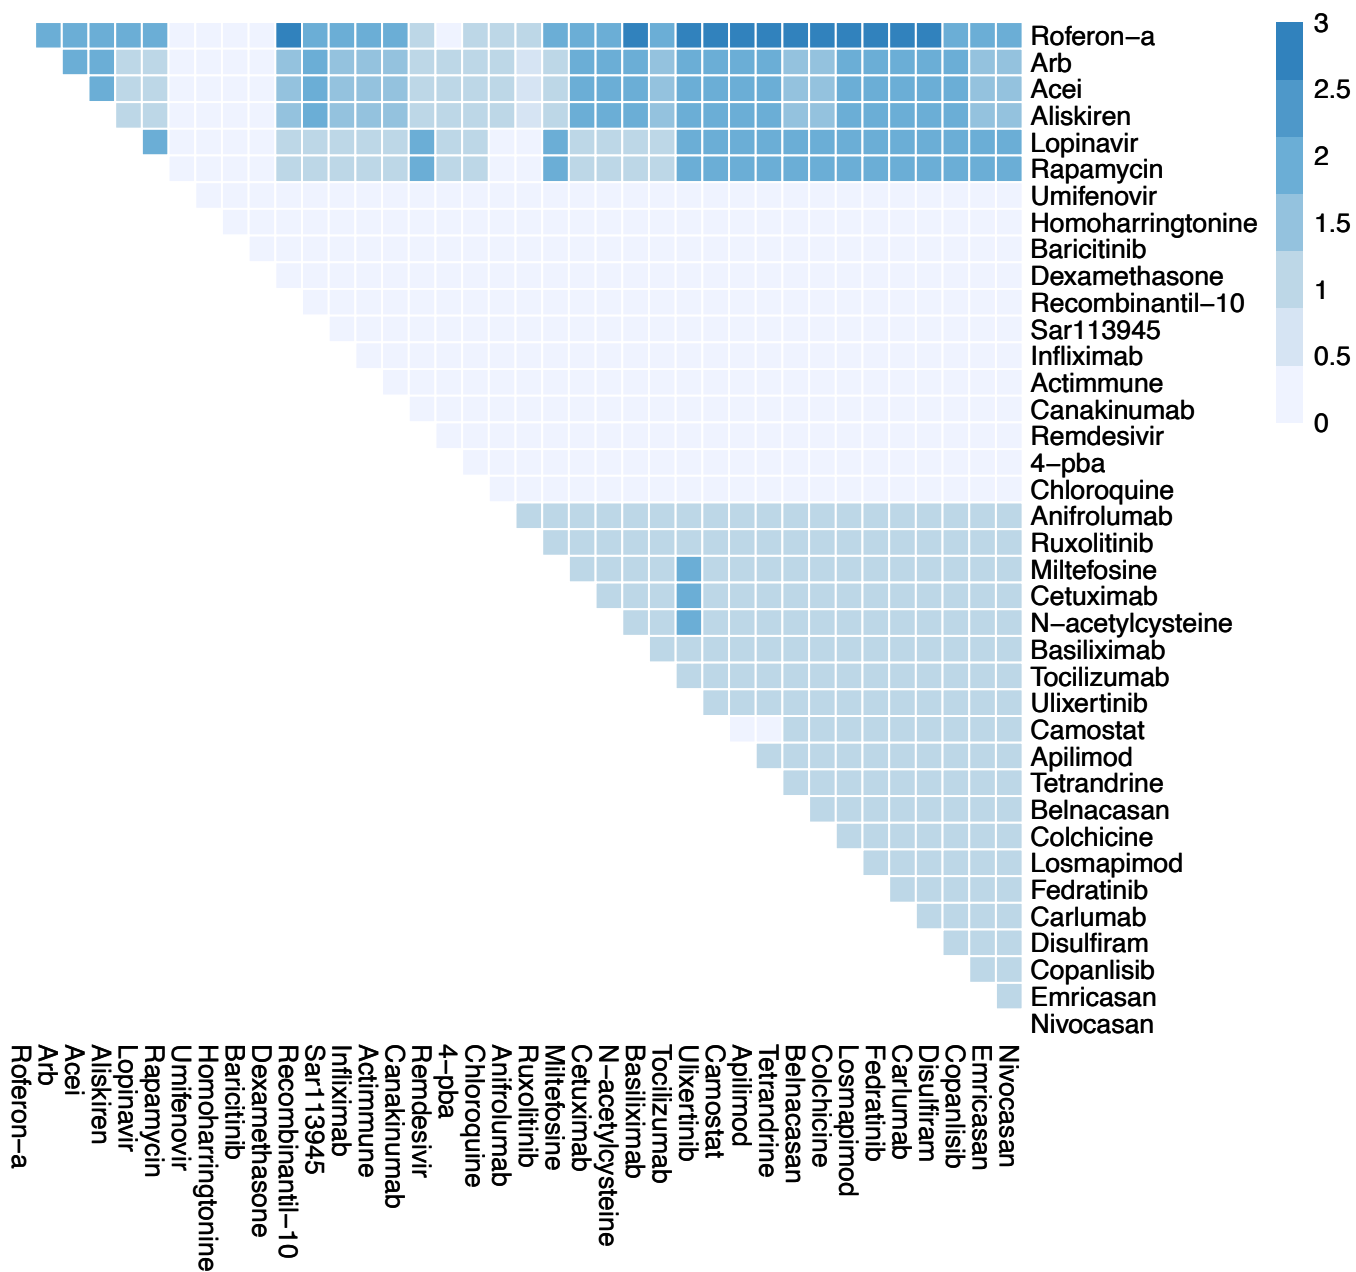

**Supplementary Figure 3I. Effects of combination therapy (38 drugs that have passed phase II trials) on Inflammation in early stage, severe COVID-19.** The colour of the square corresponds to the level of the *Inflammation* node at steady state under treatment by the drugs indicated on the x- and y-axis. The plot shows drugs with known safety profiles, having completed phase II clinical trials (Supplementary Table 5).

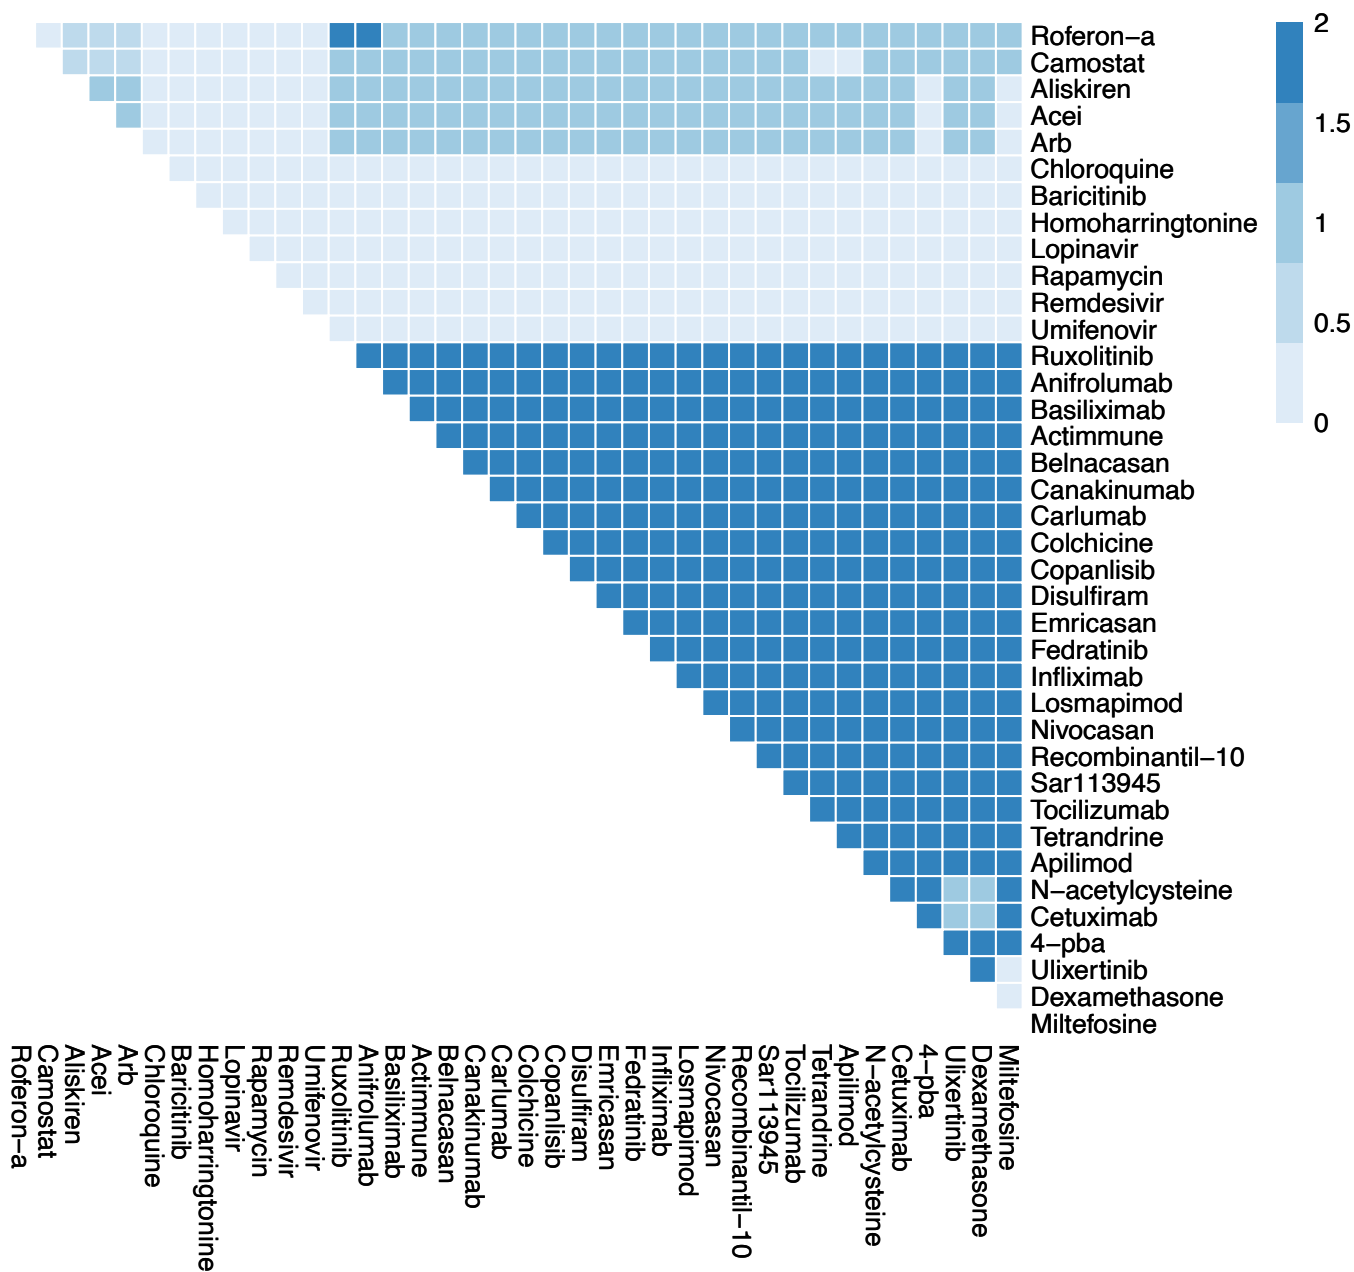

**Supplementary Figure 3m. Effects of combination therapy (38 drugs that have passed phase II trials) on Syncytia Formation in early stage, severe COVID-19.** The colour of the square corresponds to the level of the *SyncytiaFormation* node at steady state under treatment by the drugs indicated on the x- and y-axis. The plot shows drugs with known safety profiles, having completed phase II clinical trials (Supplementary Table 5).

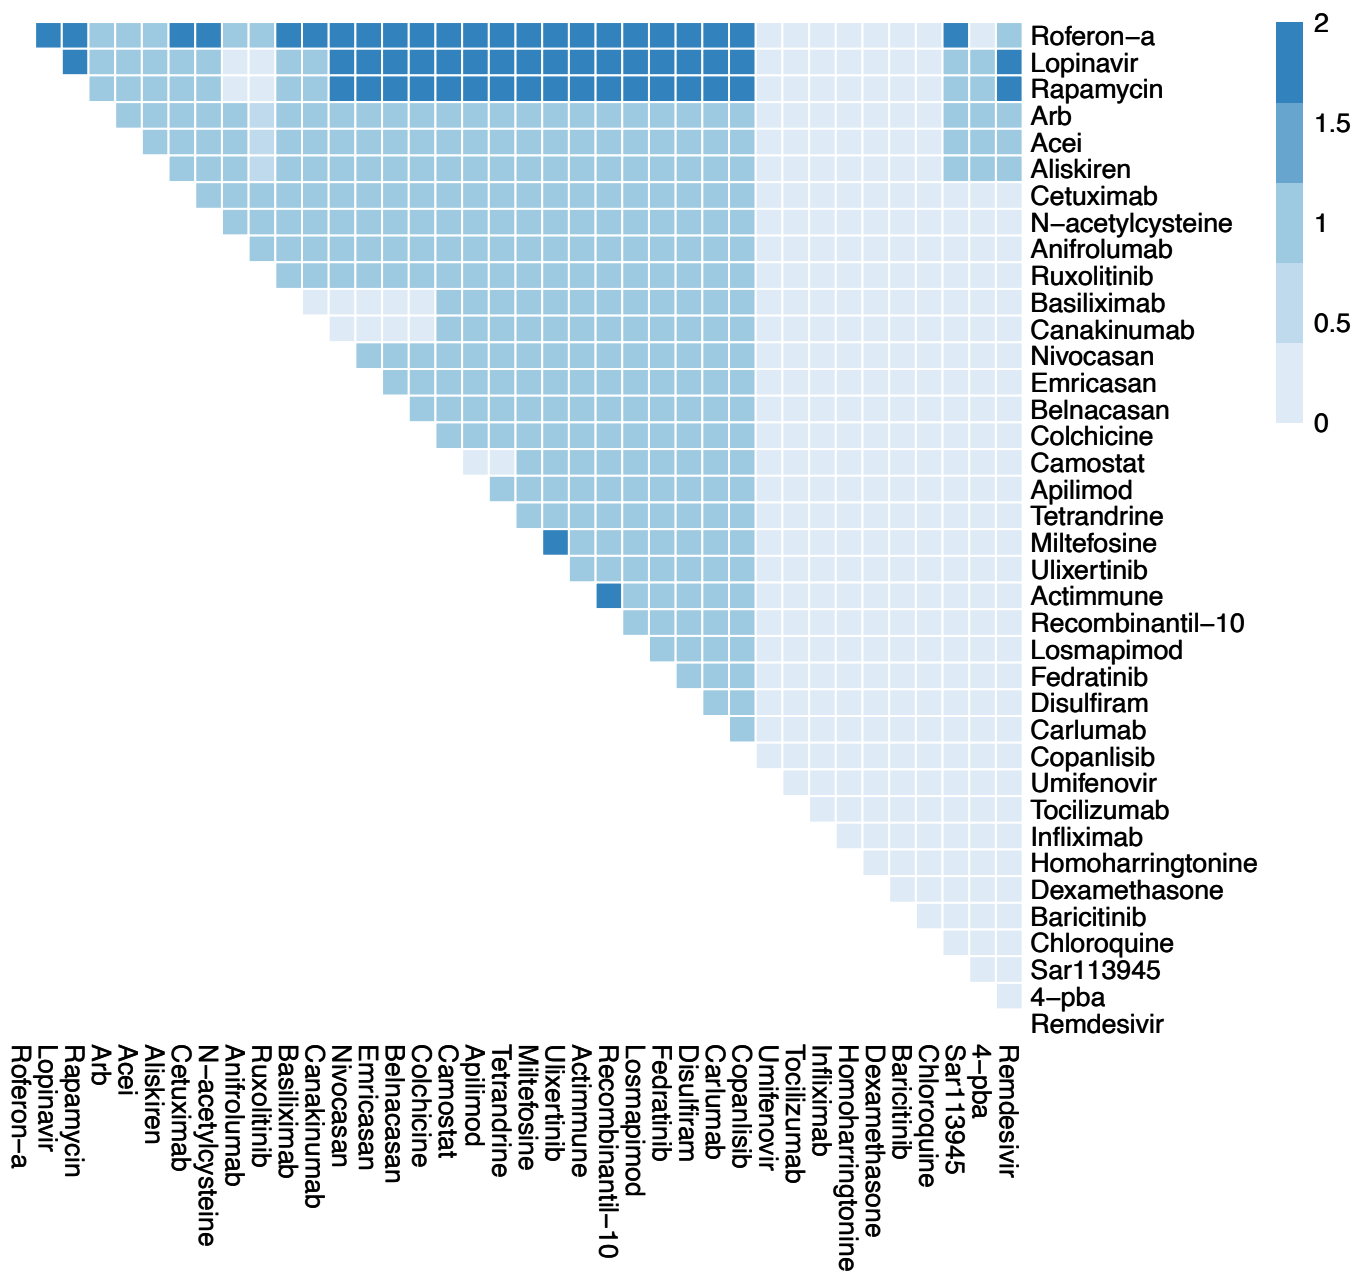

**Supplementary Figure 3n. Effects of combination therapy (38 drugs that have passed phase II trials) on T-cell Infiltration in early stage, severe COVID-19.** The colour of the square corresponds to the level of the *T-cellInfiltration* node at steady state under treatment by the drugs indicated on the x- and y-axis. The plot shows drugs with known safety profiles, having completed phase II clinical trials (Supplementary Table 5).

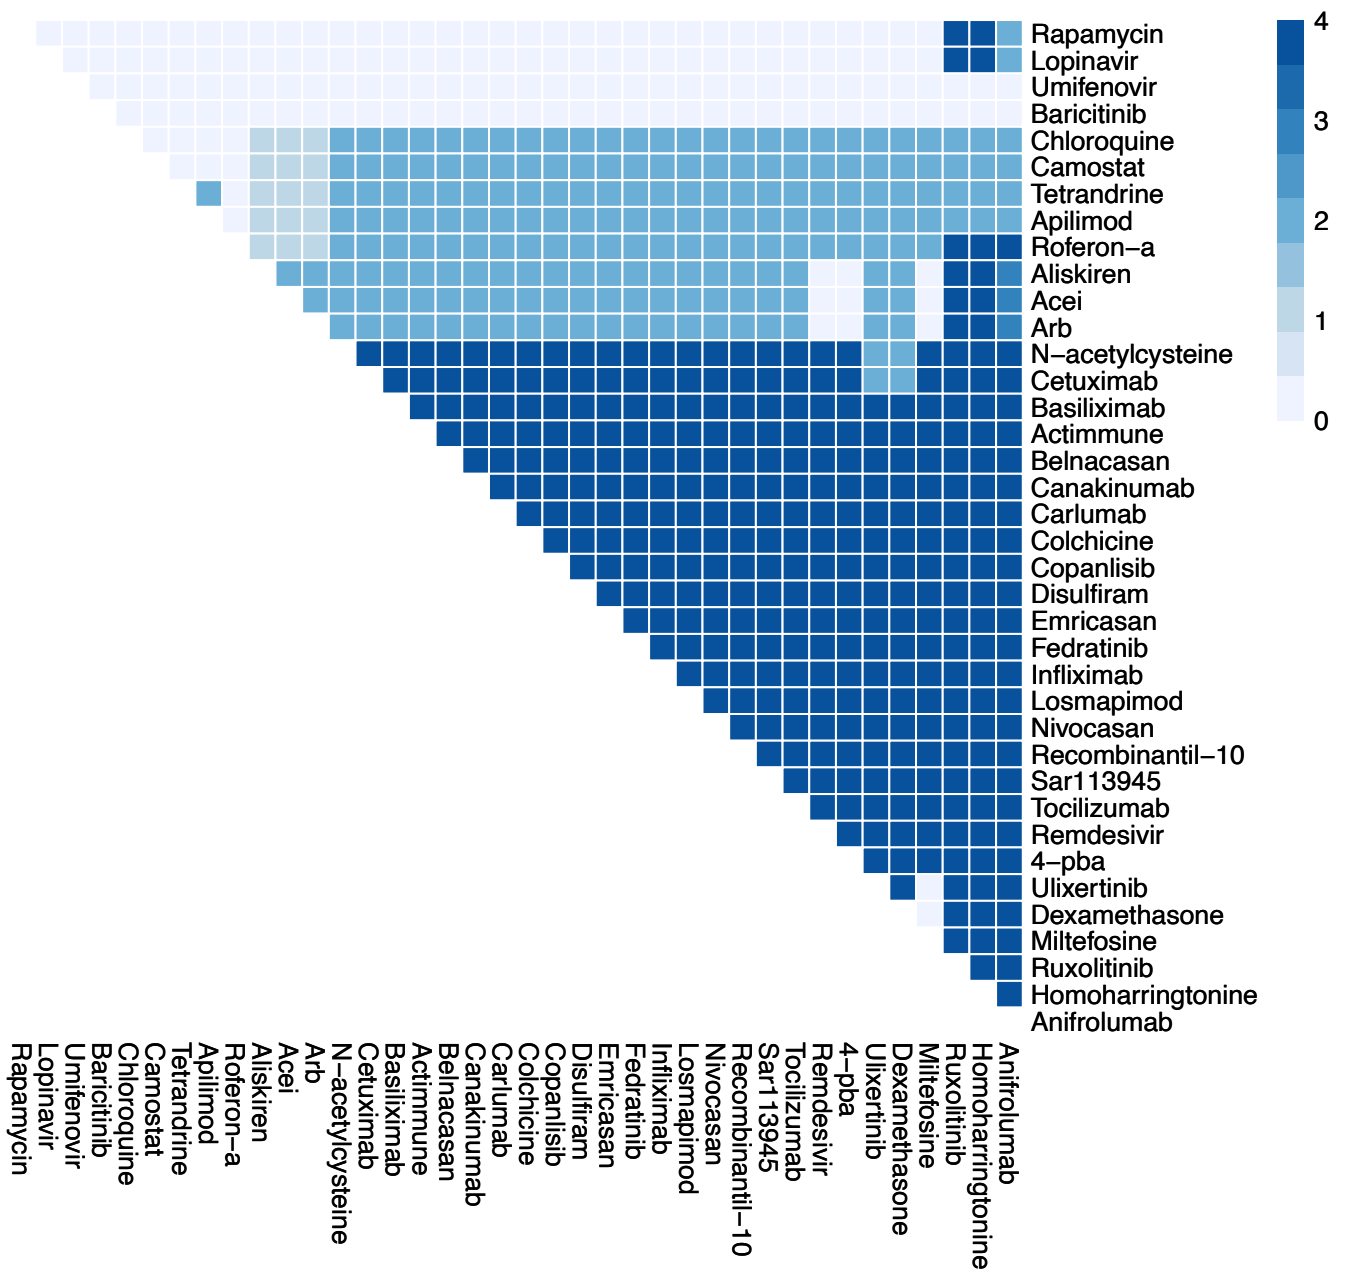

**Supplementary Figure 3o. Effects of combination therapy (38 drugs that have passed phase II trials) on Viral Entry in early stage, severe COVID-19.** The colour of the square corresponds to the level of the *ViralEntry* node at steady state under treatment by the drugs indicated on the x- and y-axis. The plot shows drugs with known safety profiles, having completed phase II clinical trials (Supplementary Table 5).

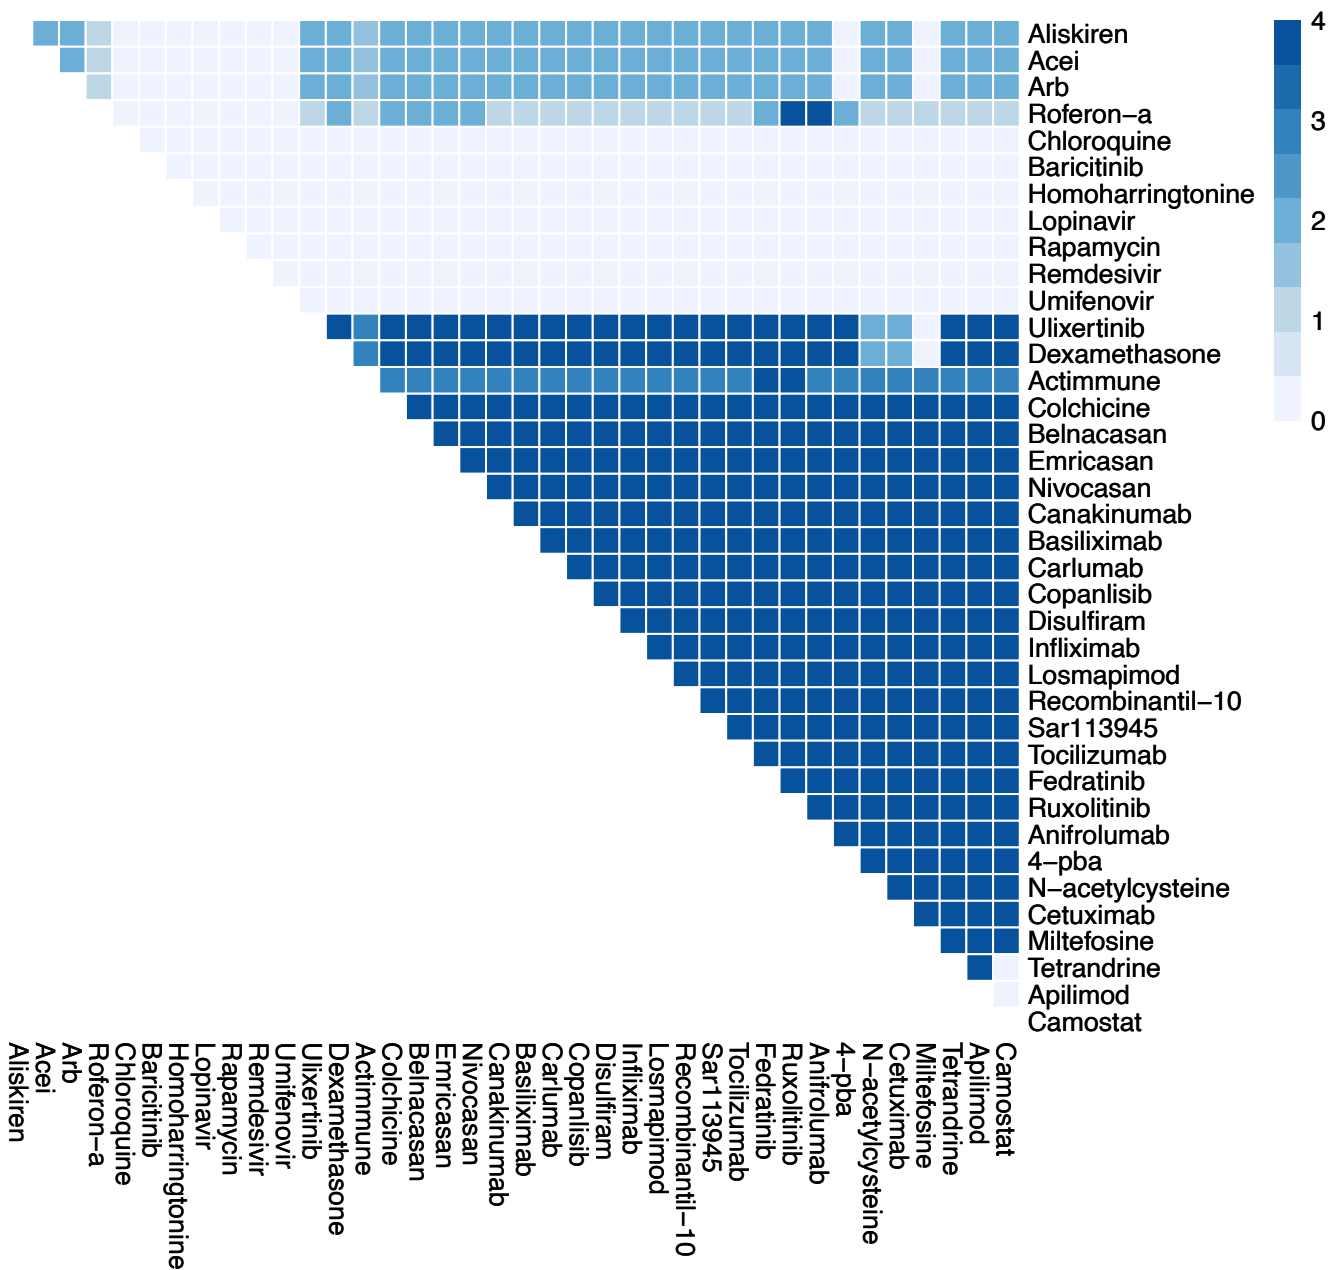

**Supplementary Figure 3p. Effects of combination therapy (38 drugs that have passed phase II trials) on Viral Replication in early stage, severe COVID-19.** The colour of the square corresponds to the level of the *ViralReplication* node at steady state under treatment by the drugs indicated on the x- and y-axis. The plot shows drugs with known safety profiles, having completed phase II clinical trials (Supplementary Table 5).

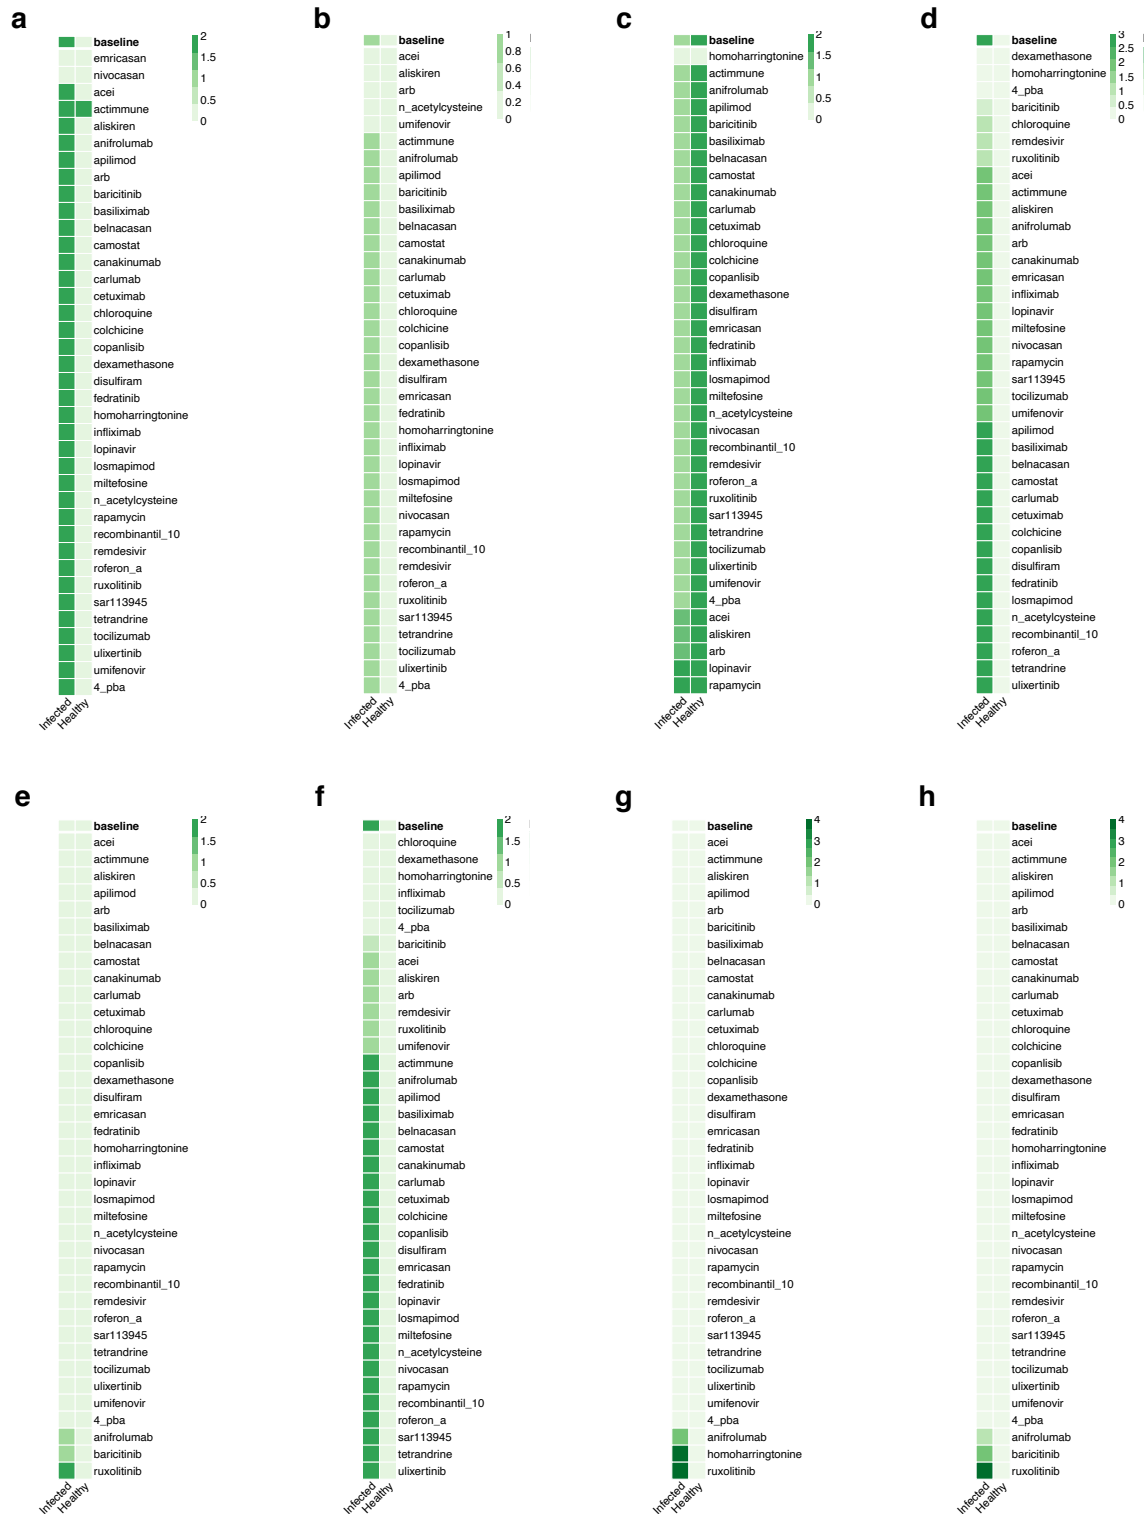

**Supplementary Figure 4 a-h. Effects of single therapies (38 drugs that have passed phase II trials) in late stage, severe COVID-19.** Columns represent infected and healthy conditions, rows represent drugs tested including only drugs with known safety profiles, having completed phase II clinical trials (Supplementary Table 5). Showing the effect on: (a) Cell Death. (b) Fibrosis. (c) Host Protein Synthesis. (d) Inflammation. (e) Syncytia Formation. (f) T-cell Infiltration. (g) Viral Entry. (h) Viral Replication.



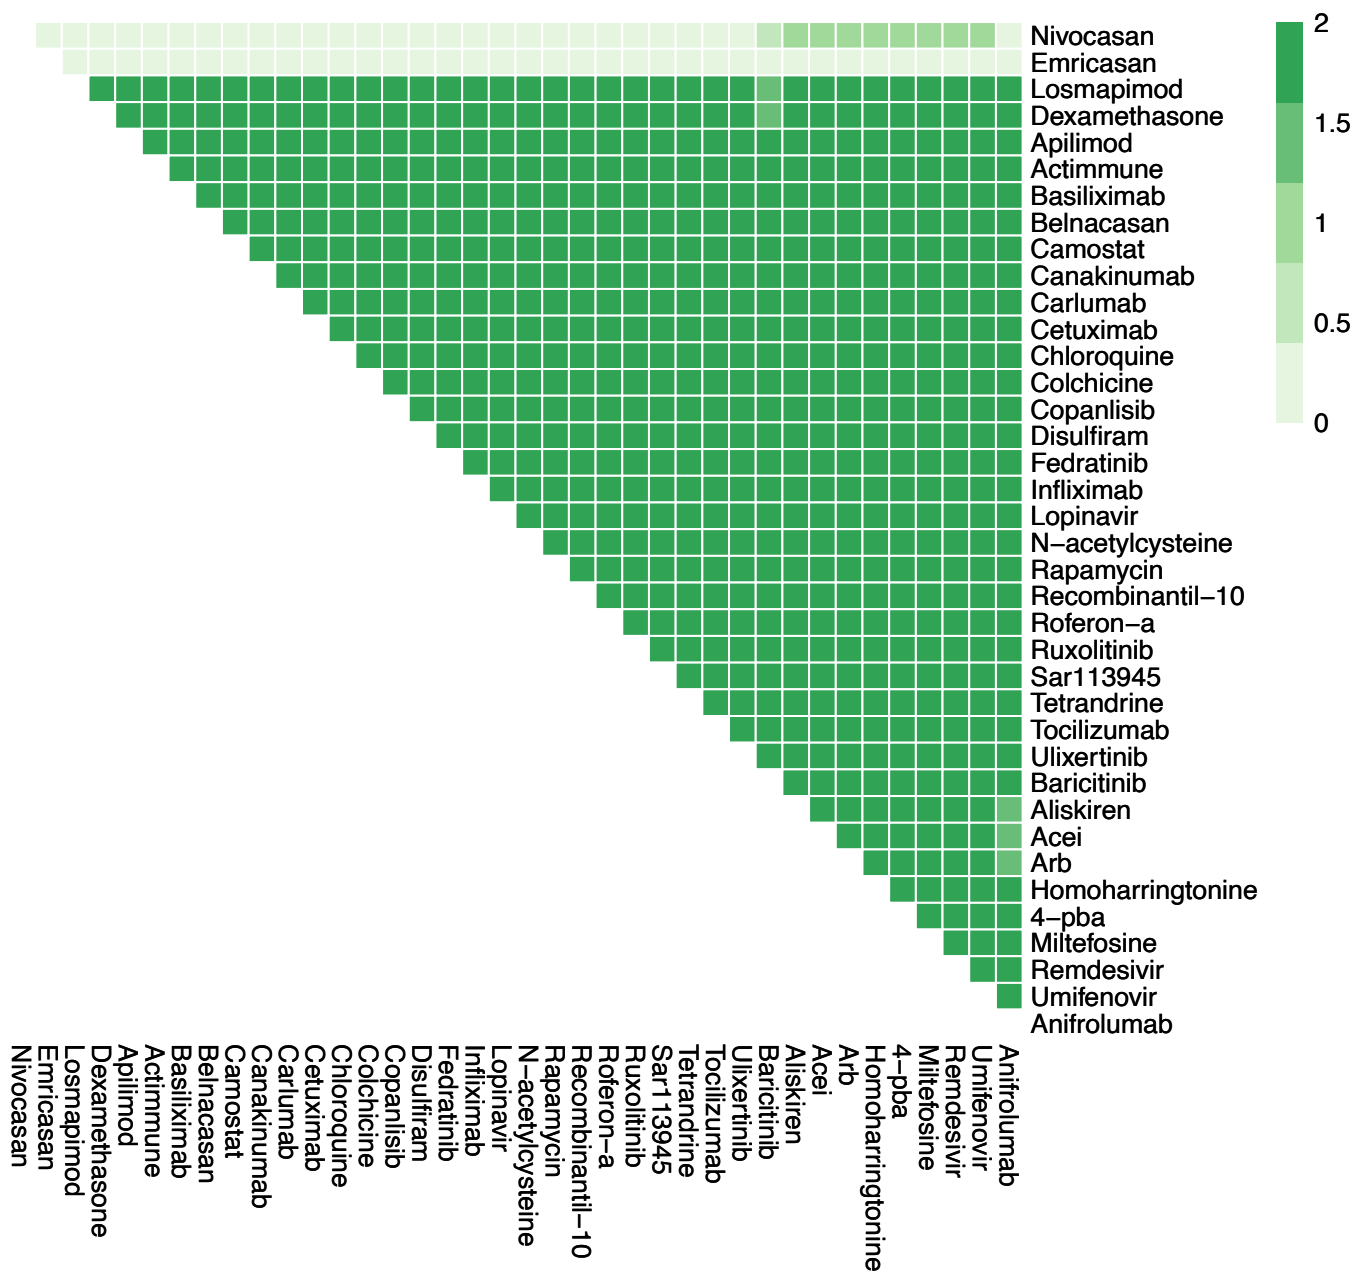

**Supplementary Figure 4i. Effects of combination therapy (38 drugs that have passed phase II trials) on Cell Death in late stage, severe COVID-19.** The colour of the square corresponds to the level of the *CellDeath* node at steady state under treatment by the drugs indicated on the x- and y-axis. The plot shows drugs with known safety profiles, having completed phase II clinical trials (Supplementary Table 5).

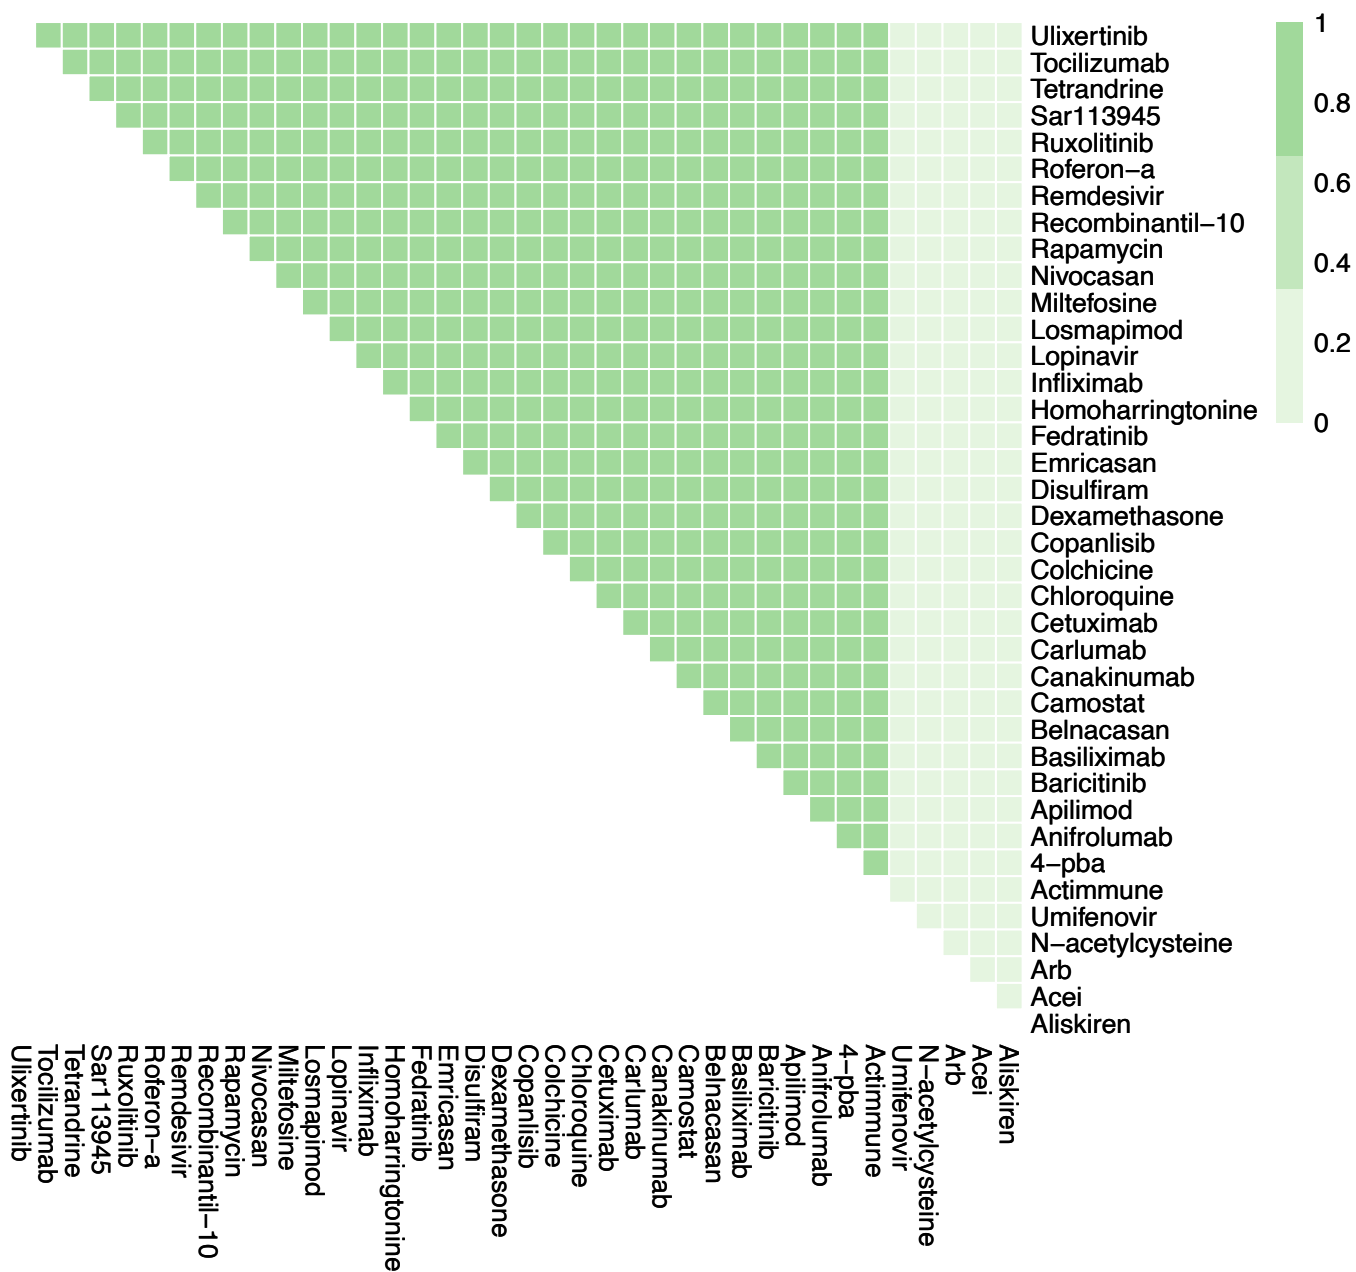

**Supplementary Figure 4j. Effects of combination therapy (38 drugs that have passed phase II trials) on Fibrosis in late stage, severe COVID-19.** The colour of the square corresponds to the level of the *Fibrosis* node at steady state under treatment by the drugs indicated on the x- and y-axis. The plot shows drugs with known safety profiles, having completed phase II clinical trials (Supplementary Table 5).

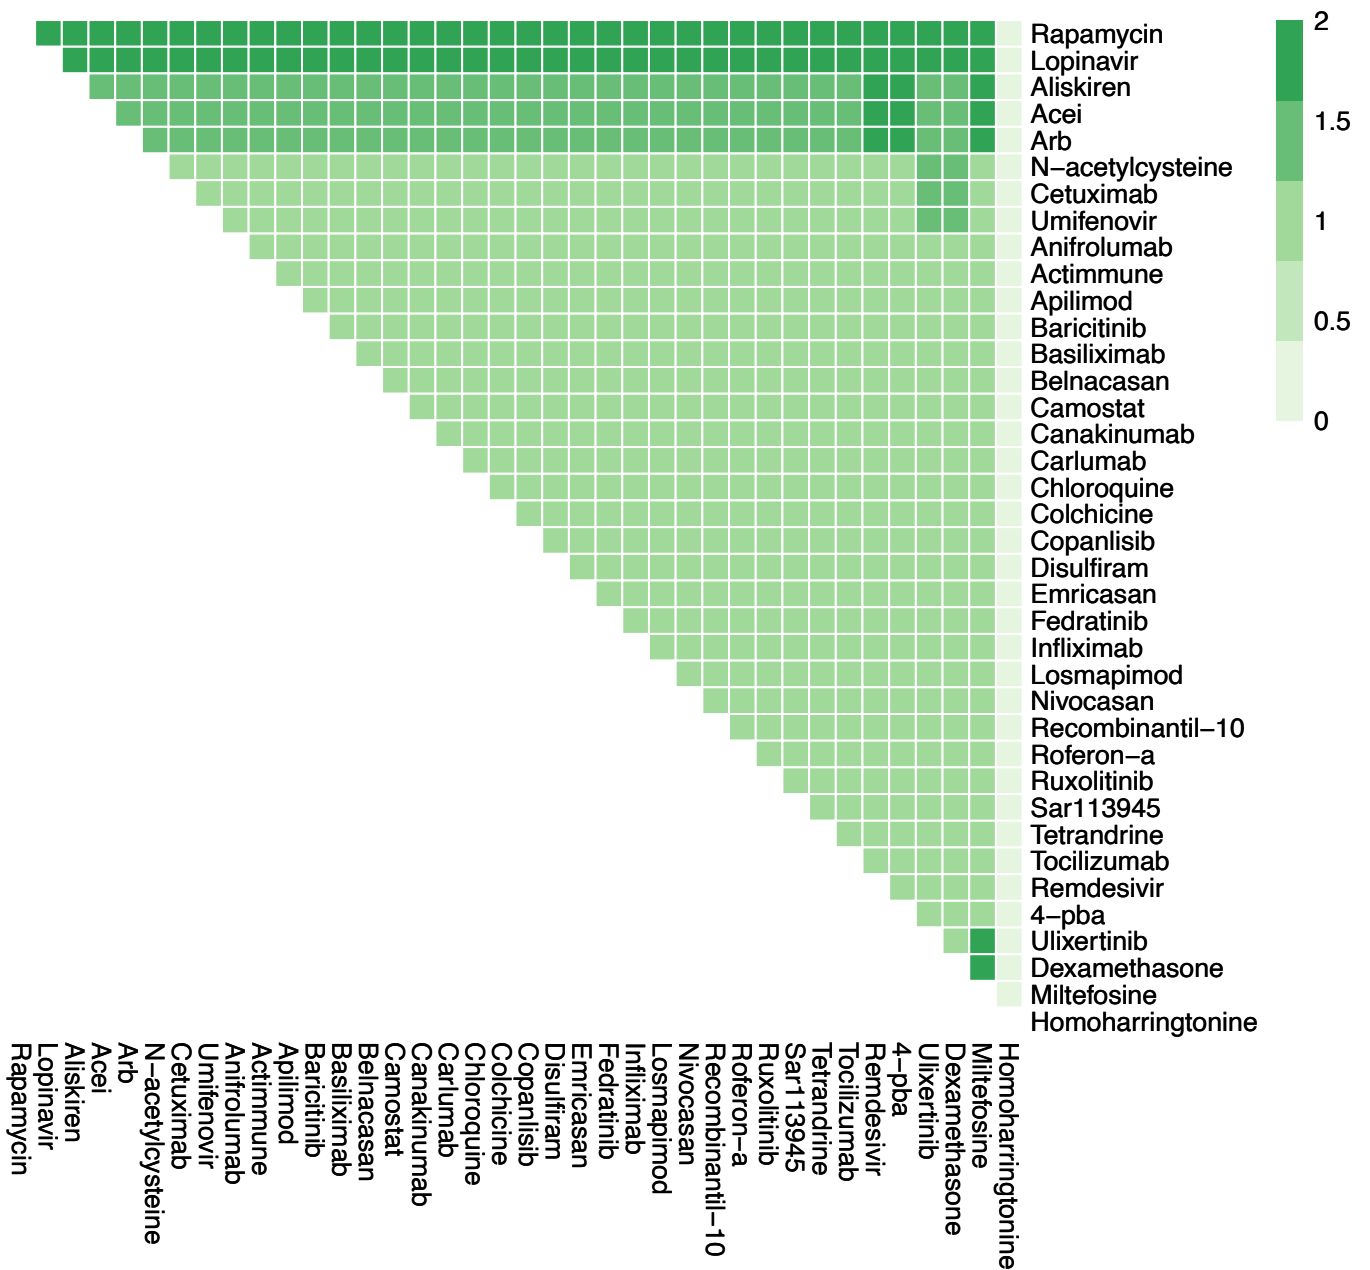

**Supplementary Figure 4k. Effects of combination therapy (38 drugs that have passed phase II trials) on Host Protein Synthesis in late stage, severe COVID-19.** The colour of the square corresponds to the level of the *HostProteinSynthesis* node at steady state under treatment by the drugs indicated on the x- and y-axis. The plot shows drugs with known safety profiles, having completed phase II clinical trials (Supplementary Table 5).

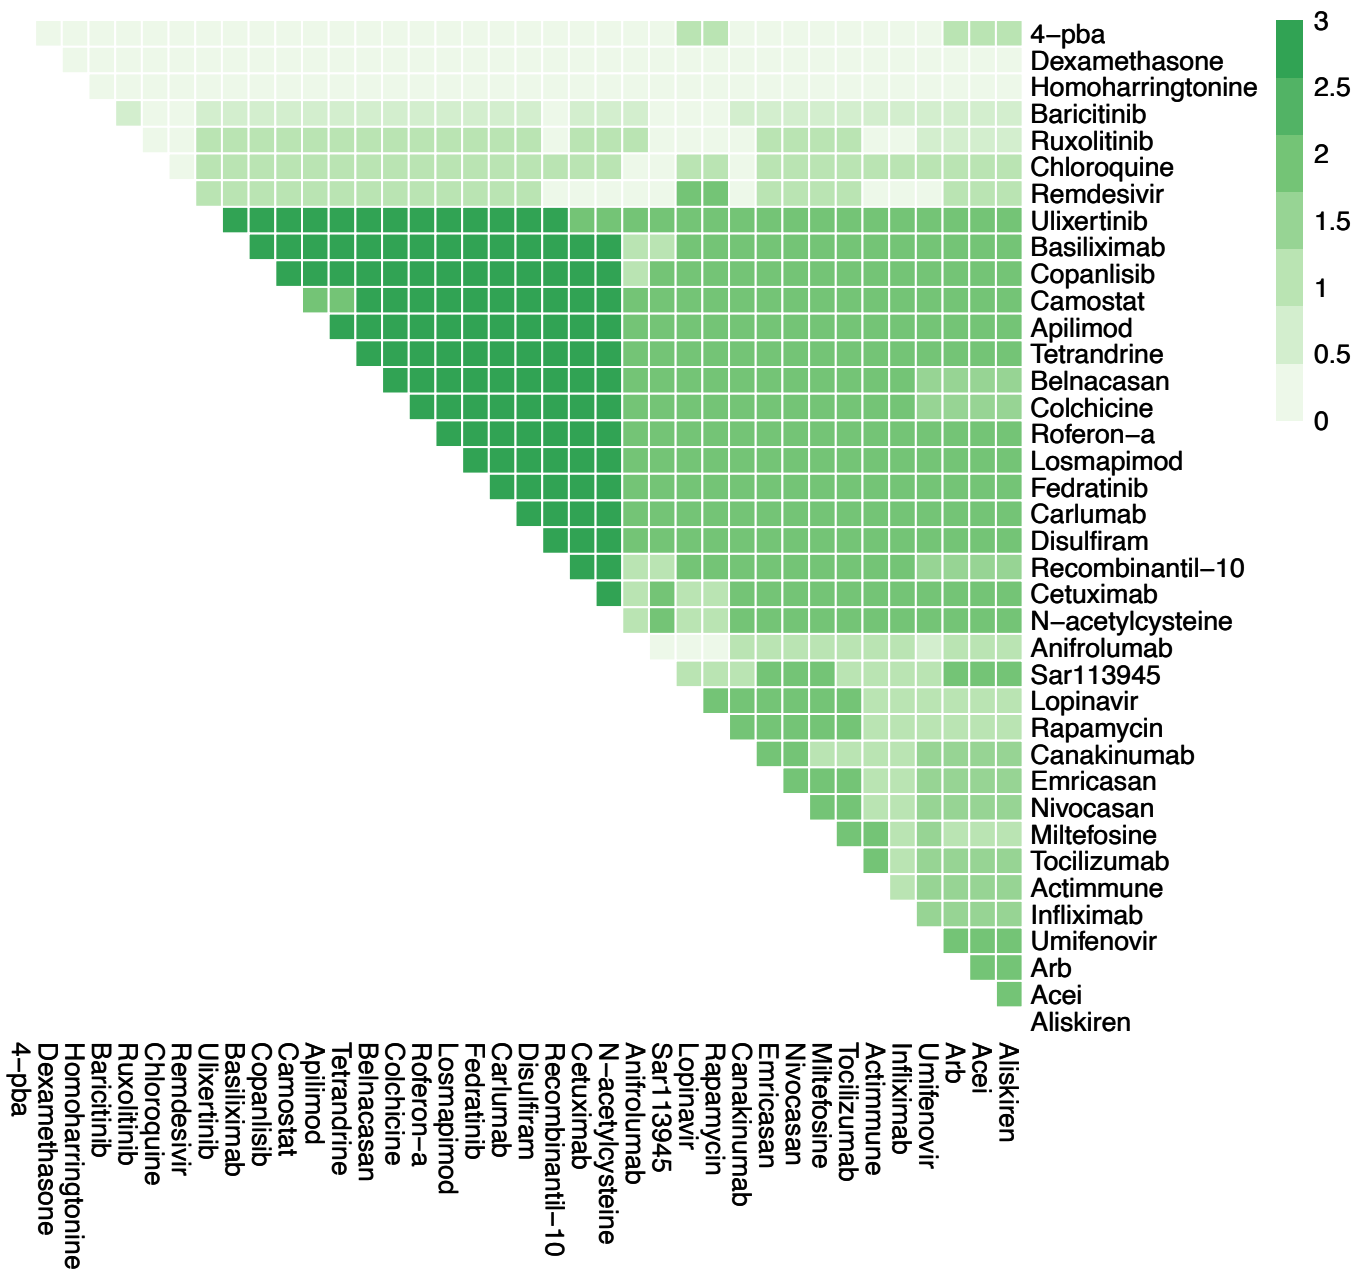

**Supplementary Figure 4I. Effects of combination therapy (38 drugs that have passed phase II trials) on Inflammation in late stage, severe COVID-19.** The colour of the square corresponds to the level of the *Inflammation* node at steady state under treatment by the drugs indicated on the x- and y-axis. The plot shows drugs with known safety profiles, having completed phase II clinical trials (Supplementary Table 5).

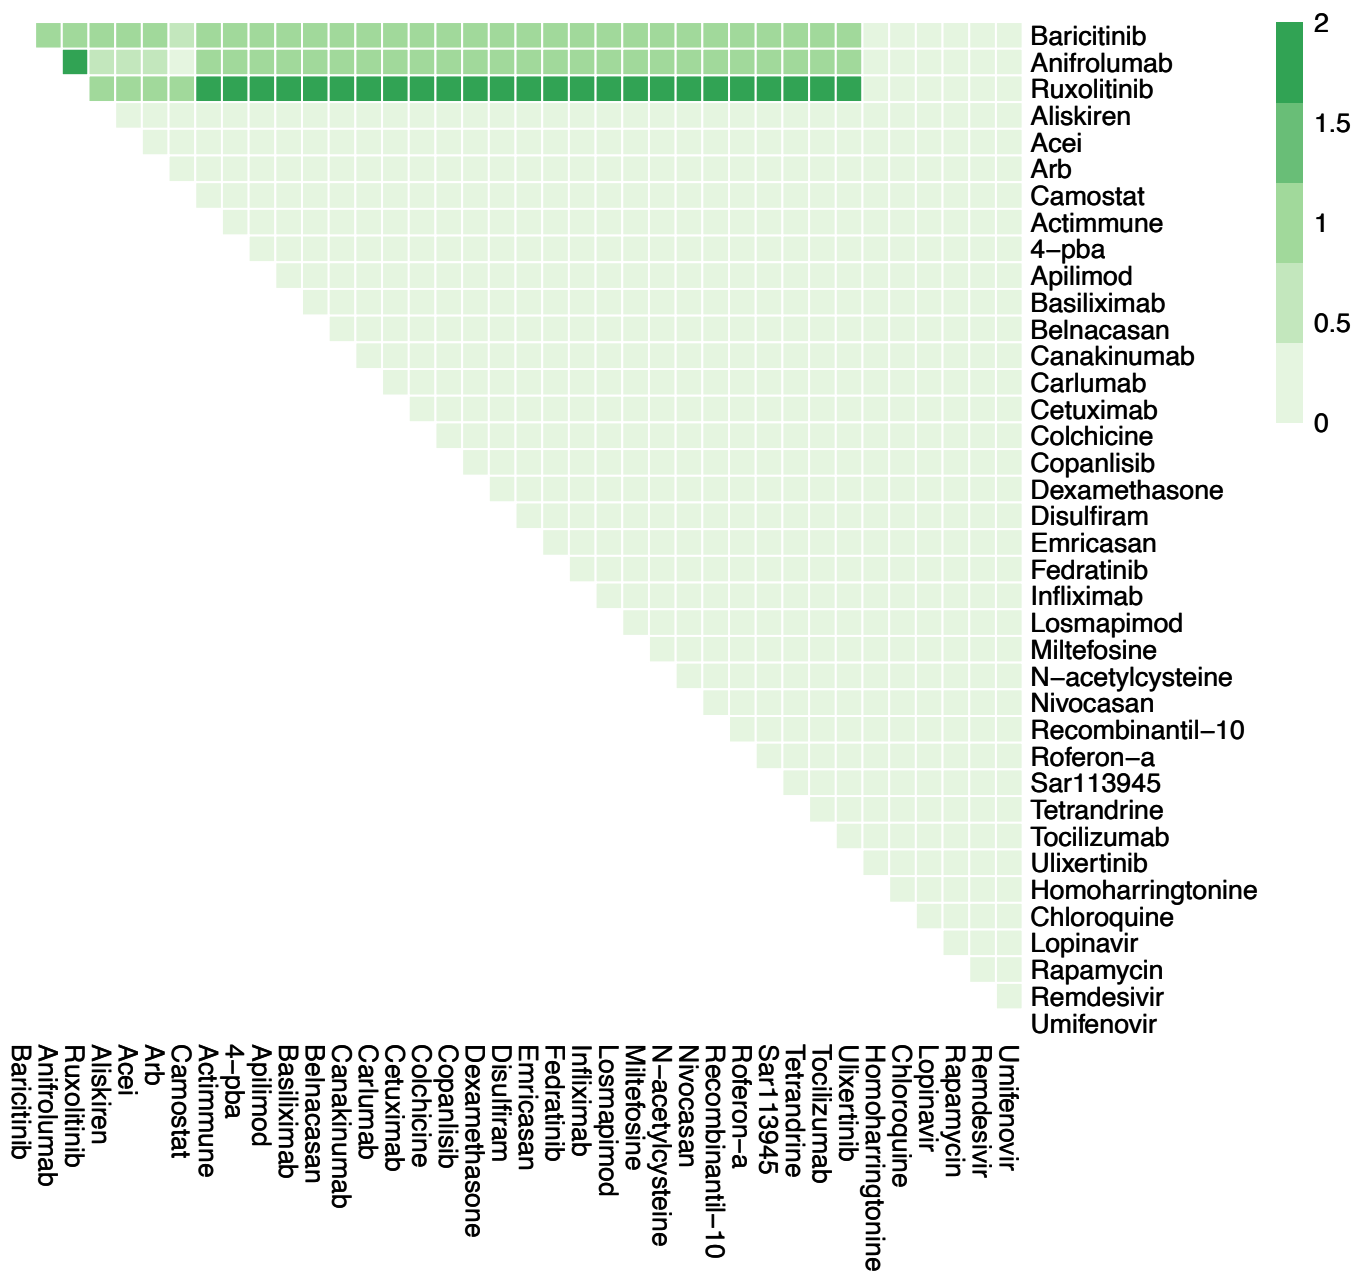

**Supplementary Figure 4m. Effects of combination therapy (38 drugs that have passed phase II trials) on Syncytia Formation in late stage, severe COVID-19.** The colour of the square corresponds to the level of the *SyncytiaFormation* node at steady state under treatment by the drugs indicated on the x- and y-axis. The plot shows drugs with known safety profiles, having completed phase II clinical trials (Supplementary Table 5).

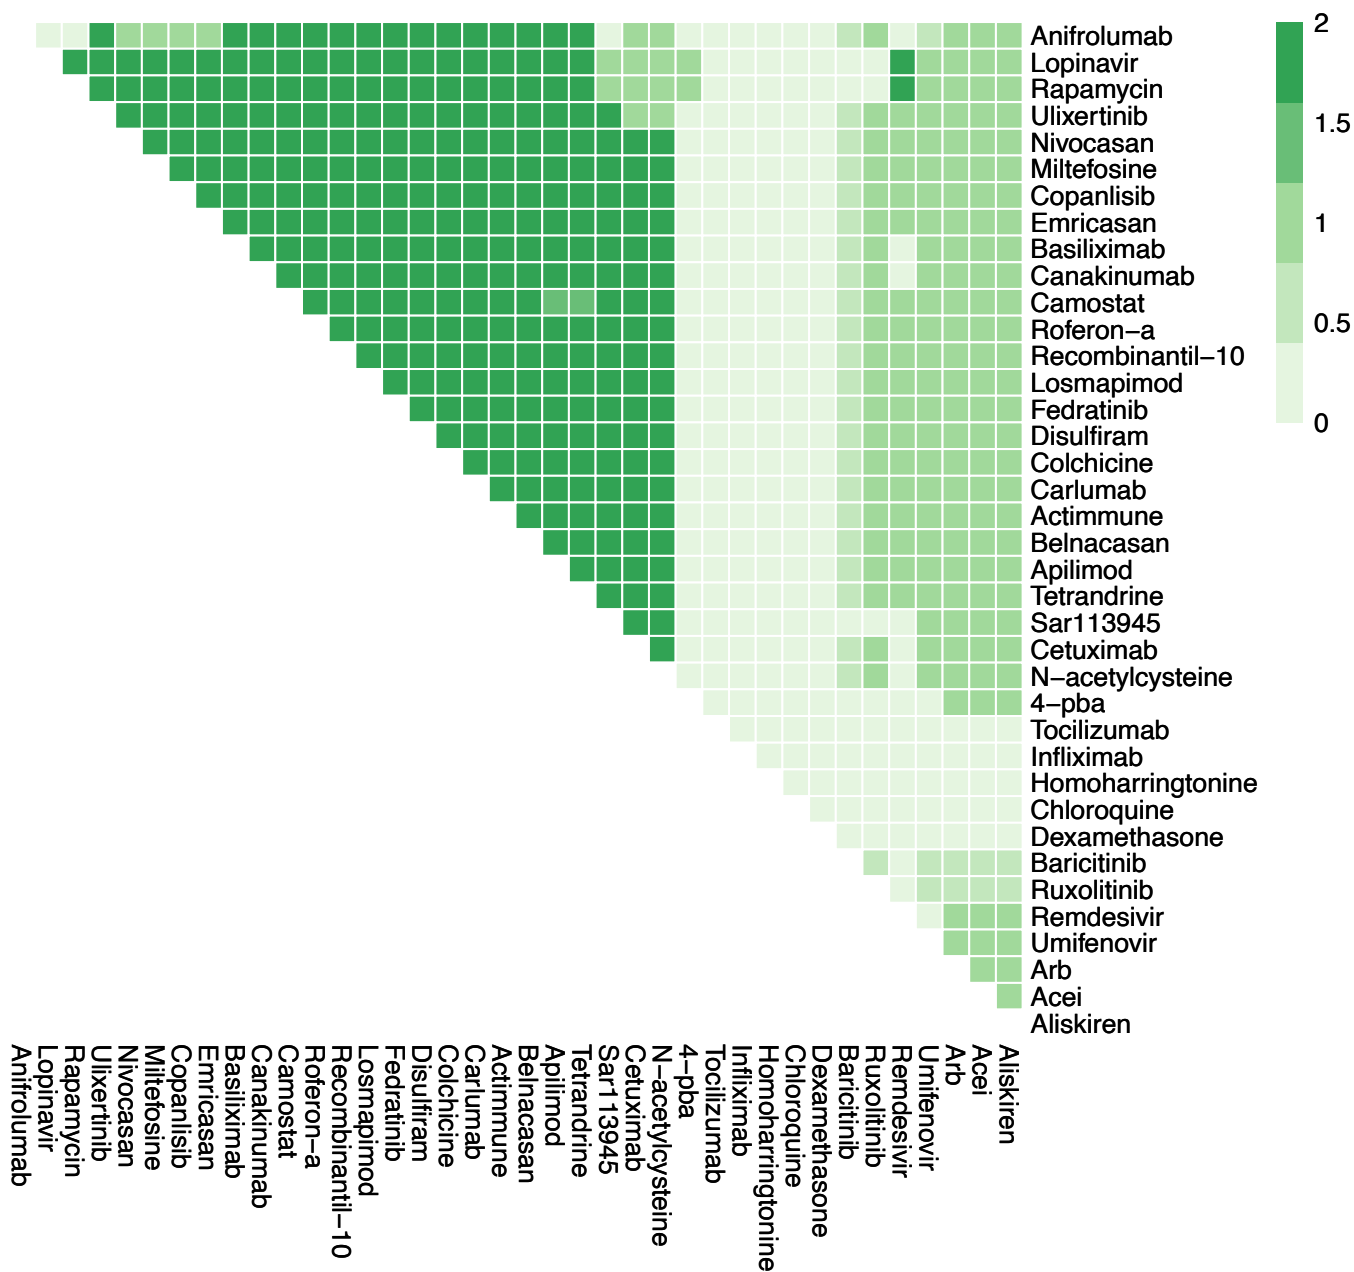

**Supplementary Figure 4n. Effects of combination therapy (38 drugs that have passed phase II trials) on T-cell Infiltration in late stage, severe COVID-19.** The colour of the square corresponds to the level of the *T-cellInfiltration* node at steady state under treatment by the drugs indicated on the x- and y-axis. The plot shows drugs with known safety profiles, having completed phase II clinical trials (Supplementary Table 5).

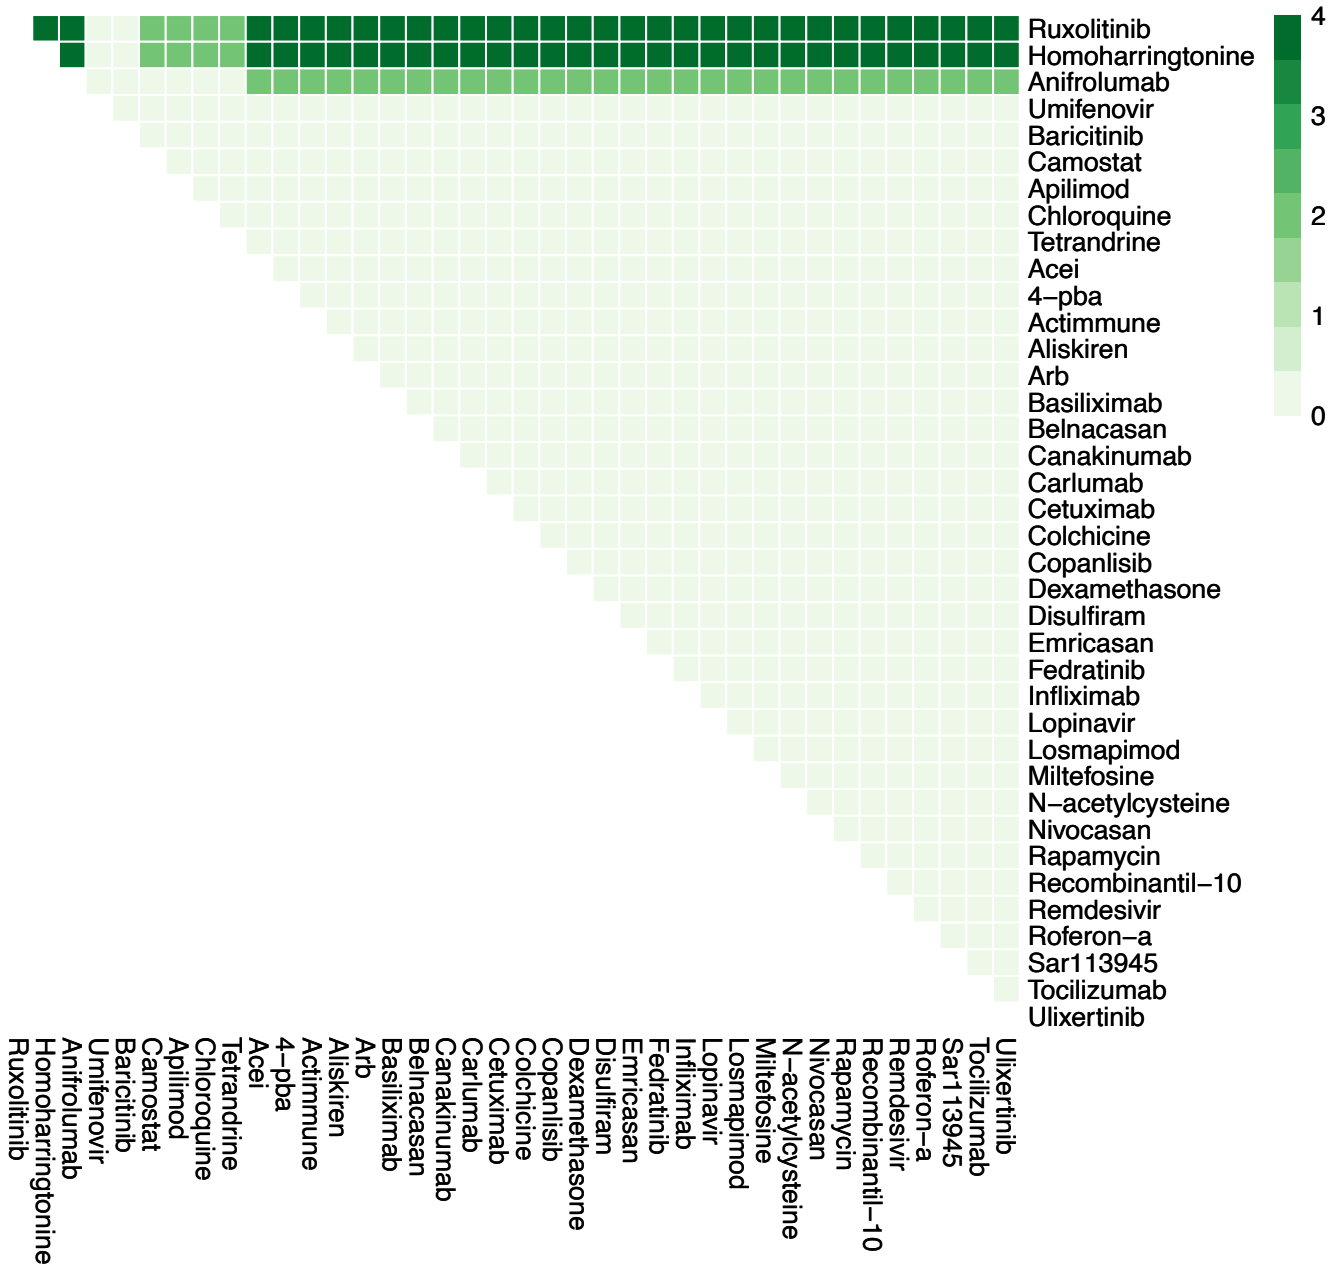

**Supplementary Figure 4o. Effects of combination therapy (38 drugs that have passed phase II trials) on Viral Entry in late stage, severe COVID-19.** The colour of the square corresponds to the level of the *ViralEntry* node at steady state under treatment by the drugs indicated on the x- and y-axis. The plot shows drugs with known safety profiles, having completed phase II clinical trials (Supplementary Table 5).

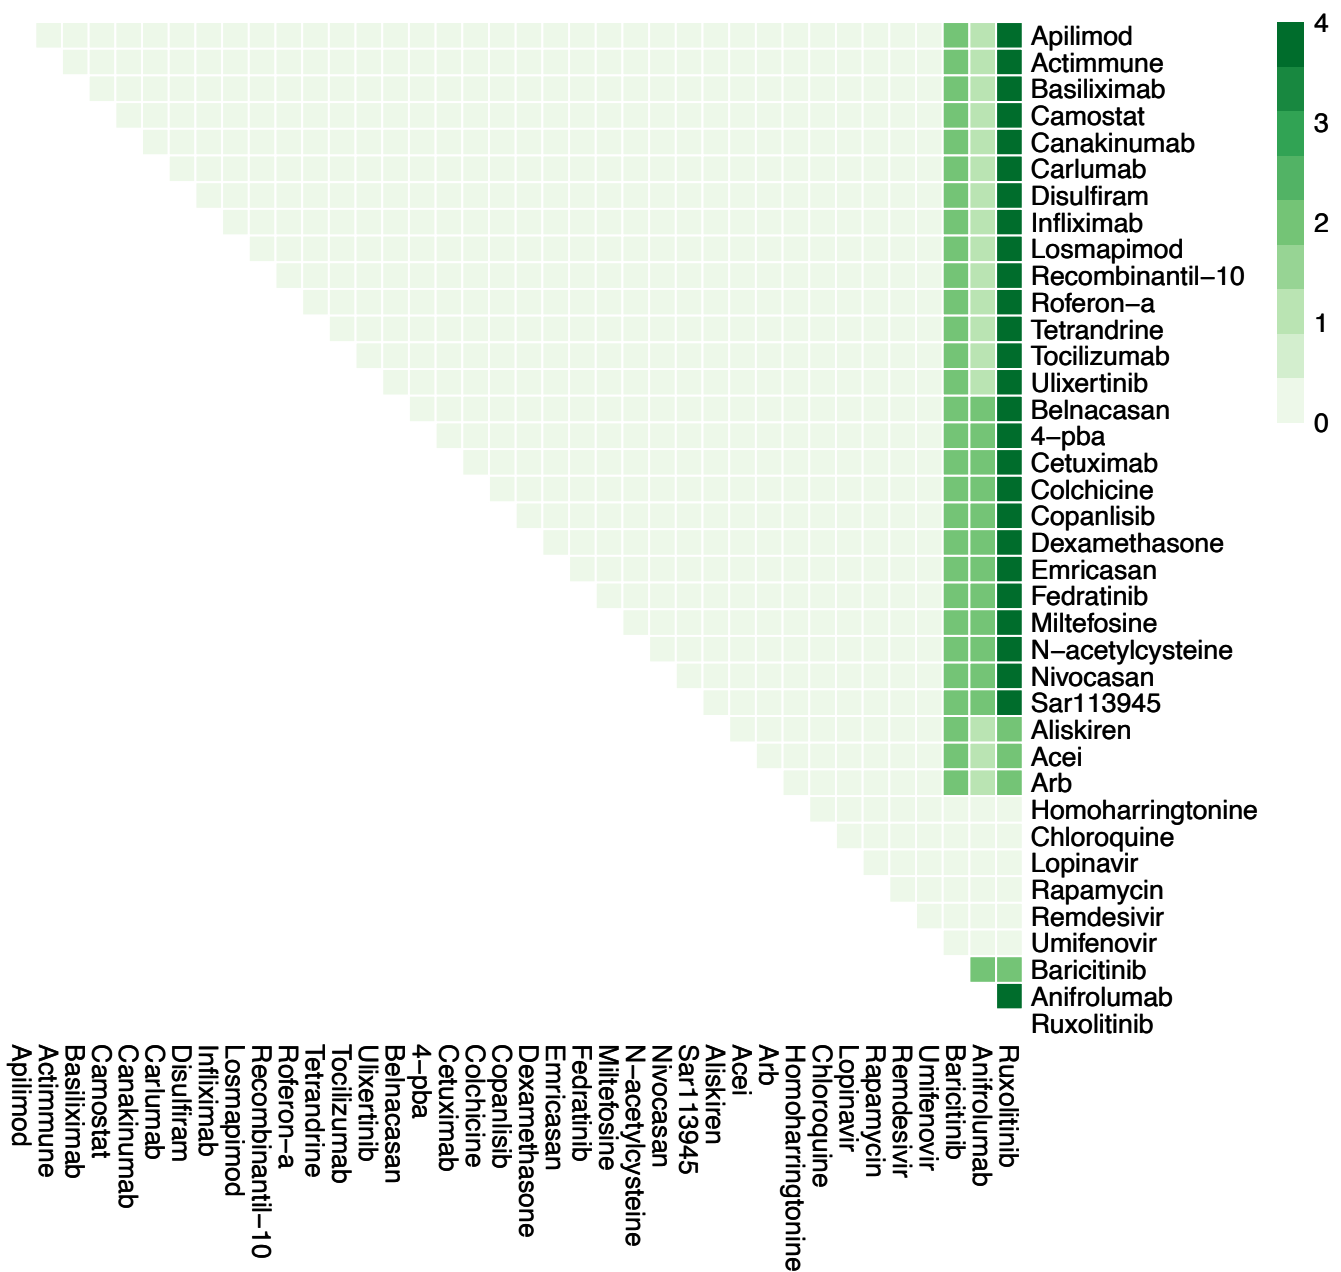

**Supplementary Figure 4p. Effects of combination therapy (38 drugs that have passed phase II trials) on Viral Replication in late stage, severe COVID-19.** The colour of the square corresponds to the level of the *Viral Replication* node at steady state under treatment by the drugs indicated on the x- and y-axis. The plot shows drugs with known safety profiles, having completed phase II clinical trials (Supplementary Table 5).



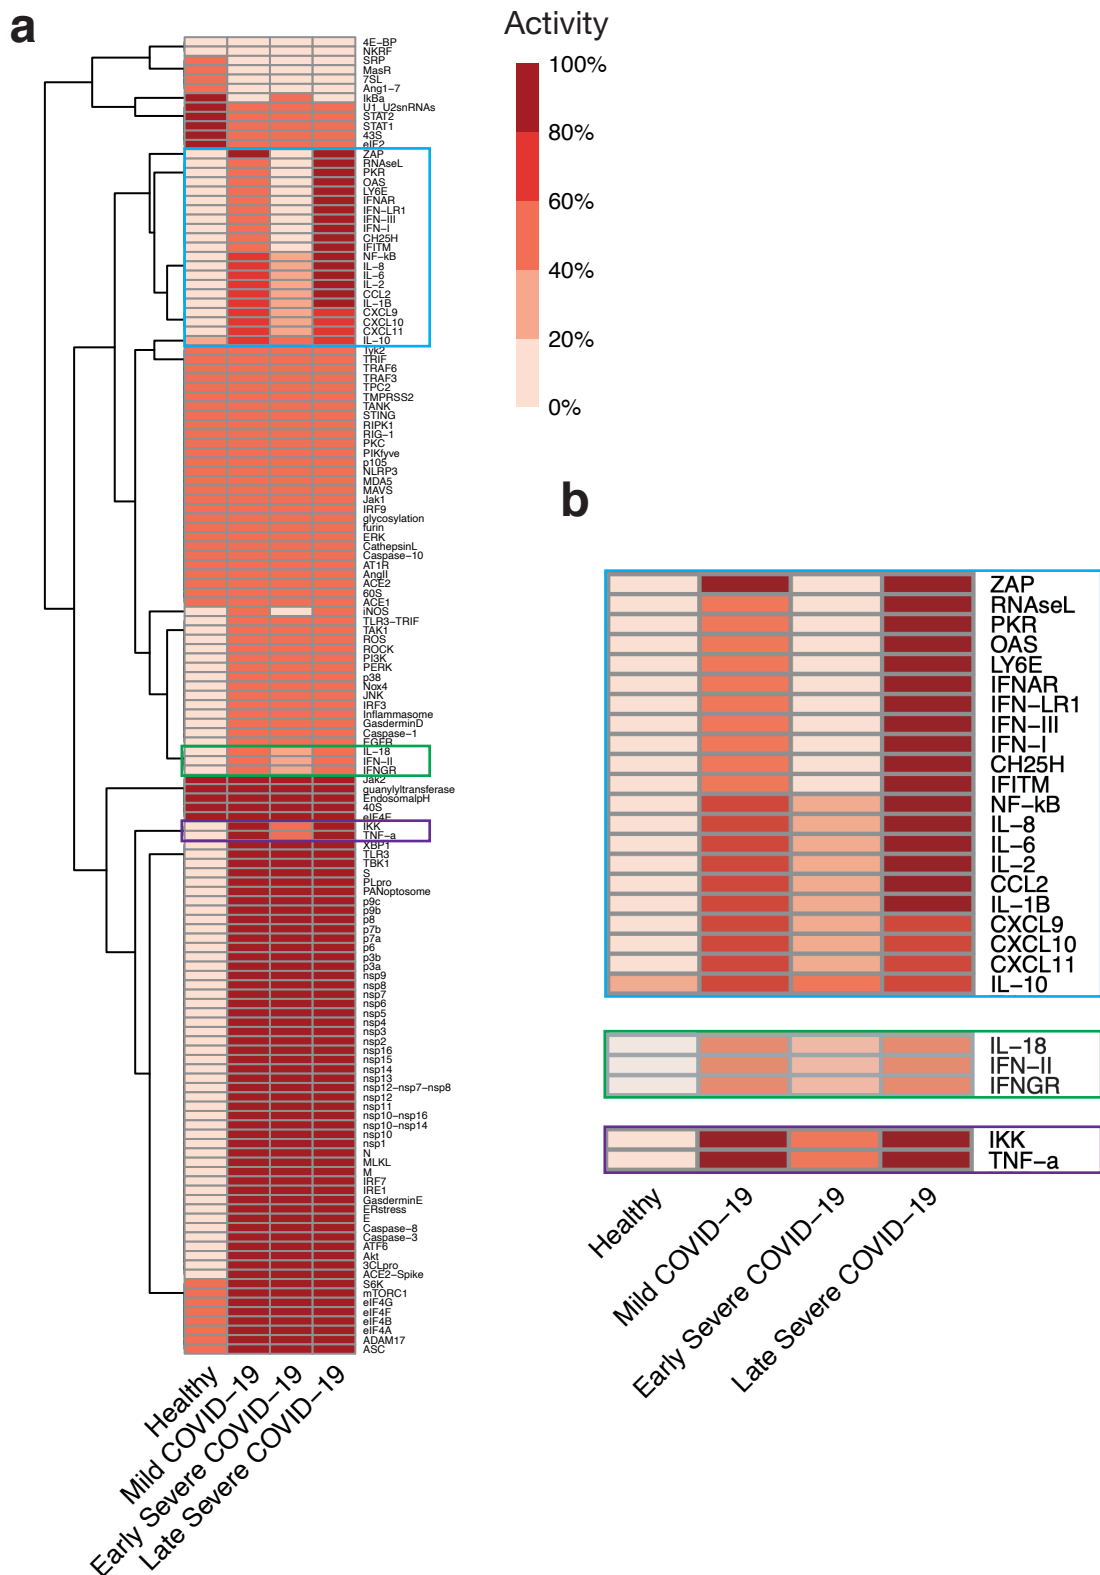

**Supplementary Figure 5. Differential characteristics of Mild, Early Severe and Late Severe COVID-19** (a) Hierarchical clustering heatmap representing the steady state values of each node in the network model for mild disease, and early and late severe disease (healthy controls for comparison). (b) Zoom in plot of areas in (a) that vary between disease states. All nodes normalised to maximal level of respective nodes, and range between 0-100%.

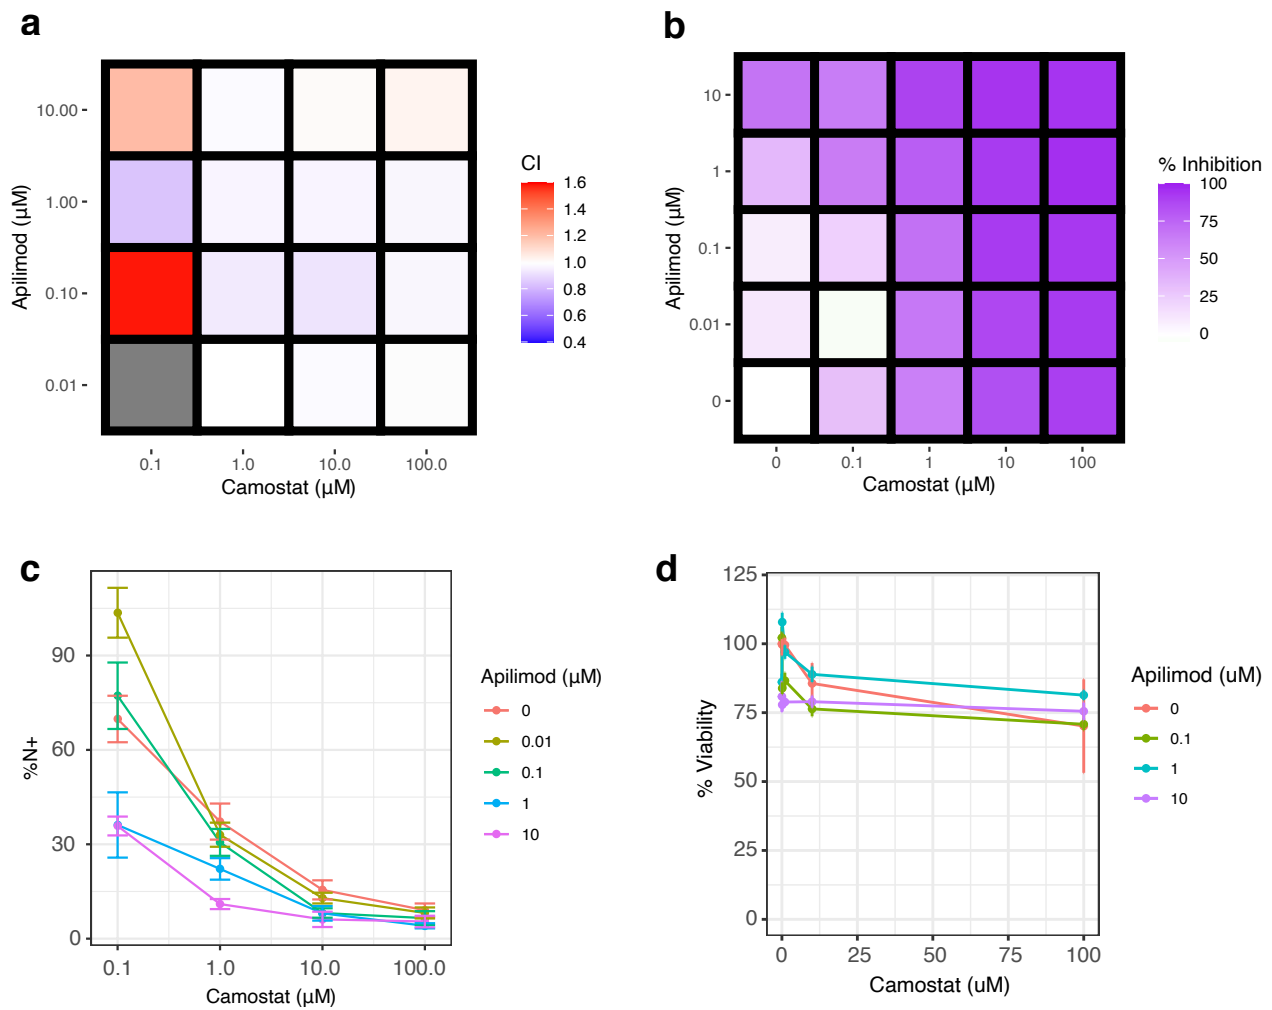

**Supplementary Figure 6: Camostat and Apilimod inhibit replication of SARS-CoV-2 in Caco-2 cells.** (a) Heatmap showing the Cooperativity Index (CI) between each dose of Apilimod and Camostat tested. The CI was calculated according to the Bliss independence model. (b) The percentage inhibition of cells expressing nucleocapsid protein achieved at each dose of Apilimod and Camostat tested. (c) Line graph showing the effect of dose of Apilimod against increasing dose of Camostat. Data show the mean and standard error, from three independent experiments. (d) Line graph showing the effect on cell viability, as assessed by MTT assay, of Apilimod against increasing dose of Camostat. Data show the mean and standard error of cell viability, from three independent experiments, normalized to the mean of the controls.

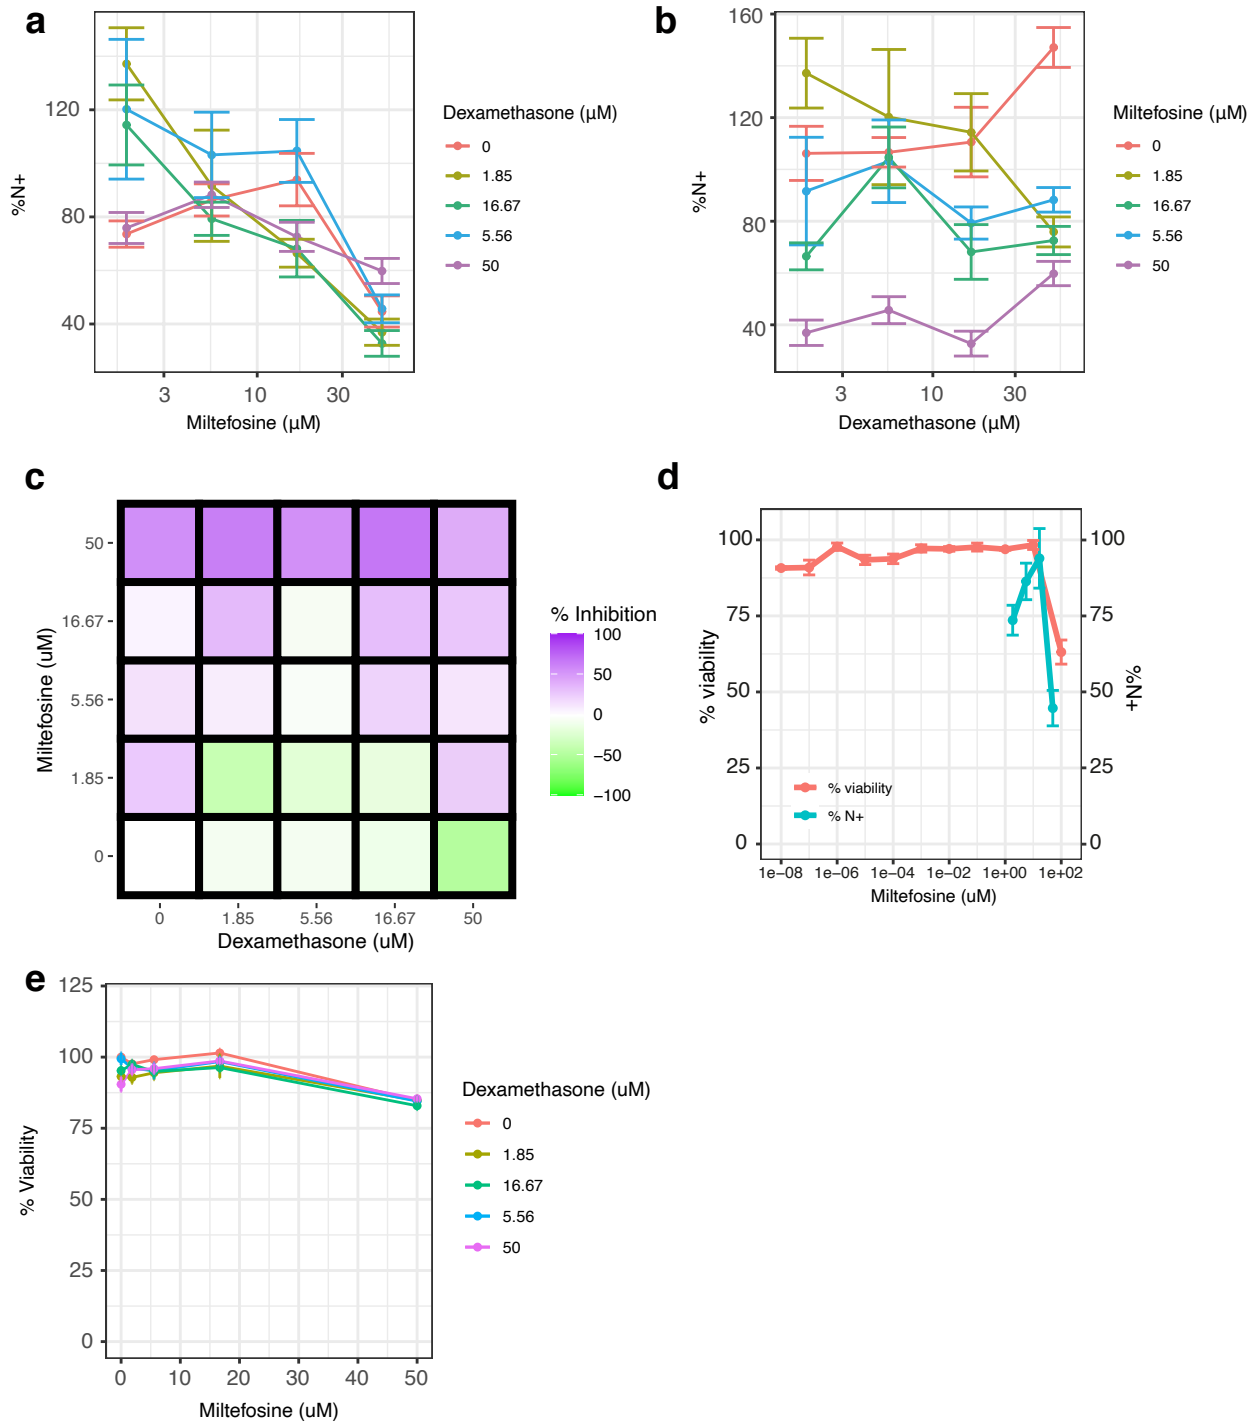

**Supplementary Figure 7: The impact of Dexamethasone and Miltefosine on replication of SARS-CoV-2 in Caco-2 cells.** (a) Line graph showing the effect of dose of Dexamethasone against increasing dose of Miltefosine. (b) Line graph showing the effect of dose of Miltefosine against increasing dose of Dexamethasone. (c) The percentage inhibition of cells expressing nucleocapsid protein achieved at each dose of Dexamethasone and Miltefosine tested. (d) Percentage viability as determined by MTT assay plotted alongside percentage of cells expressing nucleocapsid protein at varying doses of Miltefosine. Data show the mean and standard error, from three independent experiments. (e) Line graph showing the effect on cell viability, as assessed by MTT assay, of Miltefosine against increasing dose of Dexamethasone. Data show the mean and standard error of cell viability, from three independent experiments, normalized to the mean of the controls.

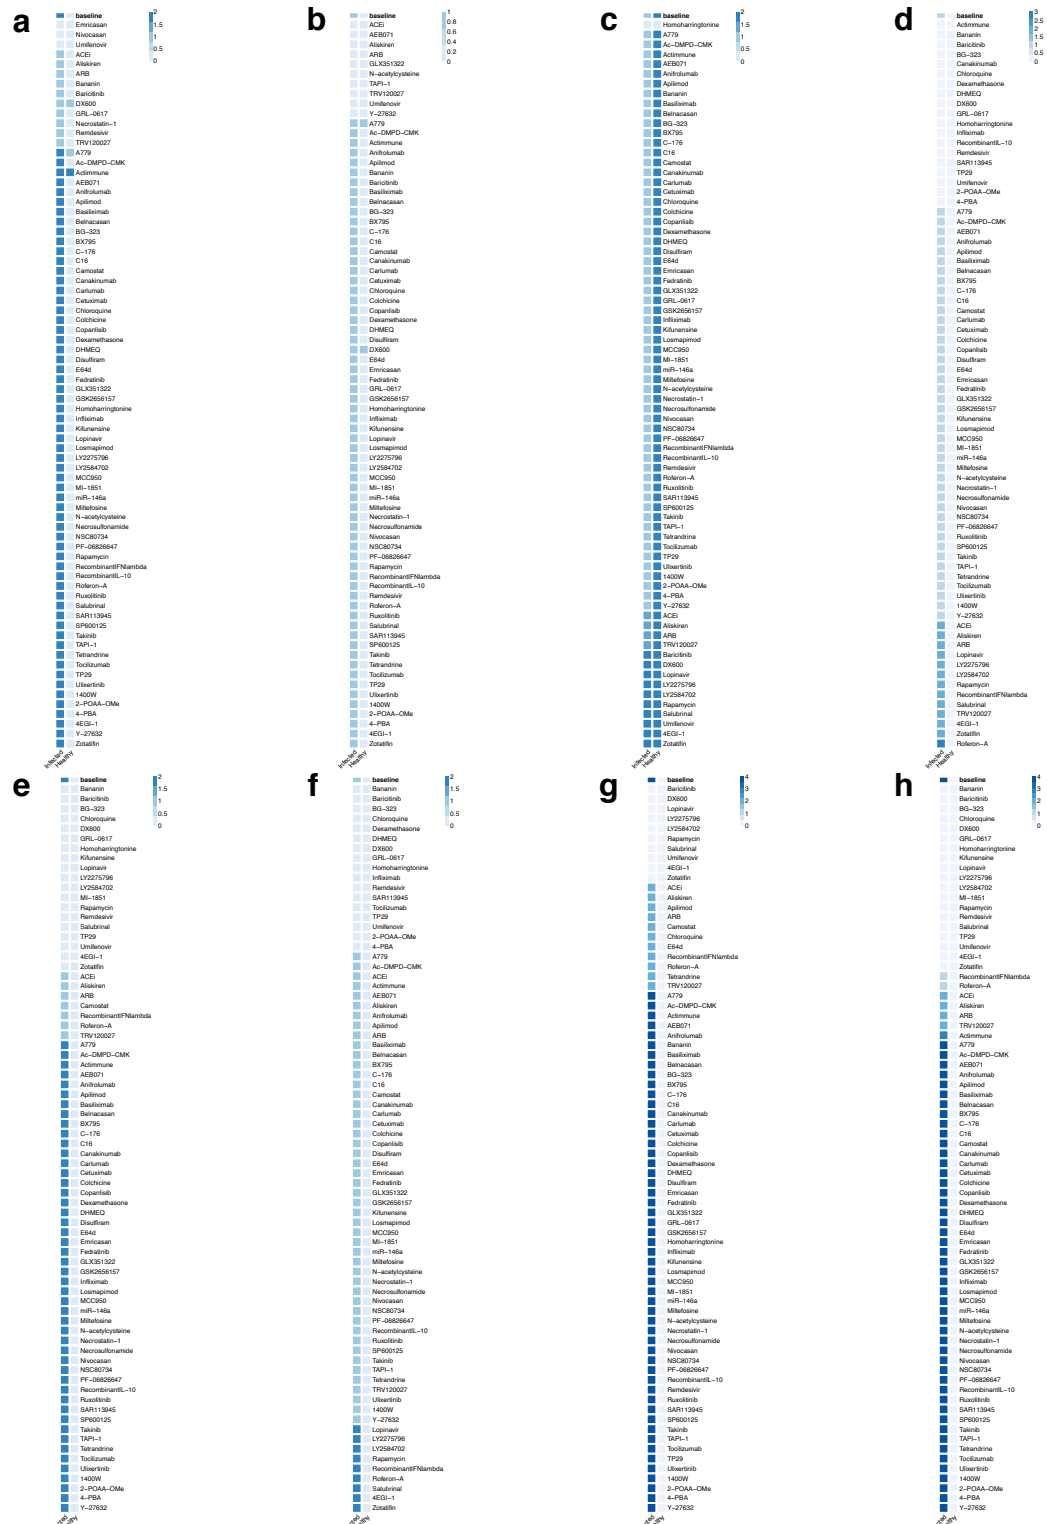

**Supplementary Figure 8 a-h. Effects of single therapies (74 drugs, including those that have not passed phase II trials) in early stage, severe COVID-19.** Columns represent infected and healthy conditions, rows represent drug tested including those at an experimental stage of development (Supplementary Table 5). Showing the effect on: (a) Cell Death. (b) Fibrosis. (c) Host Protein Synthesis. (d) Inflammation. (e) Syncytia Formation. (f) T-cell Infiltration. (g) Viral Entry. (h) Viral Replication.

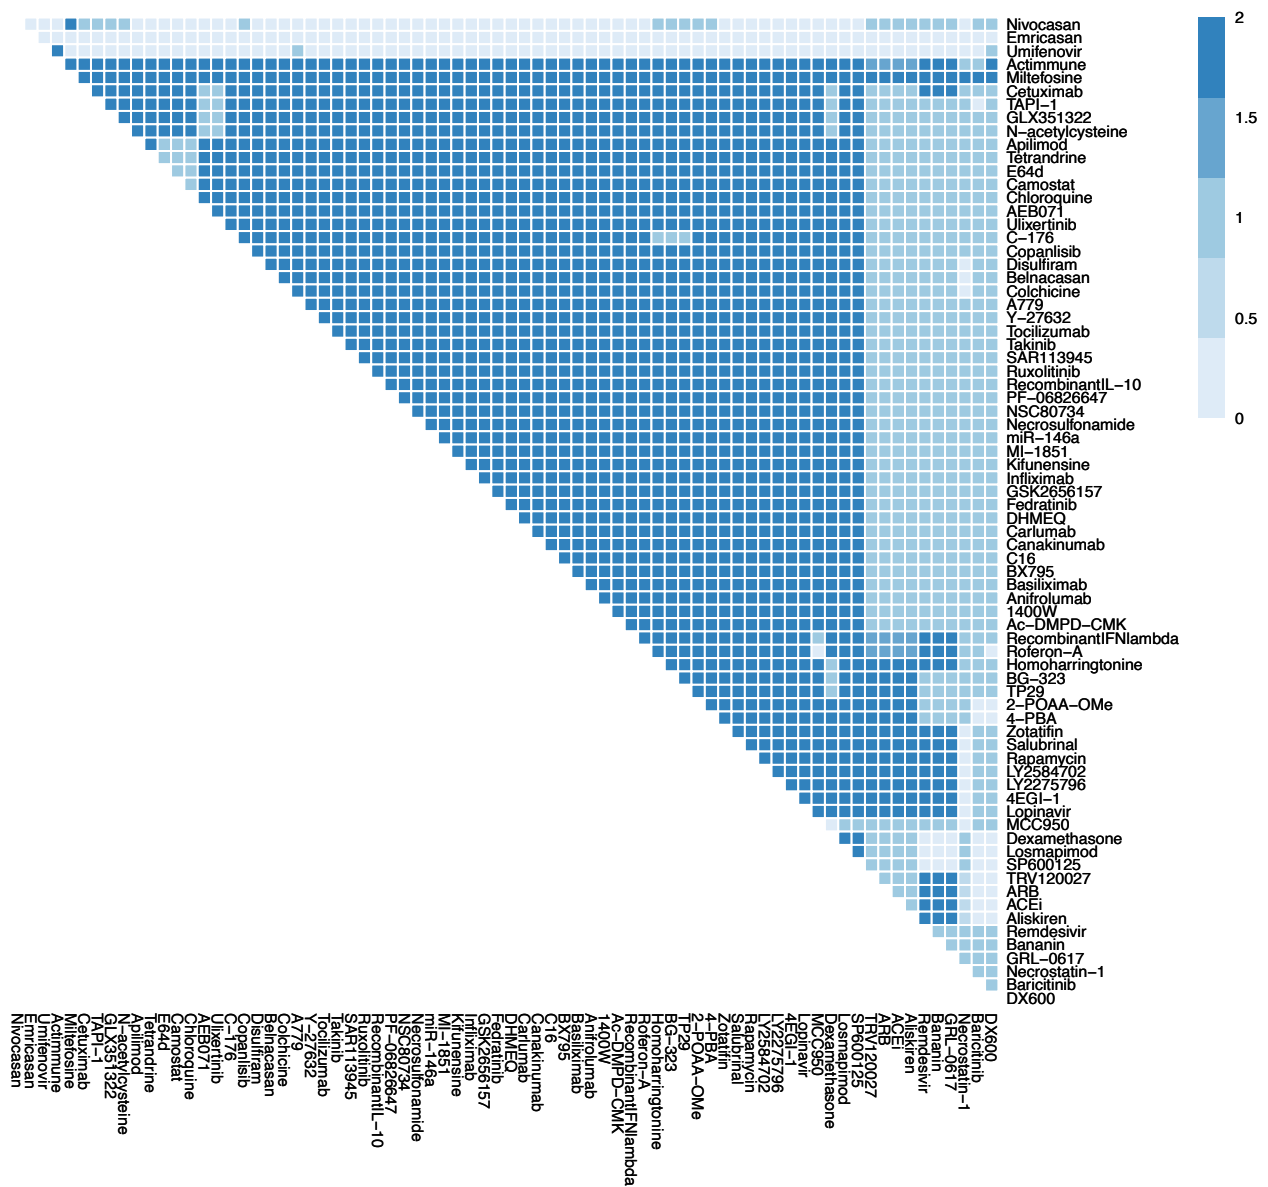

**Supplementary Figure 8i Effects of combination therapy (74 drugs, including those that have not passed phase II trials) on Cell Death in early stage, severe COVID-19.** The colour of the square corresponds to the level of the *CellDeath* node at steady state under treatment by the drugs indicated on the x- and y-axis. This plot shows all drugs, including those at an experimental stage of development.

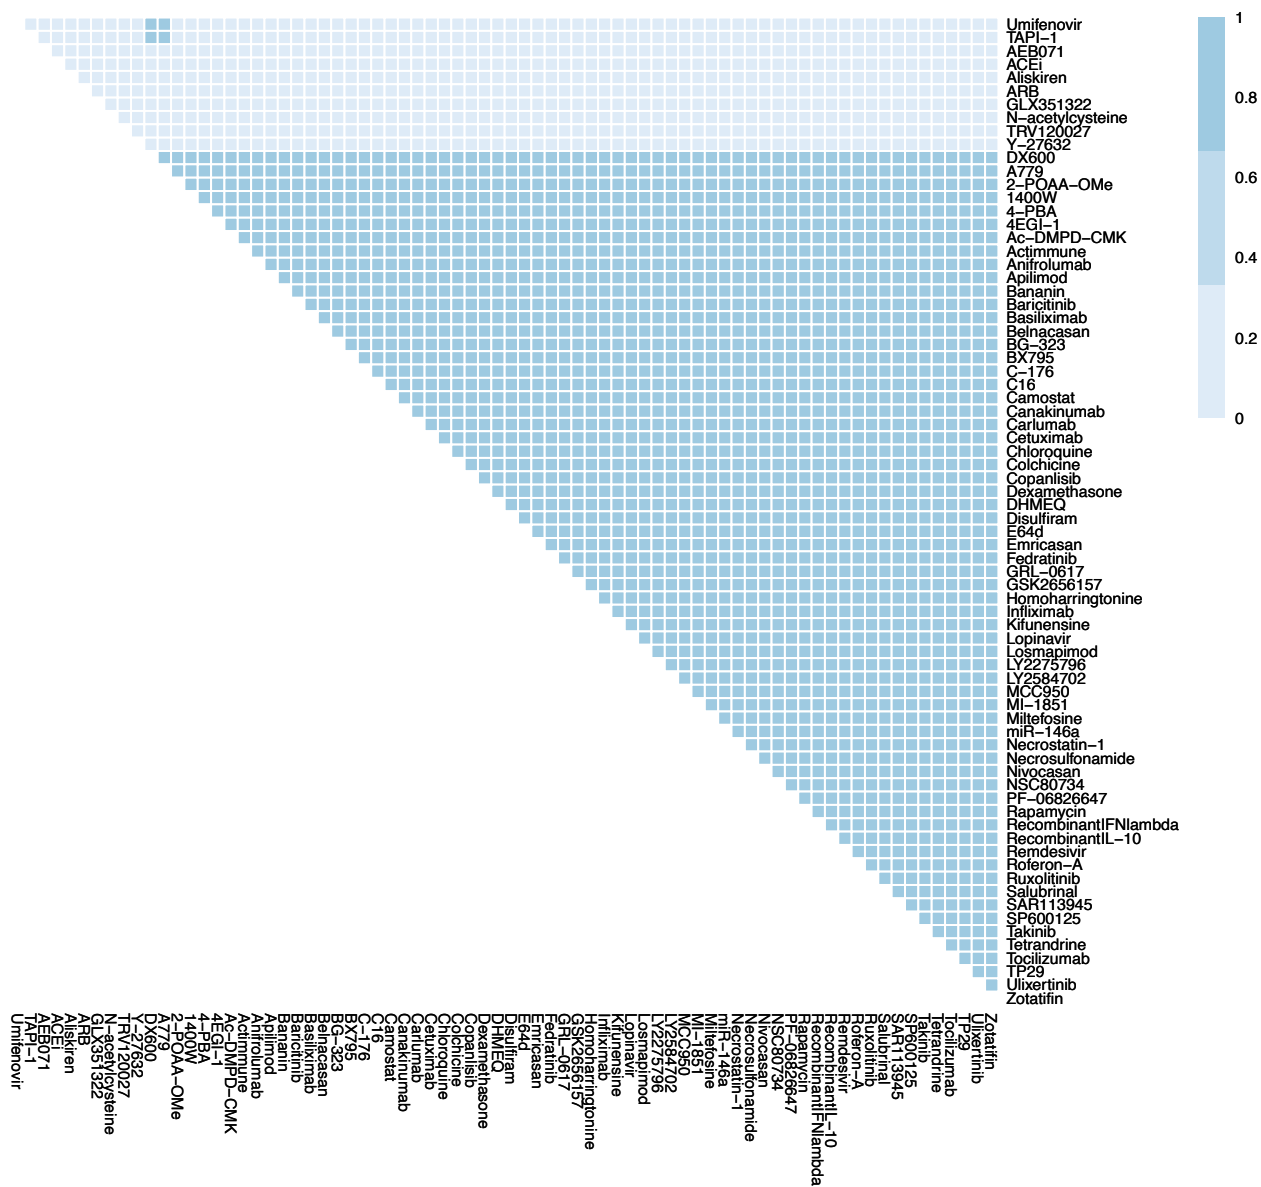

**Supplementary Figure 8j. Effects of combination therapy (74 drugs, including those that have not passed phase II trials) on Fibrosis in early stage, severe COVID-19.** The colour of the square corresponds to the level of the *Fibrosis* node at steady state under treatment by the drugs indicated on the x- and y-axis. This plot shows all drugs, including those at an experimental stage of development.

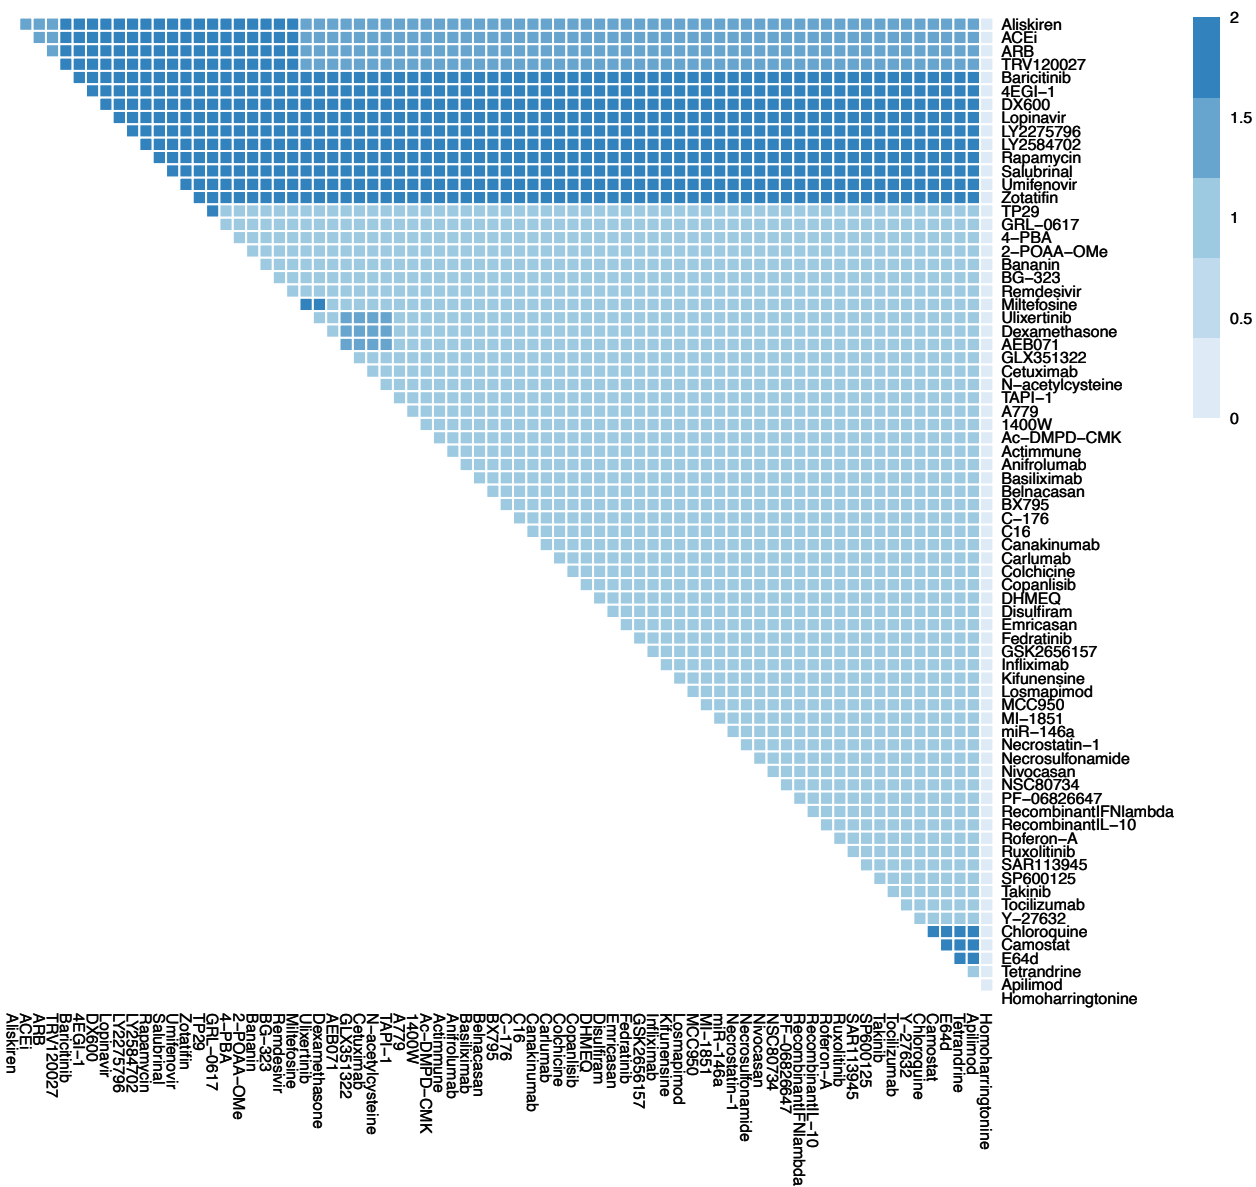

**Supplementary Figure 8k. Effects of combination therapy (74 drugs, including those that have not passed phase II trials) on Host Protein Synthesis in early stage, severe COVID-19.** The colour of the square corresponds to the level of the *HostProteinSynthesis* node at steady state under treatment by the drugs indicated on the x- and y-axis. This plot shows all drugs, including those at an experimental stage of development.

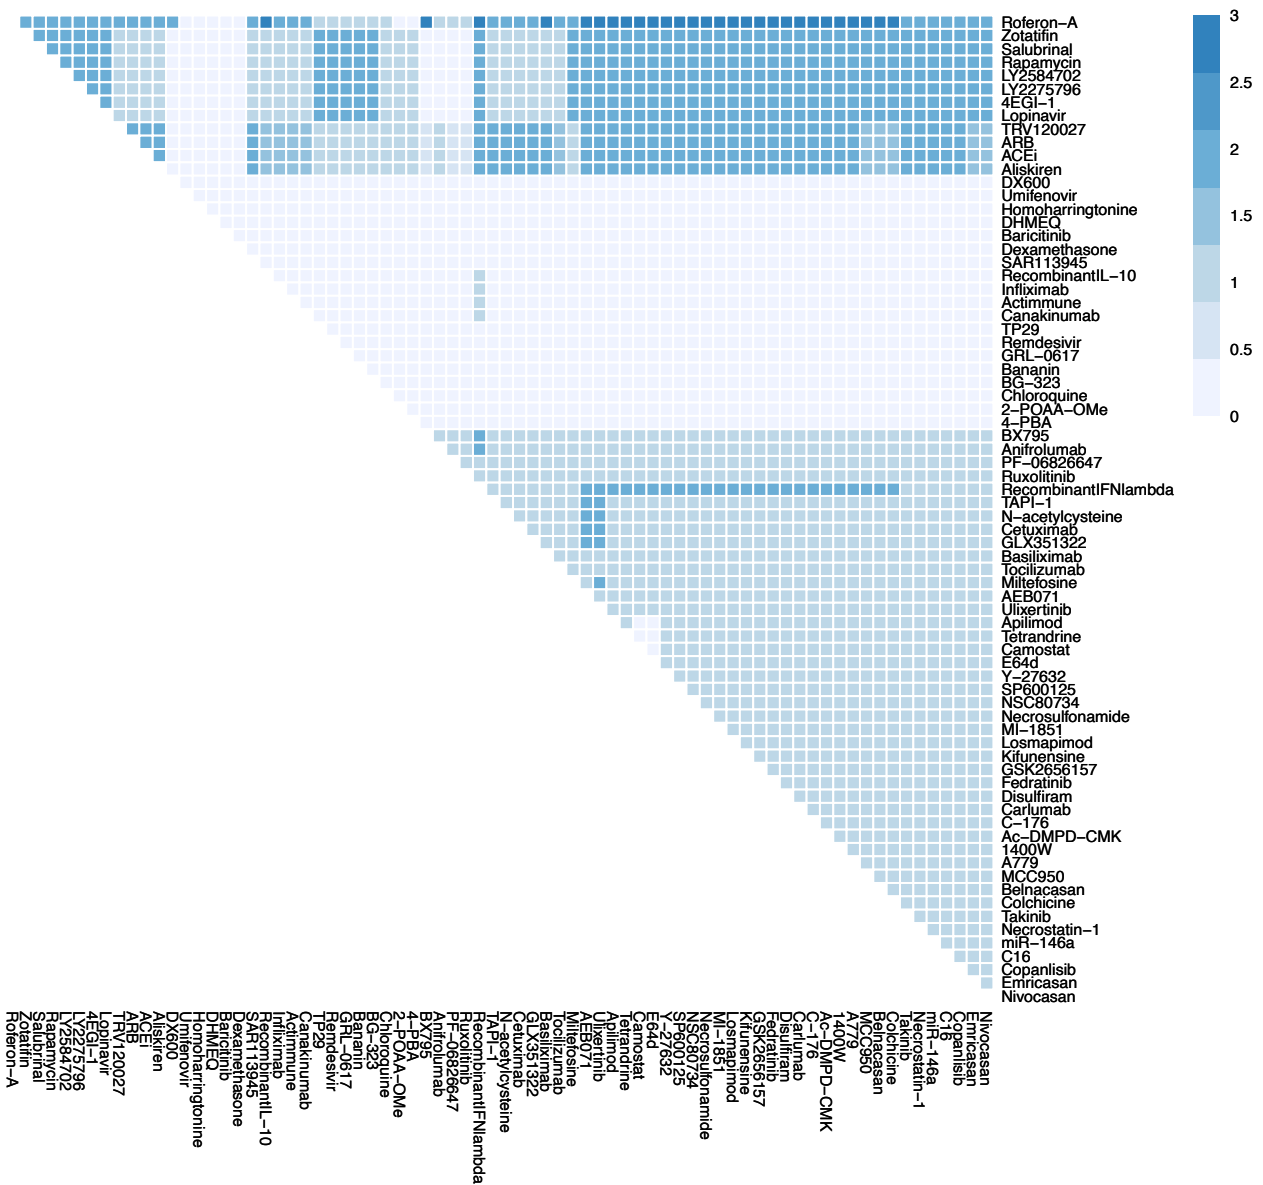

**Supplementary Figure 8I. Effects of combination therapy (74 drugs, including those that have not passed phase II trials) on Inflammation in early stage, severe COVID-19.** The colour of the square corresponds to the level of the *Inflammation* node at steady state under treatment by the drugs indicated on the x- and y-axis. This plot shows all drugs, including those at an experimental stage of development.



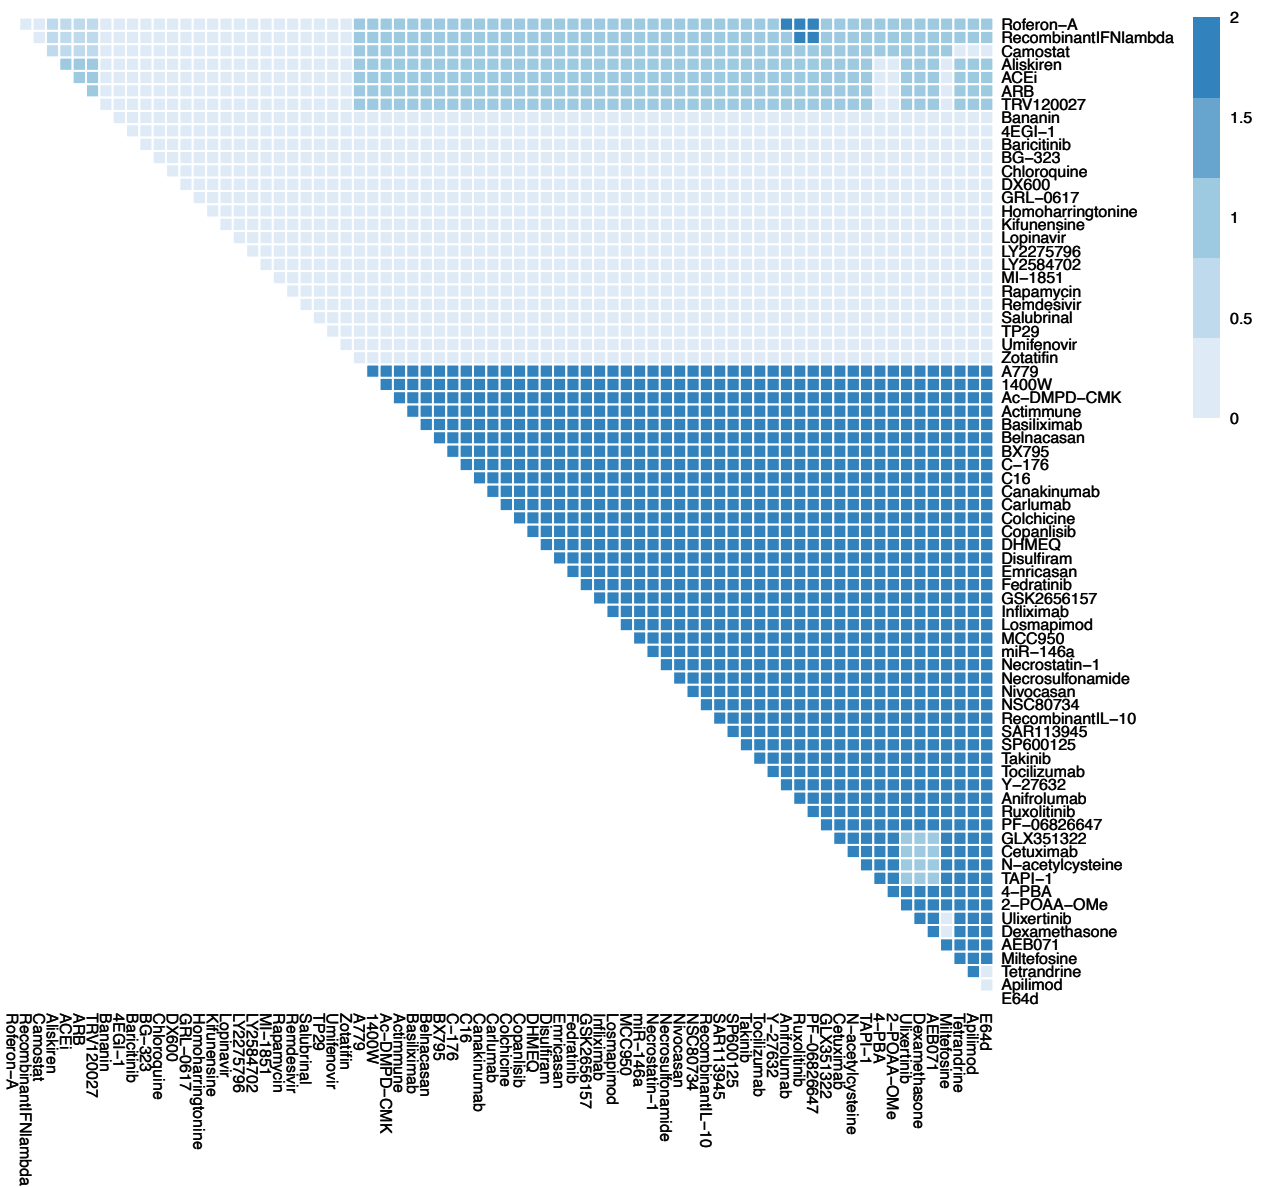

**Supplementary Figure 8m. Effects of combination therapy (74 drugs, including those that have not passed phase II trials) on Syncytia Formation in early stage, severe COVID-19.** The colour of the square corresponds to the level of the *SyncytiaFormation* node at steady state under treatment by the drugs indicated on the x- and y-axis. This plot shows all drugs, including those at an experimental stage of development.

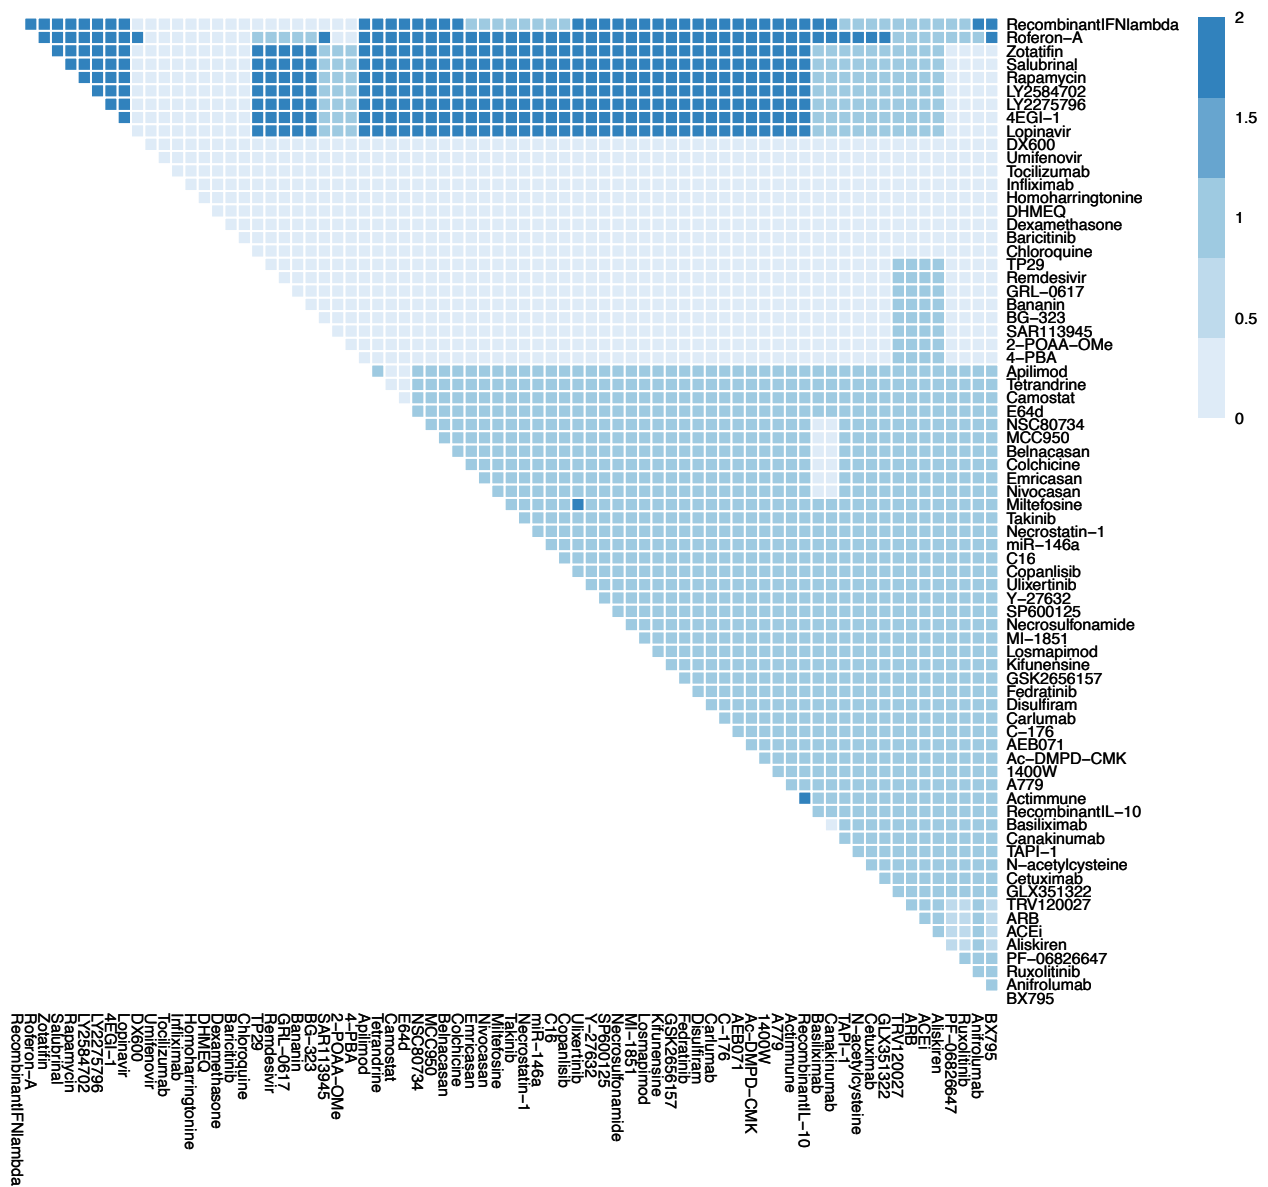

**Supplementary Figure 8n. Effects of combination therapy (74 drugs, including those that have not passed phase II trials) on T-cell Infiltration in early stage, severe COVID-19.** The colour of the square corresponds to the level of the *T-cellInfiltration* node at steady state under treatment by the drugs indicated on the x- and y-axis. This plot shows all drugs, including those at an experimental stage of development.

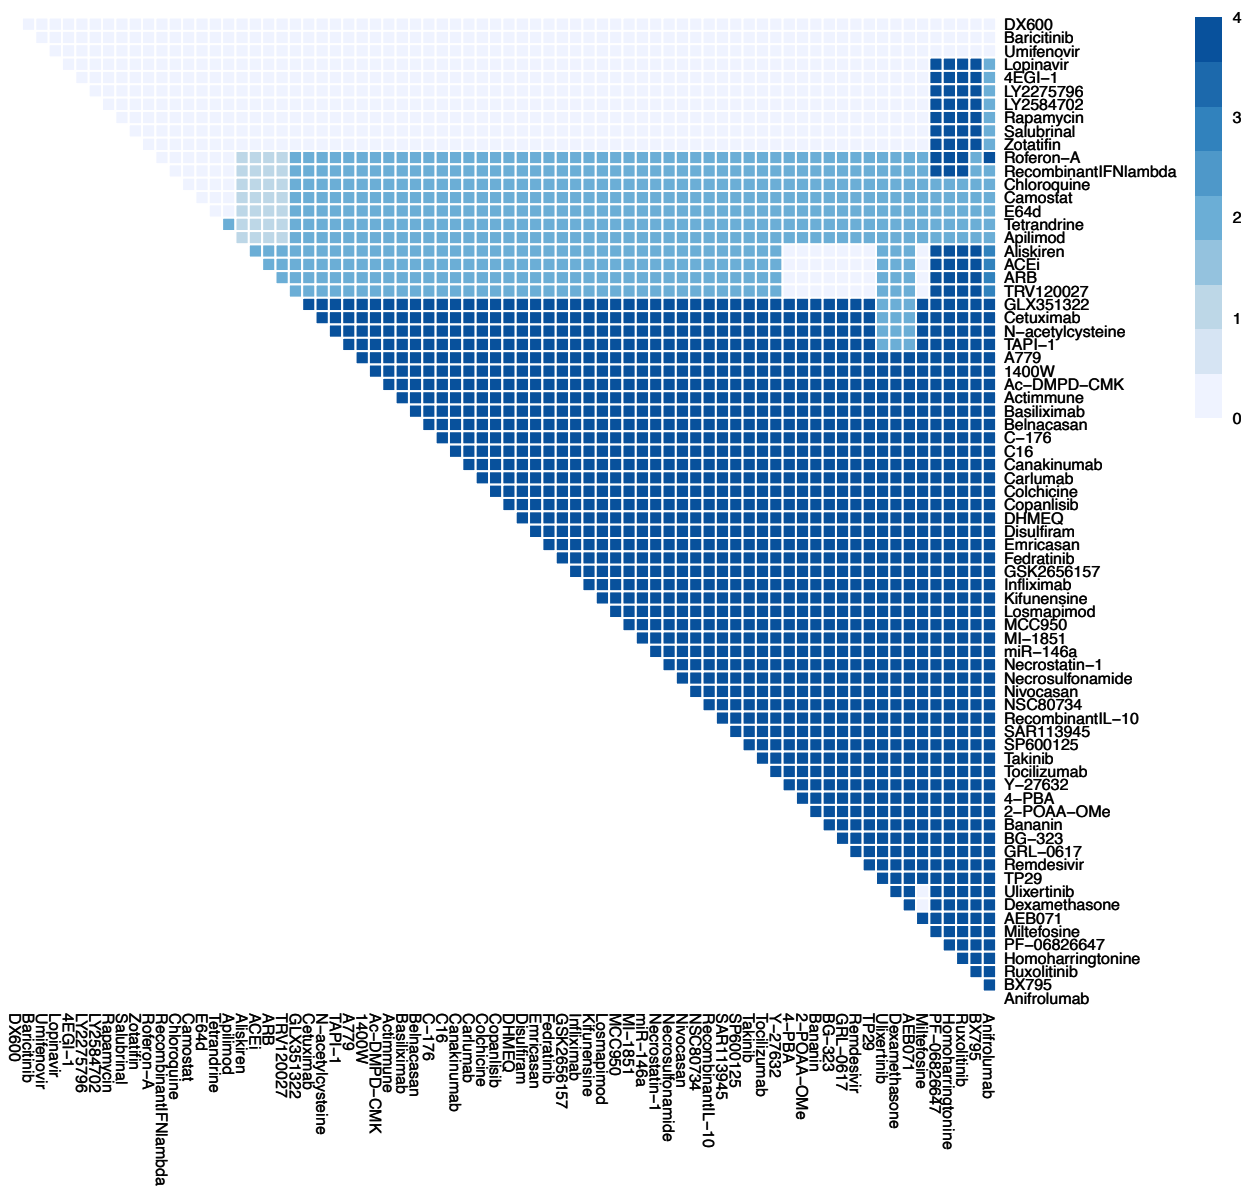

**Supplementary Figure 8o. Effects of combination therapy (74 drugs, including those that have not passed phase II trials) on Viral Entry in early stage, severe COVID-19.** The colour of the square corresponds to the level of the *ViralEntry* node at steady state under treatment by the drugs indicated on the x- and y-axis. This plot shows all drugs, including those at an experimental stage of development.

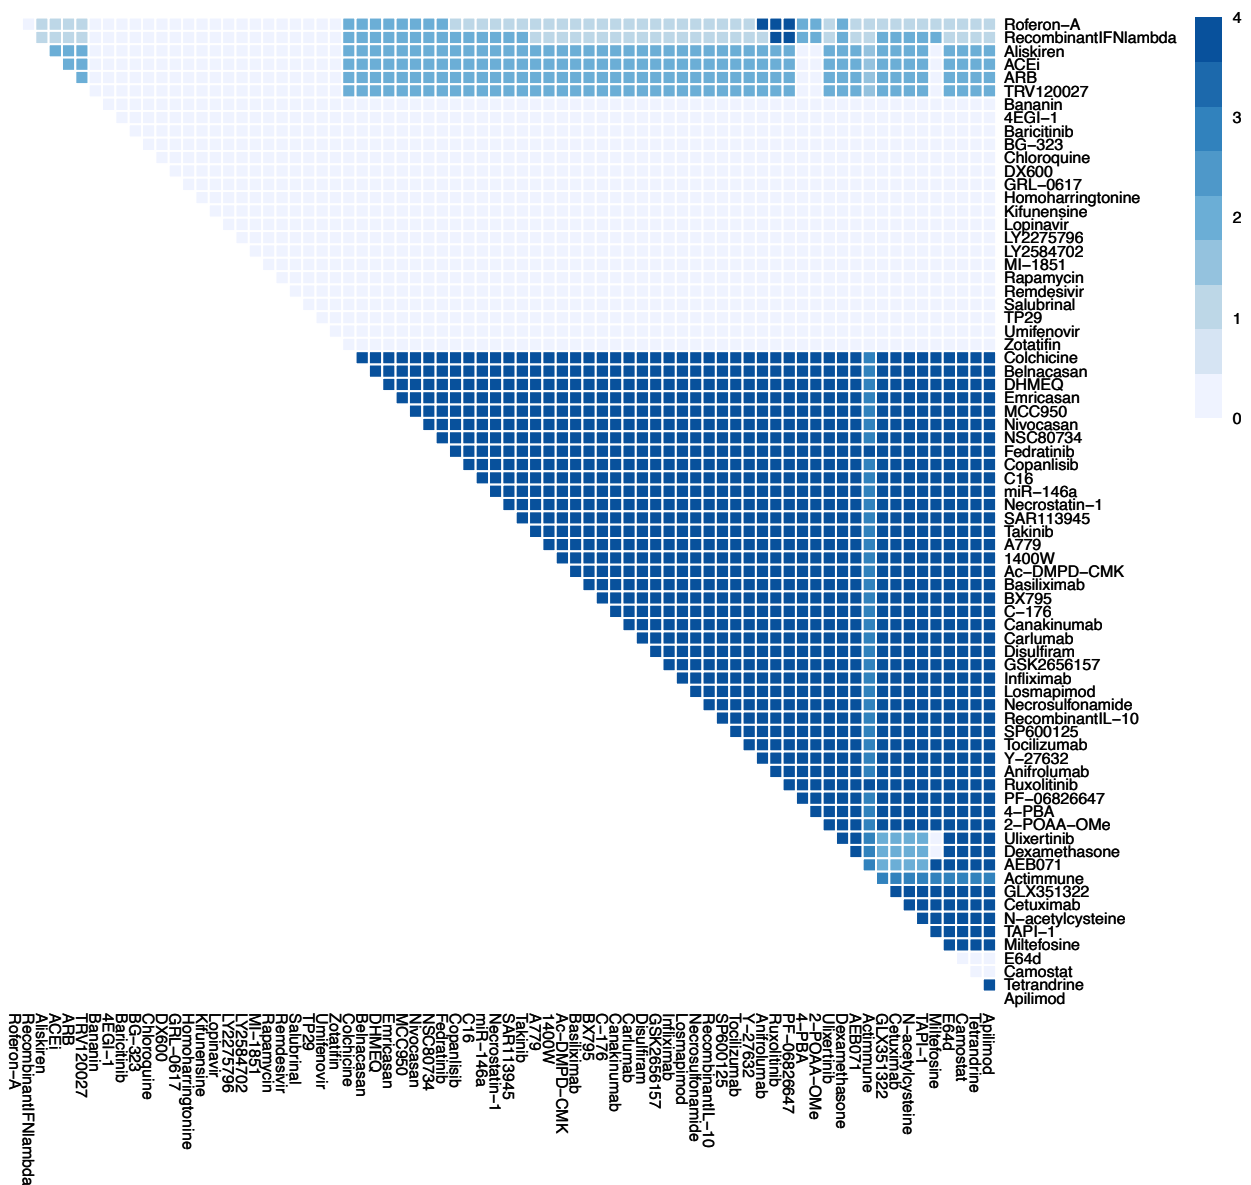

**Supplementary Figure 8p. Effects of combination therapy (74 drugs, including those that have not passed phase II trials) on Viral Replication in early stage, severe COVID-19.** The colour of the square corresponds to the level of the *ViralReplication* node at steady state under treatment by the drugs indicated on the x- and y-axis. This plot shows all drugs, including those at an experimental stage of development.

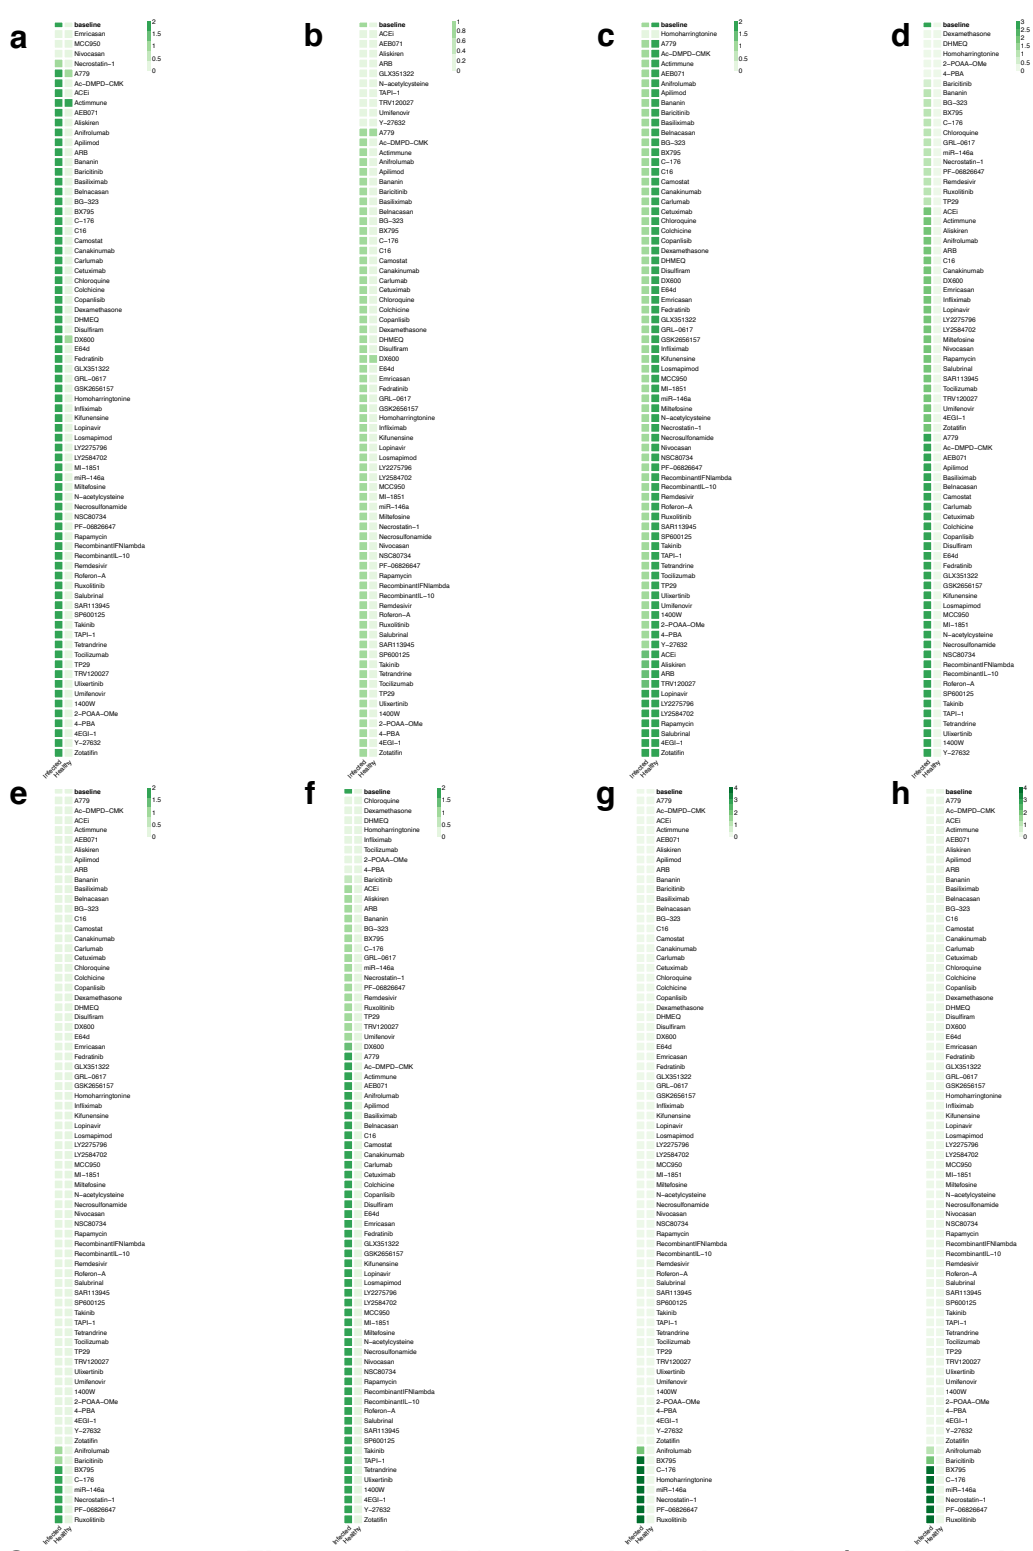

**Supplementary Figure 9 a-h. Effects of single therapies (74 drugs, including those that have not passed phase II trials) in early stage, severe COVID-19.** Columns represent infected and healthy conditions, rows represent drug tested including those at an experimental stage of development (Supplementary Table 5). Showing the effect on: (a) Cell Death. (b) Fibrosis. (c) Host Protein Synthesis. (d) Inflammation. (e) Syncytia Formation. (f) T-cell Infiltration. (g) Viral Entry. (h) Viral Replication.

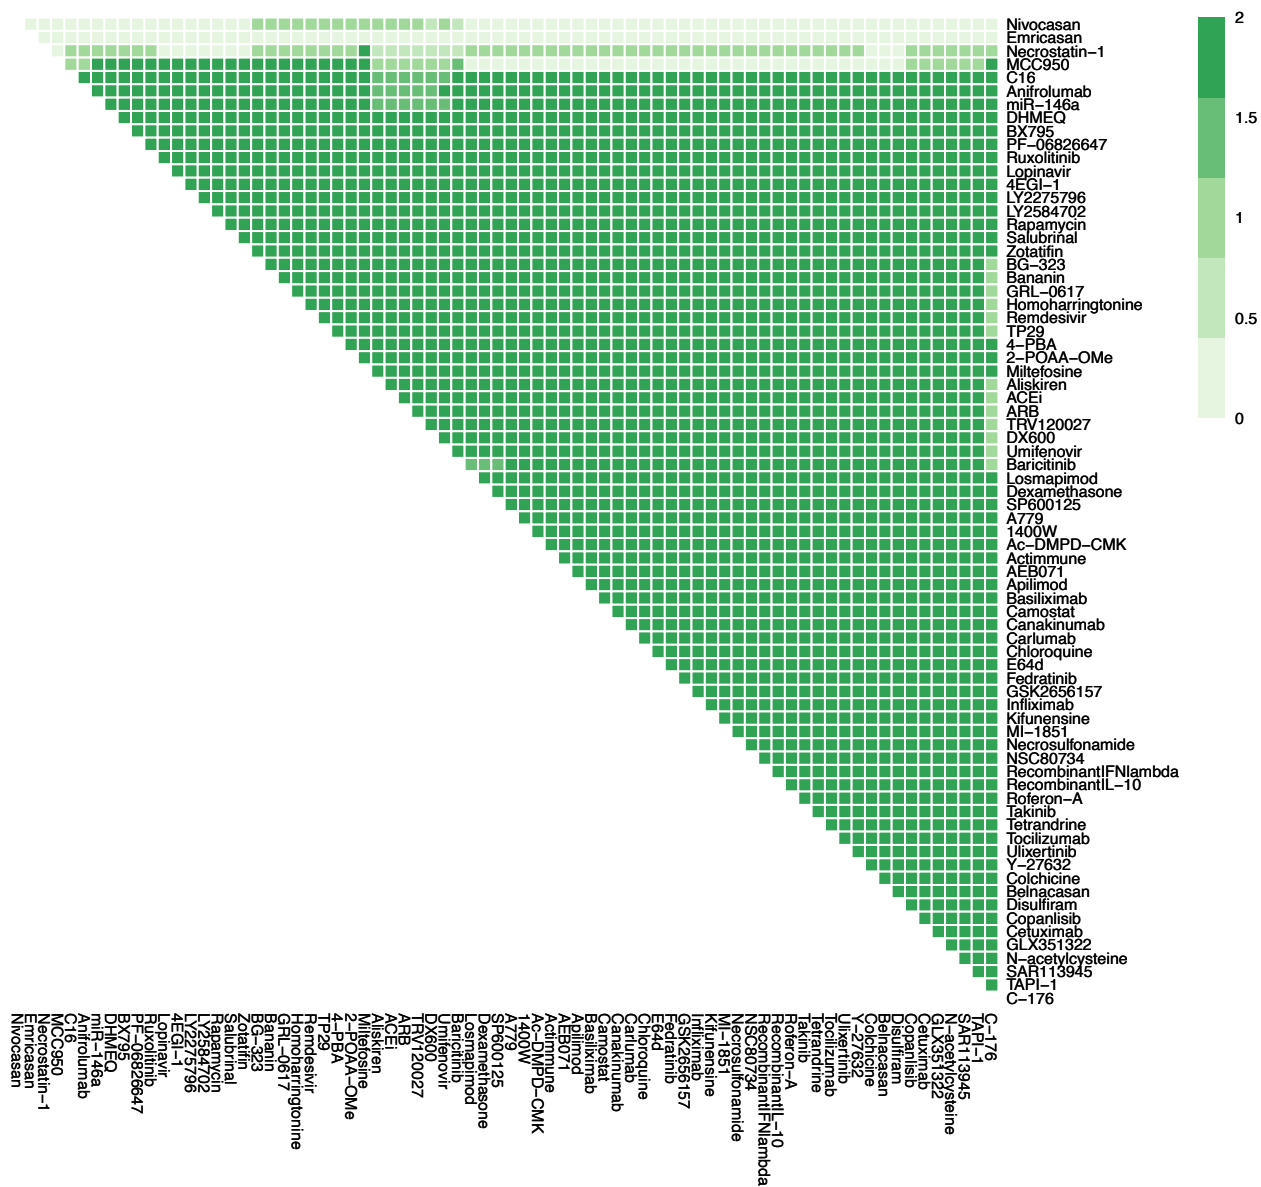

**Supplementary Figure 9i. Effects of combination therapy (74 drugs, including those that have not passed phase II trials) on Cell Death in late stage, severe COVID-19.** The colour of the square corresponds to the level of the *CellDeath* node at steady state under treatment by the drugs indicated on the x- and y-axis. This plot shows all drugs, including those at an experimental stage of development.

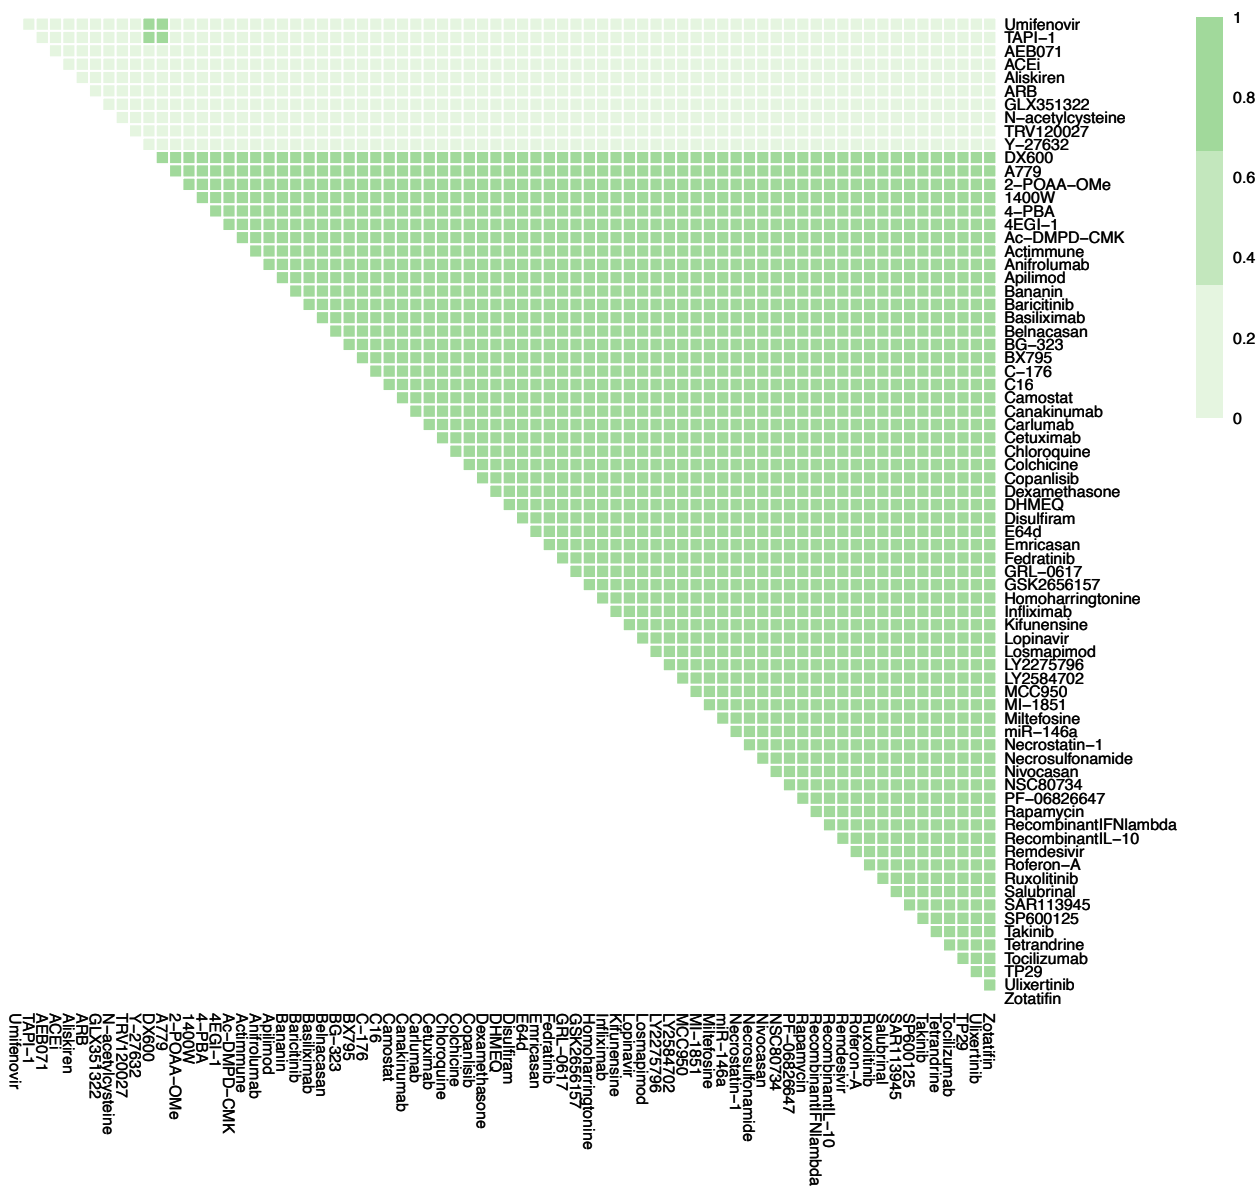

**Supplementary Figure 9j. Effects of combination therapy (74 drugs, including those that have not passed phase II trials) on Fibrosis in late stage, severe COVID-19.** The colour of the square corresponds to the level of the *Fibrosis* node at steady state under treatment by the drugs indicated on the x- and y-axis. This plot shows all drugs, including those at an experimental stage of development.

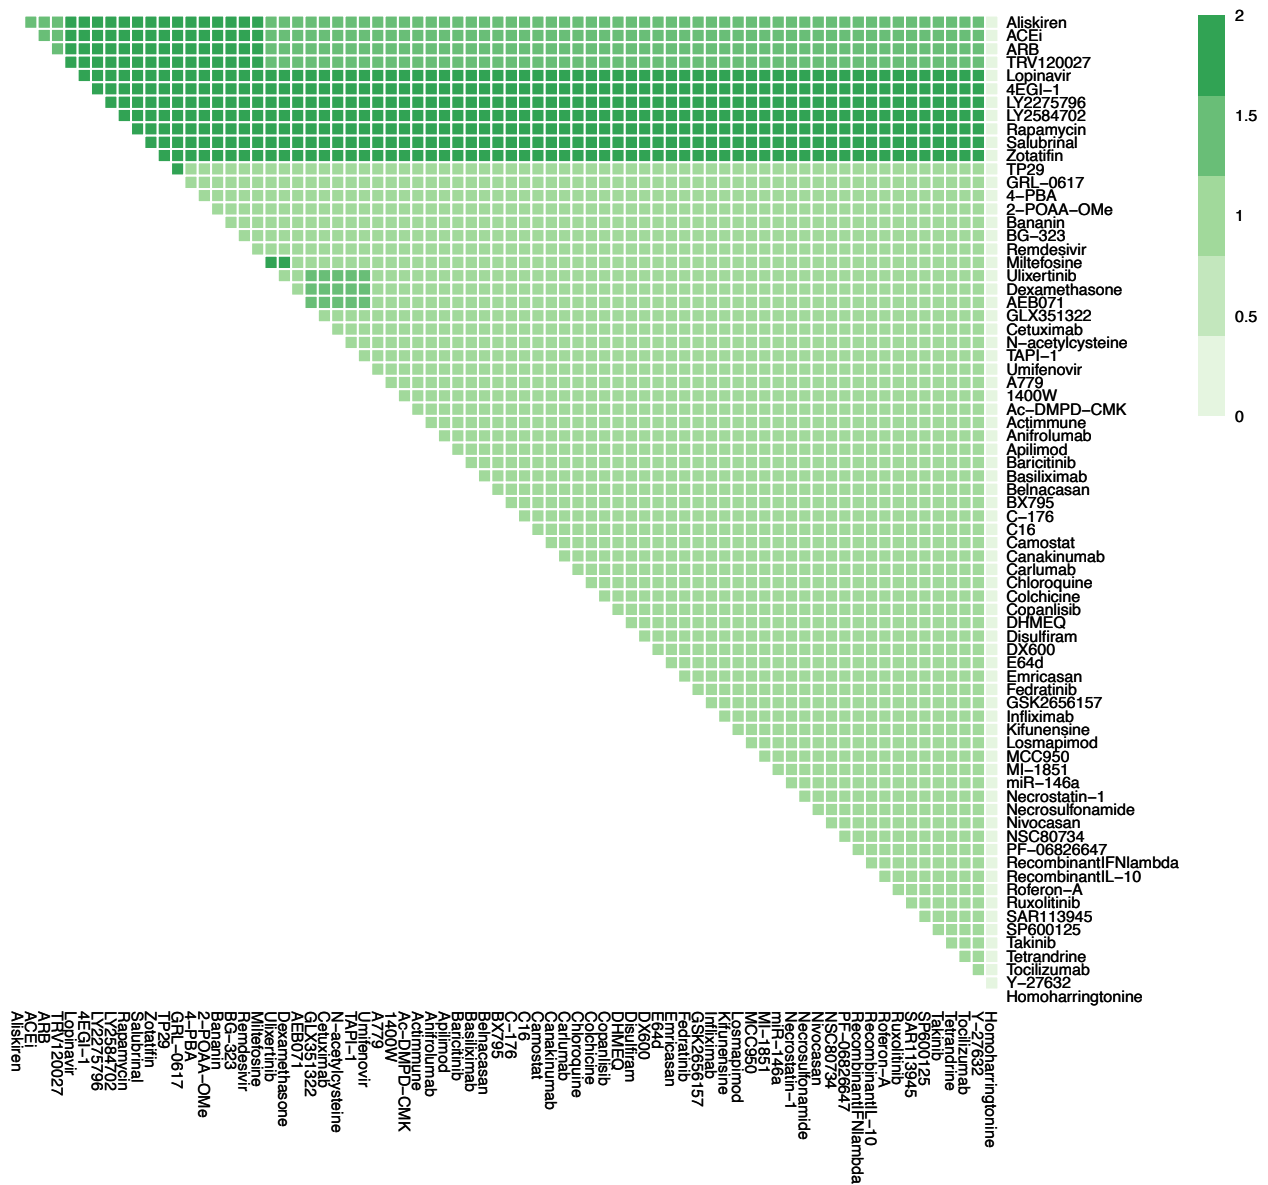

**Supplementary Figure 9k. Effects of combination therapy (74 drugs, including those that have not passed phase II trials) on Host Protein Synthesis in late stage, severe COVID-19.** The colour of the square corresponds to the level of the *Host Protein Synthesis* node at steady state under treatment by the drugs indicated on the x- and y-axis. This plot shows all drugs, including those at an experimental stage of development.



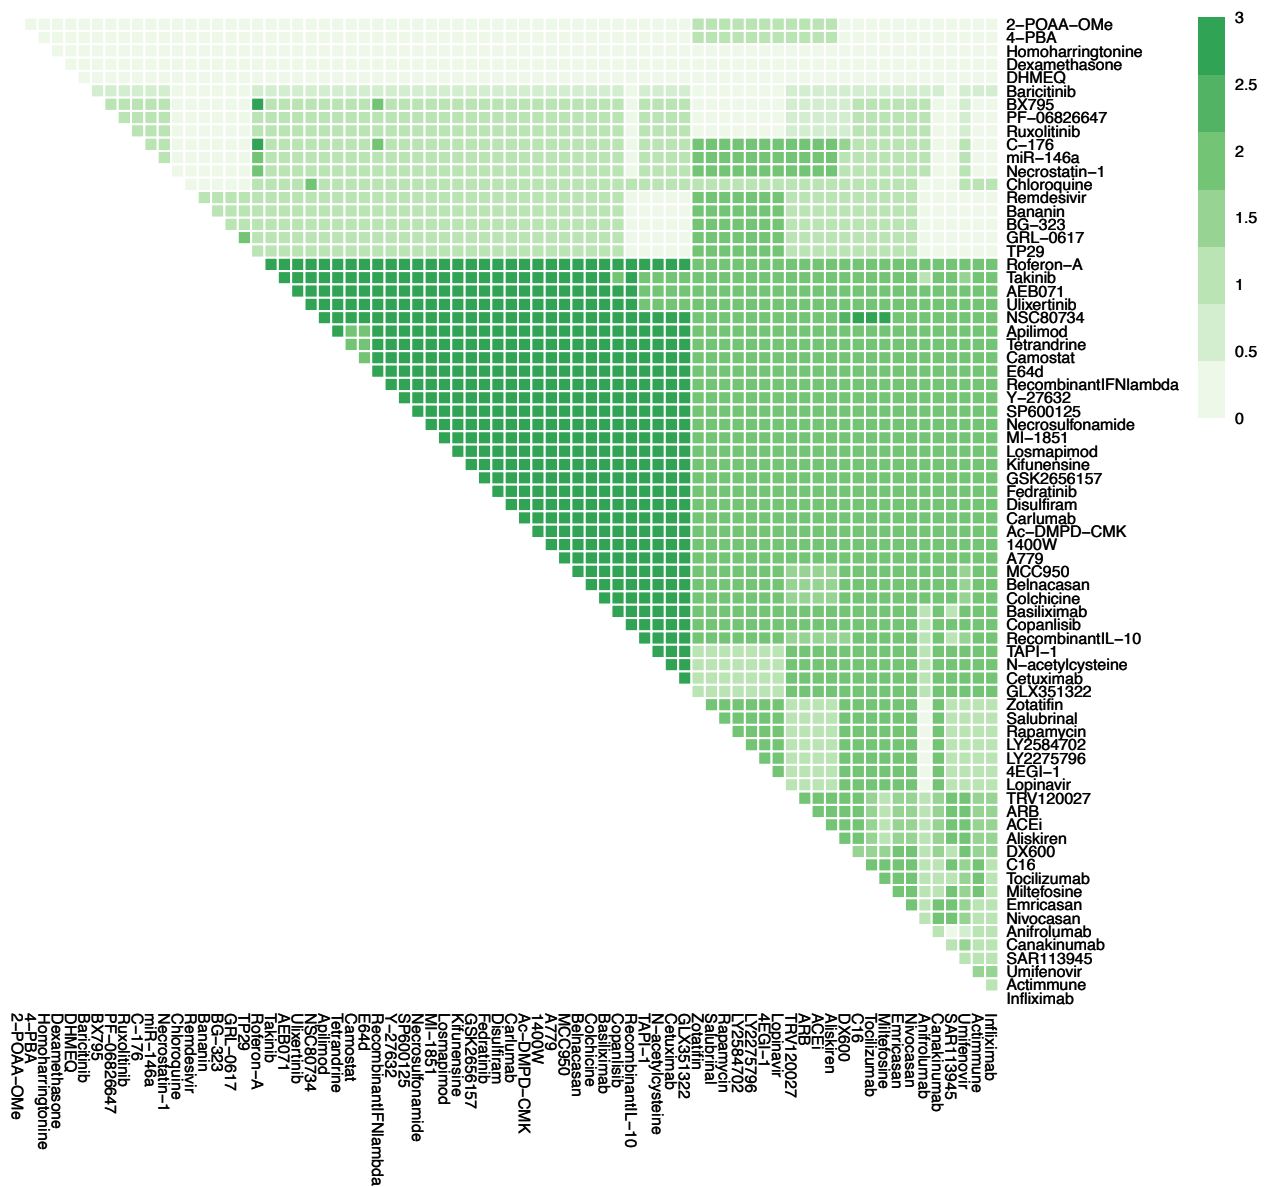

**Supplementary Figure 9I. Effects of combination therapy (74 drugs, including those that have not passed phase II trials) on Inflammation in late stage, severe COVID-19.** The colour of the square corresponds to the level of the *Inflammation* node at steady state under treatment by the drugs indicated on the x- and y-axis. This plot shows all drugs, including those at an experimental stage of development.

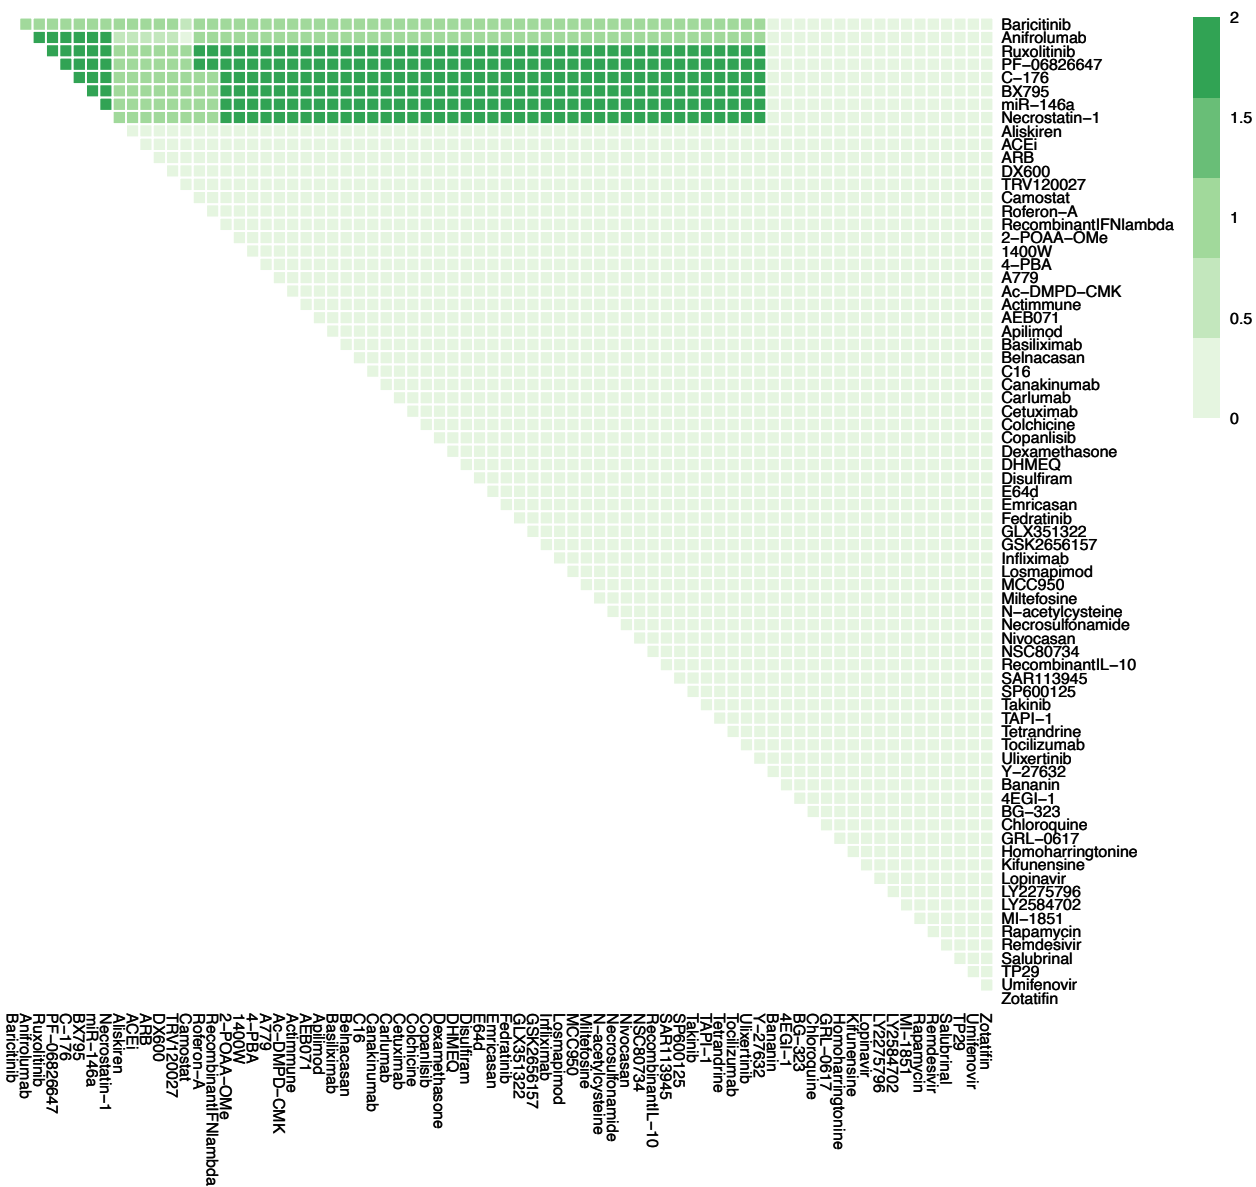

**Supplementary Figure 9m. Effects of combination therapy (74 drugs, including those that have not passed phase II trials) on Syncytia Formation in late stage, severe COVID-19.** The colour of the square corresponds to the level of the *SyncytiaFormation* node at steady state under treatment by the drugs indicated on the x- and y-axis. This plot shows all drugs, including those at an experimental stage of development.

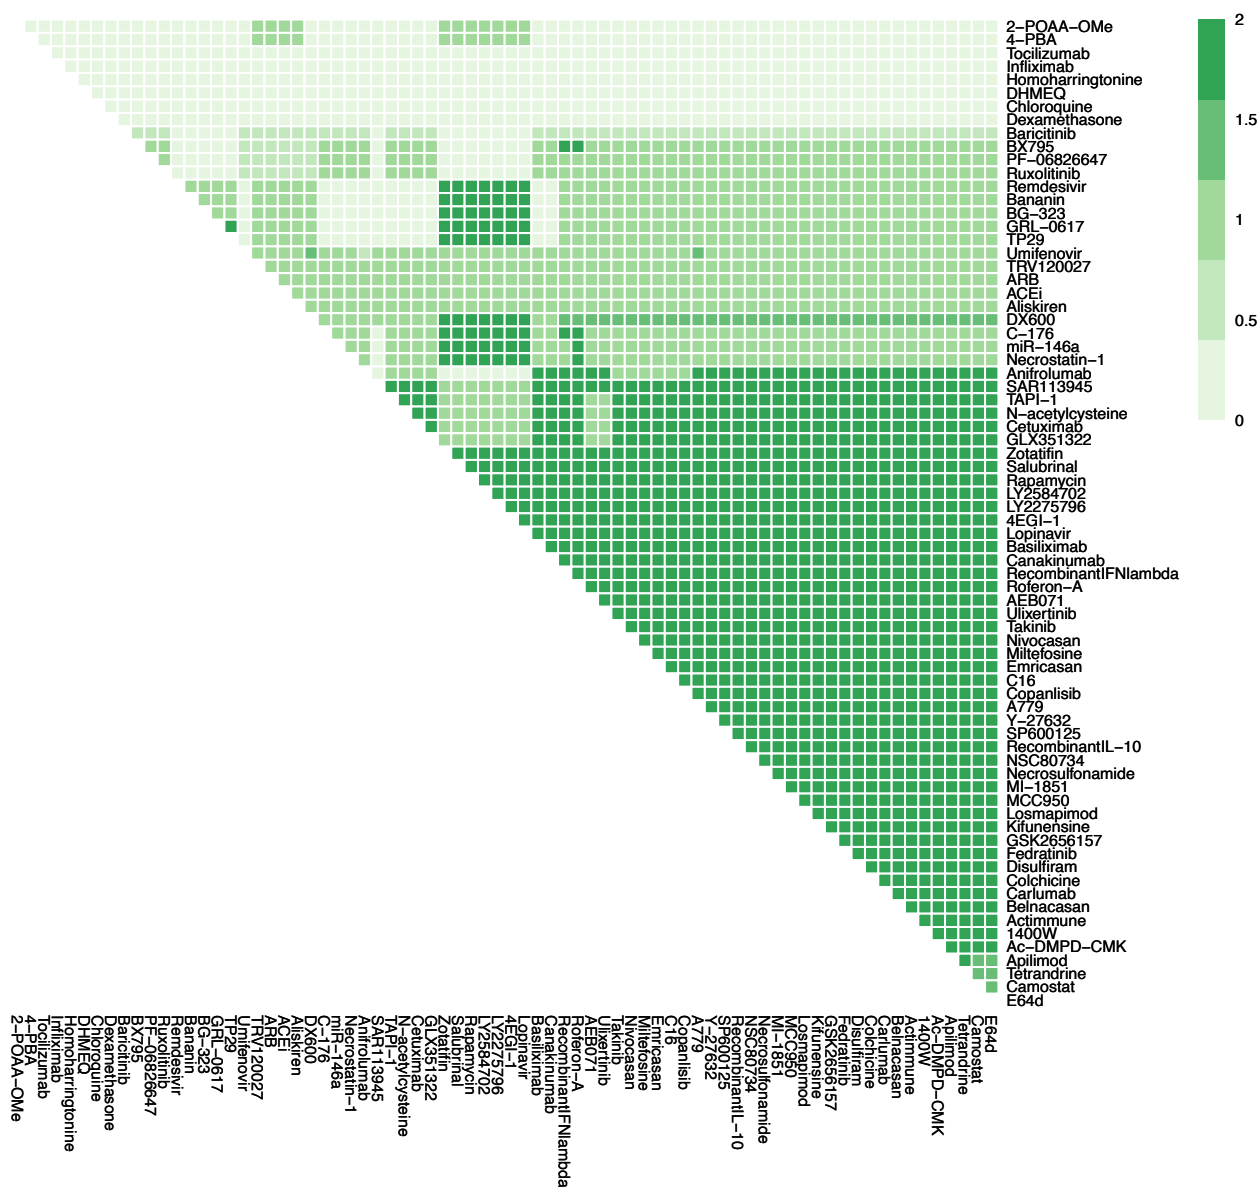

**Supplementary Figure 9n. Effects of combination therapy (74 drugs, including those that have not passed phase II trials) on T-cell Infiltration in late stage, severe COVID-19.** The colour of the square corresponds to the level of the *T-cellInfiltration* node at steady state under treatment by the drugs indicated on the x- and y-axis. This plot shows all drugs, including those at an experimental stage of development.

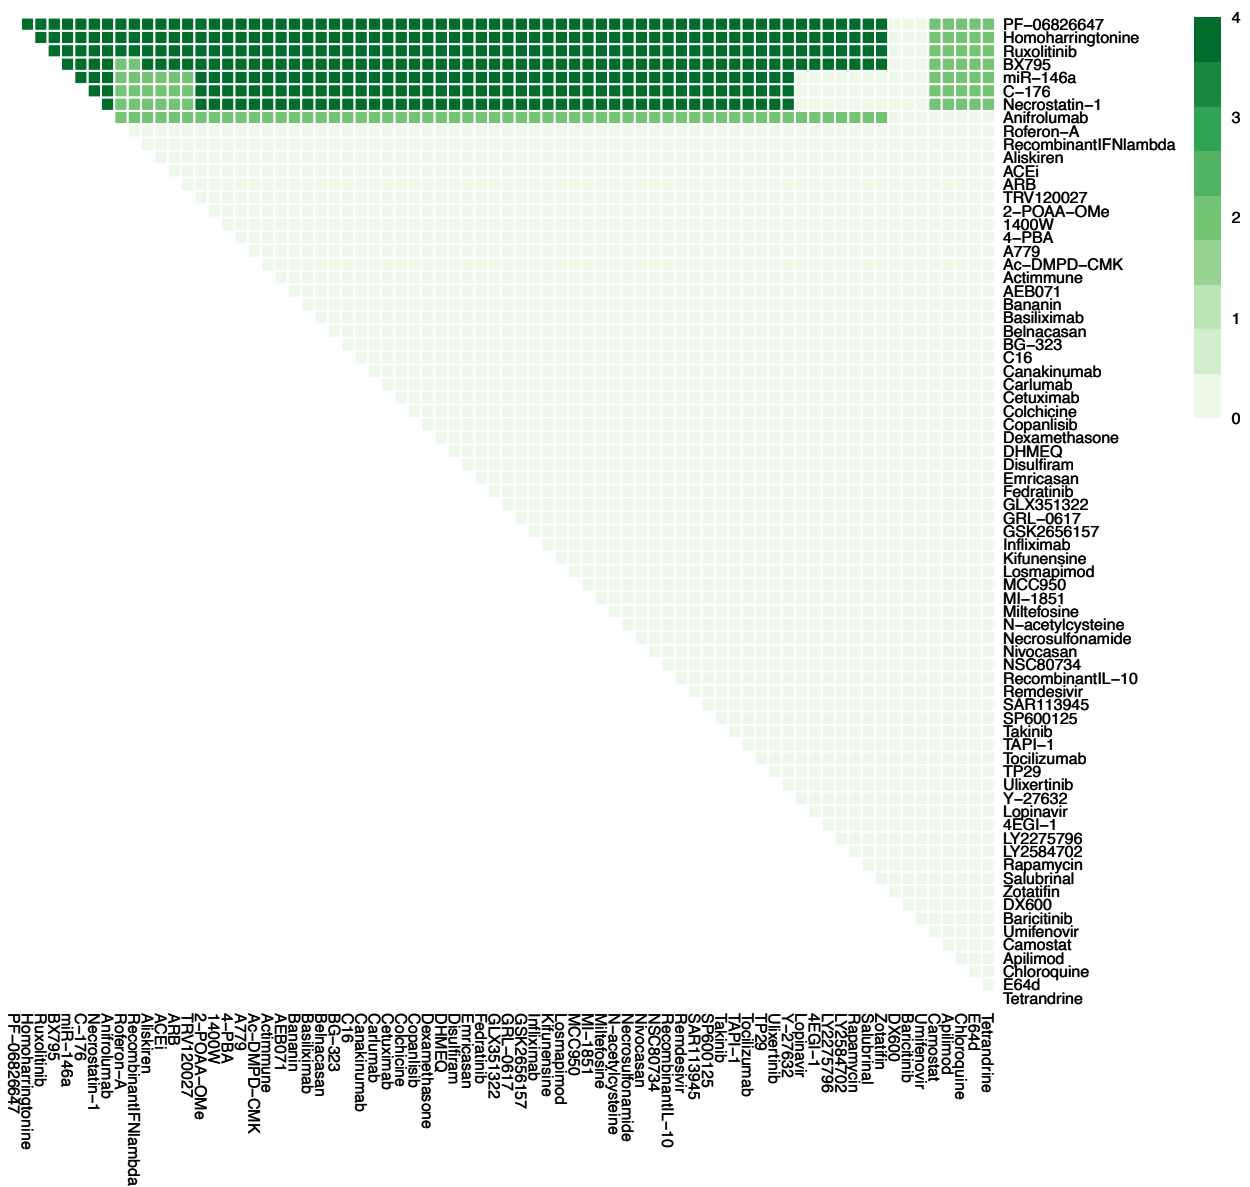

**Supplementary Figure 9o. Effects of combination therapy (74 drugs, including those that have not passed phase II trials) on Viral Entry in late stage, severe COVID-19.** The colour of the square corresponds to the level of the *ViralEntry* node at steady state under treatment by the drugs indicated on the x- and y-axis. This plot shows all drugs, including those at an experimental stage of development.

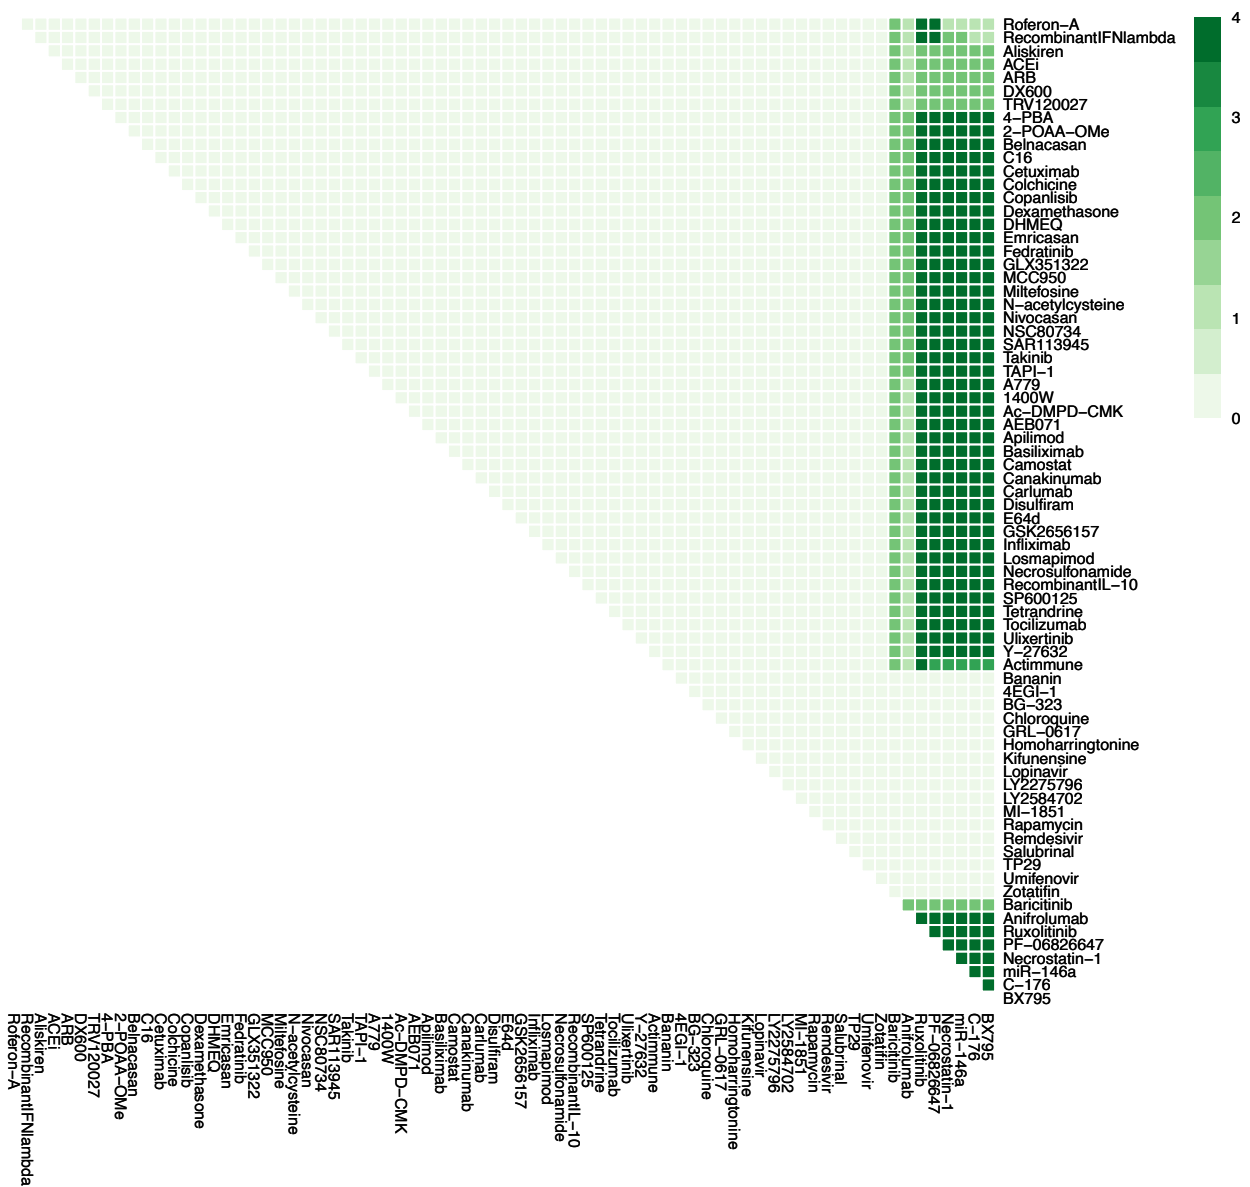

**Supplementary Figure 9p. Effects of combination therapy (74 drugs, including those that have not passed Supplementary phase II trials) on Viral Replication in late stage, severe COVID-19.** The colour of the square corresponds to the level of the *ViralReplication* node at steady state under treatment by the drugs indicated on the x- and y-axis. This plot shows all drugs, including those at an experimental stage of development.

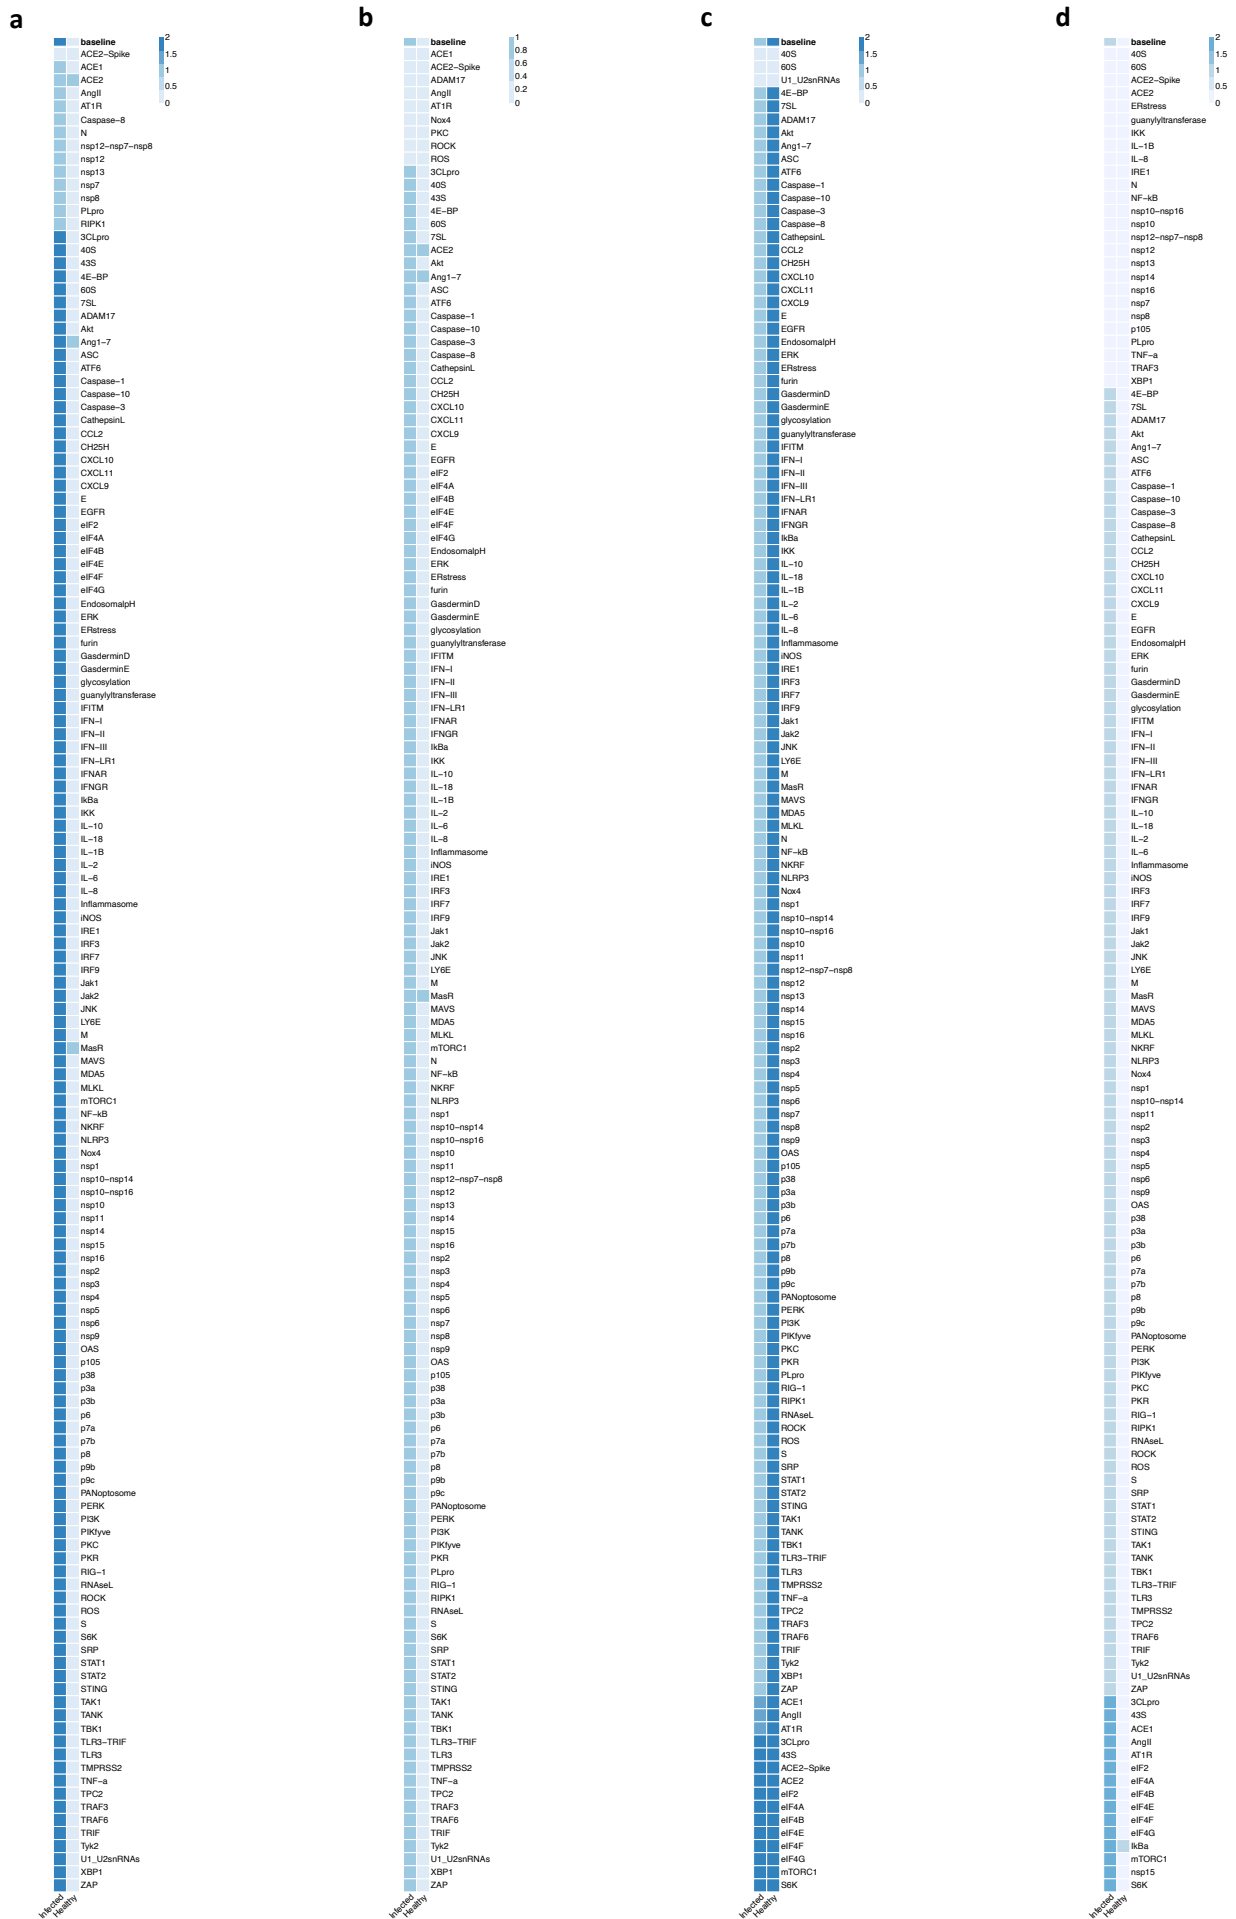

**Supplementary Figure 10 a-d. Effects of single therapies (all nodes) in early stage, severe COVID-19.** Columns represent infected and healthy conditions, rows represent node inhibited. Showing the effect on: **(a)** Cell Death. **(b)** Fibrosis. **(c)** Host Protein Synthesis. **(d)** Inflammation. 62

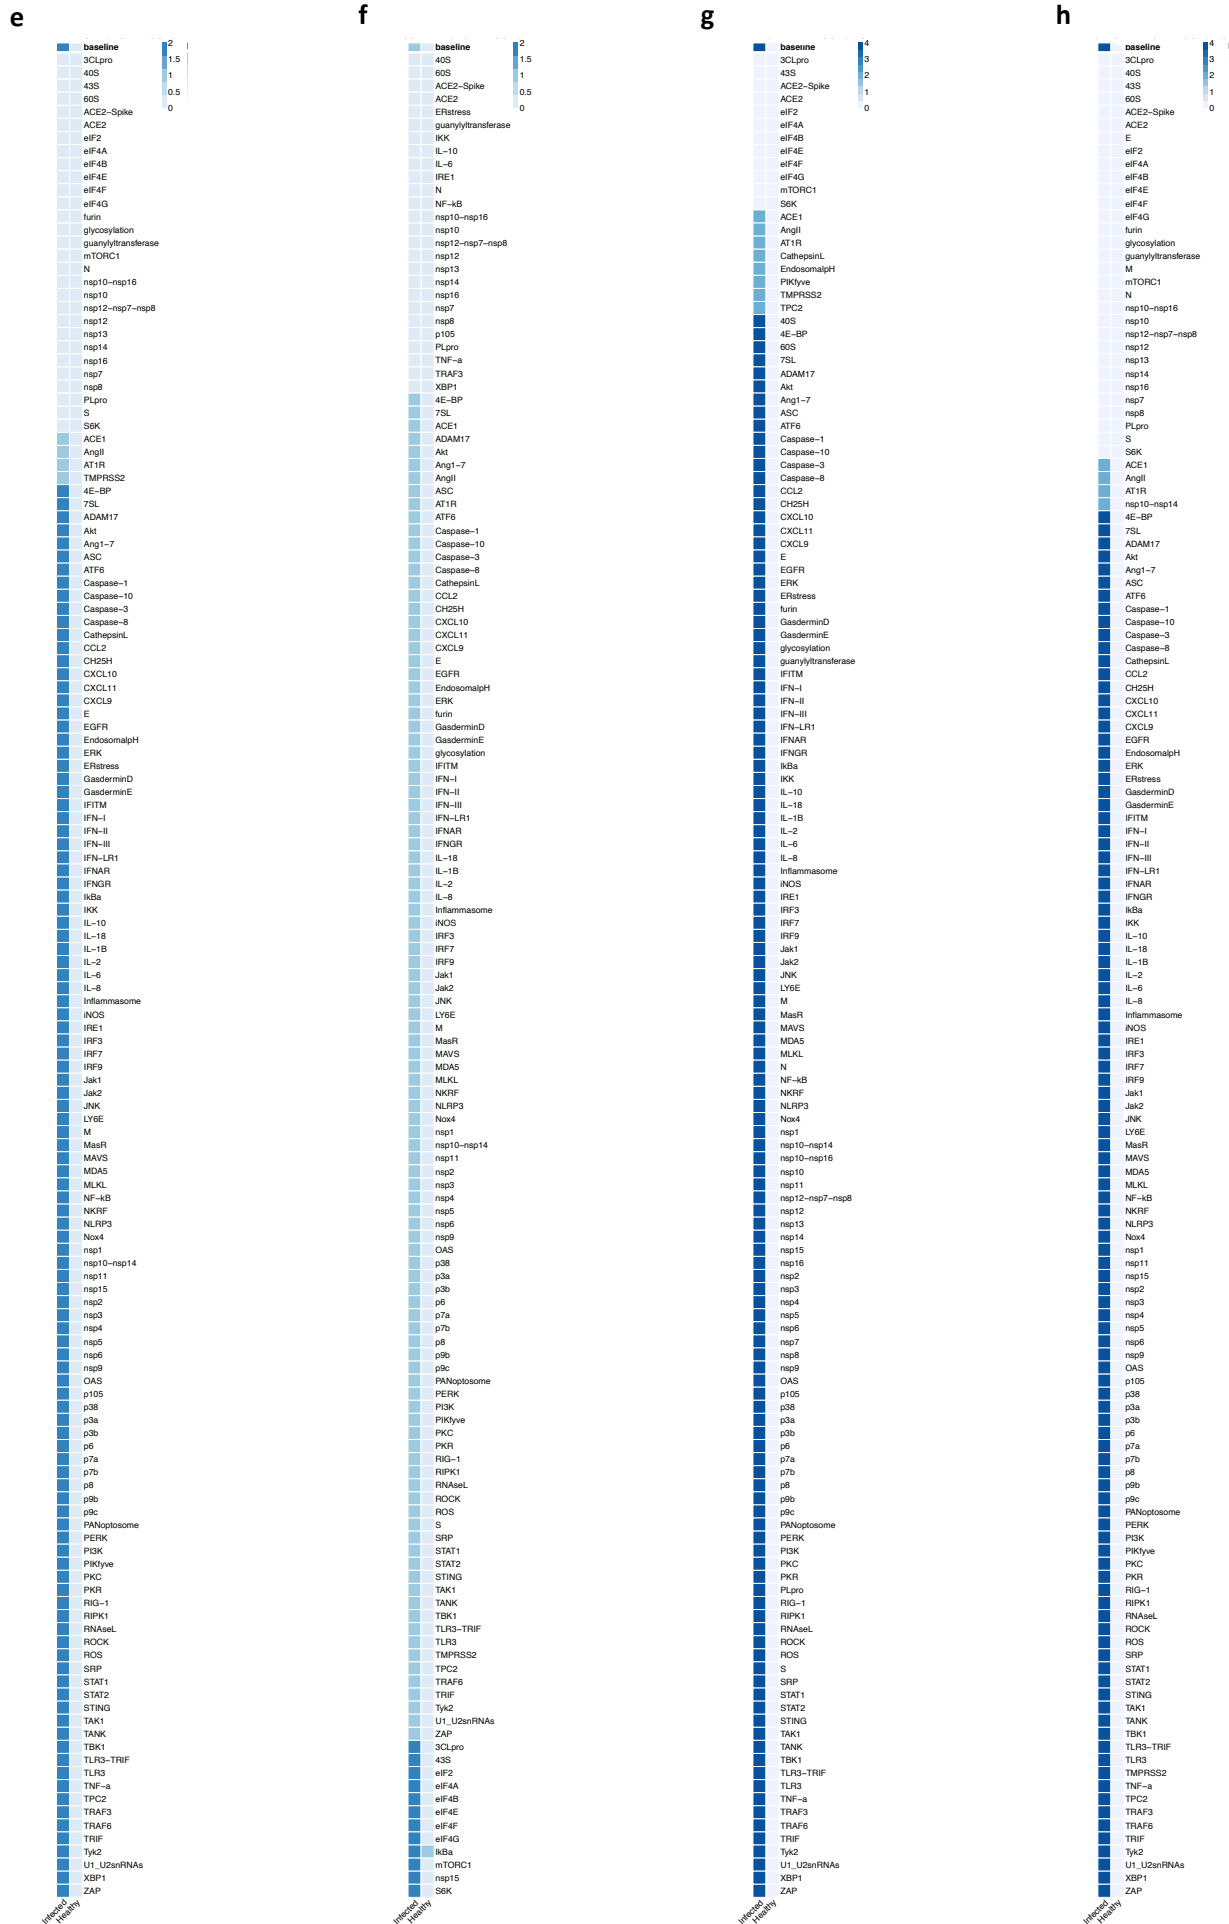

**Supplementary Figure 10 e-h. Effects of single therapies (all nodes) in early stage, severe COVID-19.** Columns represent infected and healthy conditions, rows represent node inhibited. Showing the effect on: **(e)** Syncytia Formation. **(f)** T-cell Infiltration. **(g)** Viral Entry. **(h)** Viral Replication.

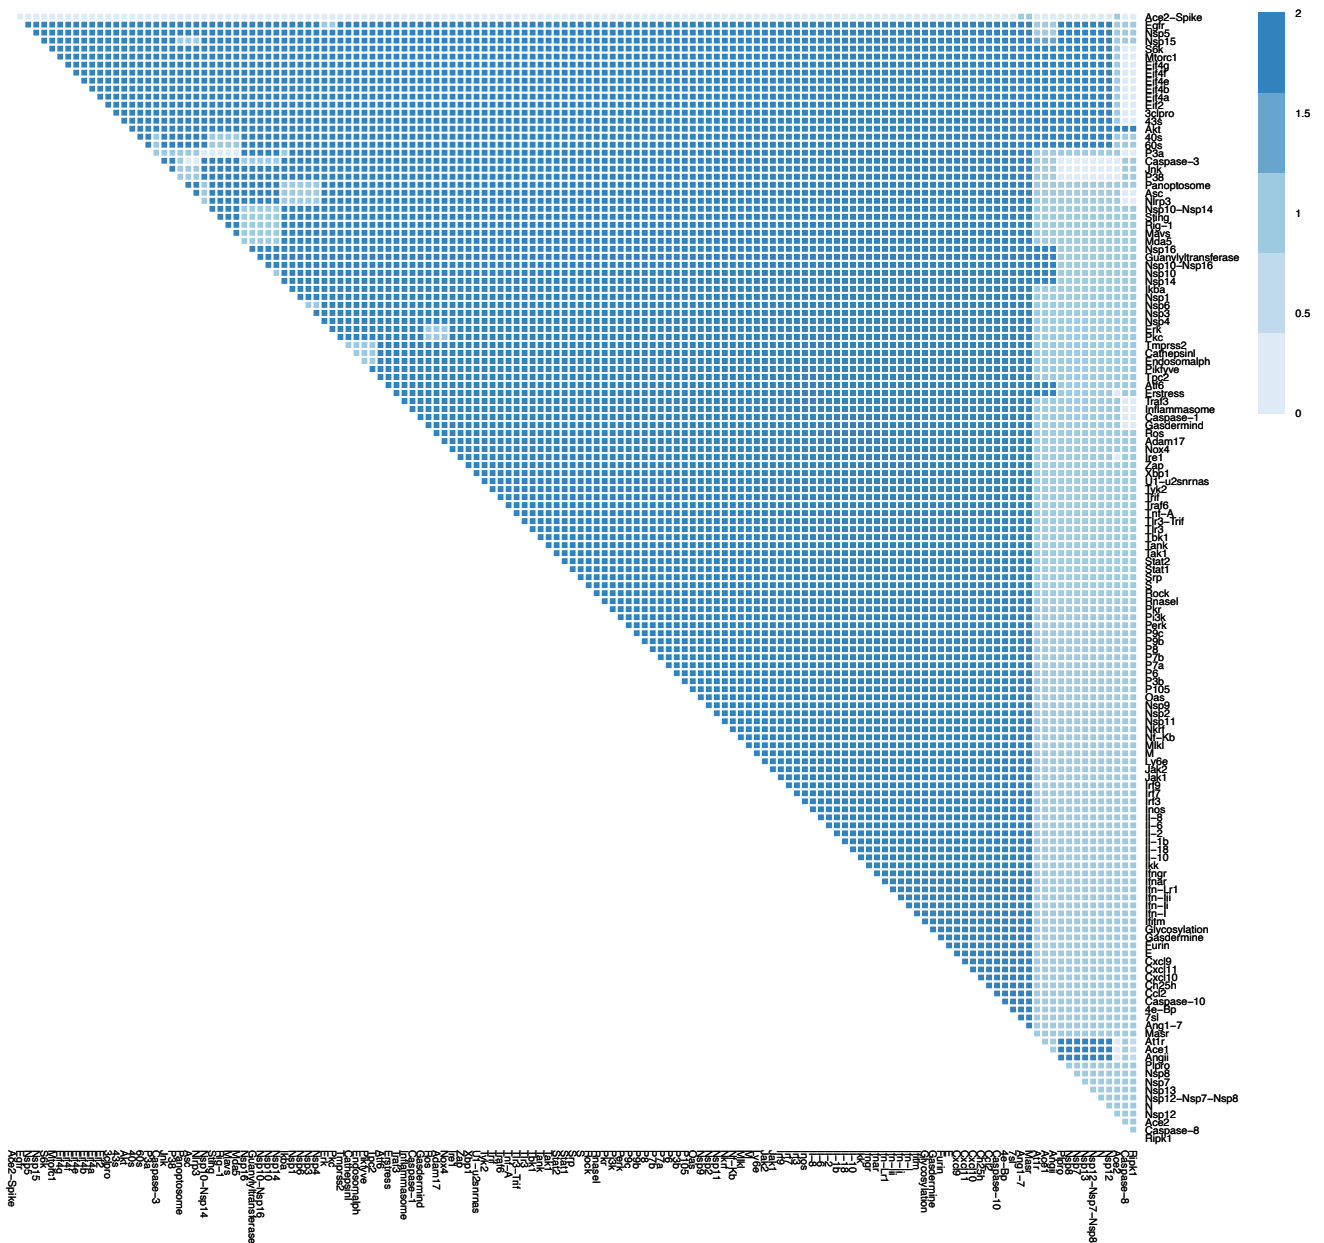

**Supplementary Figure 10i. Effects of combination therapy (all nodes) on Cell Death in early stage, severe COVID-19.** The colour of the square corresponds to the level of the *CellDeath* node at steady state upon inhibition of the nodes indicated on the x- and y-axis. This plot shows inhibition of all nodes representing druggable targets (proteins and complexes).



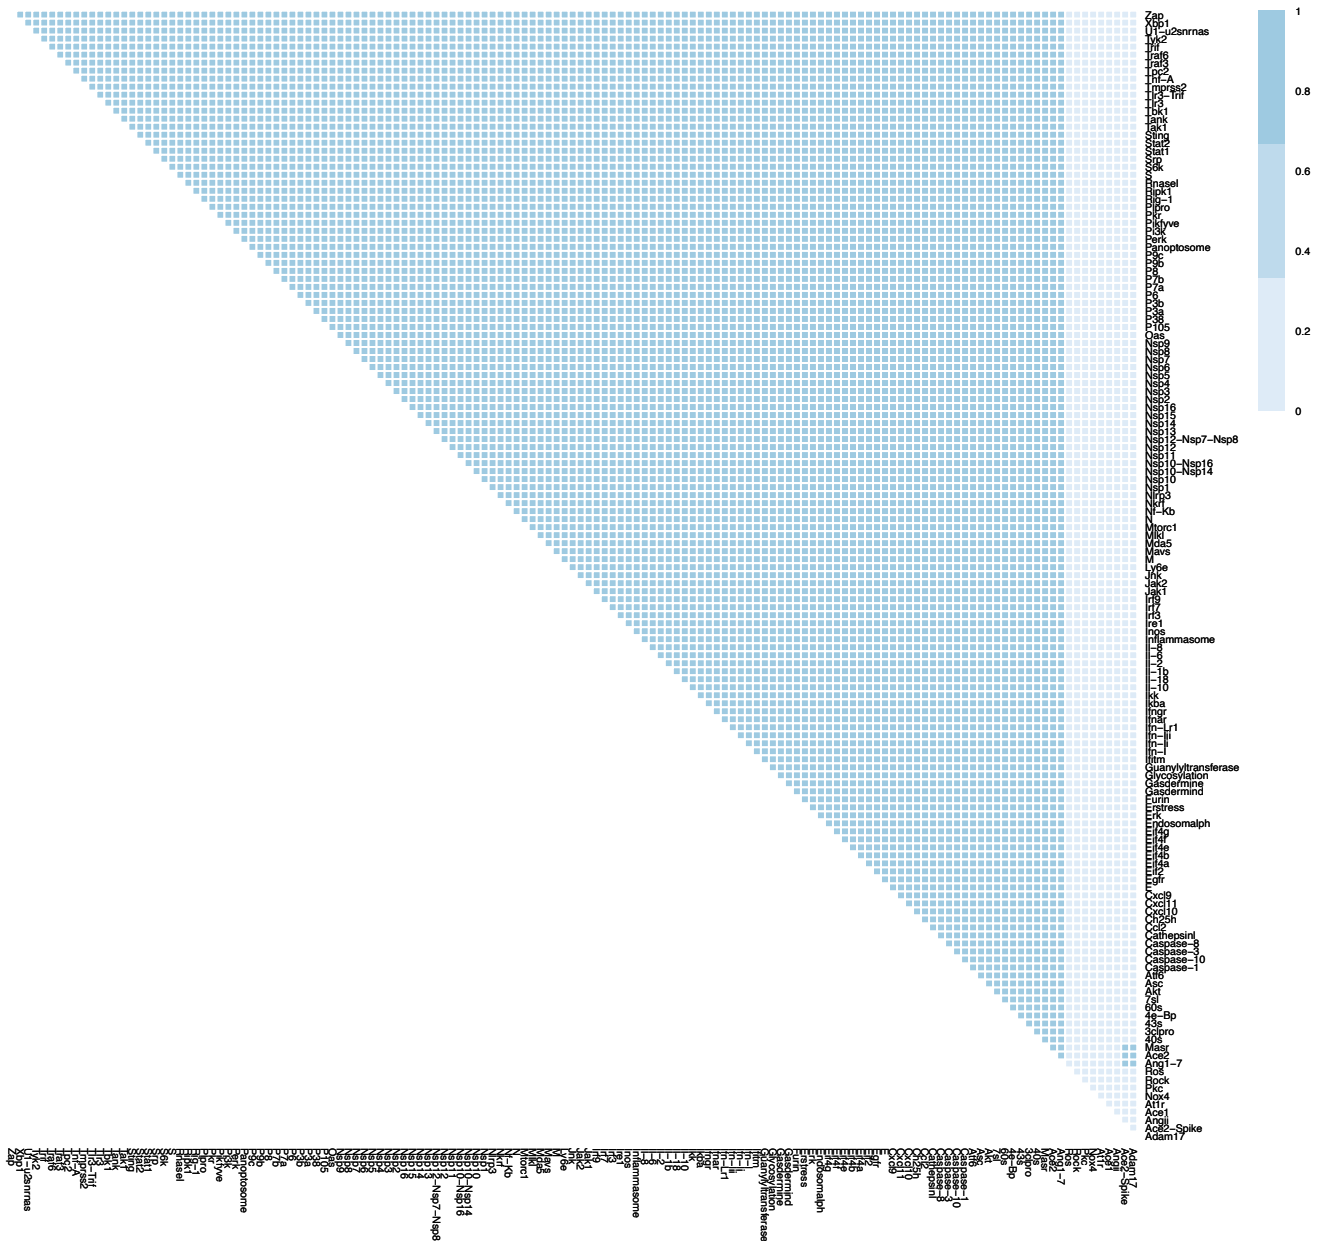

**Supplementary Figure 10j. Effects of combination therapy (all nodes) on Fibrosis in early stage, severe COVID-19.** The colour of the square corresponds to the level of the *Fibrosis* node at steady state upon inhibition of the nodes indicated on the x- and y-axis. This plot shows inhibition of all nodes representing druggable targets (proteins and complexes).

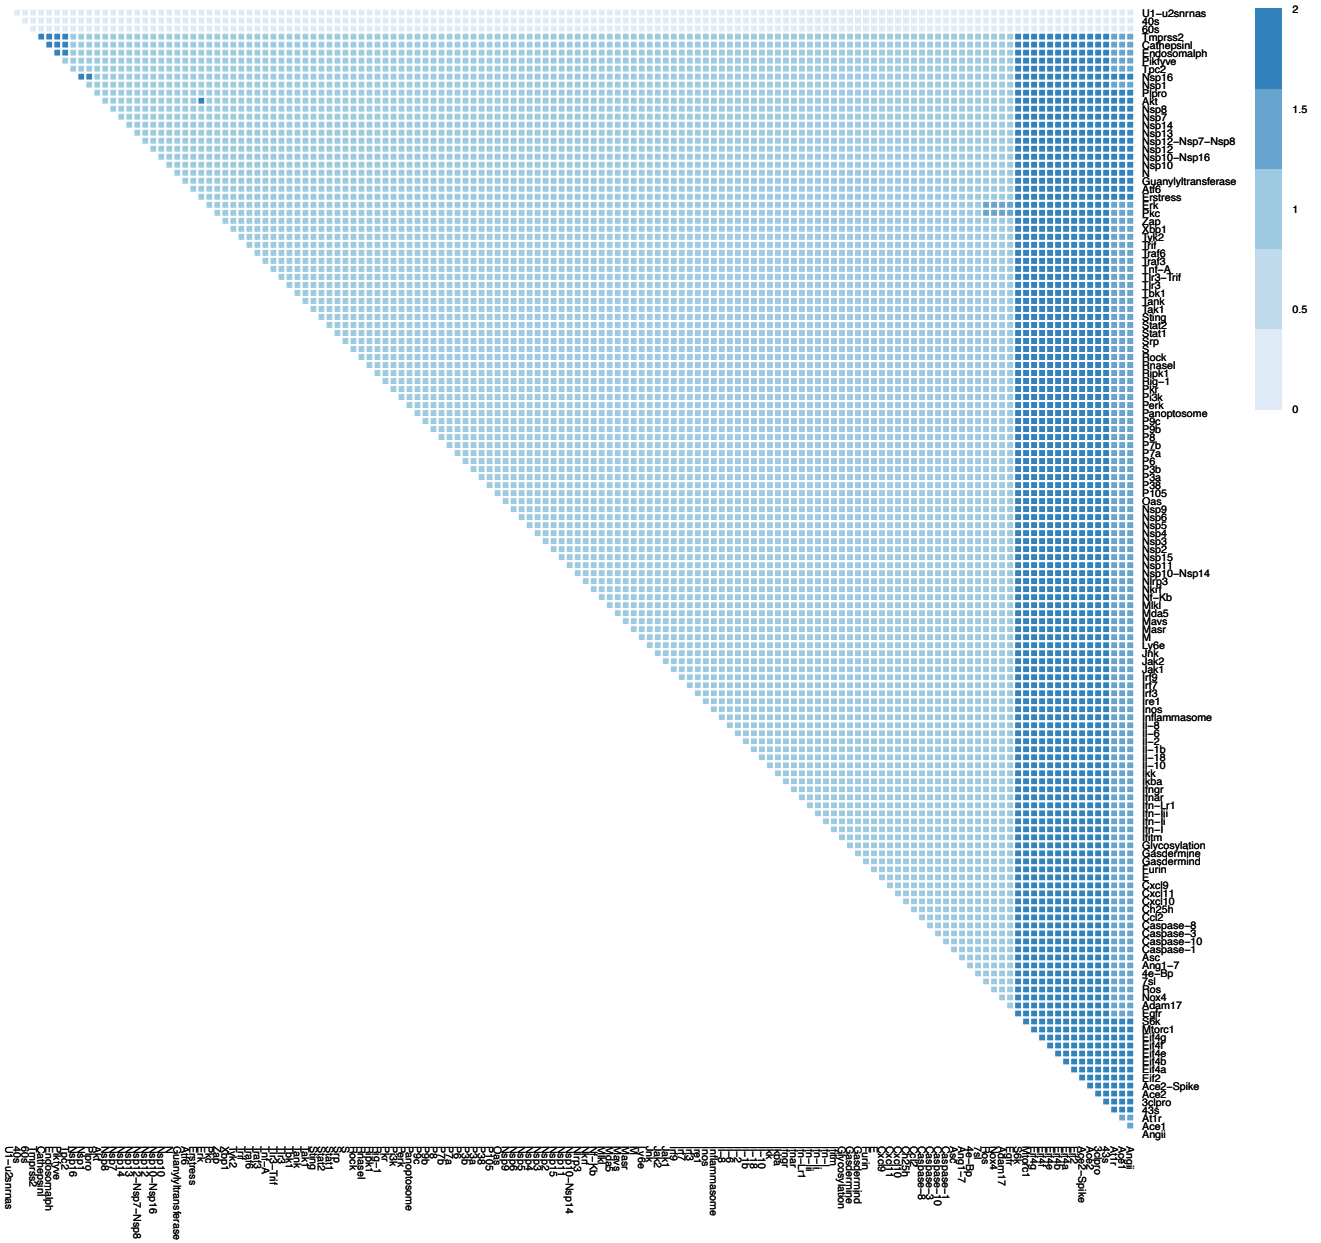

**Supplementary Figure 10k. Effects of combination therapy (all nodes) on Host Protein Synthesis in early stage, severe COVID-19.** The colour of the square corresponds to the level of the *HostProteinSynthesis* node at steady state upon inhibition of the nodes indicated on the x- and y-axis. This plot shows inhibition of all nodes representing druggable targets (proteins and complexes).

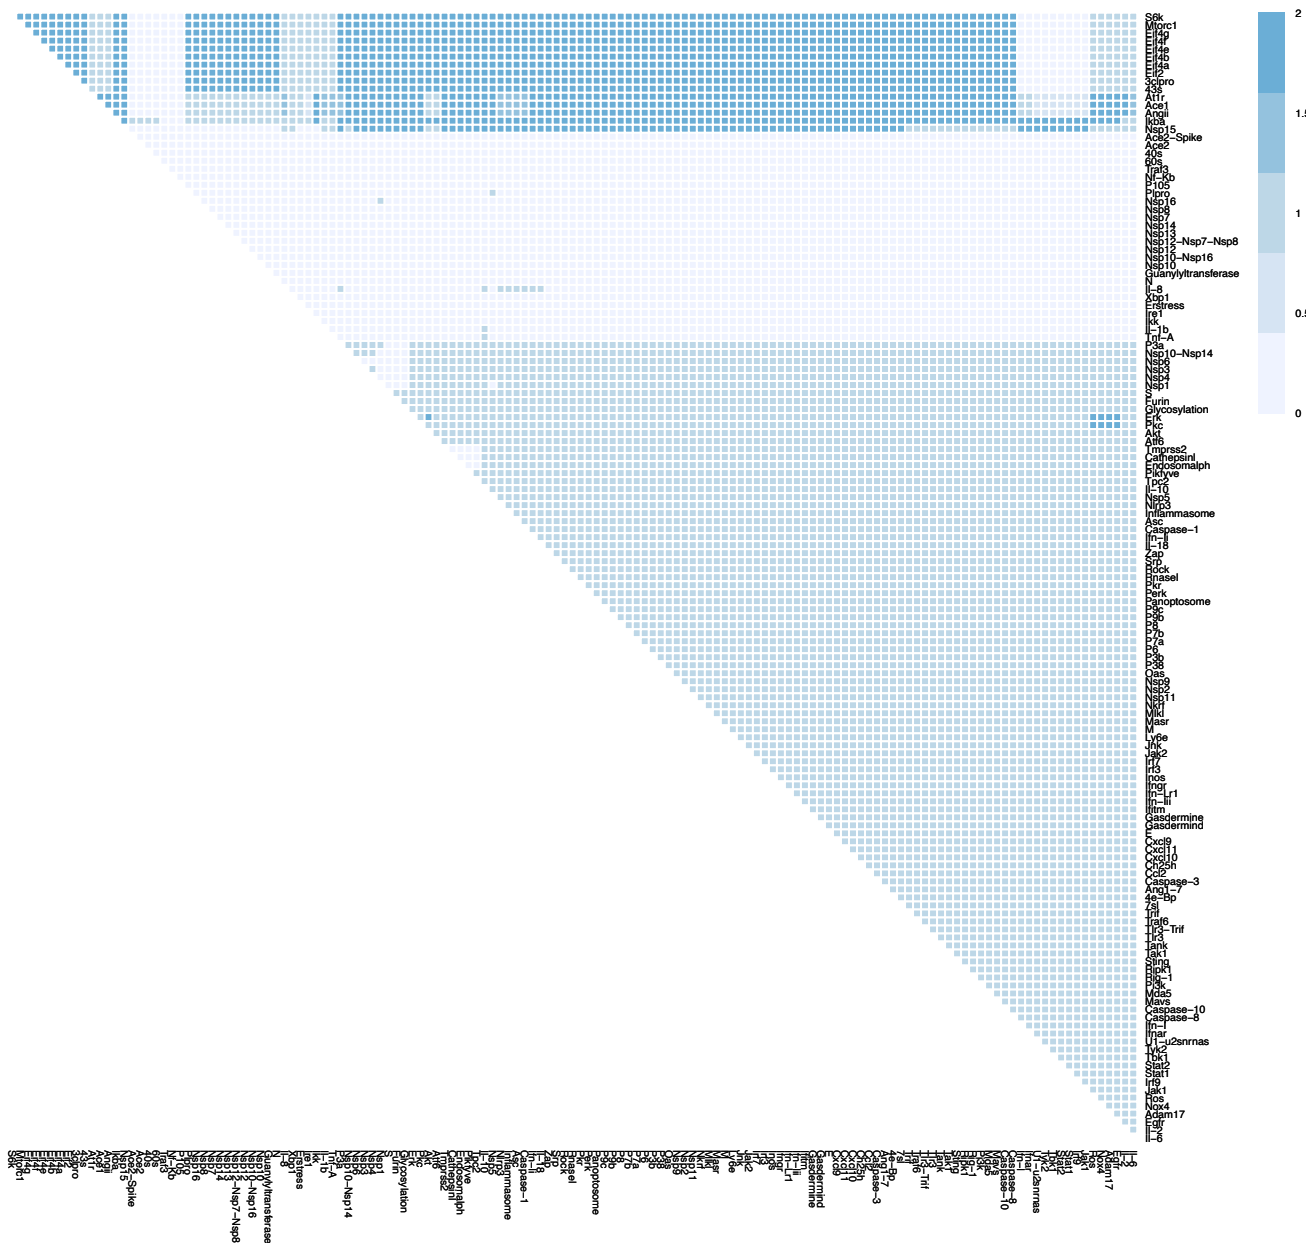

**Supplementary Figure 10I. Effects of combination therapy (all nodes) on Inflammation in early stage, severe COVID-19.** The colour of the square corresponds to the level of the *Inflammation* node at steady state upon inhibition of the nodes indicated on the x- and y-axis. This plot shows inhibition of all nodes representing druggable targets (proteins and complexes).

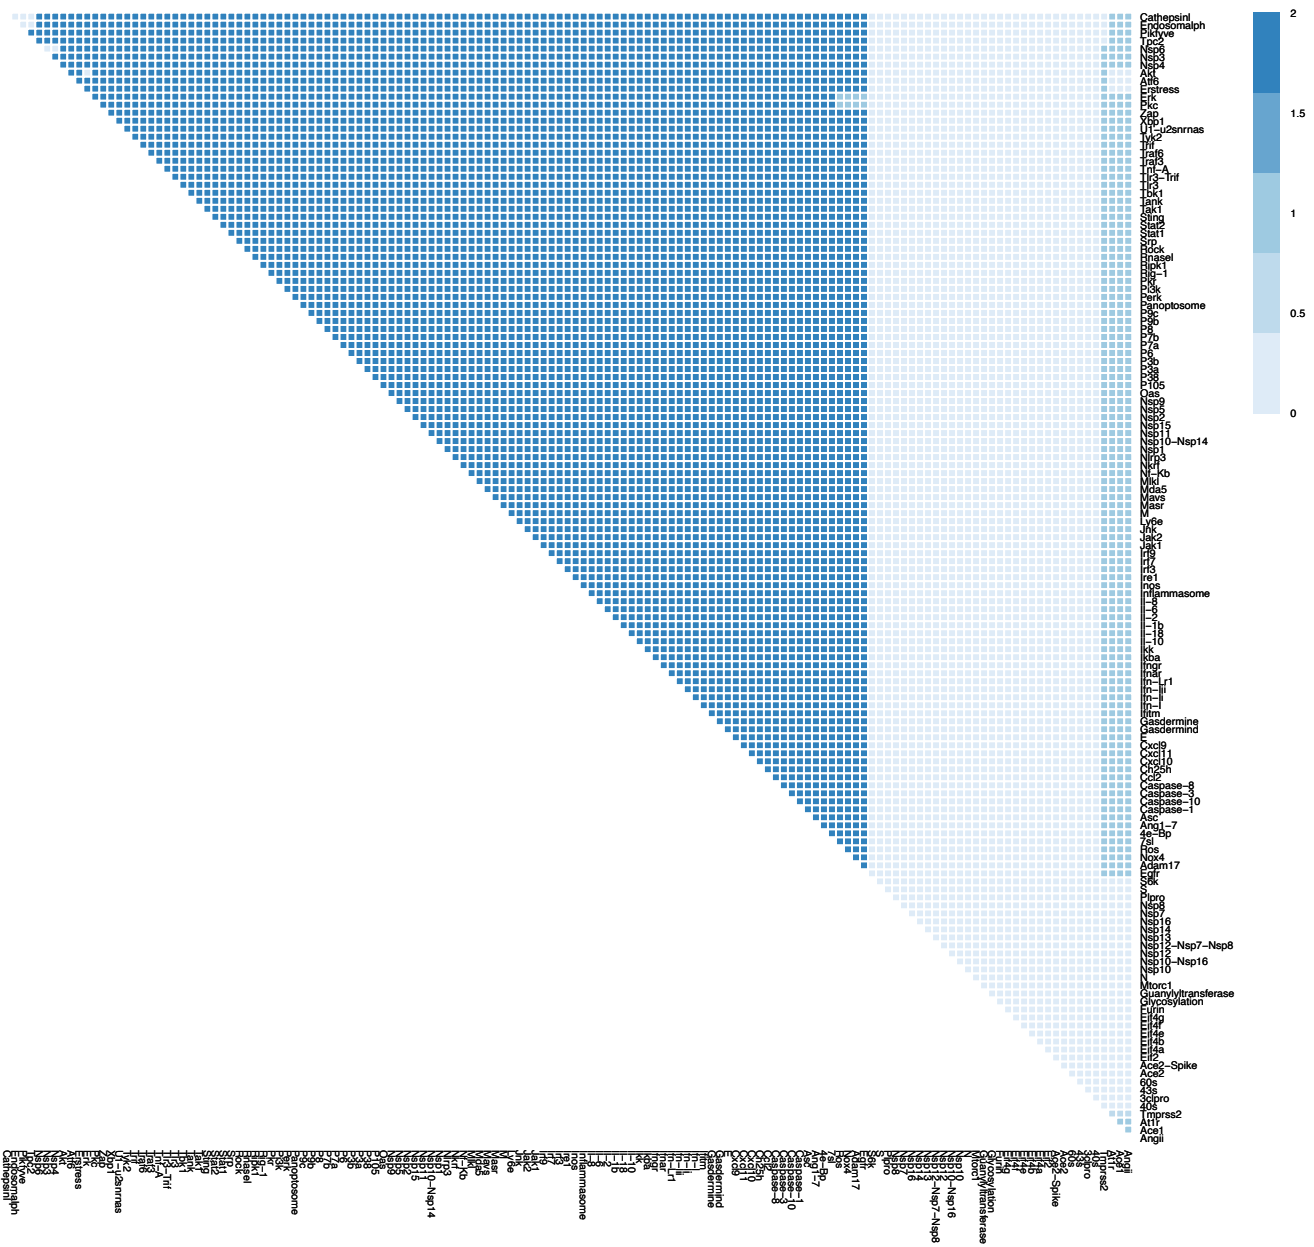

**Supplementary Figure 10m. Effects of combination therapy (all nodes) on Syncytia Formation in early stage, severe COVID-19.** The colour of the square corresponds to the level of the *SyncytiaFormation* node at steady state upon inhibition of the nodes indicated on the x- and y-axis. This plot shows inhibition of all nodes representing druggable targets (proteins and complexes).

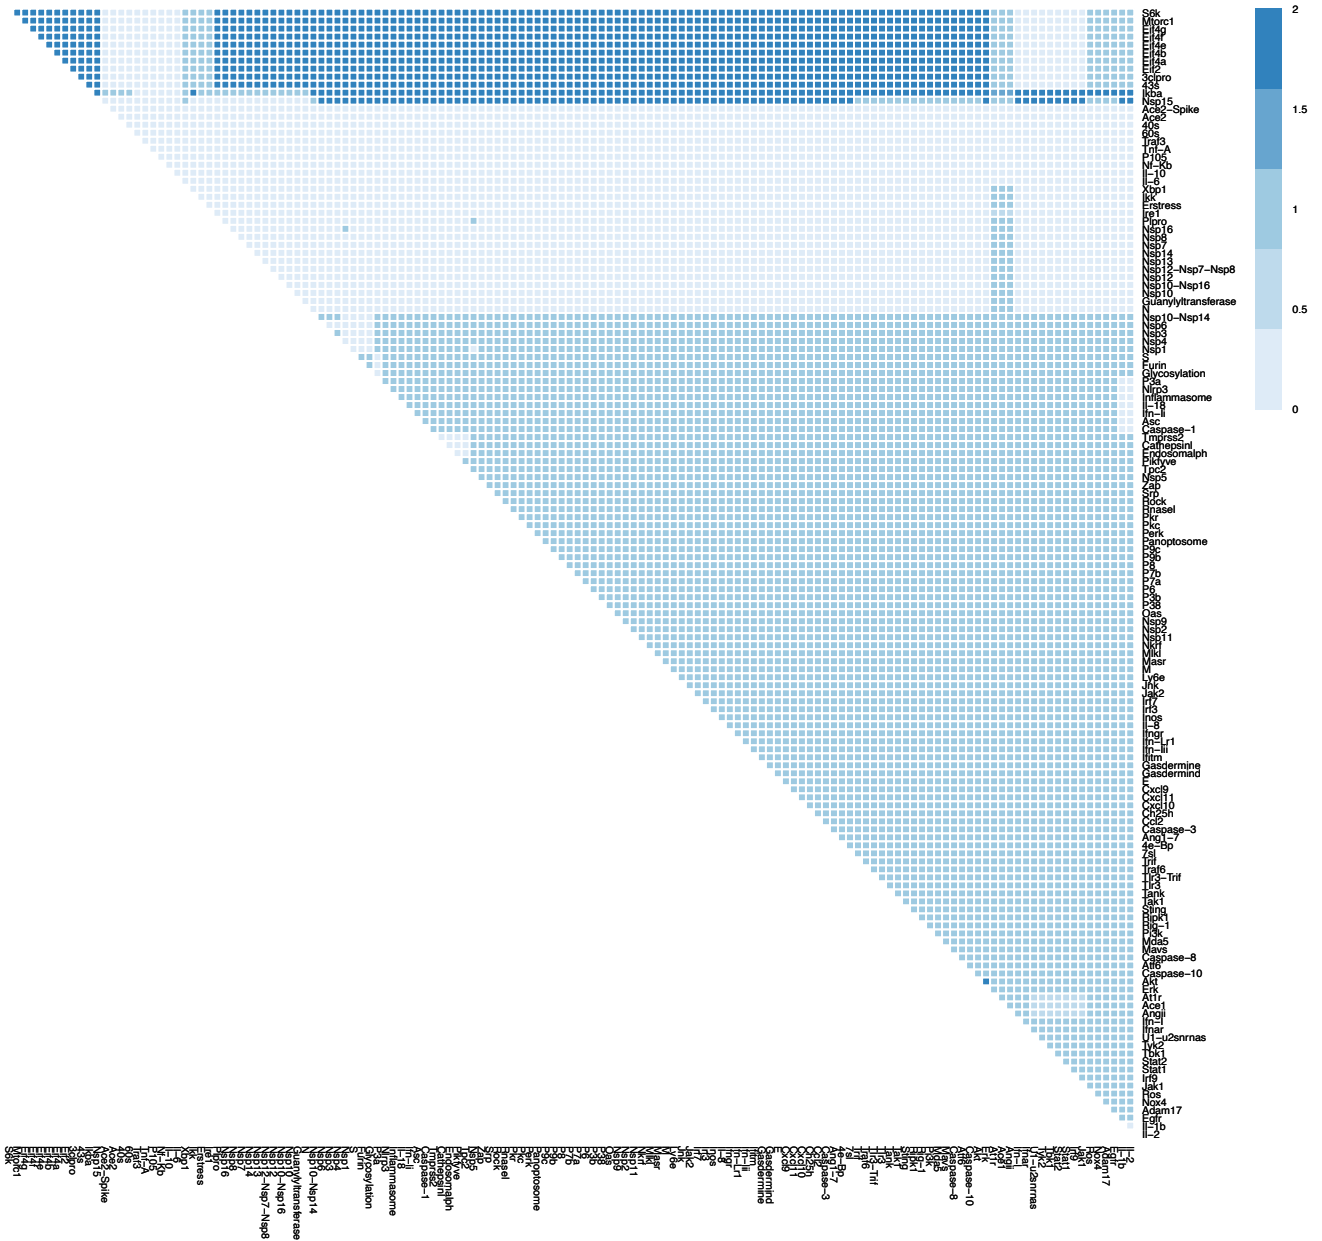

**Supplementary Figure 10n. Effects of combination therapy (all nodes) on T-cell Infiltration in early stage, severe COVID-19.** The colour of the square corresponds to the level of the *T-cellInfiltration* node at steady state upon inhibition of the nodes targets indicated on the x- and y-axis. This plot shows inhibition of all nodes representing druggable targets (proteins and complexes).



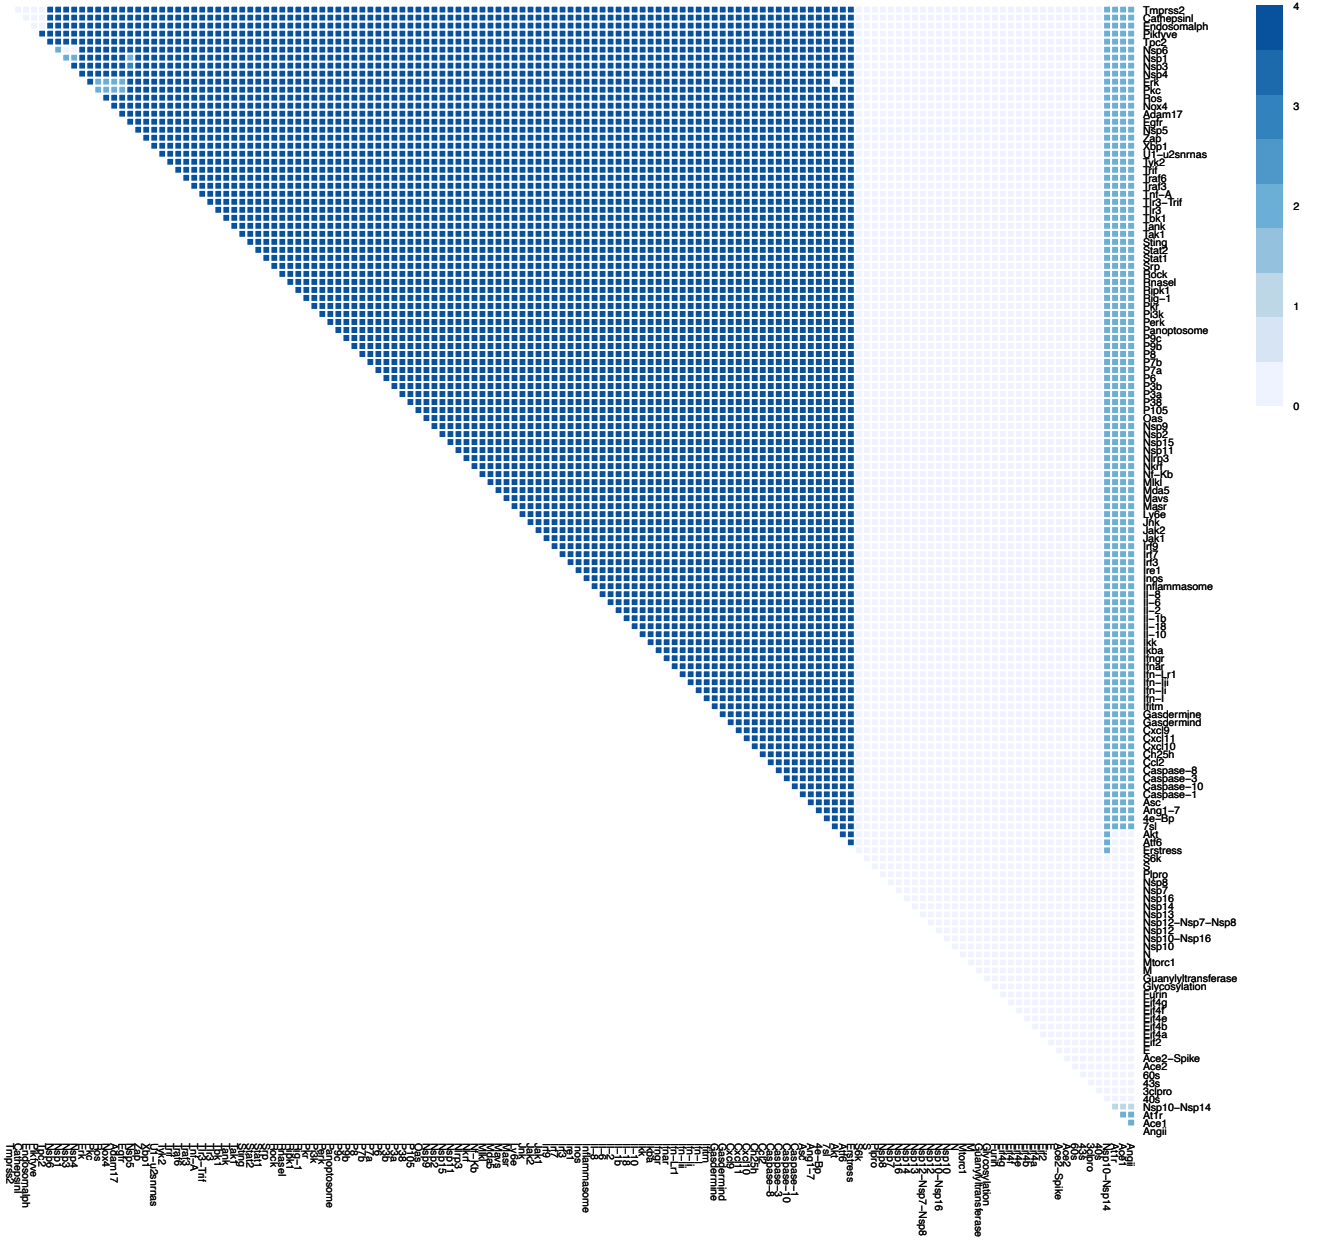

**Supplementary Figure 10p. Effects of combination therapy (all nodes) on Viral Replication in early stage, severe COVID-19.** The colour of the square corresponds to the level of the *ViralReplication* node at steady state upon inhibition of the nodes indicated on the x- and y-axis. This plot shows inhibition of all nodes representing druggable targets (proteins and complexes).

**a**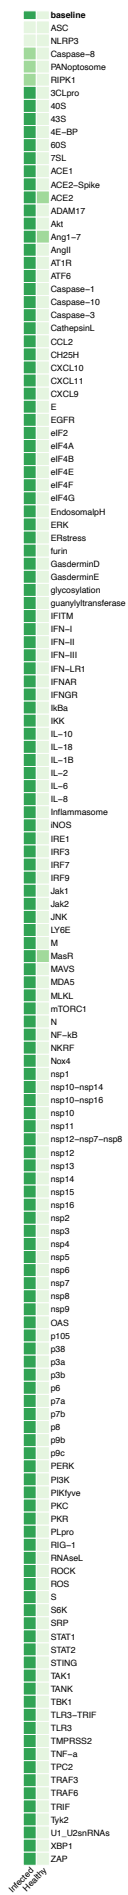**b**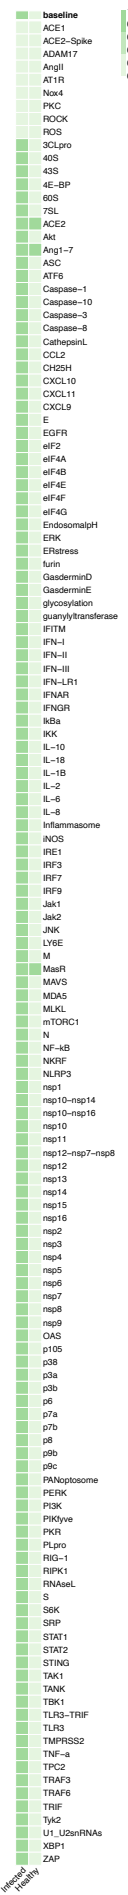**c**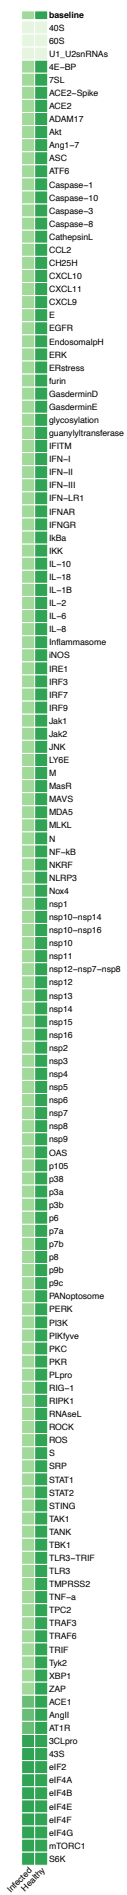**d**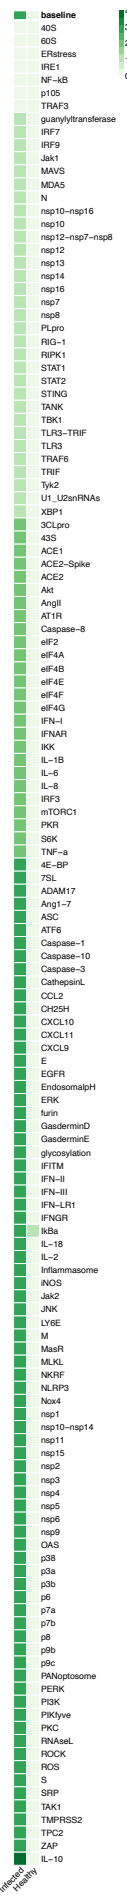

**Supplementary Figure 11 a-d. Effects of single therapies (all nodes) in late stage, severe COVID-19.** Columns represent infected and healthy conditions, rows represent node inhibited. Showing the effect on: (a) Cell Death. (b) Fibrosis. (c) Host Protein Synthesis. (d) Inflammation.



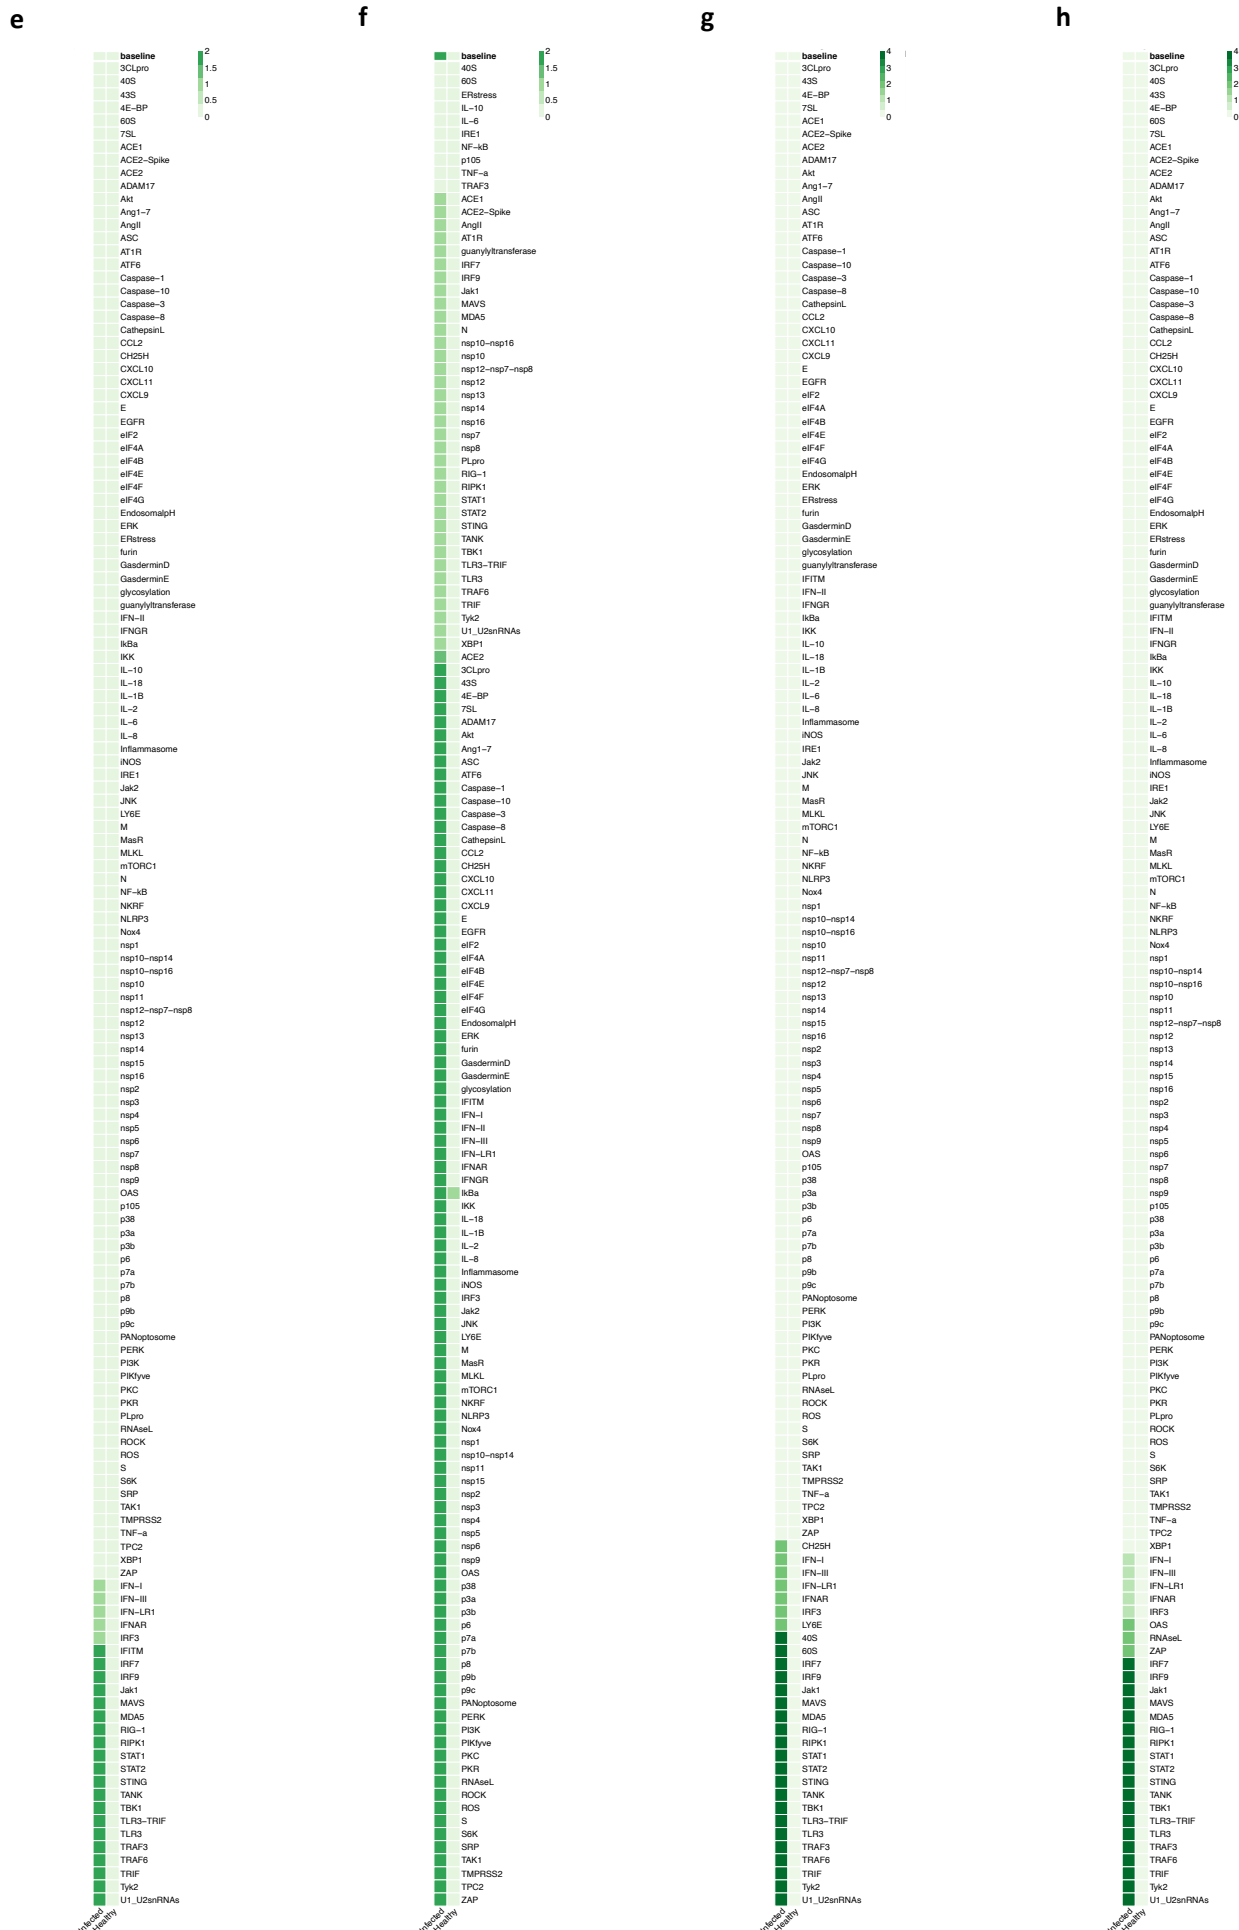

**Supplementary Figure 11 e-h. Effects of single therapies (all nodes) in late stage, severe COVID-19.** Columns represent infected and healthy conditions, rows represent node inhibited. Showing the effect on: **(e)** Syncytia Formation. **(f)** T-cell Infiltration. **(g)** Viral Entry. **(h)** Viral Replication.

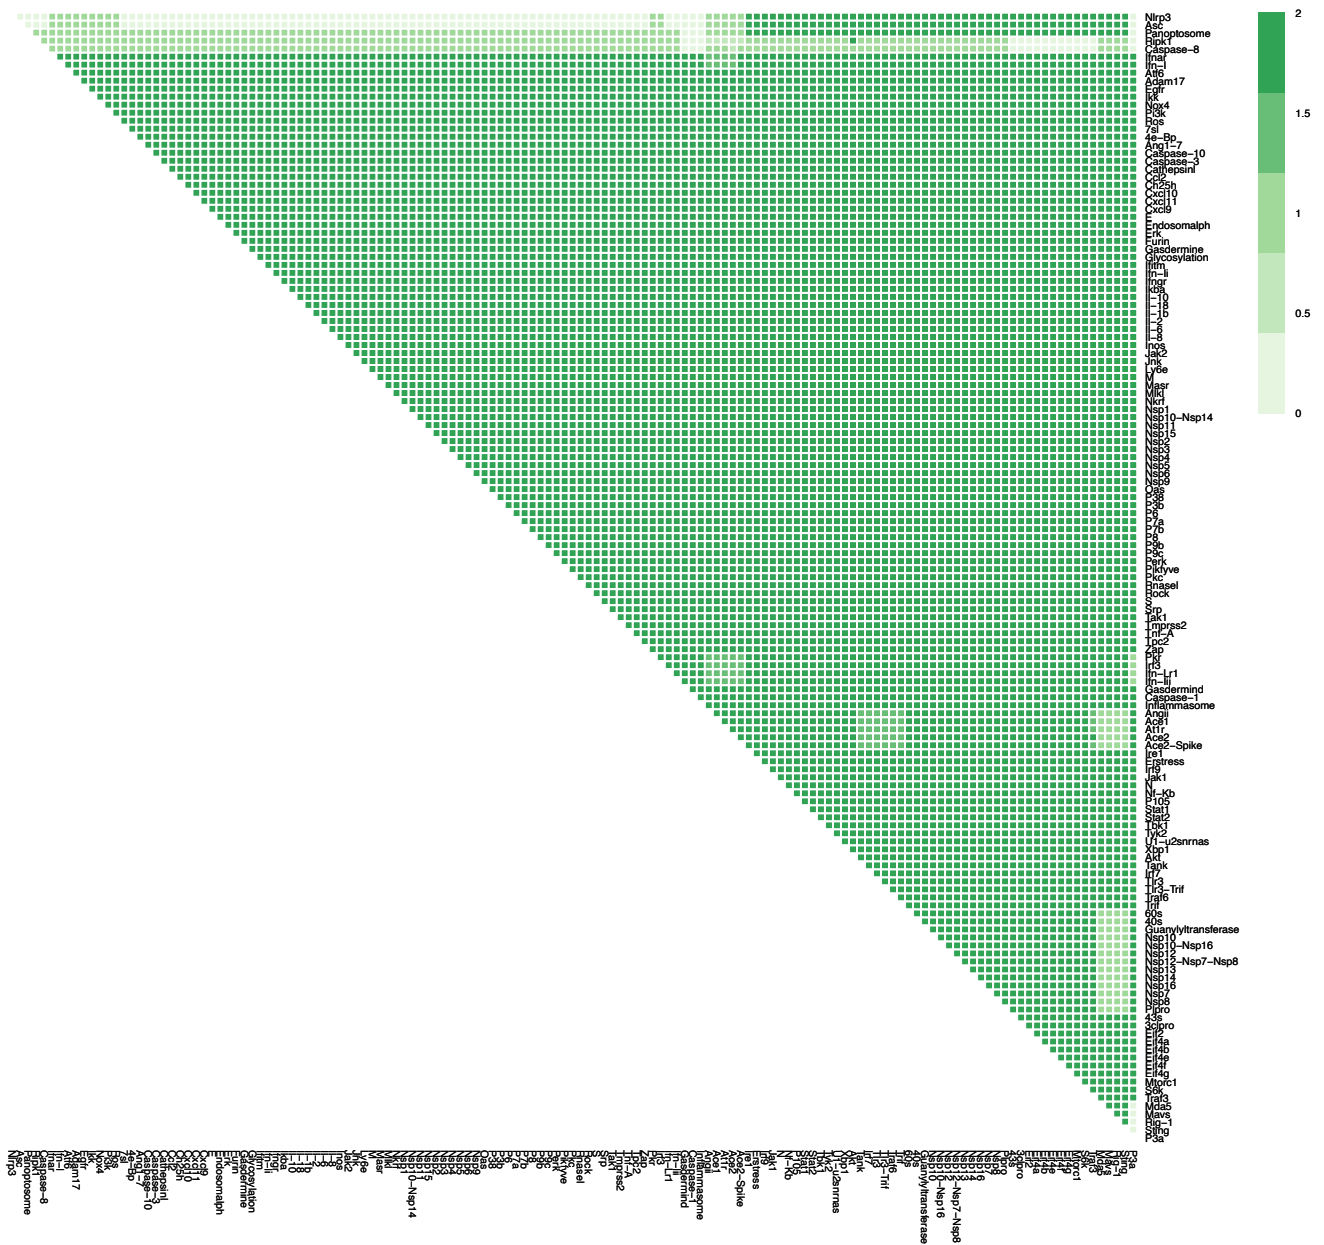

**Supplementary Figure 11i. Effects of combination therapy (all nodes) on Cell Death in late stage, severe COVID-19.** The colour of the square corresponds to the level of the *CellDeath* node at steady state upon inhibition of the nodes indicated on the x- and y-axis. This plot shows inhibition of all nodes representing druggable targets (proteins and complexes).



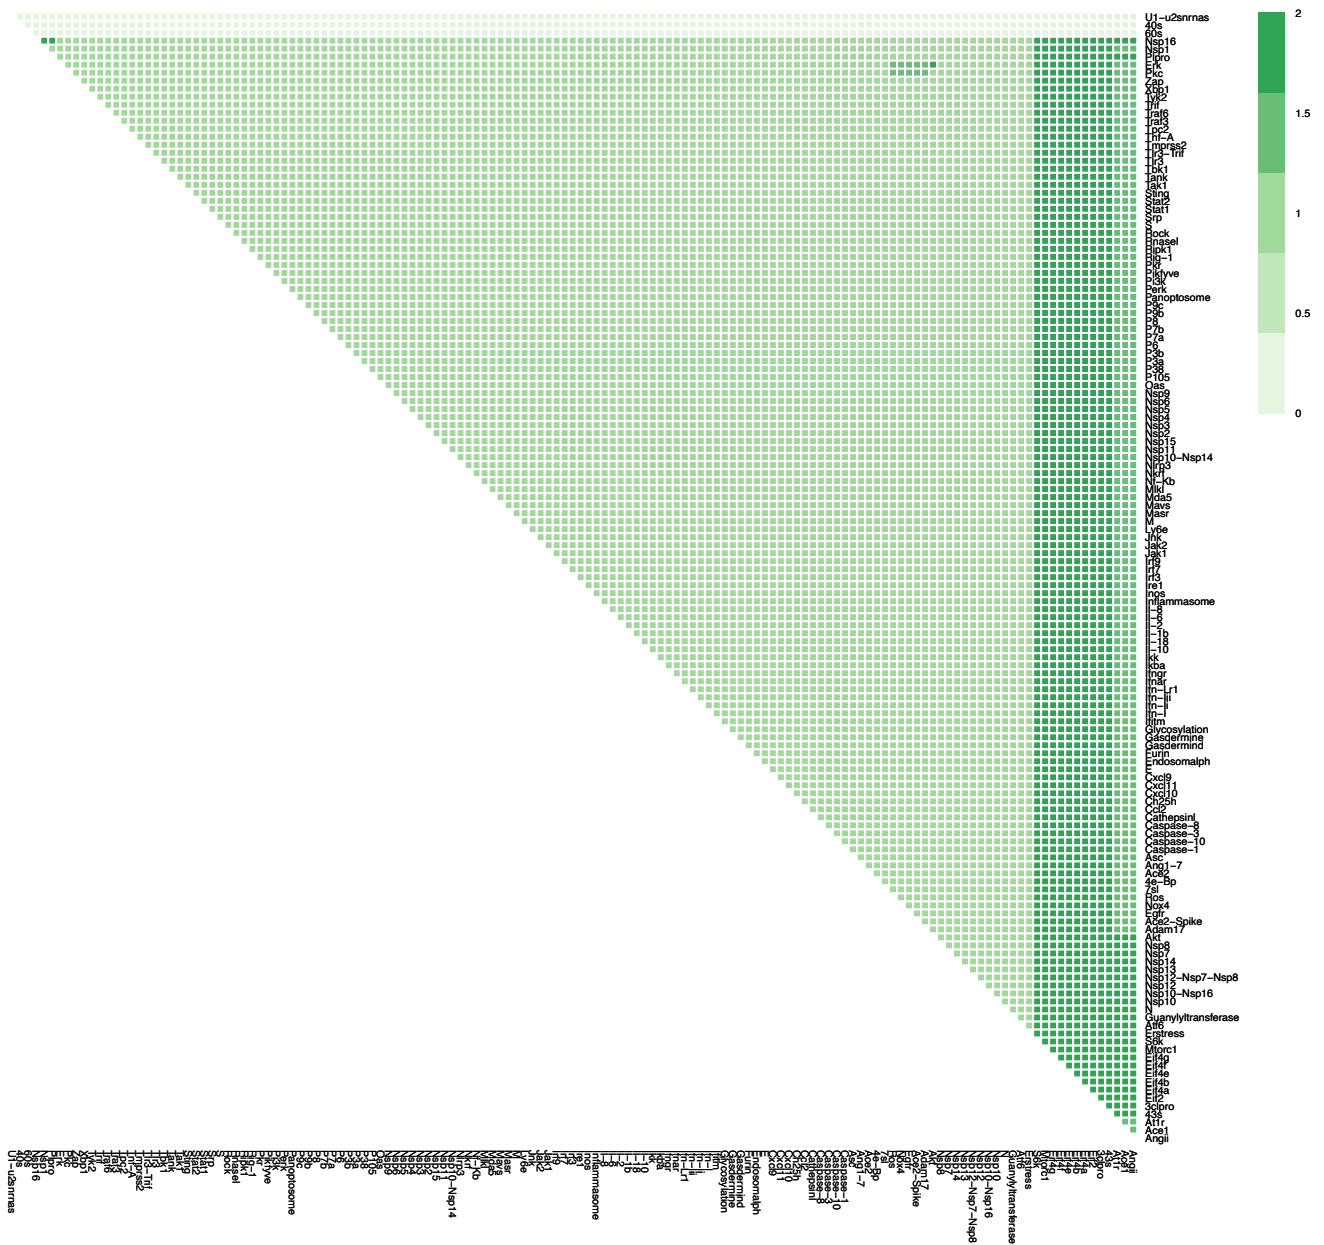

**Supplementary Figure 11k. Effects of combination therapy (all nodes) on Host Protein Synthesis in late stage, severe COVID-19.** The colour of the square corresponds to the level of the *HostProteinSynthesis* node at steady state upon inhibition of the nodes indicated on the x- and y-axis. This plot shows inhibition of all nodes representing druggable targets (proteins and complexes).

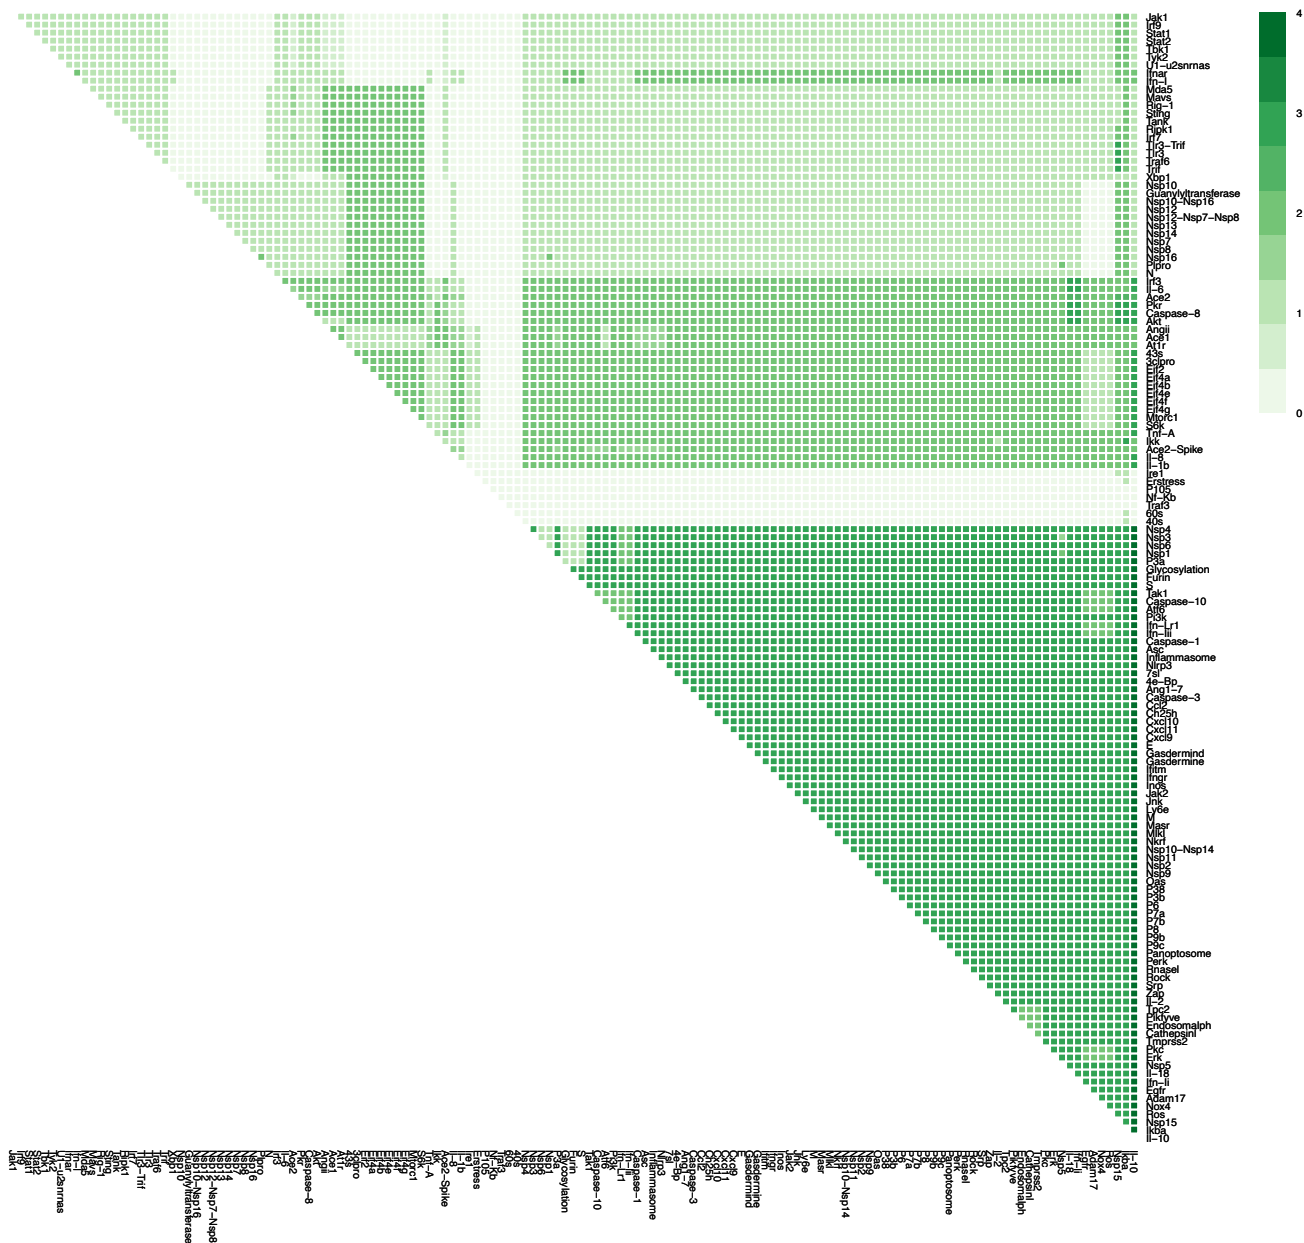

**Supplementary Figure 11I. Effects of combination therapy (all nodes) on Inflammation in late stage, severe COVID-19.** The colour of the square corresponds to the level of the *Inflammation* node at steady state upon inhibition of the nodes indicated on the x- and y-axis. This plot shows inhibition of all nodes representing druggable targets (proteins and complexes).

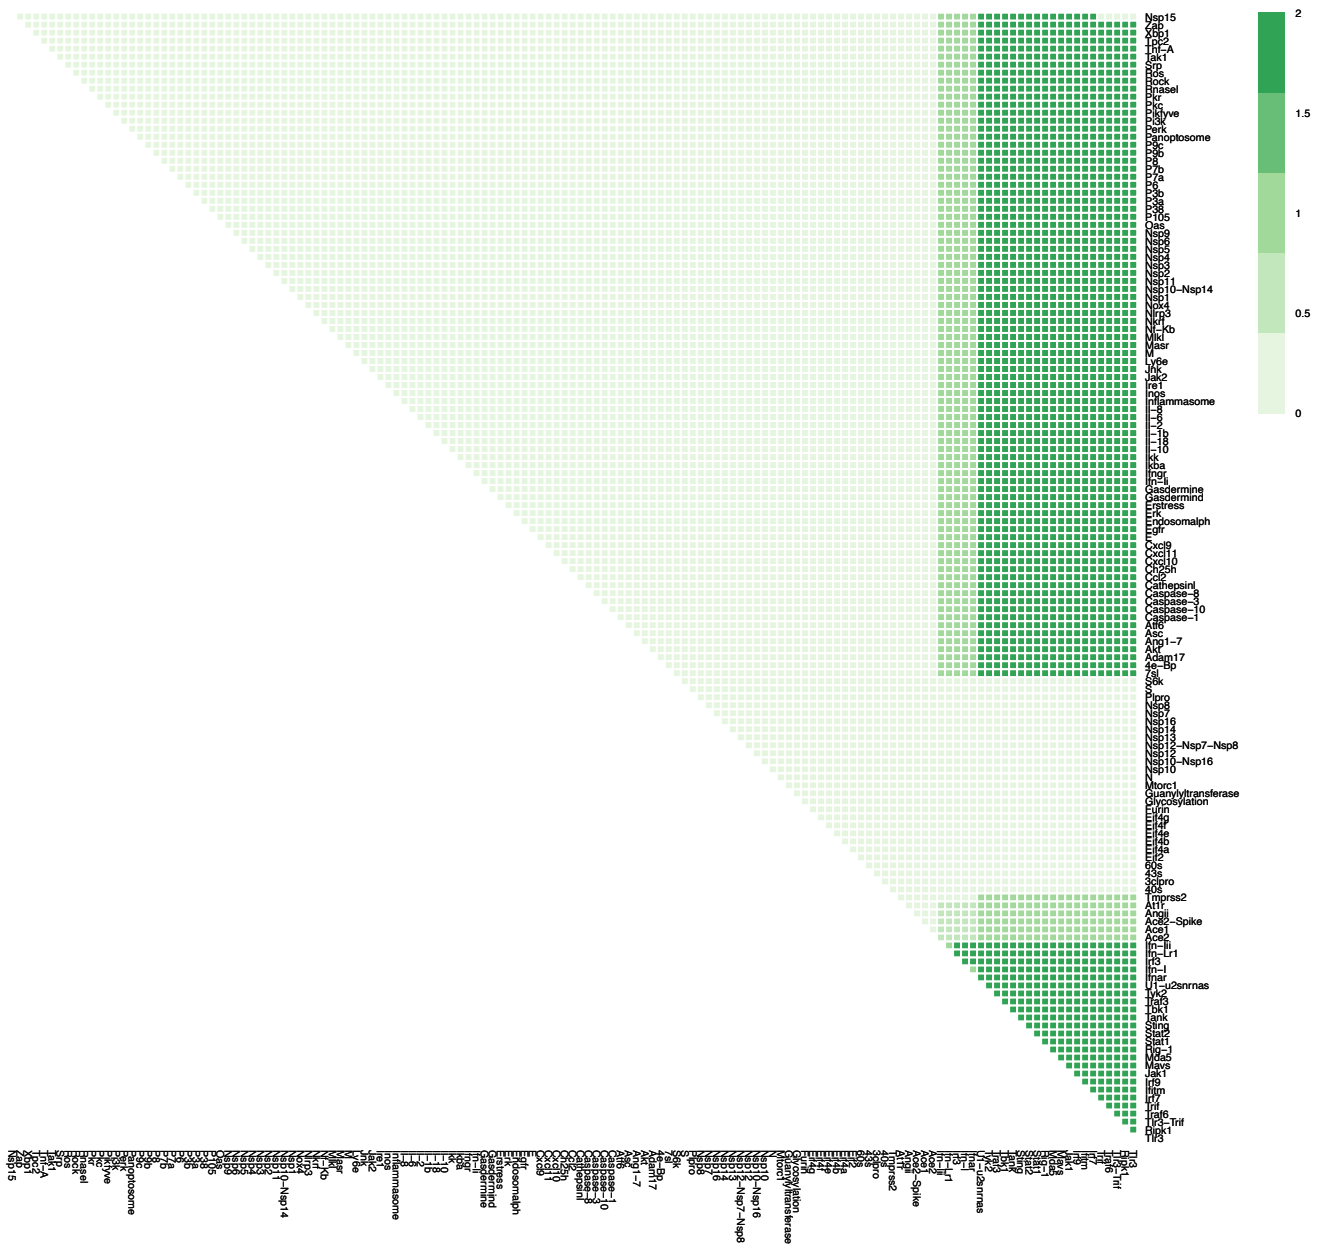

**Supplementary Figure 11m. Effects of combination therapy (all nodes) on Syncytia Formation in late stage, severe COVID-19.** The colour of the square corresponds to the level of the *Syncytia-Formation* node at steady state upon inhibition of the nodes indicated on the x- and y-axis. This plot shows inhibition of all nodes representing druggable targets (proteins and complexes).

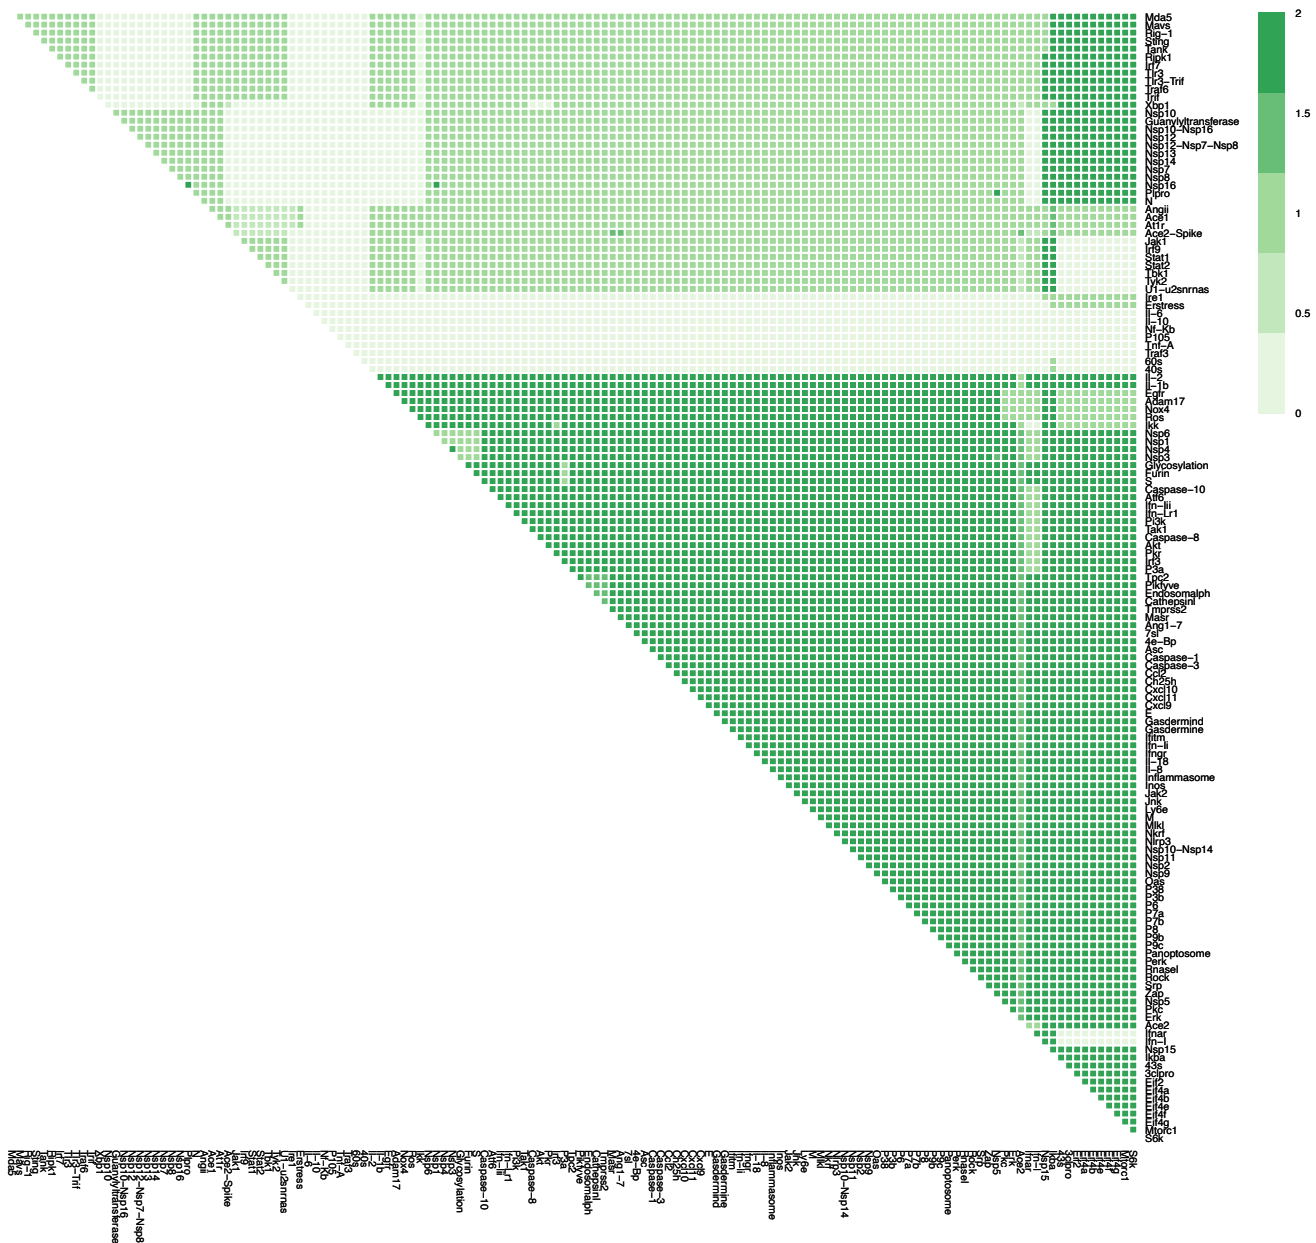

**Supplementary Figure 11n. Effects of combination therapy (all nodes) on T-cell Infiltration in late stage, severe COVID-19.** The colour of the square corresponds to the level of the *T-cellInfiltration* node at steady state upon inhibition of the nodes indicated on the x- and y-axis. This plot shows inhibition of all nodes representing druggable targets (proteins and complexes).

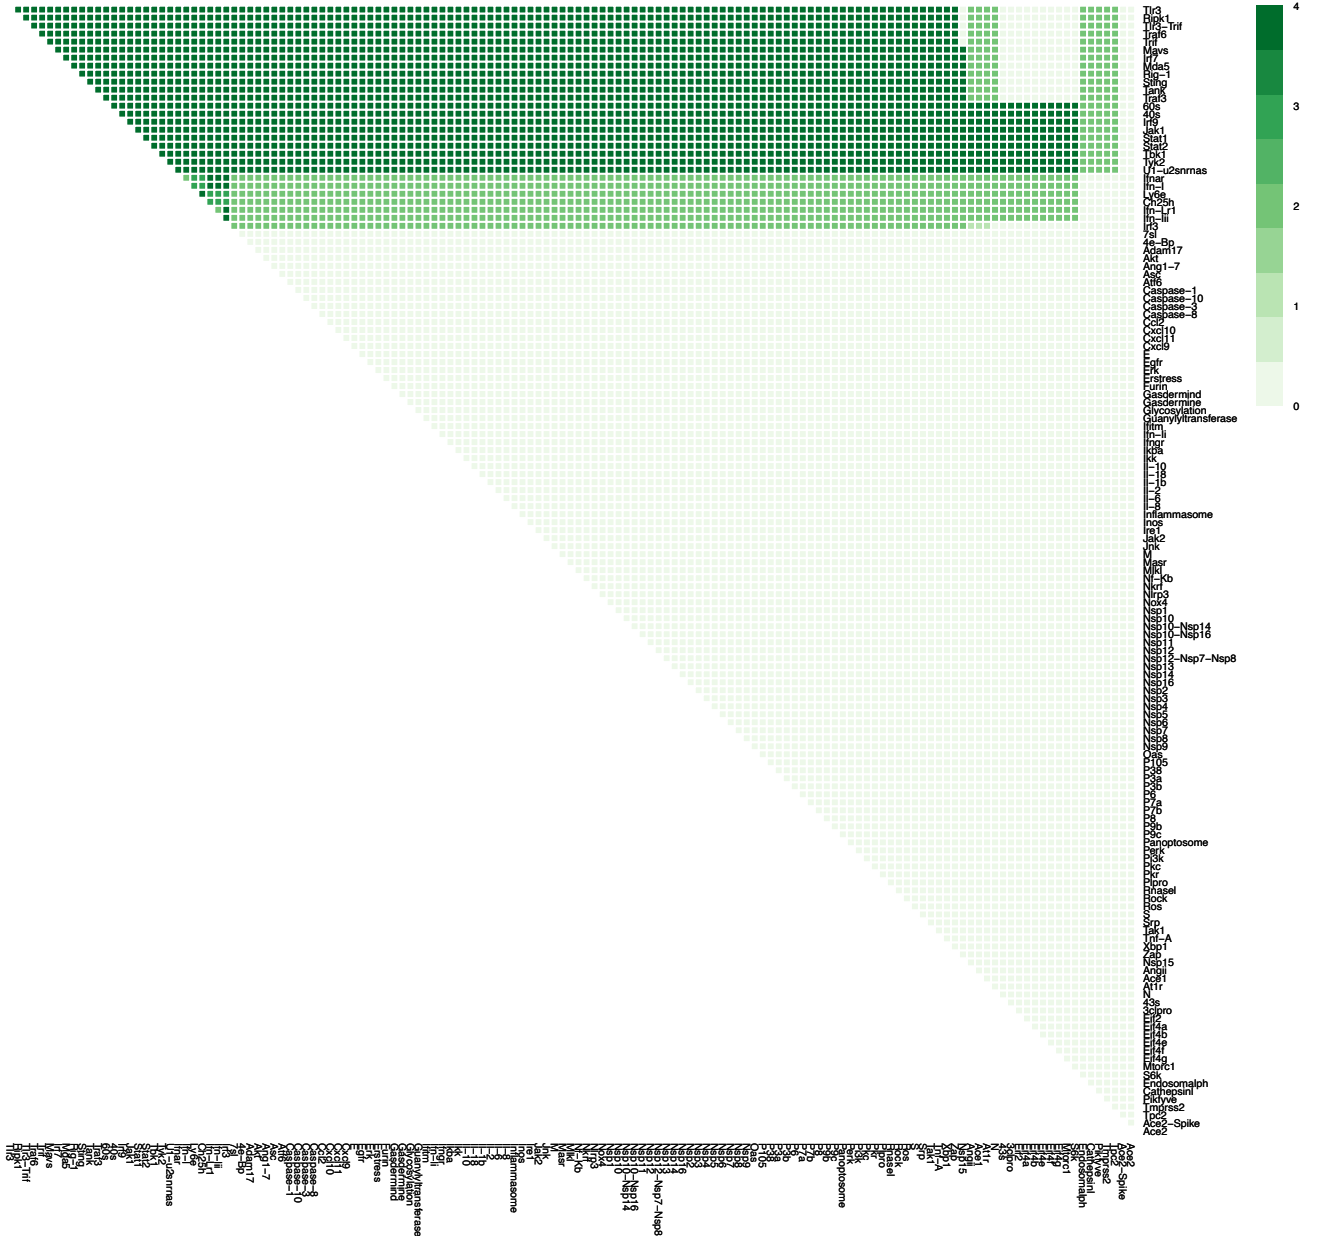

**Supplementary Figure 11o. Effects of combination therapy (all nodes) on Viral Entry in late stage, severe COVID-19.** The colour of the square corresponds to the level of the *ViralEntry* node at steady state upon inhibition of the nodes indicated on the x- and y-axis. This plot shows inhibition of all nodes representing druggable targets (proteins and complexes).



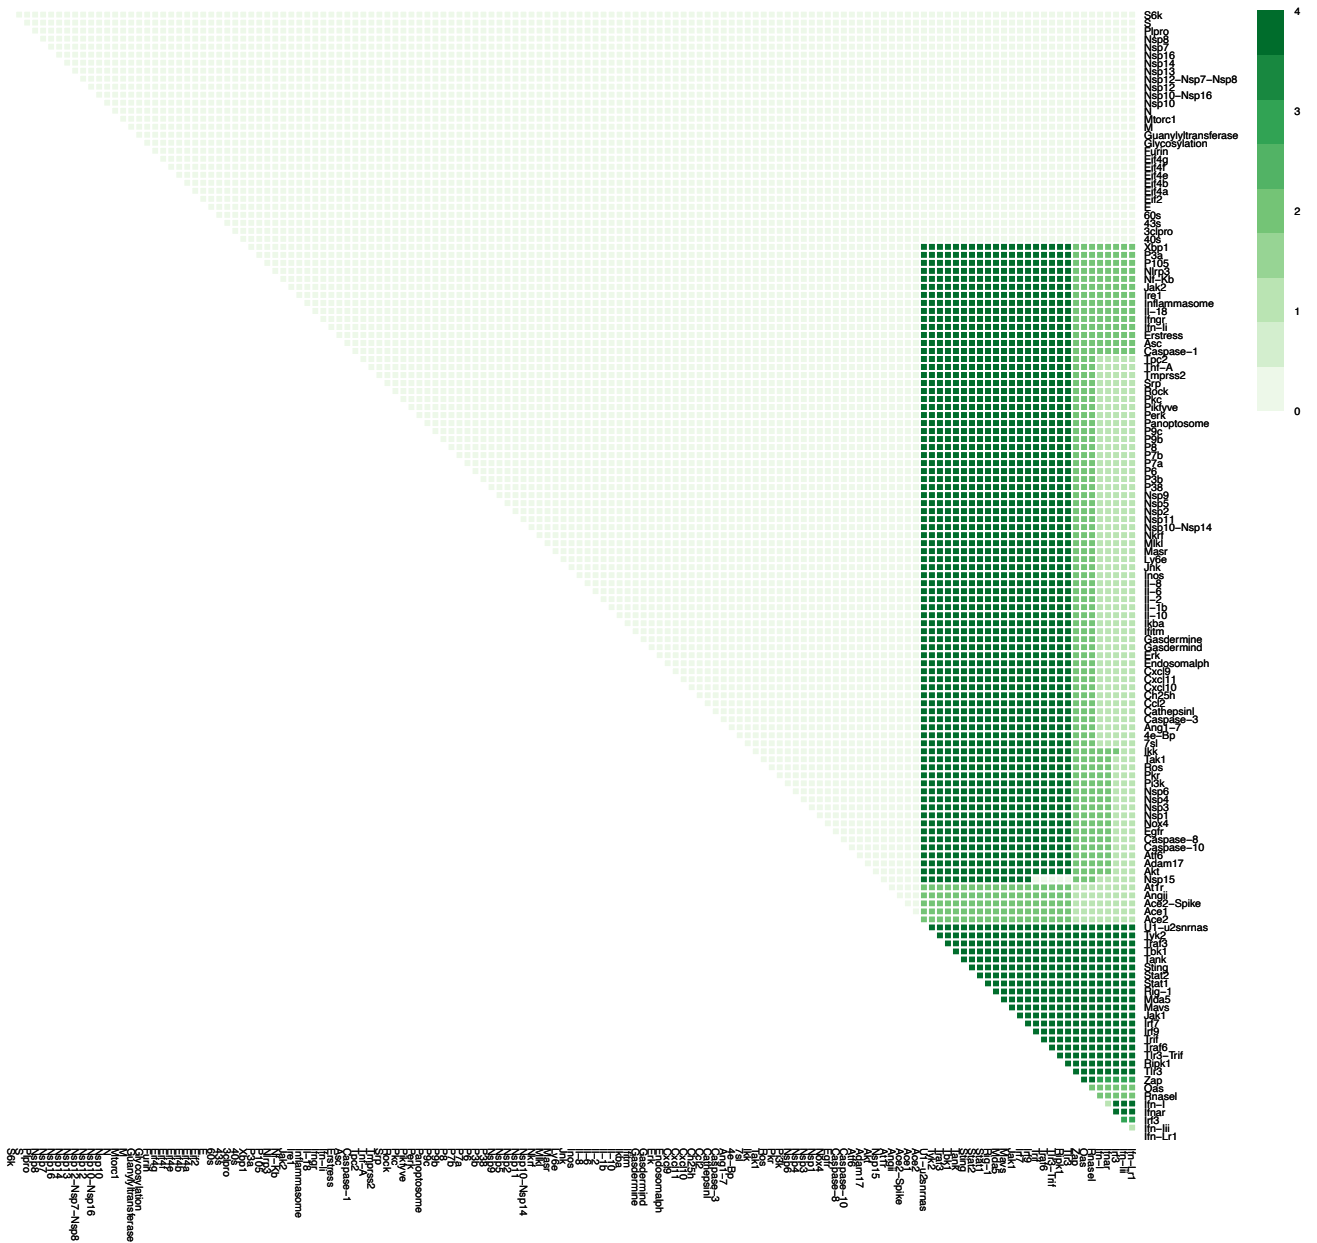

**Supplementary Figure 11p. Effects of combination therapy (all nodes) on Viral Replication in late stage, severe COVID-19.** The colour of the square corresponds to the level of the *ViralReplication* node at steady state upon inhibition of the nodes indicated on the x- and y-axis. This plot shows inhibition of all nodes representing druggable targets (proteins and complexes).

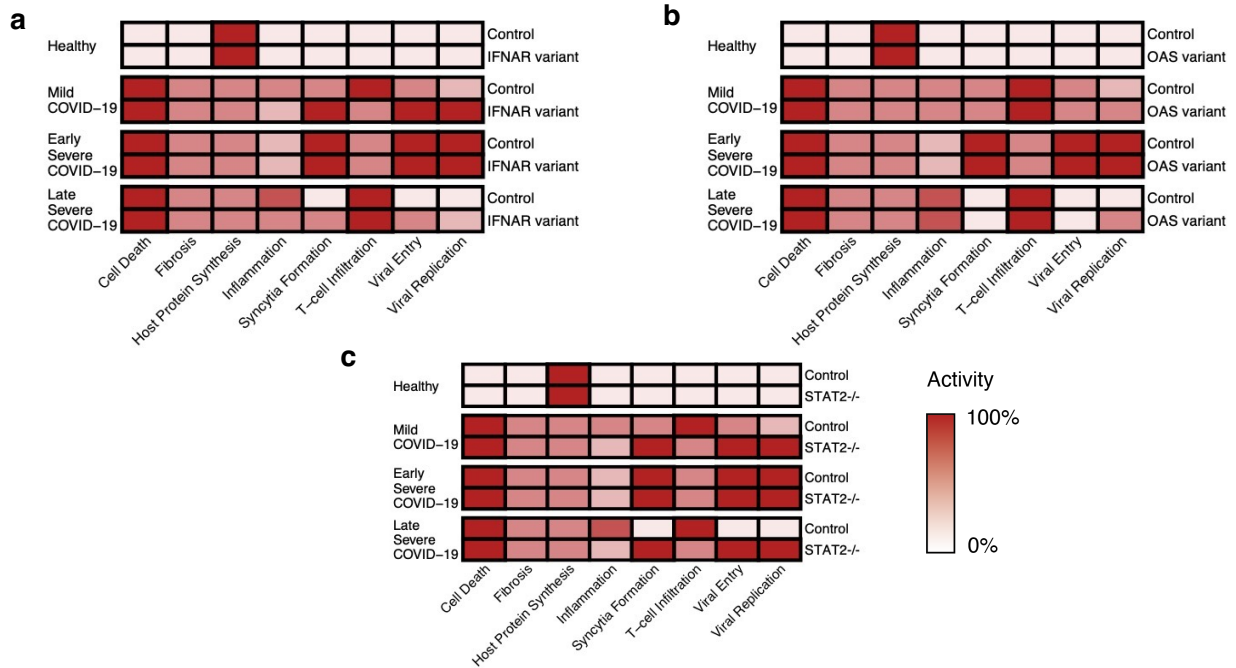

**Supplementary Figure 12. Genetic risk factors associated with severe COVID-19.** The behaviour of a loss-of-function mutation in IFNAR (a), OAS (b) and STAT2 (c) under the four conditions simulated by the model. All nodes normalized to be between 0 and 100%.

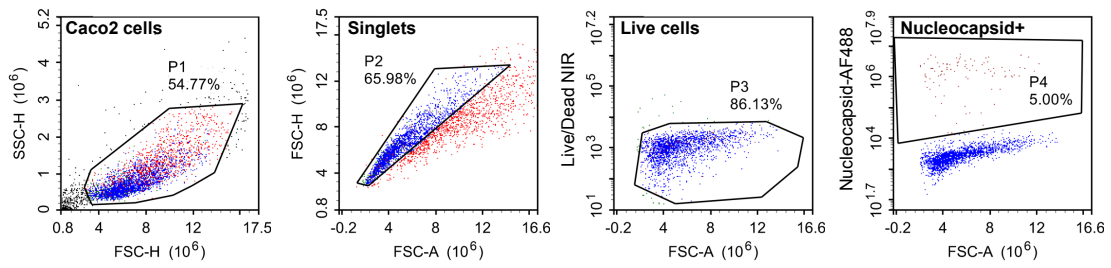

**Supplementary Figure 13: Gating strategy used to identify expression of N protein and viability in Caco-2 cells.** This gating strategy was utilised in Figure 6 and Supplementary Figures 6 and 7.

**Supplementary Table 1. Regulatory edges in the network model**

| From                         | To                            | Type      | Explanation                                                                                                                 | Reference                                                            |
|------------------------------|-------------------------------|-----------|-----------------------------------------------------------------------------------------------------------------------------|----------------------------------------------------------------------|
| 3CLpro                       | nsp1_nsp2_nsp3_nsp4           | Activator | 3CLpro cleaves pp1a and pp1ab into nsp1-4 and all nsps 5 to 10                                                              | Fehr, A. et al. (2015)                                               |
| 3CLpro                       | nsp10                         | Activator | 3CLpro cleaves pp1a and pp1ab into nsp1-4 and all nsps 5 to 10                                                              | Fehr, A. et al. (2015)                                               |
| 3CLpro                       | nsp11                         | Activator | 3CLpro cleaves pp1a and pp1ab into nsp1-4 and all nsps 5 to 10                                                              | Fehr, A. et al. (2015)                                               |
| 3CLpro                       | nsp12                         | Activator | 3CLpro cleaves pp1a and pp1ab into nsp1-4 and all nsps 5 to 10                                                              | Fehr, A. et al. (2015)                                               |
| 3CLpro                       | nsp13                         | Activator | 3CLpro cleaves pp1a and pp1ab into nsp1-4 and all nsps 5 to 10                                                              | Fehr, A. et al. (2015)                                               |
| 3CLpro                       | nsp14                         | Activator | 3CLpro cleaves pp1a and pp1ab into nsp1-4 and all nsps 5 to 10                                                              | Fehr, A. et al. (2015)                                               |
| 3CLpro                       | nsp15                         | Activator | 3CLpro cleaves pp1a and pp1ab into nsp1-4 and all nsps 5 to 10                                                              | Fehr, A. et al. (2015)                                               |
| 3CLpro                       | nsp16                         | Activator | 3CLpro cleaves pp1a and pp1ab into nsp1-4 and all nsps 5 to 10                                                              | Fehr, A. et al. (2015)                                               |
| 3CLpro                       | nsp5                          | Activator | 3CLpro cleaves pp1a and pp1ab into nsp1-4 and all nsps 5 to 10                                                              | Fehr, A. et al. (2015)                                               |
| 3CLpro                       | nsp6                          | Activator | 3CLpro cleaves pp1a and pp1ab into nsp1-4 and all nsps 5 to 10                                                              | Fehr, A. et al. (2015)                                               |
| 3CLpro                       | nsp7                          | Activator | 3CLpro cleaves pp1a and pp1ab into nsp1-4 and all nsps 5 to 10                                                              | Fehr, A. et al. (2015)                                               |
| 3CLpro                       | nsp8                          | Activator | 3CLpro cleaves pp1a and pp1ab into nsp1-4 and all nsps 5 to 10                                                              | Fehr, A. et al. (2015)                                               |
| 3CLpro                       | nsp9                          | Activator | 3CLpro cleaves pp1a and pp1ab into nsp1-4 and all nsps 5 to 10                                                              | Fehr, A. et al. (2015)                                               |
| 40S                          | 43S                           | Activator | 43S ribosomal subunit assembled from 40S subunit and multiple eIFs, including eIF2-GTP                                      | Sonenberg, N. et al. (2009)                                          |
| 40S                          | Cap-independentTranslation    | Activator | 40S subunit binds mRNA directly in cap-independent translation                                                              | Walters, B. et al. (2016)                                            |
| 43S                          | HostCap-dependentTranslation  | Activator | 43S subunit required for cap-dependent translation                                                                          | Sonenberg, N. et al. (2009)                                          |
| 43S                          | ViralCap-dependentTranslation | Activator | 43S subunit required for cap-dependent translation                                                                          | Sonenberg, N. et al. (2009)                                          |
| 4E-BP                        | eIF4E                         | Inhibitor | 4E-BP binds eIF4E, preventing it from associating with eIF4F                                                                | Sonenberg, N. et al. (2009)                                          |
| 60S                          | Cap-independentTranslation    | Activator | 60S required for protein synthesis cap-independent translation                                                              | Walters, B. et al. (2016)                                            |
| 60S                          | HostCap-dependentTranslation  | Activator | 60S subunit required for cap-dependent translation                                                                          | Sonenberg, N. et al. (2009)                                          |
| 60S                          | ViralCap-dependentTranslation | Activator | 60S subunit required for cap-dependent translation                                                                          | Sonenberg, N. et al. (2009)                                          |
| 7SL                          | SRP                           | Activator | 7SL RNA binds to SRP                                                                                                        | Akopian, D. et al. (2013)                                            |
| ACE1                         | AngII                         | Activator | ACE1 produces AngII                                                                                                         | Alexandre, J. et al. (2020)                                          |
| ACE2                         | ACE2-Spike                    | Activator | The virus enters the cell through interaction of the spike protein with ACE2                                                | Zhou, P. (2020); Shang, J. et al. (2020)                             |
| ACE2                         | Ang1-7                        | Activator | ACE2 converts AngII to Ang1-7                                                                                               | Alexandre, J. et al. (2020)                                          |
| ACE2-Spike                   | Ang1-7                        | Inhibitor | Interaction with spike causes shedding of ACE2 and may compete for binding of substrates, preventing conversion into Ang1-7 | Ingraham, N. (2020); Wang, S. et al. (2008); Haga, S. (2008)         |
| ACE2-Spike                   | ViralFusion                   | Activator | Interaction of the Spike with ACE2 allows entry of the viral genome                                                         | Hoffmann, M. (2020); Lan, J. (2020); Ou, X. (2020)                   |
| ADAM17                       | ACE2                          | Inhibitor | ADAM17 contributes to ACE2 shedding                                                                                         | Ingraham, N. (2020); Haga, S. (2008)                                 |
| ADAM17                       | EGFR                          | Activator | ADAM17 required for EGFR transactivation, cleaves HB-EGF                                                                    | Forrester, S. (2018)                                                 |
| Akt                          | Caspase-3                     | Inhibitor | Akt phosphorylates BAD and caspase-9, inhibiting apoptosis                                                                  | Song, G. et al. (2005)                                               |
| Akt                          | IKK                           | Activator | Akt promotes NF-κB activity through IKK                                                                                     | Song, G. et al. (2005)                                               |
| Akt                          | mTORC1                        | Activator |                                                                                                                             | Magnuson, B. et al. (2012)                                           |
| Ang1-7                       | MasR                          | Activator | Ang1-7 binds to the MasR receptor                                                                                           | Alexandre, J. et al. (2020)                                          |
| AngII                        | Ang1-7                        | Activator | ACE2 converts AngII to Ang1-7                                                                                               | Alexandre, J. et al. (2020)                                          |
| AngII                        | AT1R                          | Activator | AngII binds to the AT1R receptor                                                                                            | Alexandre, J. et al. (2020)                                          |
| Apoptosis                    | CellDeath                     | Activator | Cell death may occur via apoptosis, necroptosis or pyroptosis                                                               |                                                                      |
| ASC                          | Inflammasome                  | Activator | ASC, NLRP3 and pro-caspase-1 form inflammasome leading to activation of Caspase-1                                           | Lee, S. et al. (2020)                                                |
| ASC                          | PANoptosome                   | Activator | PANoptosome formed from Caspase-8, NLRP3, ASC, RIPK1 as well as RIPK3 and FADD                                              | Christgen, S. et al. (2020)                                          |
| AT1R                         | Nox4                          | Activator | AngII stimulates Nox activity through AT1R                                                                                  | Forrester, S. (2018)                                                 |
| AT1R                         | p38                           | Activator | AT1R activity induces p38 activity                                                                                          | Forrester, S. (2018)                                                 |
| AT1R                         | PKC                           | Activator | PKCdelta activity is induced by active AT1R                                                                                 | Forrester, S. (2018)                                                 |
| ATF6                         | Akt                           | Activator | ATF6 activity causes Akt phosphorylation                                                                                    | Pathinayake, P. et al. (2018)                                        |
| Cap-independentTranslation   | HostProteinSynthesis          | Activator | Host proteins can be produced by both cap-dependent and -independent mechanisms (less efficient and not all proteins)       | Walters, B. et al. (2016)                                            |
| Caspase-1                    | GasderminD                    | Activator | Caspase-1 drives pyroptosis through cleavage of Gasdermin D                                                                 | Man, S. et al. (2017)                                                |
| Caspase-1                    | IL-18                         | Activator | Caspase-1 cleaves pro-IL-18                                                                                                 | Man, S. et al. (2017)                                                |
| Caspase-1                    | IL-1B                         | Activator | Caspase-1 cleaves pro-IL-1B                                                                                                 | Man, S. et al. (2017)                                                |
| Caspase-10                   | IKK                           | Activator | Cytosolic PRRs can induce NF-κB through caspase8/10 using RIP1                                                              | Mogensen, T. (2009)                                                  |
| Caspase-3                    | Apoptosis                     | Activator | Caspase-3 drives apoptosis                                                                                                  | Lee, S. et al. (2020)                                                |
| Caspase-8                    | Caspase-3                     | Activator | Caspase-8 cleaves pro-caspase-3 to initiate cell death                                                                      | Lee, S. et al. (2020)                                                |
| Caspase-8                    | IKK                           | Activator | Cytosolic PRRs can induce NF-κB through caspase8/10 using RIP1                                                              | Mogensen, T. (2009)                                                  |
| Caspase-8                    | PANoptosome                   | Activator | PANoptosome formed from Caspase-8, NLRP3, ASC, RIPK1 as well as RIPK3 and FADD                                              | Christgen, S. et al. (2020)                                          |
| CathepsinL                   | ViralFusion                   | Activator | Fusion of viral and cellular membranes requires proteolytic cleavage of the spike.                                          | Fehr, A. et al. (2015); Shang, J. et al. (2020); Hoffmann, M. (2020) |
| CH25H                        | ViralEntry                    | Inhibitor | ISG CH25H interferes with S protein membrane fusion by production of CH25 lipid                                             | Zang, R. et al. (2020)                                               |
| CH25H                        | ViralEntry10                  | Inhibitor | ISG CH25H interferes with S protein membrane fusion by production of CH25 lipid                                             | Zang, R. et al. (2020)                                               |
| CytosolicPRRs                | Caspase-10                    | Activator | Cytosolic PRRs can induce NF-κB through caspase8/10 using RIP1                                                              | Mogensen, T. (2009)                                                  |
| CytosolicPRRs                | Caspase-8                     | Activator | Cytosolic PRRs can induce NF-κB through caspase8/10 using RIP1                                                              | Mogensen, T. (2009)                                                  |
| CytosolicPRRs                | TBK1                          | Activator | Cytosolic PRRs together with TRAF3 and TANK1 can induce IFN through TBK1                                                    | Mogensen, T. (2009)                                                  |
| DMVformation                 | ViralGenome                   | Activator | RNA replication occurs in DMVs                                                                                              | Snijder, E. (2020)                                                   |
| DMVformation                 | ViralsgRNAs                   | Activator | RNA replication occurs in DMVs                                                                                              | Snijder, E. (2020)                                                   |
| E                            | VirionERGIC                   | Activator | Structural proteins form virion in endoplasmic reticulum-Golgi intermediate compartment (ERGIC)                             | Fehr, A. et al. (2015)                                               |
| EGFR                         | ERK                           | Activator | ERK1/2 activated by AT1R through PKC and EGFR                                                                               | Forrester, S. (2018)                                                 |
| EGFR                         | ERstress                      | Activator | EGFR/ADAM17 transactivation contributes to AngII/AT1R induced ER stress.                                                    | Forrester, S. (2018)                                                 |
| EGFR                         | PI3K                          | Activator | PI3K induced by EGFR/ADAM17 transactivation by AngII/AT1R.                                                                  | Forrester, S. (2018)                                                 |
| eIF2                         | 43S                           | Activator | 43S ribosomal subunit assembled from 40S subunit and multiple eIFs, including eIF2-GTP                                      | Sonenberg, N. et al. (2009)                                          |
| eIF4A                        | eIF4F                         | Activator | eIF4F complex formed of eIF4A, E, G and others                                                                              | Sonenberg, N. et al. (2009)                                          |
| eIF4B                        | eIF4A                         | Activator | eIF4B activates eIF4A helicase activity                                                                                     | Magnuson, B. et al. (2012)                                           |
| eIF4E                        | eIF4F                         | Activator | eIF4F complex formed of eIF4A, E, G and others                                                                              | Sonenberg, N. et al. (2009)                                          |
| eIF4F                        | HostCap-dependentTranslation  | Activator | eIF4F complex subunit required for cap-dependent translation                                                                | Sonenberg, N. et al. (2009)                                          |
| eIF4F                        | ViralCap-dependentTranslation | Activator | eIF4F complex subunit required for cap-dependent translation                                                                | Sonenberg, N. et al. (2009)                                          |
| eIF4G                        | eIF4F                         | Activator | eIF4F complex formed of eIF4A, E, G and others                                                                              | Sonenberg, N. et al. (2009)                                          |
| EndosomalpH                  | ViralFusion                   | Activator | Low endosomal pH is required for viral fusion                                                                               | Vincent, M. et al. (2005); Wang, M. et al. (2020)                    |
| ERK                          | mTORC1                        | Activator | ERK promotes mTORC1 activation through inhibition of Tsc2, inhibitor of mTORC1                                              | Magnuson, B. et al. (2012)                                           |
| ERstress                     | ATF6                          | Activator | ATF6 cleaved and moves to nucleus in response to ER stress                                                                  | Pathinayake, P. et al. (2018)                                        |
| ERstress                     | IRE1                          | Activator | ER stress causes IRE1 self-activation                                                                                       | Pathinayake, P. et al. (2018)                                        |
| ERstress                     | PERK                          | Activator | AngII/AT1R induces PERK activity through ER stress                                                                          | Forrester, S. (2018)                                                 |
| furin                        | S                             | Activator | furin cleaves S protein to activate                                                                                         | Fehr, A. et al. (2015); Shang, J. et al. (2020)                      |
| GasderminD                   | Pyroptosis                    | Activator | Caspase-1 drives pyroptosis through cleavage of Gasdermin D                                                                 | Man, S. et al. (2017)                                                |
| GasderminE                   | Pyroptosis                    | Activator | PANoptosome induces pyroptosis through cleavage of Gasdermin E                                                              | Man, S. et al. (2017)                                                |
| glycosylation                | S                             | Activator | Spike protein is highly glycosylated, if this is blocked can no longer enter cells efficiently                              | Yang, Q. et al. (2020); Walls, A. et al. (2020)                      |
| guanylyltransferase          | ViralsgRNAs                   | Activator | Unknown guanylyltransferase required for sgRNA capping, suspected to be host protein                                        | Nakagawa, K. et al. (2016)                                           |
| HostCap-dependentTranslation | HostProteinSynthesis          | Activator | Host proteins can be produced by both cap-dependent and -independent mechanisms (less efficient and not all proteins)       | Walters, B. et al. (2016)                                            |
| HostmRNAs                    | HostProteinSynthesis          | Activator | Host proteins can be produced by both cap-dependent and -independent mechanisms (less efficient and not all proteins)       | Walters, B. et al. (2016)                                            |
| HostProteinSynthesis         | IFN-I                         | Activator | IRF7 and IRF3 drive synthesis of type I IFNs                                                                                | Sa Ribero, M. et al. (2020)                                          |
| HostProteinSynthesis         | IFN-I_SG                      | Activator | IFN-I_SG leads to synthesis of ISG proteins                                                                                 | Sa Ribero, M. et al. (2020)                                          |
| HostProteinSynthesis         | IFN-II_SG                     | Activator | IFN-II_SG leads to synthesis of ISG proteins                                                                                | Sa Ribero, M. et al. (2020)                                          |
| HostProteinSynthesis         | IFN-III                       | Activator | IRF7 and IRF3 drive synthesis of type III IFNs                                                                              | Wack, A. et al. (2015)                                               |
| HostProteinSynthesis         | IFN-III_SG                    | Activator | IFN-III_SG leads to synthesis of ISG proteins                                                                               | Wack, A. et al. (2015)                                               |
| HostProteinSynthesis         | iNOS                          | Activator | TNF-α and IFN-II induce production of iNOS (NOS2)                                                                           | Karki, R. et al. (2021)                                              |
| IFITM                        | SyncytiaFormation             | Inhibitor | S protein induces syncytia formation, IFITM (mainly IFITM1) prevents formation but only in absence of TMPRSS2               | Buchrieser, J. et al. (2020)                                         |
| IFN-I                        | IFNAR                         | Activator | Secreted IFN-I bind to heterodimeric IFNAR1/2 receptor                                                                      | Sa Ribero, M. et al. (2020)                                          |
| IFN-I_SG                     | CH25H                         | Activator | CH25H is an ISG                                                                                                             | Zang, R. et al. (2020)                                               |
| IFN-I_SG                     | IFITM                         | Activator | IFITM1-3 are ISGs.                                                                                                          | Ribero, M. et al. (2020)                                             |

| From         | To                 | Type      | Explanation                                                                                                     | Reference                                                      |
|--------------|--------------------|-----------|-----------------------------------------------------------------------------------------------------------------|----------------------------------------------------------------|
| IFN-I_SG     | LY6E               | Activator | LY6E is an ISG                                                                                                  | Sa Ribero, M. et al. (2020)                                    |
| IFN-I_SG     | NF-kB              | Activator | Cytokines and other NF-kB targets are downstream of IFNAR signalling in a poorly understood mechanism           | Makris, S. et al. (2017); Goritzka, M. et al. (2014)           |
| IFN-I_SG     | OAS                | Activator | OASs are ISGs                                                                                                   | Schoggins, J. et al. (2011)                                    |
| IFN-I_SG     | PKR                | Activator | PKR is an ISG                                                                                                   | Sa Ribero, M. et al. (2020)                                    |
| IFN-I_SG     | ZAP                | Activator | ISG ZAP restricts viral RNA                                                                                     | Nchioua, R. et al. (2020)                                      |
| IFN-II       | CCL2               | Activator | CXCL9, CXCL10, CXCL11 and CCL2 are induced in lung cells by TNF-a, IL-1B and IFN-g                              | Pechkovsky, D. et al. (2005)                                   |
| IFN-II       | CXCL10             | Activator | CXCL9, CXCL10, CXCL11 and CCL2 are induced in lung cells by TNF-a, IL-1B and IFN-g                              | Pechkovsky, D. et al. (2005)                                   |
| IFN-II       | CXCL11             | Activator | CXCL9, CXCL10, CXCL11 and CCL2 are induced in lung cells by TNF-a, IL-1B and IFN-g                              | Pechkovsky, D. et al. (2005)                                   |
| IFN-II       | CXCL9              | Activator | CXCL9, CXCL10, CXCL11 and CCL2 are induced in lung cells by TNF-a, IL-1B and IFN-g                              | Pechkovsky, D. et al. (2005)                                   |
| IFN-II       | IFNGR              | Activator | IFN-II activates IFNGR1/2                                                                                       | Ivashkiv, L. (2018)                                            |
| IFN-II       | Inflammation       | Inhibitor | anti-inflammatory cytokine                                                                                      | Hamid, Q. et al. (2009)                                        |
| IFN-II       | TNF-a              | Activator | TNF-a produced by a range of immune cells in response to many stimuli including IFN-II, IL-1 and IL-2 and NF-kB | Falvo, J. et al. (2010)                                        |
| IFN-II_SG    | iNOS               | Activator | TNF-a and IFN-II induce production of iNOS (NOS2)                                                               | Karki, R. et al. (2021)                                        |
| IFN-II_SG    | ZAP                | Activator | ISG ZAP restricts viral RNA                                                                                     | Nchioua, R. et al. (2020)                                      |
| IFN-III      | IFN-LR1            | Activator | IFN-III interacts with heterodimeric IFN-lambdaR1, IL-10R2 receptor                                             | Wack, A. et al. (2015)                                         |
| IFN-III_SG   | CH25H              | Activator | CH25H is an ISG                                                                                                 | Zang, R. et al. (2020)                                         |
| IFN-III_SG   | IFITM              | Activator | IFITM1-3 are ISGs                                                                                               | Ribero, M. et al. (2020)                                       |
| IFN-III_SG   | LY6E               | Activator | LY6E is an ISG                                                                                                  | Sa Ribero, M. et al. (2020)                                    |
| IFN-III_SG   | OAS                | Activator | OASs are ISGs                                                                                                   | Schoggins, J. et al. (2011)                                    |
| IFN-III_SG   | PKR                | Activator | PKR is an ISG                                                                                                   | Sa Ribero, M. et al. (2020)                                    |
| IFN-III_SG   | ZAP                | Activator | ISG ZAP restricts viral RNA                                                                                     | Nchioua, R. et al. (2020)                                      |
| IFN-LR1      | IFN-III_SG         | Activator | IFN-III response requires IFN-LR1, Tyk2, Jak1, STAT1/2 and IRF9                                                 | Wack, A. et al. (2015)                                         |
| IFNAR        | IFN-I_SG           | Activator | IFN-I response requires IFNAR, Tyk2, Jak1, STAT1/2 and IRF9                                                     | Barrat, F. et al. (2019)                                       |
| IFNGR        | IFN-II_SG          | Activator | IFN-II response requires IFNGR, Jak2, Jak1, STAT1                                                               | Barrat, F. et al. (2019)                                       |
| IkBa         | NF-kB              | Inhibitor | Phosphorylation of I kB reduces its inhibitory activity towards NF-kB                                           | Liu, T. et al. (2017)                                          |
| IKK          | I kB               | Inhibitor | IKK inhibits I kB through phosphorylation                                                                       | Liu, T. et al. (2017)                                          |
| IL-10        | Inflammation       | Inhibitor | anti-inflammatory cytokine                                                                                      | Hamid, Q. et al. (2009)                                        |
| IL-10        | T-cellInfiltration | Activator | Speculative interaction based on inverse correlation                                                            | Chen, Z. et al. (2020); Dia0, B. (2020); Liu, J. (2020)        |
| IL-18        | IFN-II             | Activator | IFN-gamma produced by various immune cells in response to IL-12 or IL-18                                        | Ivashkiv, L. (2018)                                            |
| IL-1B        | CCL2               | Activator | CXCL9, CXCL10, CXCL11 and CCL2 are induced in lung cells by TNF-a, IL-1B and IFN-g                              | Pechkovsky, D. et al. (2005)                                   |
| IL-1B        | CXCL10             | Activator | CXCL9, CXCL10, CXCL11 and CCL2 are induced in lung cells by TNF-a, IL-1B and IFN-g                              | Pechkovsky, D. et al. (2005)                                   |
| IL-1B        | CXCL11             | Activator | CXCL9, CXCL10, CXCL11 and CCL2 are induced in lung cells by TNF-a, IL-1B and IFN-g                              | Pechkovsky, D. et al. (2005)                                   |
| IL-1B        | CXCL9              | Activator | CXCL9, CXCL10, CXCL11 and CCL2 are induced in lung cells by TNF-a, IL-1B and IFN-g                              | Pechkovsky, D. et al. (2005)                                   |
| IL-1B        | Inflammation       | Activator | pro-inflammatory cytokine                                                                                       | Hamid, Q. et al. (2009)                                        |
| IL-1B        | TNF-a              | Activator | TNF-a produced by a range of immune cells in response to many stimuli including IFN-II, IL-1 and IL-2 and NF-kB | Falvo, J. et al. (2010)                                        |
| IL-2         | TNF-a              | Activator | TNF-a produced by a range of immune cells in response to many stimuli including IFN-II, IL-1 and IL-2 and NF-kB | Falvo, J. et al. (2010)                                        |
| IL-6         | CCL2               | Activator | Inhibition of IL-6 causes decrease in IFN-, IL-8, IL-10 and CCL2 levels in Cytokine release syndrome            | Tanaka, T. et al. (2016)                                       |
| IL-6         | IL-10              | Activator | Inhibition of IL-6 causes decrease in IFN-, IL-8, IL-10 and CCL2 levels in Cytokine release syndrome            | Tanaka, T. et al. (2016)                                       |
| IL-6         | Inflammation       | Activator | pro-inflammatory cytokine                                                                                       | Hamid, Q. et al. (2009)                                        |
| IL-6         | T-cellInfiltration | Activator | Speculative interaction based on inverse correlation                                                            | Chen, Z. et al. (2020); Dia0, B. (2020)                        |
| IL-8         | Inflammation       | Activator | pro-inflammatory cytokine                                                                                       | Hamid, Q. et al. (2009)                                        |
| ImmuneCells  | IFN-II             | Activator | IFN-gamma produced by various immune cells in response to IL-12 or IL-18                                        | Ivashkiv, L. (2018)                                            |
| ImmuneCells  | IL-10              | Activator | IL-10 produced by nearly all leukocytes                                                                         | Kany, S. et al. (2019)                                         |
| ImmuneCells  | IL-2               | Activator | IL-2 primarily produced by T cells                                                                              | Liao, W. et al. (2013)                                         |
| ImmuneCells  | TNF-a              | Activator | TNF-a produced by a range of immune cells in response to many stimuli including IFN-II, IL-1 and IL-2 and NF-kB | Falvo, J. et al. (2010)                                        |
| Inflammasome | Caspase-1          | Activator | ASC, NLRP3 and pro-caspase-1 form inflammasome leading to activation of Caspase-1                               | Lee, S. et al. (2020)                                          |
| iNOS         | NO                 | Activator | iNOS catalyzes production of NO                                                                                 | Karki, R. et al. (2021)                                        |
| IRE1         | IKK                | Activator | IRE1 interacts with TRAF2, leading to JNK activation and I kB inhibition                                        | Pathinayake, P. et al. (2018)                                  |
| IRE1         | JNK                | Activator | IRE1 interacts with TRAF2, leading to JNK activation and I kB inhibition                                        | Pathinayake, P. et al. (2018)                                  |
| IRE1         | XBP1               | Activator | IRE1 splices XBP1 mRNA                                                                                          | Pathinayake, P. et al. (2018)                                  |
| IRF3         | IFN-I              | Activator | IRF7 and IRF3 drive synthesis of type I IFNs                                                                    | Sa Ribero, M. et al. (2020)                                    |
| IRF3         | IFN-III            | Activator | IRF7 and IRF3 drive synthesis of type III IFNs                                                                  | Wack, A. et al. (2015)                                         |
| IRF7         | IFN-I              | Activator | IRF7 and IRF3 drive synthesis of type I IFNs                                                                    | Sa Ribero, M. et al. (2020)                                    |
| IRF7         | IFN-III            | Activator | IRF7 and IRF3 drive synthesis of type III IFNs                                                                  | Wack, A. et al. (2015)                                         |
| IRF9         | IFN-I_SG           | Activator | IFN-I response requires IFNAR, Tyk2, Jak1, STAT1/2 and IRF9                                                     | Barrat, F. et al. (2019)                                       |
| IRF9         | IFN-III_SG         | Activator | IFN-III response requires IFN-LR1, Tyk2, Jak1, STAT1/2 and IRF9                                                 | Wack, A. et al. (2015)                                         |
| Jak1         | IFN-I_SG           | Activator | IFN-I response requires IFNAR, Tyk2, Jak1, STAT1/2 and IRF9                                                     | Barrat, F. et al. (2019)                                       |
| Jak1         | IFN-II_SG          | Activator | IFN-II response requires IFNGR, Jak2, Jak1, STAT1                                                               | Barrat, F. et al. (2019)                                       |
| Jak1         | IFN-III_SG         | Activator | IFN-III response requires IFN-LR1, Tyk2, Jak1, STAT1/2 and IRF9                                                 | Wack, A. et al. (2015)                                         |
| Jak2         | IFN-II_SG          | Activator | IFN-II response requires IFNGR, Jak2, Jak1, STAT1                                                               | Barrat, F. et al. (2019)                                       |
| JNK          | Caspase-3          | Activator | Ire1 activation as a result of ER stress can cause apoptosis in a p38 and JNK mediated way                      | Redza-Dutordoir, M. et al. (2016)                              |
| LY6E         | ViralEntry         | Inhibitor | ISG LY6E interferes with S protein membrane fusion                                                              | Vabret, N. (2020); Plaender, S. (2020); Zhao, X. et al. (2020) |
| LY6E         | ViralEntry1        | Inhibitor | ISG LY6E interferes with S protein membrane fusion                                                              | Vabret, N. (2020); Plaender, S. (2020); Zhao, X. et al. (2020) |
| M            | STAT1              | Inhibitor | nsp1, nsp6, nsp13, p3a, M p7b inhibit STAT1 phosphorylation                                                     | Xia, H. et al. (2020)                                          |
| M            | VirionERGIC        | Activator | Structural proteins form virion in endoplasmic reticulum-Golgi intermediate compartment (ERGIC)                 | Fehr, A. et al. (2015)                                         |
| MasR         | Nox4               | Inhibitor | ACE2 and Ang1-7 protect against PF by reduction of Nox4 induction                                               | Meng, Y. et al. (2015)                                         |
| MasR         | p38                | Inhibitor | MasR opposed AT1R activity                                                                                      | Forrester, S. et al. (2018)                                    |
| MAVS         | CytosolicPRRs      | Activator | Cytosolic PRR signalling requires PRRs MDA5 or RIG-1 and adaptors MAVS and STING                                | Mogensen, T. (2009)                                            |
| MDA5         | CytosolicPRRs      | Activator | Cytosolic PRR signalling requires PRRs MDA5 or RIG-1 and adaptors MAVS and STING                                | Mogensen, T. (2009)                                            |
| MLKL         | Necroptosis        | Activator | PANoptosome induces necroptosis through MLKL                                                                    | Man, S. et al. (2017)                                          |
| mTORC1       | 4E-BP              | Inhibitor | phosphorylation of 4E-BP by mTOR prevents association with eIF4E                                                | Sonenberg, N. et al. (2009)                                    |
| mTORC1       | eIF4G              | Activator | mTOR responsible (possibly indirectly) for activatory eIF4G phosphorylation                                     | Sonenberg, N. et al. (2009)                                    |
| mTORC1       | S6K                | Activator | mTOR responsible (possibly indirectly) for activatory S6K phosphorylation                                       | Sonenberg, N. et al. (2009)                                    |
| N            | IFN-I              | Inhibitor | p6, p8 and N inhibit IFN-beta production and NF-kB responsive promoter                                          | Li, J. et al. (2021)                                           |
| N            | IFN-III            | Inhibitor | p6, p8 and N inhibit IFN-beta production and NF-kB responsive promoter, IFN-III has similar promoter to IFN-I   | Wack, A. et al. (2015); Li, J. et al. (2021)                   |
| N            | ViralGenome        | Activator | N protein interacts with nsp3, this interaction required for RNA transcription.                                 | Cong, Y. (2020)                                                |
| N            | ViralsgRNAs        | Activator | N protein interacts with nsp3, this interaction required for RNA transcription.                                 | Cong, Y. (2020)                                                |
| N            | VirionERGIC        | Activator | Structural proteins form virion in endoplasmic reticulum-Golgi intermediate compartment (ERGIC)                 | Fehr, A. et al. (2015)                                         |
| Necroptosis  | CellDeath          | Activator | Cell death may occur via apoptosis, necroptosis or pyroptosis                                                   |                                                                |
| NF-kB        | Caspase-3          | Inhibitor | NF-kB induces transcription of pro-survival genes                                                               | Song, G. et al. (2005)                                         |
| NF-kB        | IL-18              | Activator | NF-kB induces transcription of NLRP3, pro-IL-18 and pro-IL-1B                                                   | Liu, T. et al. (2017)                                          |
| NF-kB        | IL-1B              | Activator | NF-kB induces transcription of NLRP3, pro-IL-18 and pro-IL-1B                                                   | Liu, T. et al. (2017)                                          |
| NF-kB        | IL-2               | Activator | NF-kB induces production of many cytokines including TNF-a, IL-2, IL-6, IL-8, IL-12, CCL2                       | Liu, T. et al. (2017)                                          |
| NF-kB        | IL-6               | Activator | NF-kB induces production of many cytokines including TNF-a, IL-2, IL-6, IL-8, IL-12, CCL2                       | Liu, T. et al. (2017)                                          |

| From                | To                             | Type      | Explanation                                                                                                                  | Reference                                                          |
|---------------------|--------------------------------|-----------|------------------------------------------------------------------------------------------------------------------------------|--------------------------------------------------------------------|
| NF-κB               | IL-8                           | Activator | NF-κB induces production of many cytokines including TNF-α, IL-2, IL-6, IL-8, IL-12, CCL2                                    | Liu, T. et al. (2017)                                              |
| NF-κB               | TNF-α                          | Activator | NF-κB induces production of many cytokines including TNF-α, IL-2, IL-6, IL-8, IL-12, CCL2                                    | Liu, T. et al. (2017)                                              |
| NKRF                | IL-6                           | Inhibitor | NKRF modulates NF-κB activity towards IL-6 and IL-8 specifically                                                             | Vabret, N. (2020); Li, J. et al. (2021)                            |
| NKRF                | IL-8                           | Inhibitor | NKRF modulates NF-κB activity towards IL-6 and IL-8 specifically                                                             | Vabret, N. (2020); Li, J. et al. (2021)                            |
| NLRP3               | Inflammasome                   | Activator | ASC, NLRP3 and pro-caspase-1 form inflammasome leading to activation of Caspase-1                                            | Lee, S. et al. (2020)                                              |
| NLRP3               | PANoptosome                    | Activator | PANoptosome formed from Caspase-8, NLRP3, ASC, RIPK1 as well as RIPK3 and FADD                                               | Christgen, S. et al. (2020)                                        |
| NO                  | Caspase-8                      | Activator | NO thought to act through caspase-8                                                                                          | Karki, R. et al. (2021)                                            |
| Nox4                | ROS                            | Activator | Nox4 is the Nox family protein primarily responsible for ROS production in PF                                                | Hecker, L. (2009)                                                  |
| nsp1                | Cap-independent Translation    | Inhibitor | nsp1 inhibits host translation and promotes viral translation through binding of the 40S ribosome                            | Banerjee, A. (2020); Thoms, M. (2020); Schubert, K. et al. (2020)  |
| nsp1                | HostCap-dependent Translation  | Inhibitor | nsp1 inhibits host translation and promotes viral translation through binding of the 40S ribosome                            | Banerjee, A. (2020); Thoms, M. (2020); Schubert, K. et al. (2020)  |
| nsp1                | STAT1                          | Inhibitor | nsp1, nsp6, nsp13, p3a, M p7b inhibit STAT1 phosphorylation                                                                  | Xia, H. et al. (2020)                                              |
| nsp1                | ViralCap-dependent Translation | Activator | nsp1 inhibits host translation and promotes viral translation through binding of the 40S ribosome                            | Banerjee, A. (2020); Thoms, M. (2020); Schubert, K. et al. (2020)  |
| nsp1_nsp2_nsp3_nsp4 | nsp1                           | Activator | nsp1-4 is cleaved into individual proteins by PLpro                                                                          | Fehr, A. et al. (2015)                                             |
| nsp1_nsp2_nsp3_nsp4 | nsp2                           | Activator | nsp1-4 is cleaved into individual proteins by PLpro                                                                          | Fehr, A. et al. (2015)                                             |
| nsp1_nsp2_nsp3_nsp4 | nsp3                           | Activator | nsp1-4 is cleaved into individual proteins by PLpro                                                                          | Fehr, A. et al. (2015)                                             |
| nsp1_nsp2_nsp3_nsp4 | nsp4                           | Activator | nsp1-4 is cleaved into individual proteins by PLpro                                                                          | Fehr, A. et al. (2015)                                             |
| nsp1_nsp2_nsp3_nsp4 | NKRF                           | Inhibitor | Nsp9/10 stimulate IL6/8 production through inhibition of Nsp9/10                                                             | Li, J. et al. (2021)                                               |
| nsp10               | nsp10-nsp14                    | Activator | Interaction of nsp10 with nsp14 required for ExoN (proof-reading) activity but not N7-MTase activity.                        | Bouvet, M. et al. (2010)                                           |
| nsp10               | nsp10-nsp16                    | Activator | nsp16 2'O-MTase activity depends on interaction with nsp10                                                                   | Bouvet, M. et al. (2010)                                           |
| nsp10-nsp14         | ViralGenome                    | Activator | nsp10-nsp14 acts as a ExoN, proofreading the viral genome                                                                    | Bouvet, M. et al. (2012)                                           |
| nsp10-nsp16         | ViralsgRNAs                    | Activator | nsp10-nsp16 functions as 2'O-MTase, ensuring viral mRNAs are correctly capped                                                | Bouvet, M. et al. (2010)                                           |
| nsp12               | nsp12-nsp7-nsp8                | Activator | Complex formed of nsp12-nsp7-nsp8 required for RdRp activity.                                                                | Subissi, L. (2014); Kirchoerfer, R. et al. (2019); Chen, J. (2020) |
| nsp12-nsp7-nsp8     | ViralGenome                    | Activator | Complex formed of nsp12-nsp7-nsp8 required for RdRp activity. Note nsp13 has been observed binding to this complex.          | Subissi, L. (2014); Chen, J. (2020)                                |
| nsp12-nsp7-nsp8     | ViralsgRNAs                    | Activator | Complex formed of nsp12-nsp7-nsp8 required for RdRp activity. Note nsp13 has been observed binding to this complex.          | Subissi, L. (2014); Chen, J. (2020)                                |
| nsp13               | IRF3                           | Inhibitor | nsp13, nsp14 and nsp15 found to inhibit nuclear localization of IRF3                                                         | Yuen, C. et al. (2020)                                             |
| nsp13               | STAT1                          | Inhibitor | nsp1, nsp6, nsp13, p3a, M p7b inhibit STAT1 phosphorylation                                                                  | Xia, H. et al. (2020)                                              |
| nsp13               | STAT2                          | Inhibitor | nsp6, nsp13, p7a, p7b inhibit STAT2 phosphorylation                                                                          | Xia, H. et al. (2020)                                              |
| nsp13               | ViralGenome                    | Activator | nsp13 helicase has been observed in complex with nsp12-nsp7-nsp8                                                             | Fehr, A. et al. (2015); Chen, J. (2020)                            |
| nsp13               | ViralsgRNAs                    | Activator | nsp13 helicase has been observed in complex with nsp12-nsp7-nsp8                                                             | Fehr, A. et al. (2015); Chen, J. (2020)                            |
| nsp13               | IRF3                           | Inhibitor | nsp13, nsp14 and nsp15 found to inhibit nuclear localization of IRF3                                                         | Yuen, C. et al. (2020)                                             |
| nsp14               | nsp10-nsp14                    | Activator | Interaction of nsp10 with nsp14 required for ExoN (proof-reading) activity but not N7-MTase activity.                        | Bouvet, M. et al. (2010); Bouvet, M. et al. (2012)                 |
| nsp14               | ViralsgRNAs                    | Activator | nsp14 functions as N7-MTase, ensuring viral mRNAs are correctly capped                                                       | Bouvet, M. et al. (2010); Ogando, N. et al. (2020)                 |
| nsp15               | CytosolicPRRs                  | Inhibitor | nsp15 EndoU activity cleaves polyUs from viral sgRNAs, preventing their recognition by MDAs.                                 | Hackbart, M. et al. (2020)                                         |
| nsp15               | IRF3                           | Inhibitor | nsp13, nsp14 and nsp15 found to inhibit nuclear localization of IRF3                                                         | Yuen, C. et al. (2020)                                             |
| nsp16               | nsp10-nsp16                    | Activator | nsp16 2'O-MTase activity depends on interaction with nsp10.                                                                  | Bouvet, M. et al. (2010); Viswanathan, T. (2020)                   |
| nsp16               | U1_U2snRNAs                    | Inhibitor | nsp16 binds U1/U2 snRNAs inhibiting splicing                                                                                 | Banerjee, A. (2020)                                                |
| nsp3                | DMVformation                   | Activator | Double Membrane Vesicles are formed by nsp3, nsp4 and nsp6, these DMVs contain a pore consisting of a hexameric nsp3 complex | Angelini, M. et al. (2013); Wolff, G. (2020)                       |
| nsp3                | PLpro                          | Activator | PL protease activity lies in nsp3, uncleaved pp1a and pp1ab also contain this domain                                         | Fehr, A. et al. (2015)                                             |
| nsp4                | DMVformation                   | Activator | Double Membrane Vesicles are formed by nsp3, nsp4 and nsp6                                                                   | Angelini, M. et al. (2013)                                         |
| nsp5                | 3CLpro                         | Activator | 3CL protease activity lies in nsp5, uncleaved pp1a and pp1ab also contain this domain                                        | Fehr, A. et al. (2015)                                             |
| nsp6                | DMVformation                   | Activator | Double Membrane Vesicles are formed by nsp3, nsp4 and nsp6                                                                   | Angelini, M. et al. (2013)                                         |
| nsp6                | IRF3                           | Inhibitor | nsp6 binds TBK1 preventing activation of IRF3                                                                                | Xia, H. et al. (2020)                                              |
| nsp6                | STAT1                          | Inhibitor | nsp1, nsp6, nsp13, p3a, M p7b inhibit STAT1 phosphorylation                                                                  | Xia, H. et al. (2020)                                              |
| nsp6                | STAT2                          | Inhibitor | nsp6, nsp13, p7a, p7b inhibit STAT2 phosphorylation                                                                          | Xia, H. et al. (2020)                                              |
| nsp7                | nsp12-nsp7-nsp8                | Activator | Complex formed of nsp12-nsp7-nsp8 required for RdRp activity.                                                                | Subissi, L. (2014); Kirchoerfer, R. et al. (2019); Chen, J. (2020) |
| nsp8                | 7SL                            | Inhibitor | nsp8 and 9 bind and inhibit 7SL                                                                                              | Banerjee, A. (2020)                                                |
| nsp8                | nsp12-nsp7-nsp8                | Activator | Complex formed of nsp12-nsp7-nsp8 required for RdRp activity.                                                                | Subissi, L. (2014); Kirchoerfer, R. et al. (2019); Chen, J. (2020) |
| nsp9                | 7SL                            | Inhibitor | nsp8 and 9 bind and inhibit 7SL                                                                                              | Banerjee, A. (2020)                                                |
| nsp9                | NKRF                           | Inhibitor | Nsp9/10 stimulate IL6/8 production through inhibition of Nsp9/10                                                             | Li, J. et al. (2021)                                               |
| OAS                 | RNaseL                         | Activator | OASs activate RNaseL                                                                                                         | Schoggins, J. et al. (2011)                                        |
| p105                | NF-κB                          | Activator | p105 is a precursor protein of NF-κB                                                                                         | Hayden, M. et al. (2014)                                           |
| p38                 | Caspase-3                      | Activator | Ire1 activation as a result of ER stress can cause apoptosis in a p38 and JNK mediated way                                   | Redza-Dutoroir, M. et al. (2016)                                   |
| p3a                 | ASC                            | Activator | p3a promotes TRAF3-mediated ubiquitination of p105 and ASC (TRAF3 binding domain of ORF3a conserved from SARS-COV            | Siu, K. et al. (2019); Issa, E. et al. (2020)                      |
| p3a                 | Caspase-8                      | Activator | p3a induces apoptosis through caspase-8 activation                                                                           | Ren, Y. et al. (2020)                                              |
| p3a                 | ERstress                       | Activator | ORF3 expression induces expression of genes indicative of ER stress                                                          | Zhang, X. et al. (2020)                                            |
| p3b                 | IRF3                           | Inhibitor | p3b inhibits IFN expression by preventing IRF3 nuclear localization                                                          | Konno, Y. et al. (2020)                                            |
| p6                  | IRF3                           | Inhibitor | p6 prevents IRF3 nuclear translocation                                                                                       | Xia, H. et al. (2020); Lei, X. et al. (2020); Li, J. et al. (2021) |
| p6                  | STAT1                          | Inhibitor | p6 binds Nup98-Rae1 preventing nuclear import of STAT1/2 to inhibit ISG expression                                           | Miorin, L. (2020); Lei, X. et al. (2020); Li, J. et al. (2021)     |
| p6                  | STAT2                          | Inhibitor | p6 binds Nup98-Rae1 preventing nuclear import of STAT1/2 to inhibit ISG expression                                           | Miorin, L. (2020); Lei, X. et al. (2020); Li, J. et al. (2021)     |
| p7a                 | STAT2                          | Inhibitor | nsp6, nsp13, p7a, p7b inhibit STAT2 phosphorylation                                                                          | Xia, H. et al. (2020)                                              |
| p7b                 | STAT1                          | Inhibitor | nsp1, nsp6, nsp13, p3a, M p7b inhibit STAT1 phosphorylation                                                                  | Xia, H. et al. (2020)                                              |
| p7b                 | STAT2                          | Inhibitor | nsp6, nsp13, p7a, p7b inhibit STAT2 phosphorylation                                                                          | Xia, H. et al. (2020)                                              |
| p8                  | IFN-1                          | Inhibitor | p6, p8 and N inhibit IFN-beta production and NF-κB responsive promoter                                                       | Li, J. et al. (2021)                                               |
| p8                  | IFN-III                        | Inhibitor | IFN-III has similar promoter to IFN-I                                                                                        | Wack, A. et al. (2015); Li, J. et al. (2021)                       |
| PANoptosome         | Caspase-3                      | Activator | PANoptosome induces apoptosis through caspase-3                                                                              | Karki, R. et al. (2021)                                            |
| PANoptosome         | GasderminE                     | Activator | PANoptosome induces pyroptosis through cleavage of Gasdermin E                                                               | Karki, R. et al. (2021)                                            |
| PANoptosome         | MLKL                           | Activator | PANoptosome induces necroptosis through MLKL                                                                                 | Karki, R. et al. (2021)                                            |
| PERK                | eIF2                           | Inhibitor | phosphorylation of eIF2 prevents activation by its GEF eIF2B                                                                 | Sonenberg, N. et al. (2009)                                        |
| PI3K                | Akt                            | Activator | PI3K phosphorylates Akt                                                                                                      | Song, G. et al. (2005)                                             |
| PIKfyve             | TPC2                           | Activator | Production of PI(3,5)P2, mediated by TPC2, contributes to viral entry                                                        | Ou, X. (2020)                                                      |
| PKC                 | ERK                            | Activator | ERK1/2 activated by AT1R through PKC and EGFR                                                                                | Forrester, S. (2018)                                               |
| PKC                 | ROCK                           | Activator | PKC activity required for AngII/AT1R induced RhoA/ROCK activity                                                              | Forrester, S. (2018)                                               |
| PKR                 | Caspase-8                      | Activator | PKR can induce apoptosis through the FADD/caspase8/caspase3 pathway                                                          | Gal-Ben-Ari, S. et al. (2018)                                      |
| PKR                 | eIF2                           | Inhibitor | phosphorylation of eIF2 prevents activation by its GEF eIF2B                                                                 | Sonenberg, N. et al. (2009)                                        |
| PKR                 | IKK                            | Activator | PKR inhibits IκBα through direct phosphorylation                                                                             | Gal-Ben-Ari, S. et al. (2018); Bonnet, M. et al. (2006)            |
| PLpro               | IRF3                           | Inhibitor | nsp3 cleaves ISG15-modified proteins, leading to lower TBK1 phosphorylation                                                  | Shin, D. (2020)                                                    |
| PLpro               | nsp1                           | Activator | nsp1-4 is cleaved into individual proteins by PL pro                                                                         | Fehr, A. et al. (2015)                                             |
| PLpro               | nsp2                           | Activator | nsp1-4 is cleaved into individual proteins by PL pro                                                                         | Fehr, A. et al. (2015)                                             |
| PLpro               | nsp3                           | Activator | nsp1-4 is cleaved into individual proteins by PL pro                                                                         | Fehr, A. et al. (2015)                                             |
| PLpro               | nsp4                           | Activator | nsp1-4 is cleaved into individual proteins by PL pro                                                                         | Fehr, A. et al. (2015)                                             |
| PLpro               | ViralGenome                    | Activator | nsp3 important to mediate interaction of N with RTC                                                                          | Cong, Y. et al. (2020)                                             |
| PLpro               | ViralsgRNAs                    | Activator | nsp3 important to mediate interaction of N with RTC                                                                          | Cong, Y. et al. (2020)                                             |
| pp1a                | 3CLpro                         | Activator | 3CL protease activity lies in nsp5, uncleaved pp1a and pp1ab also contain this domain                                        | Fehr, A. et al. (2015)                                             |
| pp1a                | nsp1_nsp2_nsp3_nsp4            | Activator | pp1a is cleaved into a single nsp1-4 and then all nsp5 to 11 by 3CLpro                                                       | Fehr, A. et al. (2015)                                             |
| pp1a                | nsp10                          | Activator | pp1a is cleaved into a single nsp1-4 and then all nsp5 to 11 by 3CLpro                                                       | Fehr, A. et al. (2015)                                             |
| pp1a                | nsp11                          | Activator | pp1ab is cleaved into a single nsp1-4 and then all nsp5 to 16 by 3CLpro (nsp11 becomes nsp12 in pp1ab)                       | Fehr, A. et al. (2015)                                             |

| From                     | To                     | Type      | Explanation                                                                                                                       | Reference                                               |
|--------------------------|------------------------|-----------|-----------------------------------------------------------------------------------------------------------------------------------|---------------------------------------------------------|
| pp1a                     | nsp5                   | Activator | pp1a is cleaved into a single nsp1-4 and then all nsps 5 to 11 by 3CLpro                                                          | Fehr, A. et al. (2015)                                  |
| pp1a                     | nsp6                   | Activator | pp1a is cleaved into a single nsp1-4 and then all nsps 5 to 11 by 3CLpro                                                          | Fehr, A. et al. (2015)                                  |
| pp1a                     | nsp7                   | Activator | pp1a is cleaved into a single nsp1-4 and then all nsps 5 to 11 by 3CLpro                                                          | Fehr, A. et al. (2015)                                  |
| pp1a                     | nsp8                   | Activator | pp1a is cleaved into a single nsp1-4 and then all nsps 5 to 11 by 3CLpro                                                          | Fehr, A. et al. (2015)                                  |
| pp1a                     | nsp9                   | Activator | pp1a is cleaved into a single nsp1-4 and then all nsps 5 to 11 by 3CLpro                                                          | Fehr, A. et al. (2015)                                  |
| pp1a                     | PLpro                  | Activator | PL protease activity lies in nsp3, uncleaved pp1a and pp1ab also contain this domain                                              |                                                         |
| pp1ab                    | 3CLpro                 | Activator | 3CL protease activity lies in nsp5, uncleaved pp1a and pp1ab also contain this domain                                             |                                                         |
| pp1ab                    | nsp1_nsp2_nsp3_nsp4    | Activator | pp1ab is cleaved into a single nsp1-4 and then all nsps 5 to 16 by 3CLpro (nsp11 becomes nsp12 in pp1ab)                          | Fehr, A. et al. (2015)                                  |
| pp1ab                    | nsp10                  | Activator | pp1ab is cleaved into a single nsp1-4 and then all nsps 5 to 16 by 3CLpro (nsp11 becomes nsp12 in pp1ab)                          | Fehr, A. et al. (2015)                                  |
| pp1ab                    | nsp12                  | Activator | pp1ab is cleaved into a single nsp1-4 and then all nsps 5 to 16 by 3CLpro (nsp11 becomes nsp12 in pp1ab)                          | Fehr, A. et al. (2015)                                  |
| pp1ab                    | nsp13                  | Activator | pp1ab is cleaved into a single nsp1-4 and then all nsps 5 to 16 by 3CLpro (nsp11 becomes nsp12 in pp1ab)                          | Fehr, A. et al. (2015)                                  |
| pp1ab                    | nsp14                  | Activator | pp1ab is cleaved into a single nsp1-4 and then all nsps 5 to 16 by 3CLpro (nsp11 becomes nsp12 in pp1ab)                          | Fehr, A. et al. (2015)                                  |
| pp1ab                    | nsp15                  | Activator | pp1ab is cleaved into a single nsp1-4 and then all nsps 5 to 16 by 3CLpro (nsp11 becomes nsp12 in pp1ab)                          | Fehr, A. et al. (2015)                                  |
| pp1ab                    | nsp16                  | Activator | pp1ab is cleaved into a single nsp1-4 and then all nsps 5 to 16 by 3CLpro (nsp11 becomes nsp12 in pp1ab)                          | Fehr, A. et al. (2015)                                  |
| pp1ab                    | nsp5                   | Activator | pp1ab is cleaved into a single nsp1-4 and then all nsps 5 to 16 by 3CLpro (nsp11 becomes nsp12 in pp1ab)                          | Fehr, A. et al. (2015)                                  |
| pp1ab                    | nsp6                   | Activator | pp1ab is cleaved into a single nsp1-4 and then all nsps 5 to 16 by 3CLpro (nsp11 becomes nsp12 in pp1ab)                          | Fehr, A. et al. (2015)                                  |
| pp1ab                    | nsp7                   | Activator | pp1ab is cleaved into a single nsp1-4 and then all nsps 5 to 16 by 3CLpro (nsp11 becomes nsp12 in pp1ab)                          | Fehr, A. et al. (2015)                                  |
| pp1ab                    | nsp8                   | Activator | pp1ab is cleaved into a single nsp1-4 and then all nsps 5 to 16 by 3CLpro (nsp11 becomes nsp12 in pp1ab)                          | Fehr, A. et al. (2015)                                  |
| pp1ab                    | nsp9                   | Activator | pp1ab is cleaved into a single nsp1-4 and then all nsps 5 to 16 by 3CLpro (nsp11 becomes nsp12 in pp1ab)                          | Fehr, A. et al. (2015)                                  |
| pp1ab                    | PLpro                  | Activator | PL protease activity lies in nsp3, uncleaved pp1a and pp1ab also contain this domain                                              |                                                         |
| Pyroptosis               | CellDeath              | Activator | Cell death may occur via apoptosis, necroptosis or pyroptosis                                                                     |                                                         |
| RIG-1                    | CytosolicPRRs          | Activator | Cytosolic PRR signalling requires PRRs MDA5 or RIG-1 and adaptors MAVS and STING                                                  | Mogensen, T. (2009)                                     |
| RIPK1                    | Caspase-10             | Activator | Cytosolic PRRs can induce NF-kB through caspase8/10 using RIP1                                                                    | Mogensen, T. (2009)                                     |
| RIPK1                    | Caspase-8              | Activator | Cytosolic PRRs can induce NF-kB through caspase8/10 using RIP1                                                                    | Mogensen, T. (2009)                                     |
| RIPK1                    | PANoptosome            | Activator | PANoptosome formed from Caspase-8, NLRP3, ASC, RIPK1 as well as RIPK3 and FADD                                                    | Christgen, S. et al. (2020)                             |
| RIPK1                    | TLR3-TRIF              | Activator | TLR3/4 signalling using TRIF adaptor requires TRAF3,6 E3 ligases and adaptors TANK and RIP1                                       | Mogensen, T. (2009)                                     |
| RNAseL                   | ViralGenomeDegradation | Inhibitor | RNAseL destroys RNA                                                                                                               | Schoggins, J. et al. (2011)                             |
| RNAseL                   | ViralsgRNAs            | Inhibitor | RNAseL destroys RNA                                                                                                               | Schoggins, J. et al. (2011)                             |
| ROCK                     | Fibrosis               | Activator | AngII induced PF mediated by ROS and ROCK                                                                                         | Kondrikov, D. et al. (2011)                             |
| ROS                      | ADAM17                 | Activator | ADAM17 activity induced by Nox4-dependent ROS production (possibly phosphorylated)                                                | Forrester, S. et al. (2016)                             |
| ROS                      | EGFR                   | Activator | AngII/AT1R induce EGFR transactivation through ROS                                                                                | Forrester, S. (2018)                                    |
| ROS                      | JNK                    | Activator | JNK activity induced by ROS                                                                                                       | Redza-Dutoir, M. et al. (2016)                          |
| ROS                      | ROCK                   | Activator | AngII induced fibrosis mediated by ROS and ROCK                                                                                   | Kondrikov, D. et al. (2011)                             |
| S                        | ERstress               | Activator | Spike protein expression causes UPR ER stress                                                                                     | Chan, C. et al. (2006)                                  |
| S                        | SyncytiaFormation      | Activator | S protein induces syncytia formation, IFITM (mainly IFITM1) prevents formation but only in absence of TMPRSS2                     | Buchrieser, J. et al. (2020)                            |
| S                        | VirionERGIC            | Activator | Structural proteins form virion in endoplasmic reticulum-Golgi intermediate compartment (ERGIC)                                   | Fehr, A. et al. (2015)                                  |
| S6K                      | eIF4B                  | Activator | eIF4B activated by phosphorylation by S6K1                                                                                        | Magnuson, B. et al. (2012)                              |
| SensitivityOfIFNResponse | IFN-I                  | Activator | Sensitivity of IFN response                                                                                                       |                                                         |
| SensitivityOfIFNResponse | IFN-III                | Activator | Sensitivity of IFN response                                                                                                       |                                                         |
| Splicing                 | HostmRNAs              | Activator | Improperly spliced mRNAs are destroyed by nonsense-mediated mRNA decay, and may not be able to be translated into proper protein. | Kurosaki, T. et al. (2019)                              |
| SRP                      | IFN-I                  | Activator | SRP required to export IFNs                                                                                                       | Banerjee, A. (2020)                                     |
| SRP                      | IFN-III                | Activator | SRP required to export IFNs                                                                                                       | Banerjee, A. (2020)                                     |
| STAT1                    | IFN-I_SG               | Activator | IFN-I response requires IFNAR, Tyk2, Jak1, STAT1/2 and IRF9                                                                       | Barrat, F. et al. (2019)                                |
| STAT1                    | IFN-II_SG              | Activator | IFN-II response requires IFNGR, Jak2, Jak1, STAT1                                                                                 | Barrat, F. et al. (2019)                                |
| STAT1                    | IFN-III_SG             | Activator | IFN-III response requires IFN-LR1, Tyk2, Jak1, STAT1/2 and IRF9                                                                   | Wack, A. et al. (2015)                                  |
| STAT2                    | IFN-I_SG               | Activator | IFN-I response requires IFNAR, Tyk2, Jak1, STAT1/2 and IRF9                                                                       | Barrat, F. et al. (2019)                                |
| STAT2                    | IFN-III_SG             | Activator | IFN-III response requires IFN-LR1, Tyk2, Jak1, STAT1/2 and IRF9                                                                   | Wack, A. et al. (2015)                                  |
| STING                    | CytosolicPRRs          | Activator | Cytosolic PRR signalling requires PRRs MDA5 or RIG-1 and adaptors MAVS and STING                                                  | Mogensen, T. (2009)                                     |
| TAK1                     | IKK                    | Activator | TAK1 activates the IKK complex                                                                                                    | Mogensen, T. (2009)                                     |
| TAK1                     | JNK                    | Activator | TAK1 promotes MAPK activity through phosphorylation of MKK proteins                                                               | Mogensen, T. (2009)                                     |
| TAK1                     | p38                    | Activator | TAK1 promotes MAPK activity through phosphorylation of MKK proteins                                                               | Mogensen, T. (2009)                                     |
| TANK                     | TBK1                   | Activator | Cytosolic PRRs together with TRAF3 and TANK1 can induce IFN through TBK1                                                          | Mogensen, T. (2009)                                     |
| TANK                     | TLR3-TRIF              | Activator | TLR3/4 signalling using TRIF adaptor requires TRAF3,6 E3 ligases and adaptors TANK and RIP1                                       | Mogensen, T. (2009)                                     |
| TBK1                     | IRF3                   | Activator | TBK1 (and redundantly IKKepsilon) phosphorylate IRF3/7                                                                            | Mogensen, T. (2009)                                     |
| TBK1                     | IRF7                   | Activator | TBK1 (and redundantly IKKepsilon) phosphorylate IRF3/7                                                                            | Mogensen, T. (2009)                                     |
| TLR3                     | TLR3-TRIF              | Activator | TLR3/4 signalling using TRIF adaptor requires TRAF3,6 E3 ligases and adaptors TANK and RIP1                                       | Mogensen, T. (2009)                                     |
| TLR3-TRIF                | TAK1                   | Activator | TLR3/4-TRIF can induce NF-kB through TAK1                                                                                         | Mogensen, T. (2009)                                     |
| TLR3-TRIF                | TBK1                   | Activator | TLR3/4-TRIF can induce IFN signalling through TBK1                                                                                | Mogensen, T. (2009)                                     |
| TMPrSS2                  | ViralFusion            | Activator | Fusion of viral and cellular membranes requires proteolytic cleavage of the spike.                                                | Fehr, A. et al. (2015); Shang, J. et al. (2020)         |
| TMPrSS2                  | SycytiaFormation       | Activator | S protein induces syncytia formation, IFITM (mainly IFITM1) prevents formation but only in absence of TMPrSS2                     | Buchrieser, J. et al. (2020)                            |
| TNF-a                    | CCL2                   | Activator | CXCL9, CXCL10, CXCL11 and CCL2 are induced in lung cells by TNF-a, IL-1B and IFN-g                                                | Pechkovsky, D. et al. (2005)                            |
| TNF-a                    | CXCL10                 | Activator | CXCL9, CXCL10, CXCL11 and CCL2 are induced in lung cells by TNF-a, IL-1B and IFN-g                                                | Pechkovsky, D. et al. (2005)                            |
| TNF-a                    | CXCL11                 | Activator | CXCL9, CXCL10, CXCL11 and CCL2 are induced in lung cells by TNF-a, IL-1B and IFN-g                                                | Pechkovsky, D. et al. (2005)                            |
| TNF-a                    | CXCL9                  | Activator | CXCL9, CXCL10, CXCL11 and CCL2 are induced in lung cells by TNF-a, IL-1B and IFN-g                                                | Pechkovsky, D. et al. (2005)                            |
| TNF-a                    | Inflammation           | Activator | pro-inflammatory cytokine                                                                                                         | Hamid, Q. et al. (2009)                                 |
| TNF-a                    | iNOS                   | Activator | TNF-a and IFN-II induce production of iNOS (NOS2)                                                                                 | Karki, R. et al. (2021)                                 |
| TNF-a                    | T-cellInfiltration     | Activator | Speculative interaction based on inverse correlation                                                                              | Chen, Z. et al. (2020); Diao, B. (2020); Liu, J. (2020) |
| TPC2                     | ViralFusion            | Activator | TPC2 contributes to viral entry                                                                                                   | Ou, X. (2020)                                           |
| TRAF3                    | ASC                    | Activator | p3a promotes TRAF3-mediated ubiquitination of p105 and ASC (TRAF3 binding domain of ORF3a conserved from SARS-COV                 | Siu, K. et al. (2019); Issa, E. et al. (2020)           |
| TRAF3                    | p105                   | Activator | p3a promotes TRAF3-mediated ubiquitination of p105 and ASC (TRAF3 binding domain of ORF3a conserved from SARS-COV                 | Siu, K. et al. (2019); Issa, E. et al. (2020)           |
| TRAF3                    | TBK1                   | Activator | Cytosolic PRRs together with TRAF3 and TANK1 can induce IFN through TBK1                                                          | Mogensen, T. (2009)                                     |
| TRAF3                    | TLR3-TRIF              | Activator | TLR3/4 signalling using TRIF adaptor requires TRAF3,6 E3 ligases and adaptors TANK and RIP1                                       | Mogensen, T. (2009)                                     |
| TRAF6                    | TLR3-TRIF              | Activator | TLR3/4 signalling using TRIF adaptor requires TRAF3,6 E3 ligases and adaptors TANK and RIP1                                       | Mogensen, T. (2009)                                     |
| TRIF                     | TLR3-TRIF              | Activator | TLR3/4 signalling using TRIF adaptor requires TRAF3,6 E3 ligases and adaptors TANK and RIP1                                       | Mogensen, T. (2009)                                     |
| Tyk2                     | IFN-I_SG               | Activator | IFN-I response requires IFNAR, Tyk2, Jak1, STAT1/2 and IRF9                                                                       | Barrat, F. et al. (2019)                                |

| From                          | To                     | Type      | Explanation                                                                                                                   | Reference                                                        |
|-------------------------------|------------------------|-----------|-------------------------------------------------------------------------------------------------------------------------------|------------------------------------------------------------------|
| Tyk2                          | IFN-III_SG             | Activator | IFN-III response requires IFN-LR1, Tyk2, Jak1, STAT1/2 and IRF9                                                               | Wack, A. et al. (2015)                                           |
| U1_U2snRNAs                   | Splicing               | Activator | U1, U2 snRNAs are constituent parts of spliceosome.                                                                           | Matera, A. et al. (2014)                                         |
| ViralCap-dependentTranslation | E                      | Activator | structural proteins translated from viral sgRNAs via cap-dependent translation                                                | Nakagawa, K. et al. (2016)                                       |
| ViralCap-dependentTranslation | M                      | Activator | structural proteins translated from viral sgRNAs via cap-dependent translation                                                | Nakagawa, K. et al. (2016)                                       |
| ViralCap-dependentTranslation | N                      | Activator | translation                                                                                                                   | Nakagawa, K. et al. (2016)                                       |
| ViralCap-dependentTranslation | p3a                    | Activator | protein detected                                                                                                              | Davidson, A. (2020); Bouhaddou, M. (2020); Kim, D. et al. (2020) |
| ViralCap-dependentTranslation | p3b                    | Activator | protein detected                                                                                                              | Davidson, A. (2020)                                              |
| ViralCap-dependentTranslation | p6                     | Activator | protein detected                                                                                                              | Davidson, A. (2020); Kim, D. et al. (2020)                       |
| ViralCap-dependentTranslation | p7a                    | Activator | protein detected                                                                                                              | Davidson, A. (2020); Kim, D. et al. (2020)                       |
| ViralCap-dependentTranslation | p7b                    | Activator | protein detected                                                                                                              | Davidson, A. (2020)                                              |
| ViralCap-dependentTranslation | p8                     | Activator | protein detected                                                                                                              | Davidson, A. (2020); Bouhaddou, M. (2020); Kim, D. et al. (2020) |
| ViralCap-dependentTranslation | p9b                    | Activator | protein detected                                                                                                              | Bouhaddou, M. (2020); Davidson, A. (2020)                        |
| ViralCap-dependentTranslation | p9c                    | Activator | protein detected                                                                                                              | Bouhaddou, M. (2020)                                             |
| ViralCap-dependentTranslation | pp1a                   | Activator | pp1a and pp1ab translated directly from viral genome via cap-dependent translation                                            | Nakagawa, K. et al. (2016)                                       |
| ViralCap-dependentTranslation | pp1ab                  | Activator | pp1a and pp1ab translated directly from viral genome via cap-dependent translation                                            | Nakagawa, K. et al. (2016)                                       |
| ViralCap-dependentTranslation | S                      | Activator | structural proteins translated from viral sgRNAs via cap-dependent translation                                                | Nakagawa, K. et al. (2016)                                       |
| ViralEntry1                   | N                      | Activator | Viral genome enters cell packaged in N protein                                                                                |                                                                  |
| ViralEntry1                   | ViralGenome            | Activator | Fusion of viral and cellular membranes allows entry of viral proteins and RNA into the cell.                                  | Fehr, A. et al. (2015)                                           |
| ViralFusion                   | ViralEntry             | Activator | Fusion of viral and cellular membranes allows entry of viral proteins and RNA into the cell.                                  | Fehr, A. et al. (2015); Ou, X. (2020)                            |
| ViralFusion                   | ViralEntry1            | Activator | Fusion of viral and cellular membranes allows entry of viral proteins and RNA into the cell.                                  | Fehr, A. et al. (2015); Ou, X. (2020)                            |
| ViralGenome                   | CytosolicPRRs          | Activator | MDA5/RIG-1 act as PRRs that detects dsRNA eg from viral RNA replication                                                       |                                                                  |
| ViralGenome                   | OAS                    | Activator | OASs recognise dsRNA                                                                                                          | Lee, S. et al. (2020)                                            |
| ViralGenome                   | PKR                    | Activator | PKR is activated by dsRNA                                                                                                     | Schoggins, J. et al. (2011)                                      |
| ViralGenome                   | pp1a                   | Activator | pp1a and pp1ab translated directly from viral genome via cap-dependent translation                                            | Sa Ribero, M. et al. (2020)                                      |
| ViralGenome                   | pp1ab                  | Activator | pp1a and pp1ab translated directly from viral genome via cap-dependent translation                                            | Nakagawa, K. et al. (2016)                                       |
| ViralGenome                   | TLR3                   | Activator | TLR3 is activated by dsRNA (in endosome)                                                                                      | Nakagawa, K. et al. (2016)                                       |
| ViralGenome                   | ViralGenome            | Activator | Viral Genome replicated                                                                                                       | Mogensen, T. (2009)                                              |
| ViralGenome                   | ViralsgRNAs            | Activator | Viral sgRNAs transcribed by RTC from genome                                                                                   | Nakagawa, K. et al. (2016)                                       |
| ViralGenome                   | VirionERGIC            | Activator | Structural proteins form virion in endoplasmic reticulum-Golgi intermediate compartment (ERGIC)                               | Romano, M. et al. (2020); Kim, D. et al. (2020)                  |
| ViralGenomeDegradation        | VirionERGIC            | Inhibitor | Structural proteins form virion in endoplasmic reticulum-Golgi intermediate compartment (ERGIC)                               | Fehr, A. et al. (2015)                                           |
| ViralsgRNAs                   | CytosolicPRRs          | Activator | nsp15 EndoU activity cleaves polyUs from viral sgRNAs, preventing their recognition by MDA5.                                  | Fehr, A. et al. (2015)                                           |
| ViralsgRNAs                   | E                      | Activator | structural proteins translated from viral sgRNAs via cap-dependent translation                                                | Hackbart, M. et al. (2020)                                       |
| ViralsgRNAs                   | M                      | Activator | structural proteins translated from viral sgRNAs via cap-dependent translation                                                | Nakagawa, K. et al. (2016)                                       |
| ViralsgRNAs                   | N                      | Activator | structural proteins translated from viral sgRNAs via cap-dependent translation                                                | Nakagawa, K. et al. (2016)                                       |
| ViralsgRNAs                   | p3a                    | Activator | protein detected                                                                                                              | Davidson, A. (2020); Bouhaddou, M. (2020); Kim, D. et al. (2020) |
| ViralsgRNAs                   | p3b                    | Activator | protein detected                                                                                                              | Davidson, A. (2020)                                              |
| ViralsgRNAs                   | p6                     | Activator | protein detected                                                                                                              | Davidson, A. (2020); Kim, D. et al. (2020)                       |
| ViralsgRNAs                   | p7a                    | Activator | protein detected                                                                                                              | Davidson, A. (2020); Kim, D. et al. (2020)                       |
| ViralsgRNAs                   | p7b                    | Activator | protein detected                                                                                                              | Davidson, A. (2020)                                              |
| ViralsgRNAs                   | p8                     | Activator | protein detected                                                                                                              | Davidson, A. (2020); Bouhaddou, M. (2020); Kim, D. et al. (2020) |
| ViralsgRNAs                   | p9b                    | Activator | protein detected                                                                                                              | Bouhaddou, M. (2020); Davidson, A. (2020)                        |
| ViralsgRNAs                   | p9c                    | Activator | protein detected                                                                                                              | Bouhaddou, M. (2020)                                             |
| ViralsgRNAs                   | S                      | Activator | structural proteins translated from viral sgRNAs via cap-dependent translation                                                | Nakagawa, K. et al. (2016)                                       |
| Virion                        | ACE2-Spike             | Activator | The virus enters the cell through interaction of the spike protein with ACE2, spike complexes coat the outside of the virion. | Chen, Y. et al. (2020); Yao, H. (2020)                           |
| VirionERGIC                   | ViralReplication       | Activator | Virions in the ERGIC are transported to the cell surface and released through exocytosis                                      | Fehr, A. et al. (2015)                                           |
| XBP1                          | NF-kB                  | Activator | Xbp1 induces NF-kB expression                                                                                                 | Pathinayake, P. et al. (2018)                                    |
| ZAP                           | ViralGenomeDegradation | Activator | ISG ZAP restricts viral RNA                                                                                                   | Nchioua, R. et al. (2020)                                        |
| ZAP                           | ViralsgRNAs            | Inhibitor | ISG ZAP restricts viral RNA                                                                                                   | Nchioua, R. et al. (2020)                                        |

**Supplementary Table 1. Regulatory edges in the network model.** Each row shows a single edge, originating from the node in the "from" column and directed to the node in the "to" column. The table also contains details of the type of edge, a brief explanation of the mechanism of this regulation and a reference to the literature where required.



**Supplementary Table 2. Target functions used in the network model**

| Node                         | Target Function                                                                                                               | Explanation                                                                                                                                                                      | Reference                                                                                                                           |
|------------------------------|-------------------------------------------------------------------------------------------------------------------------------|----------------------------------------------------------------------------------------------------------------------------------------------------------------------------------|-------------------------------------------------------------------------------------------------------------------------------------|
| 3CLpro                       | max(var(pp1a),var(pp1ab)) + var(nsp5)                                                                                         | 3CL protease activity lies in nsp5, uncleaved pp1a and pp1ab also contain this domain                                                                                            | Fehr, A. et al. (2015)                                                                                                              |
| 40S                          | min(var(40S),var(eIF2))                                                                                                       | 2                                                                                                                                                                                |                                                                                                                                     |
| 43S                          | generic                                                                                                                       | 43S ribosomal subunit assembled from 40S subunit and multiple eIFs, including eIF2-GTP                                                                                           | Sonenberg, N. et al. (2009)                                                                                                         |
| 4E-BP                        | generic                                                                                                                       |                                                                                                                                                                                  |                                                                                                                                     |
| 60S                          | 1-(max(var(nsp8),var(nsp9)))                                                                                                  | 1                                                                                                                                                                                |                                                                                                                                     |
| 7SL                          | 1-(max(var(nsp8),var(nsp9)))                                                                                                  | 7SL bound by nsp8 and nsp9                                                                                                                                                       | Banerjee, A. (2020)                                                                                                                 |
| ACE1                         | generic                                                                                                                       | 1                                                                                                                                                                                |                                                                                                                                     |
| ACE2                         | 2-min(1,var(ADAM17))                                                                                                          | ACE2 shedding caused by ADAM17                                                                                                                                                   | Ingraham, N. (2020); Haga, S. (2008)                                                                                                |
| ACE2-Spike                   | var(ACE2)*var(Virion)                                                                                                         | Extracellular virions bind to ACE2 forming an ACE2-spike complex.                                                                                                                |                                                                                                                                     |
| ADAM17                       | 1+var(ROS)                                                                                                                    | ADAM17 activity increased by Nox4-dependent ROS production                                                                                                                       | Forrester, S. et al. (2016)                                                                                                         |
| Akt                          | generic                                                                                                                       |                                                                                                                                                                                  |                                                                                                                                     |
| Ang1-7                       | (1+var(ACE2)-max(1,var(ACE2-Spike))) * min(var(AngII),1)                                                                      | Interaction of ACE2 with spike prevents ACE2 enzymatic activity, converting AngII into Ang1-7                                                                                    | Alexandre, J. et al. (2020); Wang, S. et al. (2008)                                                                                 |
| AngII                        | generic                                                                                                                       |                                                                                                                                                                                  |                                                                                                                                     |
| Apoptosis                    | generic                                                                                                                       |                                                                                                                                                                                  |                                                                                                                                     |
| ASC                          | 1-min(var(p3a),var(traf3))                                                                                                    | p3a promotes TRAF3-mediated ubiquitination of ASC (TRAF3 binding domain of ORF3a conserved from SARS-COV)                                                                        | Siu, K. et al. (2019); Issa, E. et al. (2020)                                                                                       |
| AT1R                         | generic                                                                                                                       |                                                                                                                                                                                  |                                                                                                                                     |
| ATF6                         | var(40S)*var(60S)-min(1,var(nsp1))                                                                                            | Cap-independent translation relies on 40S and 60S ribosome subunits, nsp1 can inhibit host translation through interaction with 40S                                              | Walters, B. et al. (2016); Banerjee, A. (2020); Thoms, M. (2020); Schubert, K. et al. (2020)                                        |
| Cap-independentTranslation   | generic                                                                                                                       |                                                                                                                                                                                  |                                                                                                                                     |
| Caspase-1                    | generic                                                                                                                       |                                                                                                                                                                                  |                                                                                                                                     |
| Caspase-10                   | var(PANoptosome)+var(Caspase-8)+var(JNK)+var(p38) -var(NF-kB)-var(Akt)                                                        | Caspase-3 is the effector of apoptosis and integrates many signals                                                                                                               | Redza-Dutoir, M. et al. (2016); Song, G. et al. (2005); Lee, S. et al. (2020); Karki, R. et al. (2021)                              |
| Caspase-3                    | max(var(CytosolicPRRs), max(var(ND), max(var(p3a),var(PKR)))) * var(RIPK1)                                                    | Caspase-8 is involved with multiple forms of cell death and can respond to multiple signals, dependent on RIP1                                                                   | Mogensen, T. (2009); Gal-Ben-Ari, S. et al. (2018); Ren, Y. et al. (2020); Karki, R. et al. (2021)                                  |
| Caspase-8                    | generic                                                                                                                       |                                                                                                                                                                                  |                                                                                                                                     |
| CathepsinL                   | generic                                                                                                                       | 1                                                                                                                                                                                |                                                                                                                                     |
| CCL2                         | generic                                                                                                                       |                                                                                                                                                                                  |                                                                                                                                     |
| CellDeath                    | max(var(Apoptosis),max(var(Necroptosis),var(Pyroptosis)))                                                                     | Cell death can occur via apoptosis, pyroptosis or necroptosis                                                                                                                    |                                                                                                                                     |
| CH25H                        | floor((1+2*var(IFN-I_SG)) * (1+2*var(IFN-III_SG)))3                                                                           | CH25H is an type-III ISG                                                                                                                                                         | Zang, R. et al. (2020)                                                                                                              |
| CXCL10                       | generic                                                                                                                       |                                                                                                                                                                                  |                                                                                                                                     |
| CXCL11                       | generic                                                                                                                       |                                                                                                                                                                                  |                                                                                                                                     |
| CXCL9                        | generic                                                                                                                       |                                                                                                                                                                                  |                                                                                                                                     |
| CytosolicPRRs                | min(var(MAVS), min(var(MDA5), min(var(RIG-1), var(STING)))) * (max(var(ViralGenome),var(ViralsgRNAs))-var(nsp15)/2)           | MDA5/RIG-1 act as PRRs that detects dsRNA eg from viral RNA replication, nsp15 endonuclease helps viral sgRNAs to evade detection                                                | Lee, S. et al. (2020); Mogensen, T. (2009); Hackbart, M. et al. (2020)                                                              |
| DMVformation                 | min(var(nsp3),var(nsp4)+var(nsp6))/2                                                                                          | Double Membrane Vesicles are formed by nsp3, nsp4 and nsp6, these DMVs contain a pore consisting of a hexameric nsp3 complex. Precise requirements determined by Angelini et al. | Angelini, M. et al. (2013); Wolf, G. (2020)                                                                                         |
| E                            | var(ViralsgRNAs)*var(ViralCap-dependentTranslation)                                                                           | structural proteins translated from viral sgRNAs via cap-dependent translation                                                                                                   | Nakagawa, K. et al. (2016)                                                                                                          |
| EGFR                         | min(var(ADAM17),var(ROS))                                                                                                     | ADAM17 required for EGFR transactivation by ROS                                                                                                                                  | Forrester, S. (2018)                                                                                                                |
| eIF2                         | 2-min(1,max(var(PERK),var(PKR)))                                                                                              | phosphorylation of eIF2 prevents activation by its GEF eIF2B                                                                                                                     | Sonenberg, N. et al. (2009)                                                                                                         |
| eIF4A                        | generic                                                                                                                       |                                                                                                                                                                                  |                                                                                                                                     |
| eIF4B                        | generic                                                                                                                       |                                                                                                                                                                                  |                                                                                                                                     |
| eIF4E                        | 2-var(4E-BP)                                                                                                                  | 4E-BP binds eIF4E, preventing it from associating with eIF4F                                                                                                                     | Sonenberg, N. et al. (2009)                                                                                                         |
| eIF4F                        | min(var(eIF4A),min(var(eIF4E),var(eIF4G)))                                                                                    | eIF4F complex formed of eIF4A, E, G and others                                                                                                                                   | Sonenberg, N. et al. (2009)                                                                                                         |
| eIF4G                        | generic                                                                                                                       |                                                                                                                                                                                  |                                                                                                                                     |
| EndosomalpH                  | generic                                                                                                                       | 2                                                                                                                                                                                |                                                                                                                                     |
| ERK                          | max(var(S),max(var(EGFR),var(p3a)))                                                                                           | ER stress can be induced by S or p3a, or through EGFR transactivation                                                                                                            | Forrester, S. (2018); Zhang, X. et al. (2020); Hsu, A. et al. (2020)                                                                |
| ERstress                     | generic                                                                                                                       |                                                                                                                                                                                  |                                                                                                                                     |
| Fibrosis                     | generic                                                                                                                       | 1                                                                                                                                                                                |                                                                                                                                     |
| furin                        | generic                                                                                                                       |                                                                                                                                                                                  |                                                                                                                                     |
| GasderminD                   | generic                                                                                                                       |                                                                                                                                                                                  |                                                                                                                                     |
| GasderminE                   | generic                                                                                                                       |                                                                                                                                                                                  |                                                                                                                                     |
| glycosylation                | generic                                                                                                                       | 1                                                                                                                                                                                |                                                                                                                                     |
| guanylyltransferase          | min(var(43S),min(var(60S),var(eIF4F))-min(1,var(nsp1)))                                                                       | 2                                                                                                                                                                                |                                                                                                                                     |
| HostCap-dependentTranslation | generic                                                                                                                       | Cap-dependent translation requires 43S, 60S and eIF4F, nsp1 causes preferential translation of viral RNA                                                                         | Sonenberg, N. et al. (2009); Banerjee, A. (2020); Thoms, M. (2020); Schubert, K. et al. (2020)                                      |
| HostmRNAs                    | max(var(Cap-independentTranslation),var(HostCap-dependentTranslation))*var(HostmRNAs)/2                                       | Host protein synthesis depends on host mRNA and can proceed via cap-dependent or independent mechanisms                                                                          | Walters, B. et al. (2016)                                                                                                           |
| HostProteinSynthesis         | floor((1+2*var(IFN-I_SG)) * (1+2*var(IFN-III_SG)))3                                                                           | IFITM1-3 are ISGs.                                                                                                                                                               | Ribero, M. et al. (2020)                                                                                                            |
| IFITM                        | avg(var(IRF3),var(IRF7)) * (1+var(SRP))*var(HostProteinSynthesis) * (1+var(SensitivityOfIFNResponse))/5-avg(var(N),var(p8))/2 | IRF3 and IRF7 can induce IFN-I synthesis, SRP required for release, p8 and N can inhibit production                                                                              | Sa Ribero, M. et al. (2020); Barrat, F. et al. (2019); Li, J. et al. (2021)                                                         |
| IFN-I                        | var(IRF9)*var(Jak1)*min(var(STAT1),var(STAT2))*var(Tyk2)*var(IFNAR)*var(HostProteinSynthesis)/80                              | IFN-I response requires IFNAR, Tyk2, Jak1, STAT1/2 and IRF9                                                                                                                      | Barrat, F. et al. (2019)                                                                                                            |
| IFN-I_SG                     | var(ImmuneCells)*var(IL-18)/2                                                                                                 | IFN-gamma produced by various immune cells in response to IL-12 or IL-18                                                                                                         | Ivashkiv, L. (2018)                                                                                                                 |
| IFN-II_SG                    | var(Jak1)*var(Jak2)*var(STAT1)*var(IFNGR)*var(HostProteinSynthesis)/80                                                        | IFN-II response requires IFNGR, Jak2, Jak1, STAT1                                                                                                                                | Barrat, F. et al. (2019)                                                                                                            |
| IFN-III_SG                   | avg(var(IRF3),var(IRF7)) * (1+var(SRP))*var(HostProteinSynthesis) * (1+var(SensitivityOfIFNResponse))/5-avg(var(N),var(p8))/2 | IRF3 and IRF7 can induce IFN-I synthesis, SRP required for release, p8 and N can inhibit production                                                                              | Sa Ribero, M. et al. (2020); Barrat, F. et al. (2019); Li, J. et al. (2021)                                                         |
| IFN-III                      | var(IRF9)*var(Jak1)*min(var(STAT1),var(STAT2))*var(Tyk2)*var(IFN-III_SG)/80                                                   | IFN-III response requires IFN-III_SG, Tyk2, Jak1, STAT1/2 and IRF9                                                                                                               | Wack, A. et al. (2015)                                                                                                              |
| IFN-III_SG                   | generic                                                                                                                       |                                                                                                                                                                                  |                                                                                                                                     |
| IFN-LR1                      | generic                                                                                                                       |                                                                                                                                                                                  |                                                                                                                                     |
| IFNAR                        | generic                                                                                                                       |                                                                                                                                                                                  |                                                                                                                                     |
| IFNGR                        | generic                                                                                                                       |                                                                                                                                                                                  |                                                                                                                                     |
| IkBa                         | 2-var(IKK)                                                                                                                    | IKK inhibits IkBa through phosphorylation                                                                                                                                        | Liu, T. et al. (2017); Gal-Ben-Ari, S. et al. (2018)                                                                                |
| IKK                          | generic                                                                                                                       |                                                                                                                                                                                  |                                                                                                                                     |
| IL-10                        | generic                                                                                                                       |                                                                                                                                                                                  |                                                                                                                                     |
| IL-18                        | min(var(Caspase-1),var(NF-kB))                                                                                                | Pro-IL-18 production driven by NF-kB, cleaved into IL-18 by caspase-1                                                                                                            | Man, S. et al. (2017); Liu, T. et al. (2017)                                                                                        |
| IL-1B                        | max(1,var(Caspase-1))*var(NF-kB)/2                                                                                            | Pro-IL-1B production driven by NF-kB, cleaved into IL-1B by caspase-1, assume cleavage possible even at low levels of caspase activity                                           | Man, S. et al. (2017); Liu, T. et al. (2017)                                                                                        |
| IL-2                         | var(ImmuneCells)*var(NF-kB)/2                                                                                                 | IL-2 produced by immune cells in response to NF-kB                                                                                                                               | Liao, W. et al. (2013)                                                                                                              |
| IL-6                         | generic                                                                                                                       |                                                                                                                                                                                  |                                                                                                                                     |
| IL-8                         | generic                                                                                                                       |                                                                                                                                                                                  |                                                                                                                                     |
| ImmuneCells                  | input                                                                                                                         |                                                                                                                                                                                  |                                                                                                                                     |
| Inflammasome                 | (var(ASC)*var(NLRP3))-1                                                                                                       | ASC, NLRP3 and pro-caspase-1 form inflammasome leading to activation of Caspase-1                                                                                                | Lee, S. et al. (2020)                                                                                                               |
| Inflammation                 | (var(IL-1B)+var(IL-6)+var(IL-8)+var(TNF-a))/4-(var(IL-10)+var(IFN-II))/4                                                      | Inflammation is result of integration of several pro- and anti-inflammatory cytokines                                                                                            | Hamid, O. et al. (2009)                                                                                                             |
| INOS                         | min(var(HostProteinSynthesis),min(var(IFN-II_SG),var(TNF-a)))                                                                 | TNF-a and IFN-II induce production of iNOS (NOS2)                                                                                                                                | Karki, R. et al. (2021)                                                                                                             |
| IRE1                         | generic                                                                                                                       |                                                                                                                                                                                  |                                                                                                                                     |
| IRF3                         | var(TBK1)                                                                                                                     | IRF3 activity driven by TBK1 and inhibited by many viral proteins                                                                                                                | Mogensen, T. (2009); Yuen, C. et al. (2020); Xia, H. et al. (2020); Konno, Y. et al. (2020); Shin, D. (2020); Xia, H. et al. (2020) |
| IRF7                         | generic                                                                                                                       |                                                                                                                                                                                  |                                                                                                                                     |
| IRF9                         | generic                                                                                                                       |                                                                                                                                                                                  |                                                                                                                                     |
| Jak1                         | generic                                                                                                                       | 1                                                                                                                                                                                |                                                                                                                                     |
| Jak2                         | generic                                                                                                                       | 1                                                                                                                                                                                |                                                                                                                                     |
| JNK                          | generic                                                                                                                       |                                                                                                                                                                                  |                                                                                                                                     |
| LY6E                         | floor((1+2*var(IFN-I_SG)) * (1+2*var(IFN-III_SG)))3                                                                           | LY6E is an ISG                                                                                                                                                                   | Sa Ribero, M. et al. (2020)                                                                                                         |
| M                            | var(ViralsgRNAs)*var(ViralCap-dependentTranslation)                                                                           | structural proteins translated from viral sgRNAs via cap-dependent translation                                                                                                   | Nakagawa, K. et al. (2016)                                                                                                          |
| MasR                         | generic                                                                                                                       |                                                                                                                                                                                  |                                                                                                                                     |
| MAVS                         | generic                                                                                                                       | 1                                                                                                                                                                                |                                                                                                                                     |
| MDA5                         | generic                                                                                                                       | 1                                                                                                                                                                                |                                                                                                                                     |
| MLKL                         | generic                                                                                                                       |                                                                                                                                                                                  |                                                                                                                                     |
| mTORC1                       | generic                                                                                                                       |                                                                                                                                                                                  |                                                                                                                                     |
| N                            | var(ViralEntry1) + var(ViralsgRNAs)*var(ViralCap-dependentTranslation)                                                        | structural proteins translated from viral sgRNAs via cap-dependent translation                                                                                                   | Nakagawa, K. et al. (2016)                                                                                                          |
| Necroptosis                  | generic                                                                                                                       |                                                                                                                                                                                  |                                                                                                                                     |
| NF-kB                        | var(p105)*(max(1,var(XBP1)))*(1+var(IFN-I_SG)/2)/4-var(IkBa)/2                                                                | p105 is a constituent protein of the NF-kB complex, NF-kB activity is stimulated by XBP1 and the IFN-I pathway and is regulated by its inhibitor IkBa                            | Liu, T. et al. (2017); Hayden, M. et al. (2014); Pathinayake, P. et al. (2018); Gontzka, M. et al. (2014)                           |
| NKRF                         | generic                                                                                                                       |                                                                                                                                                                                  |                                                                                                                                     |
| NLRP3                        | generic                                                                                                                       | 1                                                                                                                                                                                |                                                                                                                                     |
| NO                           | generic                                                                                                                       |                                                                                                                                                                                  |                                                                                                                                     |
| Nox4                         | generic                                                                                                                       |                                                                                                                                                                                  |                                                                                                                                     |
| nsp1                         | var(nsp1_nsp2_nsp3_nsp4)*var(PLpro)                                                                                           | nsp1-4 is cleaved into individual proteins by PLpro                                                                                                                              | Fehr, A. et al. (2015)                                                                                                              |
| nsp1_nsp2_nsp3_nsp4          | max(var(pp1a),var(pp1ab))*var(3CLpro)                                                                                         | pp1a is cleaved into a single nsp1-4 and then all nsp5 to 11 by 3CLpro, pp1ab is cleaved into a single nsp1-4 and then all nsp5 to 16 by 3CLpro (nsp11 becomes nsp12 in pp1ab)   | Fehr, A. et al. (2015)                                                                                                              |
| nsp10                        | max(var(pp1a),var(pp1ab))*var(3CLpro)                                                                                         | pp1a is cleaved into a single nsp1-4 and then all nsp5 to 11 by 3CLpro, pp1ab is cleaved into a single nsp1-4 and then all nsp5 to 16 by 3CLpro (nsp11 becomes nsp12 in pp1ab)   | Fehr, A. et al. (2015)                                                                                                              |
| nsp10-nsp14                  | generic                                                                                                                       |                                                                                                                                                                                  |                                                                                                                                     |
| nsp10-nsp16                  | min(var(nsp10),var(nsp16))                                                                                                    | nsp10 and nsp16 form a complex                                                                                                                                                   | Bouvet, M. et al. (2010); Viswanathan, T. (2020)                                                                                    |

| Node                          | Target Function                                                                                                                                                                          | Explanation                                                                                                                                                                    | Reference                                                                                      |
|-------------------------------|------------------------------------------------------------------------------------------------------------------------------------------------------------------------------------------|--------------------------------------------------------------------------------------------------------------------------------------------------------------------------------|------------------------------------------------------------------------------------------------|
| nsp11                         | var(pp1a)*var(3CLpro)                                                                                                                                                                    | pp1a is cleaved into a single nsp1-4 and then all nsp5 to 11 by 3CLpro, pp1ab is cleaved into a single nsp1-4 and then all nsp5 to 16 by 3CLpro (nsp11 becomes nsp12 in pp1ab) | Fehr, A. et al. (2015)                                                                         |
| nsp12                         | var(pp1ab)*var(3CLpro)                                                                                                                                                                   | pp1a is cleaved into a single nsp1-4 and then all nsp5 to 11 by 3CLpro, pp1ab is cleaved into a single nsp1-4 and then all nsp5 to 16 by 3CLpro (nsp11 becomes nsp12 in pp1ab) | Fehr, A. et al. (2015)                                                                         |
| nsp12-nsp7-nsp8               | min(var(nsp12),min(var(nsp7),var(nsp8)))                                                                                                                                                 | Complex formed of nsp12-nsp7-nsp8 required for RdRp activity.                                                                                                                  | Subissi, L. (2014); Kirchoefer, R. et al. (2019); Chen, J. (2020)                              |
| nsp13                         | var(pp1ab)*var(3CLpro)                                                                                                                                                                   | pp1a is cleaved into a single nsp1-4 and then all nsp5 to 11 by 3CLpro, pp1ab is cleaved into a single nsp1-4 and then all nsp5 to 16 by 3CLpro (nsp11 becomes nsp12 in pp1ab) | Fehr, A. et al. (2015)                                                                         |
| nsp14                         | var(pp1ab)*var(3CLpro)                                                                                                                                                                   | pp1a is cleaved into a single nsp1-4 and then all nsp5 to 11 by 3CLpro, pp1ab is cleaved into a single nsp1-4 and then all nsp5 to 16 by 3CLpro (nsp11 becomes nsp12 in pp1ab) | Fehr, A. et al. (2015)                                                                         |
| nsp15                         | var(pp1ab)*var(3CLpro)                                                                                                                                                                   | pp1a is cleaved into a single nsp1-4 and then all nsp5 to 11 by 3CLpro, pp1ab is cleaved into a single nsp1-4 and then all nsp5 to 16 by 3CLpro (nsp11 becomes nsp12 in pp1ab) | Fehr, A. et al. (2015)                                                                         |
| nsp16                         | var(nsp1_nsp2_nsp3_nsp4)*var(PLpro)                                                                                                                                                      | nsp1-4 is cleaved into individual proteins by PLpro                                                                                                                            | Fehr, A. et al. (2015)                                                                         |
| nsp2                          | var(nsp1_nsp2_nsp3_nsp4)*var(PLpro)                                                                                                                                                      | nsp1-4 is cleaved into individual proteins by PLpro                                                                                                                            | Fehr, A. et al. (2015)                                                                         |
| nsp3                          | var(nsp1_nsp2_nsp3_nsp4)*var(PLpro)                                                                                                                                                      | nsp1-4 is cleaved into individual proteins by PLpro                                                                                                                            | Fehr, A. et al. (2015)                                                                         |
| nsp4                          | max(var(pp1a),var(pp1ab))*var(3CLpro)                                                                                                                                                    | pp1a is cleaved into a single nsp1-4 and then all nsp5 to 11 by 3CLpro, pp1ab is cleaved into a single nsp1-4 and then all nsp5 to 16 by 3CLpro (nsp11 becomes nsp12 in pp1ab) | Fehr, A. et al. (2015)                                                                         |
| nsp5                          | max(var(pp1a),var(pp1ab))*var(3CLpro)                                                                                                                                                    | pp1a is cleaved into a single nsp1-4 and then all nsp5 to 11 by 3CLpro, pp1ab is cleaved into a single nsp1-4 and then all nsp5 to 16 by 3CLpro (nsp11 becomes nsp12 in pp1ab) | Fehr, A. et al. (2015)                                                                         |
| nsp6                          | max(var(pp1a),var(pp1ab))*var(3CLpro)                                                                                                                                                    | pp1a is cleaved into a single nsp1-4 and then all nsp5 to 11 by 3CLpro, pp1ab is cleaved into a single nsp1-4 and then all nsp5 to 16 by 3CLpro (nsp11 becomes nsp12 in pp1ab) | Fehr, A. et al. (2015)                                                                         |
| nsp7                          | generic                                                                                                                                                                                  |                                                                                                                                                                                |                                                                                                |
| nsp8                          | generic                                                                                                                                                                                  |                                                                                                                                                                                |                                                                                                |
| nsp9                          | generic                                                                                                                                                                                  |                                                                                                                                                                                |                                                                                                |
| OAS                           | floor((1+2*var(IFN-I_SG))*(1+2*var(IFN-III_SG))/3)*min(var(ViralGenome),1)                                                                                                               | OAS is an ISG, activated by dsRNA                                                                                                                                              | Schoggins, J. et al. (2011)                                                                    |
| p105                          | generic                                                                                                                                                                                  |                                                                                                                                                                                |                                                                                                |
| p38                           | max(var(TAK1),var(AT1R)-var(MasR))                                                                                                                                                       | AT1R and MasR have opposing effects on p38 activation, TAK1 promotes MAPK activity through phosphorylation of MKK proteins                                                     | Forrester, S. (2018); Mogensen, T. (2009)                                                      |
| p3a                           | min(var(ViralsgRNAs),var(ViralCap-dependentTranslation))                                                                                                                                 | accessory proteins translated from viral sgRNAs via cap-dependent translation                                                                                                  | Nakagawa, K. et al. (2016)                                                                     |
| p3b                           | min(var(ViralsgRNAs),var(ViralCap-dependentTranslation))                                                                                                                                 | accessory proteins translated from viral sgRNAs via cap-dependent translation                                                                                                  | Nakagawa, K. et al. (2016)                                                                     |
| p6                            | min(var(ViralsgRNAs),var(ViralCap-dependentTranslation))                                                                                                                                 | accessory proteins translated from viral sgRNAs via cap-dependent translation                                                                                                  | Nakagawa, K. et al. (2016)                                                                     |
| p7a                           | min(var(ViralsgRNAs),var(ViralCap-dependentTranslation))                                                                                                                                 | accessory proteins translated from viral sgRNAs via cap-dependent translation                                                                                                  | Nakagawa, K. et al. (2016)                                                                     |
| p7b                           | min(var(ViralsgRNAs),var(ViralCap-dependentTranslation))                                                                                                                                 | accessory proteins translated from viral sgRNAs via cap-dependent translation                                                                                                  | Nakagawa, K. et al. (2016)                                                                     |
| p8                            | min(var(ViralsgRNAs),var(ViralCap-dependentTranslation))                                                                                                                                 | accessory proteins translated from viral sgRNAs via cap-dependent translation                                                                                                  | Nakagawa, K. et al. (2016)                                                                     |
| p9b                           | min(var(ViralsgRNAs),var(ViralCap-dependentTranslation))                                                                                                                                 | accessory proteins translated from viral sgRNAs via cap-dependent translation                                                                                                  | Nakagawa, K. et al. (2016)                                                                     |
| p9c                           | min(var(ViralsgRNAs),var(ViralCap-dependentTranslation))                                                                                                                                 | accessory proteins translated from viral sgRNAs via cap-dependent translation                                                                                                  | Nakagawa, K. et al. (2016)                                                                     |
| PANoptosome                   | var(ASC)*var(Caspase-8)*var(NLRP3)*var(RIPK1)                                                                                                                                            | PANoptosome formed from Caspase-8, NLRP3, ASC, RIPK1 as well as RIPK3 and FADD                                                                                                 | Christgen, S. et al. (2020)                                                                    |
| PERK                          | min(1,var(ERstress))                                                                                                                                                                     | AngIIAT1R induces PERK activity through ER stress                                                                                                                              | Forrester, S. (2018)                                                                           |
| PK3K                          | generic                                                                                                                                                                                  |                                                                                                                                                                                |                                                                                                |
| PKfyve                        | generic                                                                                                                                                                                  |                                                                                                                                                                                |                                                                                                |
| PKC                           | generic                                                                                                                                                                                  |                                                                                                                                                                                |                                                                                                |
| PKR                           | floor((1+2*var(IFN-I_SG))*(1+2*var(IFN-III_SG))/3)*min(var(ViralGenome),1)                                                                                                               | PKR is an ISG and is activated by dsRNA                                                                                                                                        | Sa Ribero, M. et al. (2020)                                                                    |
| PLpro                         | max(var(pp1a),var(pp1ab)) + var(nsp3)                                                                                                                                                    | PL protease activity lies in nsp3, uncleaved pp1a and pp1ab also contain this domain                                                                                           | Fehr, A. et al. (2015)                                                                         |
| pp1a                          | min(var(ViralGenome),var(ViralCap-dependentTranslation))                                                                                                                                 | pp1a and pp1ab translated directly from viral genome via cap-dependent translation                                                                                             | Nakagawa, K. et al. (2016)                                                                     |
| pp1ab                         | min(var(ViralGenome),var(ViralCap-dependentTranslation))                                                                                                                                 | pp1a and pp1ab translated directly from viral genome via cap-dependent translation                                                                                             | Nakagawa, K. et al. (2016)                                                                     |
| Pyroptosis                    | var(GasderminE)+var(GasderminD)                                                                                                                                                          | Caspase-1 drives pyroptosis through cleavage of Gasdermin E, PANoptosome induces pyroptosis through cleavage of Gasdermin E                                                    | Man, S. et al. (2017)                                                                          |
| RIG-1                         | 1                                                                                                                                                                                        |                                                                                                                                                                                |                                                                                                |
| RIPK1                         | 1                                                                                                                                                                                        |                                                                                                                                                                                |                                                                                                |
| RNAseL                        | generic                                                                                                                                                                                  |                                                                                                                                                                                |                                                                                                |
| ROCK                          | min(var(PKC),var(ROS))                                                                                                                                                                   | AngII induced fibrosis mediated by ROS and ROCK, PKC activity required for AngIIAT1R induced RhoA/ROCK activity                                                                | Forrester, S. (2018); Kondrikov, D. et al. (2011)                                              |
| ROS                           | generic                                                                                                                                                                                  |                                                                                                                                                                                |                                                                                                |
| S                             | var(ViralsgRNAs)*var(ViralCap-dependentTranslation)*var(furin)*var(glycosylation)                                                                                                        | structural proteins translated from viral sgRNAs via cap-dependent translation, S processed by furin cleavage and glycosylation                                                | Nakagawa, K. et al. (2016); Yang, Q. et al. (2020); Shang, J. et al. (2020)                    |
| S6K                           | generic                                                                                                                                                                                  |                                                                                                                                                                                |                                                                                                |
| SensitivityOIFNResponse       | input                                                                                                                                                                                    |                                                                                                                                                                                |                                                                                                |
| Splicing                      | generic                                                                                                                                                                                  |                                                                                                                                                                                |                                                                                                |
| SRP                           | generic                                                                                                                                                                                  |                                                                                                                                                                                |                                                                                                |
| STAT1                         | 2*max(var(p6),max(var(M),max(var(nsp1),max(var(nsp13),max(var(nsp6),var(p7b)))))))/2                                                                                                     | nsp1, nsp6, nsp13, p3a, M, p7b and p6 inhibit STAT1 phosphorylation or nuclear localization                                                                                    | Xia, H. et al. (2020); Miorin, L. (2020); Lei, X. et al. (2020); Li, J. et al. (2021)          |
| STAT2                         | 2*max(var(p6),max(var(nsp13),max(var(nsp6),max(var(p7a),var(p7b)))))/2                                                                                                                   | nsp6, nsp13, p7a, p7b and p6 inhibit STAT2 phosphorylation or nuclear localization                                                                                             | Xia, H. et al. (2020); Miorin, L. (2020); Lei, X. et al. (2020); Li, J. et al. (2021)          |
| STING                         | 1                                                                                                                                                                                        |                                                                                                                                                                                |                                                                                                |
| SyncytiaFormation             | min(1,var(S))*(1+min(1,var(TMPPRSS2))) - var(IFITM)                                                                                                                                      | S protein induces syncytia formation, IFITM (mainly IFITM1) prevents formation but only in absence of TMPPRSS2                                                                 | Buchrieser, J. et al. (2020)                                                                   |
| T-cellinfiltration            | var(IL-10)*var(IL-6)*var(TNF-a)                                                                                                                                                          | These cytokines inversely correlated with T-cell numbers                                                                                                                       | Chen, Z. et al. (2020); Dia0, B. (2020); Liu, J. (2020)                                        |
| TAK1                          | generic                                                                                                                                                                                  |                                                                                                                                                                                |                                                                                                |
| TANK                          | 1                                                                                                                                                                                        |                                                                                                                                                                                |                                                                                                |
| TBK1                          | avg(var(traf3),var(TANK))*var(CytosolicPRR)+var(TLR3-TRIF)                                                                                                                               | Cytosolic PRRs together with TRAF3 and TANK1 or TLR3-TRIF can induce IFN through TBK1                                                                                          | Mogensen, T. (2009)                                                                            |
| TLR3                          | generic                                                                                                                                                                                  |                                                                                                                                                                                |                                                                                                |
| TLR3-TRIF                     | min(var(RIPK1), min(var(TANK), min(var(TLR3), min(var(traf3), min(var(traf6),var(TRIF))))))                                                                                              | TLR3 signalling using TRIF adaptor requires TRAF3.6 E3 ligases and adaptors TANK and RIP1                                                                                      | Mogensen, T. (2009)                                                                            |
| TMPPRSS2                      | 1                                                                                                                                                                                        |                                                                                                                                                                                |                                                                                                |
| TNF-a                         | avg(var(IFN-II),var(IL-1B),var(IL-2),var(NF-kB))*var(ImmuneCells)                                                                                                                        | TNF-a produced by a range of immune cells in response to many stimuli including IFN-II, IL-1 and IL-2 and NF-kB                                                                | Falvo, J. et al. (2010)                                                                        |
| TPC2                          | generic                                                                                                                                                                                  |                                                                                                                                                                                |                                                                                                |
| TRAF3                         | 1                                                                                                                                                                                        |                                                                                                                                                                                |                                                                                                |
| TRAF6                         | 1                                                                                                                                                                                        |                                                                                                                                                                                |                                                                                                |
| TRIF                          | 1                                                                                                                                                                                        |                                                                                                                                                                                |                                                                                                |
| Tyk2                          | 1                                                                                                                                                                                        |                                                                                                                                                                                |                                                                                                |
| U1_U2snRNAs                   | 2*min(1,var(nsp16))                                                                                                                                                                      | nsp16 binds U1/U2 snRNAs inhibiting splicing                                                                                                                                   | Banerjee, A. (2020)                                                                            |
| ViralCap-dependentTranslation | min(var(43S),min(var(60S),var(eIF4F)))*max(1,var(nsp1))                                                                                                                                  | Cap-dependent translation requires 43S, 60S and eIF4F, nsp1 causes preferential translation of viral RNA                                                                       | Sonenberg, N. et al. (2009); Banerjee, A. (2020); Thoms, M. (2020); Schubert, K. et al. (2020) |
| ViralEntry                    | var(ViralFusion)-var(LY6E)+var(CH25H)/2                                                                                                                                                  | Viral entry inhibited by LY6E and CH25H                                                                                                                                        | Vabret, N. (2020); Zang, R. et al. (2020); Pfaender, S. (2020); Zhao, X. et al. (2020)         |
| ViralEntry1                   | var(ViralFusion)                                                                                                                                                                         | Assume initial entry of virus uninhibited to allow analysis of stable state                                                                                                    |                                                                                                |
| ViralFusion                   | (min(var(TMPPRSS2),var(CathepsinL)) + min(var(CathepsinL),var(TPC2))) + min(var(TMPPRSS2),var(TPC2))*min(1,var(ACE2-Spike))*(1+min(1,var(EndosomalpH)))/4                                | Successful entry of the virion requires engagement of the virion with ACE2 and 2 of 3 proteases, low endosomal pH required for viral fusion by endocytosis.                    | Fehr, A. et al. (2015); Shang, J. et al. (2020); Hoffmann, M. (2020); Ou, X. (2020)            |
| ViralGenome                   | min(1,var(ViralEntry1)),min(var(DMFormation)),min(var(N),min(var(PLpro),min(var(nsp10-nsp14),min(var(nsp12-nsp7-nsp8),min(var(nsp13),var(ViralGenome))))))                               | Viral entry introduces viral genome, then replicated using viral RdRp machinery in DMVs                                                                                        | Fehr, A. et al. (2015); Cong, Y. (2020); Chen, J. (2020);                                      |
| ViralGenomeDegradation        | (var(ZAP)+var(RNAseL))/2                                                                                                                                                                 | Degradation of the viral genome by cellular restriction factors ZAP and RNAseL will prevent spread of virus                                                                    | Snijder, E. (2020) Schoggins, J. et al. (2011); Nchioua, R. et al. (2020)                      |
| ViralReplication              | generic                                                                                                                                                                                  |                                                                                                                                                                                |                                                                                                |
| ViralsgRNAs                   | min(var(ViralGenome),min(var(DMFormation)),min(2*cell(var(N))/2),min(var(PLpro),min(var(nsp10-nsp16),min(var(nsp12-nsp7-nsp8),min(var(nsp14),min(var(guanlyltransferase),var(nsp13)))))) | Viral sgRNAs transcribed by RTC from genome, nsp14 functions as N7-MTase, ensuring viral mRNAs are correctly capped, sgRNAs restricted by ZAP                                  | Romano, M. et al. (2020); Ogando, N. et al. (2020); Nchioua, R. et al. (2020)                  |
| Virion                        | input                                                                                                                                                                                    |                                                                                                                                                                                |                                                                                                |
| VirionERGIC                   | min(var(E),min(var(M),min(var(N),min(var(S),var(ViralGenome)-var(ViralGenomeDegradation))))                                                                                              | Structural proteins form virion in endoplasmic reticulum-Golgi intermediate compartment (ERGIC)                                                                                | Fehr, A. et al. (2015)                                                                         |
| XBP1                          | generic                                                                                                                                                                                  |                                                                                                                                                                                |                                                                                                |
| ZAP                           | floor((1+2*var(IFN-I_SG))*(1+2*var(IFN-III_SG))/3)                                                                                                                                       | ZAP is an ISG                                                                                                                                                                  | Nchioua, R. et al. (2020)                                                                      |

Supplementary Table 2. Target functions used in the network model. The target function for each node is specified, along with a brief description of the mechanism and a reference where required.

### Supplementary Table 3. Constraints for each state of the network model

| Background                   | Node                        | Activity |
|------------------------------|-----------------------------|----------|
| Uninfected                   | Virion                      | 0        |
|                              | ImmuneCells                 | 1        |
|                              | Sensitivity of IFN Response | 0        |
| Mild COVID-19                | Virion                      | 1        |
|                              | ImmuneCells                 | 1        |
|                              | Sensitivity of IFN Response | 1        |
| Early Stage, Severe COVID-19 | Virion                      | 1        |
|                              | ImmuneCells                 | 1        |
|                              | Sensitivity of IFN Response | 0        |
| Late Stage, Severe COVID-19  | Virion                      | 1        |
|                              | ImmuneCells                 | 1        |
|                              | Sensitivity of IFN Response | 2        |
|                              | ViralGenome                 | 2        |

**Supplementary Table 3. Constraints applied for each state of the network model.** For each model state, the constrained nodes and their value are given.

**Supplementary Table 4. Experiments from the literature used to validate the network model**

| Paper                      | Cell Line                        | Experiment                                                                    | Constraints                                                             | Expected Results                                          | Model Result                                              |
|----------------------------|----------------------------------|-------------------------------------------------------------------------------|-------------------------------------------------------------------------|-----------------------------------------------------------|-----------------------------------------------------------|
| Hoffman et al. (2020)      | E6 Vero (TMPRSS2+)               | Background for all experiments                                                | Immune Cells OFF, Sensitivity of IFN Response Low, all other inputs ON  |                                                           |                                                           |
|                            |                                  | Control                                                                       | Virion OFF                                                              | Viral Entry OFF                                           | Viral Entry OFF                                           |
| Ou et al. (2020)           | HEK-293T (ACE2+)                 | Untreated                                                                     | Virion ON                                                               | Viral Entry High                                          | Viral Entry High                                          |
|                            |                                  | Cathepsin inhibitor (E-64d)                                                   | Virion ON, CathepsinL OFF                                               | Viral Entry Low                                           | Viral Entry Low                                           |
| Buchrieser et al. (2020)   | U2-OS (ACE2+)                    | Control                                                                       | Virion ON, TMPRSS2 OFF                                                  | Viral Entry Low                                           | Viral Entry Low                                           |
|                            |                                  | Background for all experiments                                                | Immune Cells OFF, Sensitivity of IFN Response Low, all other inputs ON  |                                                           |                                                           |
| Choy et al. (2020)         | E6 Vero                          | Control                                                                       | Virion ON, TMPRSS2 OFF                                                  | Viral Replication High                                    | Viral Replication High                                    |
|                            |                                  | Redemsvir                                                                     | Virion ON, TMPRSS2 OFF, nsp12 OFF                                       | Viral Replication OFF                                     | Viral Replication OFF                                     |
| Wang et al. (2020a)        | E6 Vero                          | Control                                                                       | Virion ON, TMPRSS2 OFF                                                  | Viral Replication High                                    | Viral Replication High                                    |
|                            |                                  | Homoharringtonine                                                             | Virion ON, TMPRSS2 OFF, 60S OFF                                         | Viral Replication OFF                                     | Viral Replication OFF                                     |
| Gordon et al. (2020)       | E6 Vero                          | Control                                                                       | Virion ON, TMPRSS2 OFF                                                  | Viral Replication High                                    | Viral Replication High                                    |
|                            |                                  | Arbidol                                                                       | Virion ON, TMPRSS2 OFF, SCLero OFF                                      | Viral Replication OFF                                     | Viral Replication OFF                                     |
| Wang et al. (2020b)        | E6 Vero                          | Control                                                                       | Virion ON, TMPRSS2 OFF                                                  | Viral Replication High                                    | Viral Replication High                                    |
|                            |                                  | Zalattin (eIF4A inhibitor)                                                    | Virion ON, TMPRSS2 OFF, eIF4A OFF                                       | Viral Replication OFF                                     | Viral Replication OFF                                     |
| Shin et al. (2020)         | Caco-2                           | Control                                                                       | Virion ON, TMPRSS2 OFF                                                  | Viral Replication High                                    | Viral Replication High                                    |
|                            |                                  | GRL-0617 (PLpro inhibitor)                                                    | Virion ON, PLpro OFF                                                    | Viral Replication OFF                                     | Viral Replication OFF                                     |
| Ren et al. (2020)          | E6 Vero                          | Control                                                                       | Virion ON, TMPRSS2 OFF                                                  | Viral Replication High                                    | Viral Replication High                                    |
|                            |                                  | ORF3a expression                                                              | Virion OFF, TMPRSS2 OFF, p3a ON                                         | Apoptosis High                                            | Apoptosis High                                            |
| Lokugamage et al. (2020)   | Calu-3                           | Control                                                                       | Virion ON, Sensitivity of IFN Response Low, IFN-II High                 | Replication Mid                                           | Replication Mid                                           |
|                            |                                  | IFN-I treatment                                                               | Virion ON, Sensitivity of IFN Response Mid, IFN-I High                  | Replication OFF                                           | Replication OFF                                           |
| Vanderheiden et al. (2020) | Human airway epithelial cultures | Control                                                                       | Virion ON, Sensitivity of IFN Response Mid, IFN-I High, Immune Cells ON | Replication OFF                                           | Replication Low                                           |
|                            |                                  | Infected                                                                      | Virion ON, Immune Cells ON                                              | Replication High                                          | Replication High                                          |
| Nichous et al. (2020)      | Calu-3                           | Control                                                                       | Virion ON, Sensitivity of IFN Response Low, IFN-II High                 | Replication Mid                                           | Replication Mid                                           |
|                            |                                  | IFN-I treatment                                                               | Virion ON, Sensitivity of IFN Response Low, IFN-II High, ZAP OFF        | Viral Replication Low, Viral Entry Mid                    | Viral Replication Low, Viral Entry Mid                    |
| Zhang et al. (2020)        | A549                             | Control                                                                       | Virion OFF                                                              | ER Stress OFF                                             | ER Stress OFF                                             |
|                            |                                  | Infected                                                                      | Virion ON                                                               | ER Stress High                                            | ER Stress High                                            |
| Hsu et al. (2020)          | BCI-NS1.1                        | Control                                                                       | Virion OFF, p3a ON                                                      | ER Stress High, IFN-I Low, IL-6 Low, IL-1B Low, TNF-a Low | ER Stress High, IFN-I OFF, IL-6 Low, IL-1B Low, TNF-a OFF |
|                            |                                  | S treatment                                                                   | Virion OFF, S ON                                                        | ER Stress High, IL-6 Low, IL-1B Low, TNF-a Low, CCL2 Low  | ER Stress High, IL-6 Low, IL-1B Low, TNF-a OFF, CCL2 Low  |
| Miorin et al. (2020)       | HEK293T                          | Control                                                                       | Virion OFF, IFN-I High                                                  | IFN-I, SG High                                            | IFN-I, SG High                                            |
|                            |                                  | ISG assay control                                                             | Virion OFF, IFN-I High, p6 High                                         | IFN-I, SG Mid                                             | IFN-I, SG Mid                                             |
| Banerjee et al. (2020)     | HEK293T                          | Control                                                                       | Virion OFF, IFN-I High                                                  | IFN-I, SG Mid                                             | IFN-I, SG Mid                                             |
|                            |                                  | ISG assay, Nsp16 expression                                                   | Virion OFF, IFN-I High, Nsp16 High                                      | IFN-I, SG High                                            | IFN-I, SG High                                            |
| Xia et al. (2020)          | HEK293T                          | Control                                                                       | Virion OFF, IFN-I High                                                  | IFN-I, SG Mid                                             | IFN-I, SG Mid                                             |
|                            |                                  | ISG assay, Nsp8+Nsp9 expression                                               | Virion OFF, IFN-I High, Nsp8 High, Nsp9 High                            | IFN-I, SG High                                            | IFN-I, SG High                                            |
| Uhal et al. (2020)         | MLE-12                           | Control                                                                       | Virion OFF, AngII High                                                  | Apoptosis Low                                             | Apoptosis Low                                             |
|                            |                                  | ACE2 inhibitor (DX600), uninfected                                            | Virion OFF, ACE2 OFF                                                    | Apoptosis Low                                             | Apoptosis Low                                             |
| Meng et al. (2015)         | Rat primary lung fibroblast      | Control, collagen assay, uninfected                                           | Virion OFF                                                              | Fibrosis OFF                                              | Fibrosis OFF                                              |
|                            |                                  | AngII treatment, collagen + ROS assay, uninfected                             | Virion OFF, AngII High                                                  | Fibrosis ON, ROS ON                                       | Fibrosis ON, ROS ON                                       |
| Karki et al. (2021)        | Bone Marrow Derived Macrophages  | Control                                                                       | Virion OFF, AngII High, Nox4 OFF                                        | Fibrosis OFF, ROS OFF                                     | Fibrosis OFF, ROS OFF                                     |
|                            |                                  | AngII treatment + NAC (ROS scavenger), collagen assay, uninfected             | Virion OFF, AngII High, ROS OFF                                         | Fibrosis OFF                                              | Fibrosis OFF                                              |
| Thome et al. (2021)        | Calu-3                           | Control                                                                       | Virion OFF, AngII High, Ang1-7 High                                     | Fibrosis OFF                                              | Fibrosis OFF                                              |
|                            |                                  | AngII + Ang1-7 treatment + A779 (MasR antagonist), collagen assay, uninfected | Virion OFF, AngII High, Ang1-7 High, MasR OFF                           | Fibrosis ON                                               | Fibrosis ON                                               |
| Hoffman et al. (2020)      | E6 Vero (TMPRSS2+)               | Control                                                                       | Virion OFF, AngII High, ACE2 High                                       | Fibrosis OFF                                              | Fibrosis OFF                                              |
|                            |                                  | AngII treatment + ACE2 overexpression, collagen, uninfected                   | Virion OFF, AngII High, ACE2 High                                       | Cell Death OFF                                            | Cell Death OFF                                            |
| Karki et al. (2021)        | Bone Marrow Derived Macrophages  | Control                                                                       | Virion OFF, TNF-a High, IFN-II High                                     | Cell Death High                                           | Cell Death High                                           |
|                            |                                  | TNF-a + IFN-II treatment                                                      | Virion OFF, TNF-a High, IFN-II High                                     | Cell Death OFF                                            | Cell Death OFF                                            |
| Thome et al. (2021)        | Calu-3                           | Control                                                                       | Virion OFF, TNF-a High, IFN-I High                                      | Cell Death OFF                                            | Cell Death OFF                                            |
|                            |                                  | IFN-II treatment                                                              | Virion OFF, IFN-II High                                                 | Cell Death OFF                                            | Cell Death OFF                                            |
| Hoffman et al. (2020)      | E6 Vero (TMPRSS2+)               | Control                                                                       | Virion OFF, IL-6 High, IL-8 High, IL-2 High, IL-1B High                 | Cell Death OFF                                            | Cell Death OFF                                            |
|                            |                                  | Cytokine cocktail (IL-6, IL-8, IL-2, IL-1B)                                   | Virion OFF, IL-6 High, IL-8 High, IL-2 High, IL-1B High                 | Cell Death OFF                                            | Cell Death OFF                                            |
| Meng et al. (2015)         | Rat primary lung fibroblast      | Control                                                                       | Virion OFF, TNF-a High, IFN-III High                                    | Cell Death OFF                                            | Cell Death OFF                                            |
|                            |                                  | TNF-a + IFN-III treatment                                                     | Virion OFF, TNF-a High, IFN-III High                                    | Cell Death OFF                                            | Cell Death OFF                                            |
| Thome et al. (2021)        | Calu-3                           | Control                                                                       | Virion OFF, TNF-a High, IFN-II High, STAT1 OFF                          | Cell Death OFF                                            | Cell Death OFF                                            |
|                            |                                  | TNF-a + IFN-II treatment, nos2-/-                                             | Virion OFF, TNF-a High, IFN-II High, INOS OFF                           | Cell Death OFF                                            | Cell Death OFF                                            |
| Hoffman et al. (2020)      | E6 Vero (TMPRSS2+)               | Control                                                                       | Virion OFF, Sensitivity of IFN Response Low                             | Cell Death High                                           | Cell Death High                                           |
|                            |                                  | Infected, RNA assay                                                           | Virion ON, Sensitivity of IFN Response Low                              | Cell Death High                                           | Cell Death High                                           |
| Thome et al. (2021)        | Calu-3                           | Control                                                                       | Virion OFF, Sensitivity of IFN Response Low                             | Cell Death High                                           | Cell Death High                                           |
|                            |                                  | Infected + MDAS siRNA, RNA assay                                              | Virion ON, Sensitivity of IFN Response Low, MDAS OFF                    | Cell Death High                                           | Cell Death High                                           |
| Hoffman et al. (2020)      | E6 Vero (TMPRSS2+)               | Control                                                                       | Virion ON, Sensitivity of IFN Response Low, RIG-1 OFF                   | Cell Death High                                           | Cell Death High                                           |
|                            |                                  | Infected + MAVS siRNA, RNA assay                                              | Virion ON, Sensitivity of IFN Response Low, MAVS OFF                    | Cell Death High                                           | Cell Death High                                           |
| Thome et al. (2021)        | Calu-3                           | Control                                                                       | Virion ON, Sensitivity of IFN Response Low, IKK OFF                     | Cell Death High                                           | Cell Death High                                           |
|                            |                                  | Infected + TPIC-1 (IKK inhibitor), RNA assay                                  | Virion ON, Sensitivity of IFN Response Low, IKK OFF                     | Cell Death High                                           | Cell Death High                                           |
| Hoffman et al. (2020)      | E6 Vero (TMPRSS2+)               | Control                                                                       | Virion ON, Sensitivity of IFN Response Low, Jak1 OFF, Jak2 OFF          | Cell Death High                                           | Cell Death High                                           |
|                            |                                  | Infected + Ruxolitinib (JAK1/2 inhibitor), RNA assay                          | Virion ON, Sensitivity of IFN Response Low, Jak1 OFF, Jak2 OFF          | Cell Death High                                           | Cell Death High                                           |

**Supplementary Table 4. Experiments from the literature used to validate the network model.** For each experiment, the table shows the publication or pre-print, the cell line used, the constraints applied to the model and the expected outcome, based on the experimental result. The final column shows the result of the model simulations, with deviations from the expected results highlighted in bold.

**Supplementary Table 5. Drugs used for in silico drug repurposing screens**

| Drug                | Target                                           | Passed PI COVID-19 Trial | Reference                                                                                   | DrugBank ID | DrugBank Interactions                                                                                                                                                                                                                                                                                                                                                                                                                          | Notes                                                                                                                                                                                                                |
|---------------------|--------------------------------------------------|--------------------------|---------------------------------------------------------------------------------------------|-------------|------------------------------------------------------------------------------------------------------------------------------------------------------------------------------------------------------------------------------------------------------------------------------------------------------------------------------------------------------------------------------------------------------------------------------------------------|----------------------------------------------------------------------------------------------------------------------------------------------------------------------------------------------------------------------|
| 1400W               | INOS                                             | No                       | Garvey, E. et al. (1997)                                                                    | DB02044     | Nitric oxide synthase, endothelial; Nitric oxide synthase, inducible ( <b>INOS</b> ); Nitric oxide synthase, brain                                                                                                                                                                                                                                                                                                                             |                                                                                                                                                                                                                      |
| 2-PAA-CMe           | ATF6, IRE1                                       | No                       | Zhang, H. et al. (2013)                                                                     | NA          | Drug not included in drugbank                                                                                                                                                                                                                                                                                                                                                                                                                  |                                                                                                                                                                                                                      |
| 4-FBA               | ERstress                                         | Yes                      | Hsu, A. et al. (2020); Kolb, P. S., et al. (2015)                                           | DB06819     | Aromatic-amino-acid aminotransferase; Thermolysin                                                                                                                                                                                                                                                                                                                                                                                              |                                                                                                                                                                                                                      |
| 4EGI-1              | eIF4G                                            | No                       | Shives, K. et al. (2016)                                                                    | NA          | Drug not included in drugbank                                                                                                                                                                                                                                                                                                                                                                                                                  |                                                                                                                                                                                                                      |
| A779                | MasR                                             | No                       | Meng, Y. et al. (2015)                                                                      | NA          | Drug not included in drugbank                                                                                                                                                                                                                                                                                                                                                                                                                  |                                                                                                                                                                                                                      |
| Ac-DMPD-CMK         | GasderminE                                       | No                       | Xu, W. et al. (2021)                                                                        | NA          | Drug not included in drugbank                                                                                                                                                                                                                                                                                                                                                                                                                  |                                                                                                                                                                                                                      |
| ACEI                | ACE1                                             | Yes                      | NCT04353596                                                                                 | DB00542     | Angiotensin-converting enzyme ( <b>ACE1</b> )                                                                                                                                                                                                                                                                                                                                                                                                  |                                                                                                                                                                                                                      |
| Actimmune           | IFN-II                                           | Yes                      | Razaghi, A. et al. (2016)                                                                   | DB00033     | Interferon gamma receptor 1; Interferon gamma receptor 2                                                                                                                                                                                                                                                                                                                                                                                       | Actimmune = IFN-II, which binds to IFN-IR                                                                                                                                                                            |
| AE0771              | PKC                                              | No                       | Skvára, H. et al. (2008)                                                                    | DB12369     | No interactions reported in drugbank                                                                                                                                                                                                                                                                                                                                                                                                           |                                                                                                                                                                                                                      |
| Aliskiren           | AngII, Ang1-7                                    | Yes                      | NCT04432350                                                                                 | DB09026     | Renin                                                                                                                                                                                                                                                                                                                                                                                                                                          |                                                                                                                                                                                                                      |
| Anifrolumab         | IFNAR                                            | Yes                      | Riggs, J. et al. (2018)                                                                     | DB11976     | No interactions reported in drugbank                                                                                                                                                                                                                                                                                                                                                                                                           |                                                                                                                                                                                                                      |
| Apilmod             | PKTyve                                           | Yes                      | NCT04446377                                                                                 | DB05611     | No interactions reported in drugbank                                                                                                                                                                                                                                                                                                                                                                                                           |                                                                                                                                                                                                                      |
| ARB                 | AT1R                                             | Yes                      | NCT04353596                                                                                 | DB00678     | Type-1 angiotensin II receptor ( <b>AT1R</b> )                                                                                                                                                                                                                                                                                                                                                                                                 |                                                                                                                                                                                                                      |
| Banantin            | nsp13                                            | No                       | Tanner, J. et al. (2005); Habtemariam, S. et al. (2020)                                     | NA          | Drug not included in drugbank                                                                                                                                                                                                                                                                                                                                                                                                                  |                                                                                                                                                                                                                      |
| Baricitinib         | Jak1, Jak2, ViralFusion IL-2                     | Yes                      | NCT04340232                                                                                 | DB11817     | Tyrosine-protein kinase <b>JAK1</b> ; Tyrosine-protein kinase <b>JAK2</b> ; Tyrosine-protein kinase 2-beta; Tyrosine-protein kinase <b>JAK3</b>                                                                                                                                                                                                                                                                                                |                                                                                                                                                                                                                      |
| Basiliximab         | IL-2                                             | Yes                      | Onrust, S. et al. (1999)                                                                    | DB00074     | Interleukin-2 receptor subunit alpha; Interleukin-2 receptor subunit beta                                                                                                                                                                                                                                                                                                                                                                      | Basiliximab is an anti-IL-2R ab but receptor is not modelled                                                                                                                                                         |
| Belnacasan          | Caspase-1                                        | Yes                      | Kudelova, J. et al. (2015)                                                                  | DB05507     | <b>Caspase-1</b> ; Interleukin-1 beta ( <b>not modelled</b> )                                                                                                                                                                                                                                                                                                                                                                                  | Effect of Belnacasan on IL-1B is indirect.                                                                                                                                                                           |
| BG-323              | guanylyltransferase                              | No                       | Stahla-Beek, H. et al. (2012)                                                               | NA          | Drug not included in drugbank                                                                                                                                                                                                                                                                                                                                                                                                                  |                                                                                                                                                                                                                      |
| BX795               | TBK1                                             | No                       | Yu, T. et al. (2015)                                                                        | NA          | Drug not included in drugbank                                                                                                                                                                                                                                                                                                                                                                                                                  |                                                                                                                                                                                                                      |
| C-176               | STING                                            | No                       | Haag, S. et al. (2018)                                                                      | NA          | Drug not included in drugbank                                                                                                                                                                                                                                                                                                                                                                                                                  |                                                                                                                                                                                                                      |
| C16                 | PKR                                              | No                       | Gal-Ben-Ari, S. et al. (2018)                                                               | NA          | Drug not included in drugbank                                                                                                                                                                                                                                                                                                                                                                                                                  |                                                                                                                                                                                                                      |
| Camostat            | TMPRSS2                                          | Yes                      | NCT04583592                                                                                 | DB13729     | Trypsin-1; Transmembrane protease serine 2 ( <b>TMPRSS2</b> ); Suppressor of tumorigenicity 14 protein; Cholecystokinin                                                                                                                                                                                                                                                                                                                        |                                                                                                                                                                                                                      |
| Canakinumab         | IL-1B                                            | Yes                      | NCT04362813                                                                                 | DB06168     | Interleukin-1 beta ( <b>IL-1B</b> )                                                                                                                                                                                                                                                                                                                                                                                                            |                                                                                                                                                                                                                      |
| Carlumab            | CCL2                                             | Yes                      | Lim, S. et al. (2016)                                                                       | DB12718     | No interactions reported in drugbank                                                                                                                                                                                                                                                                                                                                                                                                           |                                                                                                                                                                                                                      |
| Cetuximab           | EGFR                                             | Yes                      |                                                                                             | DB00002     | Epidermal growth factor receptor (EGFR); Low affinity immunoglobulin gamma Fc region receptor III-B; Complement C1q subcomponent subunit A; Complement C1q subcomponent subunit B; Complement C1q subcomponent subunit C; Low affinity immunoglobulin gamma Fc region receptor III-A; High affinity immunoglobulin gamma Fc receptor I; Low affinity immunoglobulin gamma Fc region receptor II-a                                              |                                                                                                                                                                                                                      |
| Chloroquine         | IL-6                                             | Yes                      | NCT04333628                                                                                 | DB00608     | Glutathione S-transferase A2; Tumor necrosis factor ( <b>TNF-a</b> ); Toll-like receptor 9; Glutathione S-transferase; High mobility group protein B1; Glutathione S-transferase Mu 1; Angiotensin-converting enzyme 2 ( <b>not modelled</b> )                                                                                                                                                                                                 | Chloroquine blocks glycosylation of ACE2, no direct evidence that this prevents binding by spike protein.                                                                                                            |
| Colchicine          | Inflammasome                                     | Yes                      | NCT04355143                                                                                 | DB01394     | Tubulin beta chain                                                                                                                                                                                                                                                                                                                                                                                                                             |                                                                                                                                                                                                                      |
| Copanlisib          | IL-10, TNF-a, NF-kB, JNK, ERK, p38, IL-1B, IL-18 | Yes                      | Yang, J. et al. (2019)                                                                      | DB12483     | Phosphatidylinositol 4,5-bisphosphate 3-kinase catalytic subunit alpha isoform ( <b>PI3K</b> ); Phosphatidylinositol 4,5-bisphosphate 3-kinase catalytic subunit delta isoform ( <b>PI3K</b> )                                                                                                                                                                                                                                                 |                                                                                                                                                                                                                      |
| Dexamethasone       | IL-18                                            | Yes                      | NCT04381936                                                                                 | DB01234     | Glucocorticoid receptor; Nuclear receptor subfamily 0 group B member 1; Annexin A1; Nitric oxide synthase, inducible ( <b>not modelled</b> ); Nuclear receptor subfamily 1 group I member 2                                                                                                                                                                                                                                                    | Effect of dexamethasone on iNOS is indirect.                                                                                                                                                                         |
| DHMEQ               | NF-kB                                            | No                       | Herrington, F. et al. (2015)                                                                | NA          | Drug not included in drugbank                                                                                                                                                                                                                                                                                                                                                                                                                  |                                                                                                                                                                                                                      |
| Diamfram            | GasderminD                                       | Yes                      | NCT04485130                                                                                 | DB00822     | Aldehyde dehydrogenase, mitochondrial; Dopamine beta-hydroxylase                                                                                                                                                                                                                                                                                                                                                                               |                                                                                                                                                                                                                      |
| DX600               | ACE2                                             | Yes                      | Uhal, B. et al. (2011)                                                                      | NA          | Drug not included in drugbank                                                                                                                                                                                                                                                                                                                                                                                                                  |                                                                                                                                                                                                                      |
| E64d                | CathepsinL                                       | No                       | Hoffmann, M. et al. (2020)                                                                  | NA          | Drug not included in drugbank                                                                                                                                                                                                                                                                                                                                                                                                                  |                                                                                                                                                                                                                      |
| Emricasan           | Caspase-1, Caspase-3, Caspase-8, Caspase-10      | Yes                      | Kudelova, J. et al. (2015)                                                                  | DB05408     | <b>Caspase-1</b> ; <b>Caspase-3</b> ; Caspase-7                                                                                                                                                                                                                                                                                                                                                                                                | Literature cited in drugbank does not indicate direct interaction between Fedralinib and JAK1.                                                                                                                       |
| Fedralinib          | Jak2                                             | Yes                      |                                                                                             | DB12500     | Tyrosine-protein kinase <b>JAK2</b> ; Receptor-type tyrosine-protein kinase FLT2; Tyrosine-protein kinase JAK1 (not modelled)                                                                                                                                                                                                                                                                                                                  |                                                                                                                                                                                                                      |
| GLX351322           | Nox4                                             | No                       | Anvari, E. et al. (2015)                                                                    | NA          | Drug not included in drugbank                                                                                                                                                                                                                                                                                                                                                                                                                  |                                                                                                                                                                                                                      |
| GRL-0617            | PLpro                                            | No                       | Shin, D. et al. (2020)                                                                      | NA          | Drug not included in drugbank                                                                                                                                                                                                                                                                                                                                                                                                                  |                                                                                                                                                                                                                      |
| GSK2656157          | PERK                                             | No                       | Axten, J. et al. (2013)                                                                     | NA          | Drug not included in drugbank                                                                                                                                                                                                                                                                                                                                                                                                                  |                                                                                                                                                                                                                      |
| Homoharringtonine   | 60S                                              | Yes                      | Choy, K.-T., et al. 2020; Winer, E. S., et al. 2018                                         | DB04865     | 50S ribosomal protein L2; <b>60S</b> ribosomal protein L3                                                                                                                                                                                                                                                                                                                                                                                      |                                                                                                                                                                                                                      |
| Infliximab          | TNF-a glycosylation                              | Yes                      | NCT04425538                                                                                 | DB00065     | Tumor necrosis factor ( <b>TNF-a</b> )                                                                                                                                                                                                                                                                                                                                                                                                         | Mannosyl-oligosaccharide alpha-1,2-mannosidase ( <b>glycosylation</b> ); Alpha-mannosidase 2 ( <b>glycosylation</b> ); Endoplasmic reticulum mannosyl-oligosaccharide 1,2-alpha-mannosidase ( <b>glycosylation</b> ) |
| Kifunensine         | 3CLpro                                           | No                       | Yang, Q. et al. (2020); Choy, K.-T., et al. 2020; Ma, C., et al. 2020; Cao, B., et al. 2020 | DB02742     | Human immunodeficiency virus type 1 protease                                                                                                                                                                                                                                                                                                                                                                                                   |                                                                                                                                                                                                                      |
| Lopinavir           | p38                                              | Yes                      | NCT04372628                                                                                 | DB01601     | No interactions reported in drugbank                                                                                                                                                                                                                                                                                                                                                                                                           |                                                                                                                                                                                                                      |
| Losmapimod          | eIF4E                                            | Yes                      | NCT04511819                                                                                 | DB12270     | No interactions reported in drugbank                                                                                                                                                                                                                                                                                                                                                                                                           |                                                                                                                                                                                                                      |
| LY2275796           | eIF4E                                            | No                       |                                                                                             | DB05165     | Eukaryotic translation initiation factor 4E ( <b>eIF-4E</b> )                                                                                                                                                                                                                                                                                                                                                                                  |                                                                                                                                                                                                                      |
| LY2584702           | SGK                                              | No                       | Tolcher, A. et al. (2014)                                                                   | DB12890     | No interactions reported in drugbank                                                                                                                                                                                                                                                                                                                                                                                                           |                                                                                                                                                                                                                      |
| MCC950              | NLRP3                                            | No                       | Coll, R. (2015)                                                                             | NA          | Drug not included in drugbank                                                                                                                                                                                                                                                                                                                                                                                                                  |                                                                                                                                                                                                                      |
| Mi-1851             | furin                                            | No                       | Bestle, D. et al. (2020); Xiu, S. et al. (2020)                                             | NA          | Drug not included in drugbank                                                                                                                                                                                                                                                                                                                                                                                                                  |                                                                                                                                                                                                                      |
| Miltefosine         | Akt                                              | Yes                      | Nitulescu, G. et al. (2015)                                                                 | DB09031     | P-glycoprotein 1                                                                                                                                                                                                                                                                                                                                                                                                                               |                                                                                                                                                                                                                      |
| miR-146a            | TRAF6                                            | No                       | Gao, W. et al. (2017)                                                                       | NA          | Drug not included in drugbank                                                                                                                                                                                                                                                                                                                                                                                                                  |                                                                                                                                                                                                                      |
| ROS                 | ROS                                              | No                       |                                                                                             |             | Glutathione synthetase; Cystine/glutamate transporter; NAFQI (N-acetyl-p-benzoquinone imine); Aminoacylase-1; Inhibitor of nuclear factor kappa-B kinase subunit beta ( <b>not modelled</b> ); Inhibitor of nuclear factor kappa-B kinase subunit alpha ( <b>not modelled</b> ); Glutamate receptor ionotropic, NMDA 2B; Glutamate receptor ionotropic, NMDA 1; Glutamate receptor ionotropic, NMDA 2A; Glutamate receptor ionotropic, NMDA 3A |                                                                                                                                                                                                                      |
| N-acetylcysteine    |                                                  | Yes                      | Meng, Y. et al. (2015)                                                                      | DB06151     | NMDA 2A; Glutamate receptor ionotropic, NMDA 2D; Glutamate receptor ionotropic, NMDA 3A                                                                                                                                                                                                                                                                                                                                                        | Effect of N-acetylcysteine on IKK is indirect.                                                                                                                                                                       |
| Necrostatin-1       | RIPK1                                            | No                       | Degterev, A. et al. (2019)                                                                  | NA          | Drug not included in drugbank                                                                                                                                                                                                                                                                                                                                                                                                                  |                                                                                                                                                                                                                      |
| Necrosulfonamide    | MLKL                                             | No                       | Liao, D. et al. (2014)                                                                      | NA          | Drug not included in drugbank                                                                                                                                                                                                                                                                                                                                                                                                                  |                                                                                                                                                                                                                      |
| Nivocasan           | Caspase-1, Caspase-8                             | Yes                      | Kudelova, J. et al. (2015)                                                                  | DB12720     | No interactions reported in drugbank                                                                                                                                                                                                                                                                                                                                                                                                           |                                                                                                                                                                                                                      |
| NSC80734            | IL-18                                            | No                       | Krumm, B. et al. (2017)                                                                     | NA          | Drug not included in drugbank                                                                                                                                                                                                                                                                                                                                                                                                                  |                                                                                                                                                                                                                      |
| PF-06926647         | Tyk2                                             | No                       | Gerstenberger, B. (2020)                                                                    | NA          | Drug not included in drugbank                                                                                                                                                                                                                                                                                                                                                                                                                  |                                                                                                                                                                                                                      |
| Rapamycin           | mTORC1                                           | Yes                      | NCT04341675                                                                                 | DB00877     | Serine/threonine-protein kinase <b>mTOR</b> ; Peptidyl-prolyl cis-trans isomerase FKBP1A; Fibroblast growth factor 2                                                                                                                                                                                                                                                                                                                           |                                                                                                                                                                                                                      |
| Recombinant_IL-10   | IL-10                                            | Yes                      | Asadullah, K. et al. (2003)                                                                 | NA          | Drug not included in drugbank                                                                                                                                                                                                                                                                                                                                                                                                                  |                                                                                                                                                                                                                      |
| RecombinantIFNlambd | IFN-III                                          | No                       | Donnelly, R. et al. (2010)                                                                  | DB12880     | No interactions reported in drugbank                                                                                                                                                                                                                                                                                                                                                                                                           |                                                                                                                                                                                                                      |
| Remdesivir          | nsp12-nsp7-nsp8                                  | Yes                      | NCT04280705                                                                                 | DB14761     | Replicase polyprotein 1ab; Replicase polyprotein 1ab; Replicase polyprotein 1ab; RNA-directed RNA polymerase L ( <b>nsp12-nsp7-nsp8</b> )                                                                                                                                                                                                                                                                                                      |                                                                                                                                                                                                                      |
| Roferon-A           | IFN-I                                            | Yes                      | NCT04293887                                                                                 | DB00034     | Interferon alpha/beta receptor 1; Interferon alpha/beta receptor 2                                                                                                                                                                                                                                                                                                                                                                             | Roferon-A = IFN-I, which binds to IFN-IR                                                                                                                                                                             |
| Ruxolitinib         | Jak1, Jak2                                       | Yes                      | NCT04377620                                                                                 | DB08877     | Tyrosine-protein kinase <b>JAK1</b> ; Tyrosine-protein kinase <b>JAK2</b>                                                                                                                                                                                                                                                                                                                                                                      |                                                                                                                                                                                                                      |
| Salubrial           | eIF2                                             | No                       | Boyce, M. et al. (2005)                                                                     | NA          | Drug not included in drugbank                                                                                                                                                                                                                                                                                                                                                                                                                  |                                                                                                                                                                                                                      |
| SAR113945           | IKK                                              | Yes                      | Herrington, F. et al. (2015)                                                                | NA          | Drug not included in drugbank                                                                                                                                                                                                                                                                                                                                                                                                                  |                                                                                                                                                                                                                      |
| JNK                 | JNK                                              | No                       |                                                                                             |             | Serine/threonine-protein kinase <b>JNK</b> ; Dual specificity protein kinase TTK                                                                                                                                                                                                                                                                                                                                                               |                                                                                                                                                                                                                      |
| SP600125            | TAK1                                             | No                       | Wang, J. et al. (2017)                                                                      | DB01782     | Drug not included in drugbank                                                                                                                                                                                                                                                                                                                                                                                                                  |                                                                                                                                                                                                                      |
| Takinib             | TAK1                                             | No                       | Totzke, J. et al. (2017)                                                                    | NA          | Drug not included in drugbank                                                                                                                                                                                                                                                                                                                                                                                                                  |                                                                                                                                                                                                                      |
| TAPI-1              | ADAM17                                           | No                       | Palau, V. et al. (2020)                                                                     | NA          | Drug not included in drugbank                                                                                                                                                                                                                                                                                                                                                                                                                  |                                                                                                                                                                                                                      |
| Tetrandrine         | TPC2                                             | Yes                      | Ou, X. et al. (2020)                                                                        | DB14066     | P-glycoprotein 1                                                                                                                                                                                                                                                                                                                                                                                                                               |                                                                                                                                                                                                                      |
| Tocilizumab         | IL-6                                             | Yes                      | NCT04479358                                                                                 | DB06273     | Interleukin-6 receptor subunit alpha ( <b>IL-6</b> )                                                                                                                                                                                                                                                                                                                                                                                           | Tocilizumab is an anti-IL-6R ab but receptor is not modelled                                                                                                                                                         |
| TP29                | nsp16                                            | No                       | Decroly, E. et al. (2008)                                                                   | NA          | Drug not included in drugbank                                                                                                                                                                                                                                                                                                                                                                                                                  |                                                                                                                                                                                                                      |
| TRV120027           | AT1R                                             | No                       | Forrester, S. et al. (2018)                                                                 | DB12199     | No interactions reported in drugbank                                                                                                                                                                                                                                                                                                                                                                                                           |                                                                                                                                                                                                                      |
| Ulixertinib         | ERK                                              | Yes                      |                                                                                             |             | Mitogen-activated protein kinase 3 ( <b>ERK</b> ); Mitogen-activated protein kinase 1 ( <b>ERK</b> )                                                                                                                                                                                                                                                                                                                                           |                                                                                                                                                                                                                      |
| Umifenovir          | ACE2-Spike, S                                    | Yes                      | NCT04260594                                                                                 | DB13609     | No interactions reported in drugbank                                                                                                                                                                                                                                                                                                                                                                                                           |                                                                                                                                                                                                                      |
| ROCK                | ROCK                                             | Yes                      | Wang, X. et al. (2020)                                                                      |             | cAMP-dependent protein kinase catalytic subunit alpha; cAMP-dependent protein kinase inhibitor alpha; Rho-associated protein kinase 1 ( <b>ROCK</b> ); Rho-associated protein kinase 2 ( <b>ROCK</b> )                                                                                                                                                                                                                                         |                                                                                                                                                                                                                      |
| Y-27632             | eIF4A                                            | No                       | Meng, Y. et al. (2015)                                                                      | DB08756     | Drug not included in drugbank                                                                                                                                                                                                                                                                                                                                                                                                                  |                                                                                                                                                                                                                      |
| Zotatifin           | eIF4A                                            | No                       | NCT04632381                                                                                 | DB16408     | No interactions reported in drugbank                                                                                                                                                                                                                                                                                                                                                                                                           |                                                                                                                                                                                                                      |

**Supplementary Table 5. Drugs used for in silico drug repurposing screens.** For each drug, the table contains its targets, whether it has passed phase II clinical trials (1 means it has), clinical trials identifier (if in trials to treat COVID-19), a reference or drugbank ID, any targets listed in the Drugbank database and notes on how interaction of the drugs with these targets are modelled. In the drugbank targets column, the node in the model used to represent a specific target is written in bold. In some cases, drugbank includes indirect drug interactions, where the effect of the drug is mediated by other proteins or pathways, such targets were not modelled.

**Supplementary Table 6. Classification of nodes in the network model**

| <b>Node</b>                 | <b>Type</b>              | <b>Pathway</b>       |
|-----------------------------|--------------------------|----------------------|
| 3CLpro                      | Cellular Process         | Non-Structural       |
| 40S                         | Host Protein or Complex  | Translation          |
| 43S                         | Host Protein or Complex  | Translation          |
| 4E-BP                       | Host Protein or Complex  | Translation          |
| 60S                         | Host Protein or Complex  | Translation          |
| 7SL                         | RNA                      | IFN                  |
| ACE1                        | Host Protein or Complex  | AT1R                 |
| ACE2                        | Viral Protein or Complex | Entry                |
| ACE2-Spike                  | Viral Protein or Complex | Entry                |
| ADAM17                      | Host Protein or Complex  | Entry                |
| Akt                         | Host Protein or Complex  | Signalling           |
| Ang1-7                      | Host Protein or Complex  | AT1R                 |
| AngII                       | Host Protein or Complex  | AT1R                 |
| Apoptosis                   | Cellular Process         | Inflammasome         |
| ASC                         | Host Protein or Complex  | Inflammasome         |
| AT1R                        | Host Protein or Complex  | AT1R                 |
| ATF6                        | Host Protein or Complex  | AT1R                 |
| Cap-independent Translation | Cellular Process         | Translation          |
| Caspase-1                   | Host Protein or Complex  | Inflammasome         |
| Caspase-10                  | Host Protein or Complex  | Inflammasome         |
| Caspase-3                   | Host Protein or Complex  | Inflammasome         |
| Caspase-8                   | Host Protein or Complex  | Inflammasome         |
| CathepsinL                  | Host Protein or Complex  | Entry                |
| CCL2                        | Host Protein or Complex  |                      |
| CellDeath                   | Cellular Process         | Inflammasome         |
| CH25H                       | Host Protein or Complex  | IFN                  |
| CXCL10                      | Host Protein or Complex  |                      |
| CXCL11                      | Host Protein or Complex  |                      |
| CXCL9                       | Host Protein or Complex  |                      |
| CytosolicPRRs               | Host Protein or Complex  | Sensing of Viral RNA |
| DMVformation                | Cellular Process         | RTC                  |
| E                           | Viral Protein or Complex | Structural           |
| EGFR                        | Host Protein or Complex  | Signalling           |
| eIF2                        | Host Protein or Complex  | Translation          |
| eIF4A                       | Host Protein or Complex  | Translation          |
| eIF4B                       | Host Protein or Complex  | Translation          |
| eIF4E                       | Host Protein or Complex  | Translation          |
| eIF4F                       | Host Protein or Complex  | Translation          |
| eIF4G                       | Host Protein or Complex  | Translation          |
| EndosomalpH                 | Cellular Process         | Entry                |
| ERK                         | Host Protein or Complex  | Signalling           |
| ERstress                    | Cellular Process         | AT1R                 |
| Fibrosis                    | Cellular Process         | Signalling           |
| furin                       | Host Protein or Complex  | Structural           |
| GasderminD                  | Host Protein or Complex  | Inflammasome         |
| GasderminE                  | Host Protein or Complex  | Inflammasome         |
| glycosylation               | Cellular Process         | Structural           |
| guanylyltransferase         | Host Protein or Complex  | Translation          |

| <b>Node</b>                  | <b>Type</b>              | <b>Pathway</b>       |
|------------------------------|--------------------------|----------------------|
| HostCap-dependentTranslation | Cellular Process         | Translation          |
| HostmRNAs                    | RNA                      | Translation          |
| HostProteinSynthesis         | Cellular Process         | Translation          |
| IFITM                        | Host Protein or Complex  | IFN                  |
| IFN-I                        | Host Protein or Complex  |                      |
| IFN-I_SG                     | Cellular Process         | IFN                  |
| IFN-II                       | Host Protein or Complex  |                      |
| IFN-II_SG                    | Cellular Process         | IFN                  |
| IFN-III                      | Host Protein or Complex  |                      |
| IFN-III_SG                   | Cellular Process         | IFN                  |
| IFN-LR1                      | Host Protein or Complex  | IFN                  |
| IFNAR                        | Host Protein or Complex  | IFN                  |
| IFNGR                        | Host Protein or Complex  | IFN                  |
| IkBα                         | Host Protein or Complex  | Sensing of Viral RNA |
| IKK                          | Host Protein or Complex  | Sensing of Viral RNA |
| IL-10                        | Host Protein or Complex  |                      |
| IL-18                        | Host Protein or Complex  |                      |
| IL-1B                        | Host Protein or Complex  |                      |
| IL-2                         | Host Protein or Complex  |                      |
| IL-6                         | Host Protein or Complex  |                      |
| IL-8                         | Host Protein or Complex  |                      |
| ImmuneCells                  | Cellular Process         |                      |
| Inflammasome                 | Host Protein or Complex  | Inflammasome         |
| Inflammation                 | Cellular Process         |                      |
| iNOS                         | Host Protein or Complex  | Inflammasome         |
| IRE1                         | Host Protein or Complex  | AT1R                 |
| IRF3                         | Host Protein or Complex  | IFN                  |
| IRF7                         | Host Protein or Complex  | IFN                  |
| IRF9                         | Host Protein or Complex  | IFN                  |
| Jak1                         | Host Protein or Complex  | IFN                  |
| Jak2                         | Host Protein or Complex  | IFN                  |
| JNK                          | Host Protein or Complex  | Signalling           |
| LY6E                         | Host Protein or Complex  | IFN                  |
| M                            | Viral Protein or Complex | Structural           |
| MasR                         | Host Protein or Complex  | AT1R                 |
| MAVS                         | Host Protein or Complex  | Sensing of Viral RNA |
| MDA5                         | Host Protein or Complex  | Sensing of Viral RNA |
| MLKL                         | Host Protein or Complex  | Inflammasome         |
| mTORC1                       | Host Protein or Complex  | Signalling           |
| N                            | Viral Protein or Complex | Structural           |
| Necroptosis                  | Cellular Process         | Inflammasome         |
| NF-κB                        | Host Protein or Complex  | Inflammasome         |
| NKRF                         | Host Protein or Complex  | Sensing of Viral RNA |
| NLRP3                        | Host Protein or Complex  | Inflammasome         |
| NO                           | Cellular Process         | Inflammasome         |
| Nox4                         | Host Protein or Complex  | AT1R                 |
| nsp1                         | Viral Protein or Complex | Non-Structural       |
| nsp1_nsp2_nsp3_nsp4          | Viral Protein or Complex | Non-Structural       |
| nsp10                        | Viral Protein or Complex | Non-Structural       |
| nsp10-nsp14                  | Viral Protein or Complex | RTC                  |

| <b>Node</b>              | <b>Type</b>                 | <b>Pathway</b>       |
|--------------------------|-----------------------------|----------------------|
| nsp10-nsp16              | Viral Protein or Complex    | RTC                  |
| nsp11                    | Viral Protein or Complex    | Non-Structural       |
| nsp12                    | Viral Protein or Complex    | Non-Structural       |
| nsp12-nsp7-nsp8          | Viral Protein or Complex    | RTC                  |
| nsp13                    | Viral Protein or Complex    | Non-Structural       |
| nsp14                    | Viral Protein or Complex    | Non-Structural       |
| nsp15                    | Viral Protein or Complex    | Non-Structural       |
| nsp16                    | Viral Protein or Complex    | Non-Structural       |
| nsp2                     | Viral Protein or Complex    | Non-Structural       |
| nsp3                     | Viral Protein or Complex    | Non-Structural       |
| nsp4                     | Viral Protein or Complex    | Non-Structural       |
| nsp5                     | Viral Protein or Complex    | Non-Structural       |
| nsp6                     | Viral Protein or Complex    | Non-Structural       |
| nsp7                     | Viral Protein or Complex    | Non-Structural       |
| nsp8                     | Viral Protein or Complex    | Non-Structural       |
| nsp9                     | Viral Protein or Complex    | Non-Structural       |
| OAS                      | Host Protein or Complex     | IFN                  |
| p105                     | Host Protein or Complex     | Inflammasome         |
| p38                      | Host Protein or Complex     | Signalling           |
| p3a                      | Viral Protein or Complex    | Accessory            |
| p3b                      | Viral Protein or Complex    | Accessory            |
| p6                       | Viral Protein or Complex    | Accessory            |
| p7a                      | Viral Protein or Complex    | Accessory            |
| p7b                      | Viral Protein or Complex    | Accessory            |
| p8                       | Viral Protein or Complex    | Accessory            |
| p9b                      | Viral Protein or Complex    | Accessory            |
| p9c                      | Viral Protein or Complex    | Accessory            |
| PANoptosome              | Host Protein or Complex     | Inflammasome         |
| PERK                     | Host Protein or Complex     | AT1R                 |
| PI3K                     | Host Protein or Complex     | Signalling           |
| PIKfyve                  | Host Protein or Complex     | Entry                |
| PKC                      | Host Protein or Complex     | Signalling           |
| PKR                      | Host Protein or Complex     | IFN                  |
| PLpro                    | Cellular Process            | Non-Structural       |
| pp1a                     | Viral Protein or Complex    | Non-Structural       |
| pp1ab                    | Viral Protein or Complex    | Non-Structural       |
| Pyroptosis               | Cellular Process            | Inflammasome         |
| RIG-1                    | Host Protein or Complex     | Sensing of Viral RNA |
| RIPK1                    | Host Protein or Complex     | Sensing of Viral RNA |
| RNAseL                   | Host Protein or Complex     | IFN                  |
| ROCK                     | Host Protein or Complex     | Signalling           |
| ROS                      | Cellular Process            | AT1R                 |
| S                        | Viral Protein or Complex    | Structural           |
| S6K                      | Host Protein or Complex     | Translation          |
| SensitivityOfIFNResponse | Sensitivity of IFN response |                      |
| Splicing                 | Cellular Process            | Translation          |
| SRP                      | Host Protein or Complex     | IFN                  |
| STAT1                    | Host Protein or Complex     | IFN                  |
| STAT2                    | Host Protein or Complex     | IFN                  |
| STING                    | Host Protein or Complex     | Sensing of Viral RNA |



| <b>Node</b>                   | <b>Type</b>              | <b>Pathway</b>       |
|-------------------------------|--------------------------|----------------------|
| SyncytiaFormation             | Cellular Process         |                      |
| T-cellInfiltration            | Cellular Process         |                      |
| TAK1                          | Host Protein or Complex  | Sensing of Viral RNA |
| TANK                          | Host Protein or Complex  | Sensing of Viral RNA |
| TBK1                          | Host Protein or Complex  | Sensing of Viral RNA |
| TLR3                          | Host Protein or Complex  | Sensing of Viral RNA |
| TLR3-TRIF                     | Host Protein or Complex  | Sensing of Viral RNA |
| TMPRSS2                       | Host Protein or Complex  | Entry                |
| TNF-a                         | Host Protein or Complex  |                      |
| TPC2                          | Host Protein or Complex  | Entry                |
| TRAF3                         | Host Protein or Complex  | Sensing of Viral RNA |
| TRAF6                         | Host Protein or Complex  | Sensing of Viral RNA |
| TRIF                          | Host Protein or Complex  | Sensing of Viral RNA |
| Tyk2                          | Host Protein or Complex  | IFN                  |
| U1_U2snRNAs                   | RNA                      | Translation          |
| ViralCap-dependentTranslation | Cellular Process         | Translation          |
| ViralEntry                    | Cellular Process         | Entry                |
| ViralEntry1                   | Cellular Process         | Entry                |
| ViralFusion                   | Cellular Process         | Entry                |
| ViralGenome                   | RNA                      | RTC                  |
| ViralGenomeDegradation        | Cellular Process         | Structural           |
| ViralReplication              | Cellular Process         | Structural           |
| ViralsgRNAs                   | RNA                      | Translation          |
| Virion                        | Viral Protein or Complex |                      |
| VirionERGIC                   | Viral Protein or Complex | Structural           |
| XBP1                          | Host Protein or Complex  | AT1R                 |
| ZAP                           | Host Protein or Complex  | IFN                  |

**Supplementary Table 6. Classification of nodes in the network model.** For each node, the type and pathway within the model are specified.

**Supplementary Table 7. *In silico* simulation of Caco-2 cell drug treatments**

| Condition | Treatment                   | Inflammation | Viral Entry | Viral Replication |
|-----------|-----------------------------|--------------|-------------|-------------------|
| Caco-2    | Control                     | 1            | 4           | 4                 |
| Caco-2    | Apilimod                    | 1            | 2           | 4                 |
| Caco-2    | Camostat                    | 1            | 2           | 4                 |
| Caco-2    | Camostat + Apilimod         | 0            | 0           | 0                 |
| Caco-2    | Miltefosine                 | 1            | 4           | 4                 |
| Caco-2    | Dexamethasone               | 0            | 4           | 4                 |
| Caco-2    | Dexamethasone + Miltefosine | 0            | 0           | 0                 |

**Supplementary Table 7. *In silico* simulation of Caco-2 cell drug treatments.** The Caco-2 cell line is modelled *in silico* by setting the "ImmuneCells" and "SensitivityOfIFNResponse" nodes to zero, reflecting the fact that Caco-2 cultures consist of clonal colorectal epithelial cells and do not mount an IFN response to SARS-CoV-2 infection.

## Supplementary References

Akopian, D., Shen, K., Zhang, X. & Shan, S. Signal Recognition Particle: An Essential Protein-Targeting Machine. *Annu. Rev. Biochem.* **82**, 693–721 (2013)

Alexandre, J., Cracowski, J. L., Richard, V. & Bouhanick, B. Renin-angiotensin-aldosterone system and COVID-19 infection. *Ann. Endocrinol. (Paris)*. **81**, 63–67 (2020)

Angelini, M. M., Akhlaghpour, M., Neuman, B. W. & Buchmeier, M. J. Severe acute respiratory syndrome coronavirus nonstructural proteins 3, 4, and 6 induce double-membrane vesicles. *MBio* **4**, (2013)

Anvari, E., Wikström, P., Walum, E. & Welsh, N. The novel NADPH oxidase 4 inhibitor GLX351322 counteracts glucose intolerance in high-fat diet-treated C57BL/6 mice. *Free Radic. Res.* **49**, 1308–1318 (2015)

Asadullah, K., Sterry, W. & Volk, H. D. Interleukin-10 therapy - Review of a new approach. *Pharmacol. Rev.* **55**, 241–269 (2003)

Axten, J. M. *et al.* Discovery of GSK2656157: An optimized PERK inhibitor selected for preclinical development. *ACS Med. Chem. Lett.* **4**, 964–968 (2013)

Ballou, L. M. & Lin, R. Z. Rapamycin and mTOR kinase inhibitors. *J. Chem. Biol.* **1**, 27–36 (2008)

Banerjee, A. K. *et al.* SARS-CoV-2 Disrupts Splicing, Translation, and Protein Trafficking to Suppress Host Defenses. *Cell* **183**, 1325-1339.e21 (2020)

Barrat, F. J., Crow, M. K. & Ivashkiv, L. B. Interferon target-gene expression and epigenomic signatures in health and disease. *Nat. Immunol.* **20**, 1574–1583 (2019)

Beigel, J. H. *et al.* Remdesivir for the Treatment of Covid-19 — Final Report. *N. Engl. J. Med.* **383**, 1813–1826 (2020)

Bestle, D. *et al.* TMPRSS2 and furin are both essential for proteolytic activation of SARS-CoV-2 in human airway cells. *Life Sci. Alliance* **3**, 1–14 (2020)

Bonnet, M. C., Daurat, C., Ottone, C. & Meurs, E. F. The N-terminus of PKR is responsible for the activation of the NF- $\kappa$ B signaling pathway by interacting with the IKK complex. *Cell. Signal.* **18**, 1865–1875 (2006)

Bouhaddou, M. *et al.* The Global Phosphorylation Landscape of SARS-CoV-2 Infection. *Cell* **182**, 685-712.e19 (2020)

Bouvet, M. *et al.* In Vitro Reconstitution of SARS-Coronavirus mRNA Cap Methylation. *PLoS Pathog.* **6**, e1000863 (2010)

- Bouvet, M. *et al.* RNA 3'-end mismatch excision by the severe acute respiratory syndrome coronavirus nonstructural protein nsp10/nsp14 exoribonuclease complex. *Proc. Natl. Acad. Sci. U. S. A.* **109**, 9372–9377 (2012)
- Boyce, M. *et al.* A selective inhibitor of eIF2 $\alpha$  dephosphorylation protects cells from ER stress. *Science (80-. )*. **307**, 935–939 (2005)
- Buchrieser, J. *et al.* Syncytia formation by SARS-CoV-2-infected cells. *EMBO J.* **39**, 1–12 (2020)
- Cao, B. *et al.* A Trial of Lopinavir–Ritonavir in Adults Hospitalized with Severe Covid-19. *N. Engl. J. Med.* **382**, 1787–1799 (2020)
- Cao, Y. *et al.* Ruxolitinib in treatment of severe coronavirus disease 2019 (COVID-19): A multicenter, single-blind, randomized controlled trial. *J. Allergy Clin. Immunol.* **146**, 137-146.e3 (2020)
- Chan, C.-P. *et al.* Modulation of the Unfolded Protein Response by the Severe Acute Respiratory Syndrome Coronavirus Spike Protein. *J. Virol.* **80**, 9279–9287 (2006)
- Chen, J. *et al.* Structural Basis for Helicase-Polymerase Coupling in the SARS-CoV-2 Replication-Transcription Complex. *Cell* **182**, 1560-1573.e13 (2020)
- Chen, Y., Liu, Q. & Guo, D. Emerging coronaviruses: Genome structure, replication, and pathogenesis. *J. Med. Virol.* **92**, 418–423 (2020)
- Chen, Z. & John Wherry, E. T cell responses in patients with COVID-19. *Nat. Rev. Immunol.* **20**, 529–536 (2020)
- Choy, K. T. *et al.* Remdesivir, lopinavir, emetine, and homoharringtonine inhibit SARS-CoV-2 replication in vitro. *Antiviral Res.* **178**, 104786 (2020)
- Christgen, S. *et al.* Identification of the PANoptosome: A Molecular Platform Triggering Pyroptosis, Apoptosis, and Necroptosis (PANoptosis). *Front. Cell. Infect. Microbiol.* **10**, 1–12 (2020)
- Coll, R. C. *et al.* A small-molecule inhibitor of the NLRP3 inflammasome for the treatment of inflammatory diseases. *Nat. Med.* **21**, 248–257 (2015)
- Cong, Y. *et al.* Nucleocapsid Protein Recruitment to Replication-Transcription Complexes Plays a Crucial Role in Coronaviral Life Cycle. *J. Virol.* **94**, 1–21 (2020)
- Davidson, A. D. *et al.* Characterisation of the transcriptome and proteome of SARS-CoV-2 reveals a cell passage induced in-frame deletion of the furin-like cleavage site from the spike glycoprotein. *Genome Med.* **12**, 15–68 (2020)
- Decroly, E. *et al.* Coronavirus Nonstructural Protein 16 Is a Cap-0 Binding Enzyme Possessing (Nucleoside-2'O)-Methyltransferase Activity. *J. Virol.* **82**, 8071–8084 (2008)

- Degterev, A., Ofengeim, D. & Yuan, J. Targeting RIPK1 for the treatment of human diseases. *Proc. Natl. Acad. Sci. U. S. A.* **116**, 9714–9722 (2019)
- Diao, B. *et al.* Reduction and Functional Exhaustion of T Cells in Patients With Coronavirus Disease 2019 (COVID-19). *Front. Immunol.* **11**, 727–7 (2020)
- Donnelly, R. P. & Kotenko, S. V. Interferon-lambda: A new addition to an old family. *J. Interf. Cytokine Res.* **30**, 555–564 (2010)
- Falvo, J. V., Tsytsykova, A. V. & Goldfeld, A. E. Transcriptional control of the TNF Gene. *Curr. Dir. Autoimmun.* **11**, 27–60 (2010)
- Fehr, A. R. & Perlman, S. Coronaviruses: An Overview of Their Replication and Pathogenesis. in *Coronaviruses: Methods and Protocols* vol. 1282 1–23 (2015).
- Forrester, S. J. *et al.* Angiotensin II signal transduction: An update on mechanisms of physiology and pathophysiology. *Physiol. Rev.* **98**, 1627–1738 (2018)
- Forrester, S. J. *et al.* Epidermal Growth Factor Receptor Transactivation: Mechanisms, Pathophysiology, and Potential Therapies in the Cardiovascular System. *Annu. Rev. Pharmacol. Toxicol.* **56**, 627–653 (2016)
- Gal-Ben-Ari, S., Barrera, I., Ehrlich, M. & Rosenblum, K. PKR: A kinase to remember. *Front. Mol. Neurosci.* **11**, 1–20 (2019)
- Gao, W., Xiong, Y., Li, Q. & Yang, H. Inhibition of toll-like receptor signaling as a promising therapy for inflammatory diseases: A journey from molecular to nano therapeutics. *Front. Physiol.* **8**, (2017)
- Garvey, E. P. *et al.* 1400W is a slow, tight binding, and highly selective inhibitor of inducible nitric-oxide synthase in vitro and in vivo. *J. Biol. Chem.* **272**, 4959–4963 (1997)
- Gerstenberger, B. S. *et al.* Discovery of Tyrosine Kinase 2 (TYK2) Inhibitor (PF-06826647) for the Treatment of Autoimmune Diseases. *J. Med. Chem.* **63**, 13561–13577 (2020)
- Gordon, D. E. *et al.* A SARS-CoV-2 protein interaction map reveals targets for drug repurposing. *Nature* **583**, 459–468 (2020)
- Goritzka, M. *et al.* Alpha/Beta Interferon Receptor Signaling Amplifies Early Proinflammatory Cytokine Production in the Lung during Respiratory Syncytial Virus Infection. *J. Virol.* **88**, 6128–6136 (2014)
- Haag, S. M. *et al.* Targeting STING with covalent small-molecule inhibitors. *Nature* **559**, 269–273 (2018)
- Habtemariam, S. *et al.* Should We Try SARS-CoV-2 Helicase Inhibitors for COVID-19 Therapy? *Arch. Med. Res.* **51**, 733–735 (2020)

- Hackbart, M., Deng, X. & Baker, S. C. Coronavirus endoribonuclease targets viral polyuridine sequences to evade activating host sensors. *Proc. Natl. Acad. Sci. U. S. A.* **117**, 8094–8103 (2020)
- Haga, S. *et al.* Modulation of TNF- $\alpha$ -converting enzyme by the spike protein of SARS-CoV and ACE2 induces TNF- $\alpha$  production and facilitates viral entry. *Proc. Natl. Acad. Sci. U. S. A.* **105**, 7809–7814 (2008)
- Hamid, Q. & Tulic, M. Immunobiology of asthma. *Annu. Rev. Physiol.* **71**, 489–507 (2009)
- Hayden, M. S. & Ghosh, S. Regulation of NF- $\kappa$ B by TNF family cytokines. *Semin. Immunol.* **26**, 253–266 (2014)
- Hecker, L. *et al.* NADPH oxidase-4 mediates myofibroblast activation and fibrogenic responses to lung injury. *Nat. Med.* **15**, 1077–1081 (2009)
- Herrington, F. D., Carmody, R. J. & Goodyear, C. S. Modulation of NF- $\kappa$ B Signaling as a Therapeutic Target in Autoimmunity. *J. Biomol. Screen.* **21**, 223–242 (2016)
- Hoffmann, M. *et al.* SARS-CoV-2 Cell Entry Depends on ACE2 and TMPRSS2 and Is Blocked by a Clinically Proven Protease Inhibitor. *Cell* **181**, 271-280.e8 (2020)
- Hsu, A. C. Y. *et al.* SARS-CoV-2 Spike protein promotes hyper-inflammatory response that can be ameliorated by Spike-antagonistic peptide and FDA-approved ER stress and MAP kinase inhibitors in vitro. *bioRxiv* (2020) doi:10.1101/2020.09.30.317818
- Hu, J. J. *et al.* FDA-approved disulfiram inhibits pyroptosis by blocking gasdermin D pore formation. *Nat. Immunol.* **21**, 736–745 (2020)
- Ingraham, N. E. *et al.* Understanding the renin-angiotensin-aldosterone-SARS-CoV axis: A comprehensive review. *Eur. Respir. J.* **56**, 2000912 (2020)
- Issa, E., Merhi, G., Panossian, B., Salloum, T. & Tokajian, S. SARS-CoV-2 and ORF3a: Nonsynonymous Mutations, Functional Domains, and Viral Pathogenesis. *mSystems* **5**, e00266-20 (2020)
- Ivashkiv, L. B. IFN $\gamma$ : signalling, epigenetics and roles in immunity, metabolism, disease and cancer immunotherapy. *Nat. Rev. Immunol.* **18**, 545–558 (2018)
- Kany, S., Vollrath, J. T. & Relja, B. Cytokines in inflammatory disease. *Int. J. Mol. Sci.* **20**, 6008–31 (2019)
- Karki, R. *et al.* Synergism of TNF- $\alpha$  and IFN- $\gamma$  Triggers Inflammatory Cell Death, Tissue Damage, and Mortality in SARS-CoV-2 Infection and Cytokine Shock Syndromes. *Cell* **184**, 149-168.e17 (2021)
- Kim, D. *et al.* The Architecture of SARS-CoV-2 Transcriptome. *Cell* **181**, 914-921.e10 (2020)

- Kim, S. Y. *et al.* Characterization of heparin and severe acute respiratory syndrome-related coronavirus 2 (SARS-CoV-2) spike glycoprotein binding interactions. *Antiviral Res.* **181**, (2020)
- Kirchdoerfer, R. N. & Ward, A. B. Structure of the SARS-CoV nsp12 polymerase bound to nsp7 and nsp8 co-factors. *Nat. Commun.* **10**, 2342–9 (2019)
- Kolb, P. S. *et al.* The therapeutic effects of 4-phenylbutyric acid in maintaining proteostasis. *Int. J. Biochem. Cell Biol.* **61**, 45–52 (2015)
- Kondrikov, D., Caldwell, R. B., Dong, Z. & Su, Y. Reactive oxygen species-dependent RhoA activation mediates collagen synthesis in hyperoxic lung fibrosis. *Free Radic. Biol. Med.* **50**, 1689–1698 (2011)
- Konno, Y. *et al.* SARS-CoV-2 ORF3b Is a Potent Interferon Antagonist Whose Activity Is Increased by a Naturally Occurring Elongation Variant. *Cell Rep.* **32**, 108185 (2020)
- Krumm, B., Meng, X., Xiang, Y. & Deng, J. Identification of small molecule inhibitors of Interleukin-18. *Sci. Rep.* **7**, 483 (2017)
- Kudelova, J., Fleischmannova, J., Adamova, E. & Matalova, E. Review article. *J. Physiol. Pharmacol. An Off. J. Polish Physiol. Soc.* **4**, 473–482 (2015)
- Kurosaki, T., Popp, M. W. & Maquat, L. E. Quality and quantity control of gene expression by nonsense-mediated mRNA decay. *Nat. Rev. Mol. Cell Biol.* **20**, 406–420 (2019)
- Lan, J. *et al.* Structure of the SARS-CoV-2 spike receptor-binding domain bound to the ACE2 receptor. *Nature* **581**, 215–220 (2020)
- Lee, S. J., Channappanavar, R. & Kanneganti, T. D. Coronaviruses: Innate Immunity, Inflammasome Activation, Inflammatory Cell Death, and Cytokines. *Trends Immunol.* **41**, 1083–1099 (2020)
- Lei, X. *et al.* Activation and evasion of type I interferon responses by SARS-CoV-2. *Nat. Commun.* **11**, 3810–12 (2020)
- Li, J. Y. *et al.* The ORF6, ORF8 and nucleocapsid proteins of SARS-CoV-2 inhibit type I interferon signaling pathway. *Virus Res.* **286**, 198074 (2020)
- Li, J. *et al.* Virus-Host Interactome and Proteomic Survey Reveal Potential Virulence Factors Influencing SARS-CoV-2 Pathogenesis. *Med* **2**, 99-112.e7 (2021)
- Liao, D. *et al.* Necrosulfonamide inhibits necroptosis by selectively targeting the mixed lineage kinase domain-like protein. *Medchemcomm* **5**, 333–337 (2014)
- Liao, W., Lin, J. X. & Leonard, W. J. Interleukin-2 at the Crossroads of Effector Responses, Tolerance, and Immunotherapy. *Immunity* **38**, 13–25 (2013)

- Lim, S. Y., Yuzhalin, A. E., Gordon-Weeks, A. N. & Muschel, R. J. Targeting the CCL2-CCR2 signaling axis in cancer metastasis. *Oncotarget* **7**, 28697–28710 (2016)
- Liu, J. *et al.* Longitudinal characteristics of lymphocyte responses and cytokine profiles in the peripheral blood of SARS-CoV-2 infected patients. *EBioMedicine* **55**, 102763 (2020)
- Liu, T., Zhang, L., Joo, D. & Sun, S. C. NF- $\kappa$ B signaling in inflammation. *Signal Transduct. Target. Ther.* **2**, a000034-9 (2017)
- Lokugamage, K. G. *et al.* Type I Interferon Susceptibility Distinguishes SARS-CoV-2 from SARS-CoV. *J. Virol.* **94**, (2020)
- Ma, C. *et al.* Boceprevir, GC-376, and calpain inhibitors II, XII inhibit SARS-CoV-2 viral replication by targeting the viral main protease. *Cell Res.* **30**, 678–692 (2020)
- Magnuson, B., Ekim, B. & Fingar, D. C. Regulation and function of ribosomal protein S6 kinase (S6K) within mTOR signalling networks. *Biochem. J.* **441**, 1–21 (2012)
- Makris, S., Paulsen, M. & Johansson, C. Type I interferons as regulators of lung inflammation. *Front. Immunol.* **8**, 1–10 (2017)
- Man, S. M., Karki, R. & Kanneganti, T. D. Molecular mechanisms and functions of pyroptosis, inflammatory caspases and inflammasomes in infectious diseases. *Immunol. Rev.* **277**, 61–75 (2017)
- Mantlo, E., Bukreyeva, N., Maruyama, J., Paessler, S. & Huang, C. Antiviral activities of type I interferons to SARS-CoV-2 infection. *Antiviral Res.* **179**, 104811–5 (2020)
- Martínez, G. J., Celermajer, D. S. & Patel, S. The NLRP3 inflammasome and the emerging role of colchicine to inhibit atherosclerosis-associated inflammation. *Atherosclerosis* **269**, 262–271 (2018)
- Matera, A. G. & Wang, Z. A day in the life of the spliceosome. *Nat. Rev. Mol. Cell Biol.* **15**, 108–121 (2014)
- Meng, Y. *et al.* The angiotensin-converting enzyme 2/angiotensin (1-7)/mas axis protects against lung fibroblast migration and lung fibrosis by inhibiting the NOX4-derived ROS-mediated RhoA/Rho kinase pathway. *Antioxidants Redox Signal.* **22**, 241–258 (2015)
- Mihara, M., Ohsugi, Y. & Kishimoto, T. Tocilizumab, a humanized anti-interleukin-6 receptor antibody, for treatment of rheumatoid arthritis. *Open Access Rheumatol. Res. Rev.* **3**, 19–29 (2011)
- Miorin, L. *et al.* SARS-CoV-2 Orf6 hijacks Nup98 to block STAT nuclear import and antagonize interferon signaling. *Proc. Natl. Acad. Sci. U. S. A.* **117**, 28344–28354 (2020)
- Mogensen, T. H. Pathogen recognition and inflammatory signaling in innate immune defenses. *Clin. Microbiol. Rev.* **22**, 240–273 (2009)



- Nakagawa, K., Lokugamage, K. G. & Makino, S. Viral and Cellular mRNA Translation in Coronavirus-Infected Cells. *Adv. Virus Res.* **96**, 165–192 (2016)
- Nchioua, R. *et al.* The Zinc Finger Antiviral Protein restricts SARS-CoV-2. *MBio* **130**, 2620–40 (2020)
- Nitulescu, G. M. *et al.* Akt inhibitors in cancer treatment: The long journey from drug discovery to clinical use (Review). *Int. J. Oncol.* **48**, 869–885 (2016)
- Ogando, N. S. *et al.* The Enzymatic Activity of the nsp14 Exoribonuclease Is Critical for Replication of MERS-CoV and SARS-CoV-2. *J. Virol.* **94**, (2020)
- Onrust, S. V & Wiseman, L. R. Basiliximab. **57**, 207–213 (1999)
- Ou, X. *et al.* Characterization of spike glycoprotein of SARS-CoV-2 on virus entry and its immune cross-reactivity with SARS-CoV. *Nat. Commun.* **11**, 1620–12 (2020)
- Palau, V., Riera, M. & Soler, M. J. ADAM17 inhibition may exert a protective effect on COVID-19. *Nephrol. Dial. Transplant.* **35**, 1071–1072 (2020)
- Pathinayake, P. S. *et al.* Understanding the unfolded protein response in the pathogenesis of asthma. *Front. Immunol.* **9**, 621–13 (2018)
- Pechkovsky, D. V. *et al.* CCR2 and CXCR3 agonistic chemokines are differently expressed and regulated in human alveolar epithelial cells type II. *Respir. Res.* **6**, 75 (2005)
- Pfaender, S. *et al.* LY6E impairs coronavirus fusion and confers immune control of viral disease. *Nat. Microbiol.* **5**, 1330–1339 (2020)
- Razaghi, A., Owens, L. & Heimann, K. Review of the recombinant human interferon gamma as an immunotherapeutic: Impacts of production platforms and glycosylation. *J. Biotechnol.* **240**, 48–60 (2016)
- Redza-Dutordoir, M. & Averill-Bates, D. A. Activation of apoptosis signalling pathways by reactive oxygen species. *Biochim. Biophys. Acta - Mol. Cell Res.* **1863**, 2977–2992 (2016)
- Ren, Y. *et al.* The ORF3a protein of SARS-CoV-2 induces apoptosis in cells. *Cell. Mol. Immunol.* **17**, 881–883 (2020)
- Ribero, M. S., Jouvenet, N., Dreux, M. & Nisole, S. Interplay between SARS-CoV-2 and the type I interferon response. *PLoS Pathog.* **16**, e1008737-22 (2020)
- Richardson, P. *et al.* Baricitinib as potential treatment for 2019-nCoV acute respiratory disease. *Lancet* **395**, e30–e31 (2020)
- Riggs, J. M. *et al.* Characterisation of anifrolumab, a fully human anti-interferon receptor antagonist antibody for the treatment of systemic lupus erythematosus. *Lupus Sci. Med.* **5**, 1–11 (2018)

- Robinson, P. C. *et al.* The Potential for Repurposing Anti-TNF as a Therapy for the Treatment of COVID-19. *Med* **1**, 90–102 (2020)
- Romano, M., Ruggiero, A., Squeglia, F., Maga, G. & Berisio, R. A Structural View of SARS-CoV-2 RNA Replication Machinery: RNA Synthesis, Proofreading and Final Capping. *Cells* **9**, (2020)
- Savarino, A., Boelaert, J. R., Cassone, A., Majori, G. & Cauda, R. Effects of chloroquine on viral infections: An old drug against today's diseases? *Lancet Infect. Dis.* **3**, 722–727 (2003)
- Schoggins, J. W. & Rice, C. M. Interferon-stimulated genes and their antiviral effector functions. *Curr. Opin. Virol.* **1**, 519–525 (2011)
- Schubert, K. *et al.* SARS-CoV-2 Nsp1 binds the ribosomal mRNA channel to inhibit translation. *Nat. Struct. Mol. Biol.* **27**, 959–966 (2020)
- Selvaraj, V., Dapaah-Afriyie, K., Finn, A. & Flanigan, T. P. Short-Term Dexamethasone in Sars-CoV-2 Patients. *R. I. Med. J. (2013)* **103**, 39–43 (2020)
- Shang, J. *et al.* Cell entry mechanisms of SARS-CoV-2. *Proc. Natl. Acad. Sci. U. S. A.* **117**, 11727–11734 (2020)
- Shin, D. *et al.* Papain-like protease regulates SARS-CoV-2 viral spread and innate immunity. *Nature* **587**, 657–662 (2020)
- Shives, K. D., Massey, A. R., May, N. A., Morrison, T. E. & Beckham, J. D. 4EBP-dependent signaling supports west nile virus growth and protein expression. *Viruses* **8**, (2016)
- Siu, K. L. *et al.* Severe acute respiratory syndrome Coronavirus ORF3a protein activates the NLRP3 inflammasome by promoting TRAF3-dependent ubiquitination of ASC. *FASEB J.* **33**, 8865–8877 (2019)
- Skvara, H. *et al.* The PKC inhibitor AEB071 may be a therapeutic option for psoriasis. *J. Clin. Invest.* **118**, 3151–3159 (2008)
- Smoak, K. A. & Cidlowski, J. A. Mechanisms of glucocorticoid receptor signaling during inflammation. *Mech. Ageing Dev.* **125**, 697–706 (2004)
- Snijder, E. J. *et al.* A unifying structural and functional model of the coronavirus replication organelle: Tracking down RNA synthesis. *PLoS Biol.* **18**, e3000715-25 (2020)
- Sonenberg, N. & Hinnebusch, A. G. Regulation of Translation Initiation in Eukaryotes: Mechanisms and Biological Targets. *Cell* **136**, 731–745 (2009)
- Song, G., Ouyang, G. & Bao, S. The activation of Akt/PKB signaling pathway and cell survival. *J. Cell. Mol. Med.* **9**, 59–71 (2005)

Sriram, K., Loomba, R. & Insel, P. A. Targeting the renin-angiotensin signaling pathway in COVID-19: Unanswered questions, opportunities, and challenges. *Proc. Natl. Acad. Sci. U. S. A.* **117**, 29274–29282 (2020)

Stahla-Beek, H. J. *et al.* Identification of a Novel Antiviral Inhibitor of the Flavivirus Guanylyltransferase Enzyme. *J. Virol.* **86**, 8730–8739 (2012)

Subissi, L. *et al.* One severe acute respiratory syndrome coronavirus protein complex integrates processive RNA polymerase and exonuclease activities. *Proc. Natl. Acad. Sci. U. S. A.* **111**, E3900–E3909 (2014)

Szelag, M., Piaszyk-Borychowska, A., Plens-Galaska, M., Wesoly, J. & Bluysen, H. A. R. Targeted inhibition of STATs and IRFs as a potential treatment strategy in cardiovascular disease. *Oncotarget* **7**, 48788–48812 (2016)

Tanaka, T., Narazaki, M. & Kishimoto, T. Immunotherapeutic implications of IL-6 blockade for cytokine storm. *Immunotherapy* **8**, 959–970 (2016)

Tanner, J. A. *et al.* The adamantane-derived bananins are potent inhibitors of the helicase activities and replication of SARS coronavirus. *Chem. Biol.* **12**, 303–311 (2005)

The RECOVERY Collaborative Group. Tocilizumab in patients admitted to hospital with COVID-19 (RECOVERY): a randomised, controlled, open-label, platform trial. *Lancet* **397**, 1637–1645 (2021)

The RECOVERY Collaborative Group. Dexamethasone in Hospitalized Patients with Covid-19. *N. Engl. J. Med.* **384**, 693–704 (2021)

Thoms, M. *et al.* Structural basis for translational shutdown and immune evasion by the Nsp1 protein of SARS-CoV-2. *Science (80-. ).* **369**, 1249–1256 (2020)

Thorne, L. G. *et al.* SARS-CoV-2 sensing by RIG-I and MDA5 links epithelial infection to macrophage inflammation. *EMBO J.* **40**, 2020.12.23.424169 (2021)

Tolcher, A. *et al.* A phase i trial of LY2584702 tosylate, a p70 S6 kinase inhibitor, in patients with advanced solid tumours. *Eur. J. Cancer* **50**, 867–875 (2014)

Totzke, J. *et al.* Takinib, a Selective TAK1 Inhibitor, Broadens the Therapeutic Efficacy of TNF- $\alpha$  Inhibition for Cancer and Autoimmune Disease. *Cell Chem. Biol.* **24**, 1029-1039.e7 (2017)

Ucciferri, C. *et al.* Canakinumab in a subgroup of patients with COVID-19. *Lancet Rheumatol.* **2**, e457-ee458 (2020)

Uhal, B. D., Li, X., Xue, A., Gao, X. & Abdul-Hafez, A. Regulation of alveolar epithelial cell survival by the ACE-2/angiotensin 1-7/ Mas axis. *Am. J. Physiol. - Lung Cell. Mol. Physiol.* **301**, 269–274 (2011)

- Vabret, N. *et al.* Immunology of COVID-19: Current State of the Science. *Immunity* **52**, 910–941 (2020)
- Vaduganathan, M. *et al.* Renin–Angiotensin–Aldosterone System Inhibitors in Patients with Covid-19. *N. Engl. J. Med.* **382**, 1653–1659 (2020)
- Vanderheiden, A. *et al.* Type I and Type III Interferons Restrict SARS-CoV-2 Infection of Human Airway Epithelial Cultures. *J. Virol.* **94**, (2020)
- Vincent, M. J. *et al.* Chloroquine is a potent inhibitor of SARS coronavirus infection and spread. *Virol. J.* **2**, 1–10 (2005)
- Viswanathan, T. *et al.* Structural basis of RNA cap modification by SARS-CoV-2. *Nat. Commun.* **11**, 3718–7 (2020)
- Wack, A., Terczyńska-Dyla, E. & Hartmann, R. Guarding the frontiers: The biology of type III interferons. *Nat. Immunol.* **16**, 802–809 (2015)
- Walls, A. C. *et al.* Structure, Function, and Antigenicity of the SARS-CoV-2 Spike Glycoprotein. *Cell* **181**, 281-292.e6 (2020)
- Walters, B. & Thompson, S. R. Cap-independent translational control of carcinogenesis. *Front. Oncol.* **6**, 128 (2016)
- Wang, J. *et al.* Urban particulate matter triggers lung inflammation via the ROS-MAPK- NF- $\kappa$ B signaling pathway. *J. Thorac. Dis.* **9**, 4398–4412 (2017)
- Wang, M. *et al.* Remdesivir and chloroquine effectively inhibit the recently emerged novel coronavirus (2019-nCoV) in vitro. *Cell Res.* **30**, 269–271 (2020)
- Wang, S. *et al.* Endocytosis of the receptor-binding domain of SARS-CoV spike protein together with virus receptor ACE2. *Virus Res.* **136**, 8–15 (2008)
- Wang, X. *et al.* The anti-influenza virus drug, arbidol is an efficient inhibitor of SARS-CoV-2 in vitro. *Cell Discov.* **6**, 4–8 (2020)
- Winer, E. S. & DeAngelo, D. J. A Review of Omacetaxine: A Chronic Myeloid Leukemia Treatment Resurrected. *Oncol. Ther.* **6**, 9–20 (2018)
- Wolff, G. *et al.* A molecular pore spans the double membrane of the coronavirus replication organelle. *Science (80-. ).* **369**, 1395–1398 (2020)
- Xia, H. *et al.* Evasion of Type I Interferon by SARS-CoV-2. *Cell Rep.* **33**, 108234 (2020)
- Xiu, S. *et al.* Inhibitors of SARS-CoV-2 Entry: Current and Future Opportunities. *J. Med. Chem.* **63**, 12256–12274 (2020)

- Xu, W. feng *et al.* Gasdermin E-derived caspase-3 inhibitors effectively protect mice from acute hepatic failure. *Acta Pharmacol. Sin.* **42**, 68–76 (2021)
- Yang, J. *et al.* Targeting PI3K in cancer: mechanisms and advances in clinical trials. *Mol. Cancer* **18**, 26 (2019)
- Yang, Q. *et al.* Inhibition of SARS-CoV-2 viral entry in vitro upon blocking N- and O-glycan elaboration. *bioRxiv* **9**, (2020)
- Yao, H. *et al.* Molecular Architecture of the SARS-CoV-2 Virus. *Cell* **183**, 730-738.e13 (2020)
- Yu, T. *et al.* TBK1 inhibitors: A review of patent literature (2011 - 2014). *Expert Opin. Ther. Pat.* **25**, 1385–1396 (2015)
- Yuen, C. K. *et al.* SARS-CoV-2 nsp13, nsp14, nsp15 and orf6 function as potent interferon antagonists. *Emerg. Microbes Infect.* **9**, 1418–1428 (2020)
- Zang, R. *et al.* Cholesterol 25-hydroxylase suppresses SARS-CoV-2 replication by blocking membrane fusion. *Proc. Natl. Acad. Sci. U. S. A.* **117**, 32105–32113 (2020)
- Zhang, H. *et al.* Selective, potent blockade of the IRE1 and ATF6 pathways by 4-phenylbutyric acid analogues. *Br. J. Pharmacol.* **170**, 822–834 (2013)
- Zhang, X. *et al.* Sequential ER stress and inflammatory responses are induced by SARS-CoV-2 ORF3 through ERphagy. *bioRxiv* (2020) doi:10.1101/2020.11.17.387902
- Zhao, X. *et al.* LY6E Restricts Entry of Human Coronaviruses, Including Currently Pandemic SARS-CoV-2. *J. Virol.* **94**, (2020)
- Zhou, P. *et al.* A pneumonia outbreak associated with a new coronavirus of probable bat origin. *Nature* **579**, 270–273 (2020)
